# Supplementary material for: Knockdown of hsa_circ_0008922 inhibits the progression of glioma
Source: PeerJ. 2022 Dec 20;10:e14552. doi: 10.7717/peerj.14552 (PMC9784332; doi:10.7717/peerj.14552)
Supplement: Supplemental Information 4 [file peerj-10-14552-s004.xlsx]

## Sheet: Sheet1
#Condition pair: T1_vs_C Column A: circRNA_ID, The ID of circRNA. Column B: Locus, The position of circRNA in reference genome. Column C: Gene_Name, The gene name of circRNA. Column D: Source, The source of circRNA. Column E: Length, The sequence length of circRNA. Column F: Exons_Num, The number of exons in the circRNA. Column G: Genomic_Length, The genomic splice length of circRNA. Column H: Fl…
CircRNA Annotation														DE Statistic				CPM
circRNA_ID	Locus	Gene_Name	Source	Length	Exons_Num	Genomic_Length	Flank_Intron	Gene_ID	Trans_ID	RefSeq_ID	Samples	Annotation	circRNA_Study	log2FC	Fold_Change	p_value	q_value	T1_CPM	C_CPM	1	2	3	4	5	6	7	8	9	10
hsa_circ_0110181	chr1:101379218-101440458:+	SLC30A7	circBase	665	6	61240	chr1:101377794-101379218|chr1:101440458-101440774	ENSG00000162695.11_3	ENST00000370112.8_1	NM_001144884	diencephalon, cerebellum, occipital_lobe, frontal_cortex, parietal_lobe, temporal_lobe	ANNOTATED, CDS, coding, INTERNAL, OVCODE, OVEXON, UTR3	Rybak2015	-1.26584	0.415858	0.277758	0.591851	6.50943	7.77527	31.9932	0	324.409	502.403	219.898	382.764	0	0	0	0
hsa_circ_0005199	chr1:10155518-10165802:+	UBE4B	circBase	598	4	10284	chr1:10132272-10155518|chr1:10165802-10177516	ENSG00000130939.18_3	ENST00000253251.12_1	NM_001105562	Hs68_RNase, Hs68_control, Nhek, K562, Huvec, Hepg2, Helas3, H1hesc, Gm12878, Bj, Ag04450, A549, Nhlf, Sknshra, Mcf7, diencephalon, cerebellum, occipital_lobe, frontal_cortex, parietal_lobe, temporal_lobe	ANNOTATED, CDS, coding, INTERNAL, OVCODE, OVEXON	Jeck2013, Rybak2015, Salzman2013	0.0860789	1.06148	1	1	8.0643	7.97822	191.959	54.8414	695.163	287.087	36.6497	287.073	191.248	295.599	226.168	310.555
hsa_circ_0110210	chr1:10292307-10338186:+	KIF1B	circBase	1241	11	45879	chr1:10270936-10292307|chr1:10338186-10342457	ENSG00000054523.17_3	ENST00000377093.8_1	ENST00000377086.1	diencephalon, cerebellum, occipital_lobe, frontal_cortex, parietal_lobe, temporal_lobe	ANNOTATED, CDS, coding, INTERNAL, OVCODE, OVEXON, UTR5	Rybak2015	1.00938	2.01305	0.357674	0.65544	8.23188	7.2225	63.9865	109.683	0	466.517	73.2994	191.382	892.492	0	301.557	77.6388
hsa_circ_0110252	chr1:10351139-10357304:+	KIF1B	circBase	681	7	6165	chr1:10342591-10351139|chr1:10357304-10363220	ENSG00000054523.17_3	ENST00000377093.8_1	ENST00000377086.1	diencephalon, cerebellum, occipital_lobe, frontal_cortex, parietal_lobe, temporal_lobe	ANNOTATED, CDS, coding, INTERNAL, OVCODE, OVEXON	Rybak2015	0.552878	1.46701	0.643982	0.851366	7.51491	6.96203	31.9932	27.4207	185.377	179.43	183.248	0	509.995	0	150.778	232.916
hsa_circ_0009711	chr1:10407818-10408791:+	KIF1B	circBase	152	2	973	chr1:10406011-10407818|chr1:10408791-10412688	ENSG00000054523.17_3	ENST00000263934.10_1	NM_015074	Bj, A549, diencephalon, cerebellum, occipital_lobe, frontal_cortex, parietal_lobe, temporal_lobe	ANNOTATED, CDS, coding, INTERNAL, OVCODE, OVEXON	Rybak2015, Salzman2013	-0.398493	0.75865	0.578151	0.810856	9.91865	10.3171	2367.5	1398.46	1158.6	610.061	806.293	478.455	2804.97	147.8	1055.45	310.555
hsa_circ_0000099	chr1:104108056-104118162:+	AMY2B	circBase	1307	8	10106	chr1:104097731-104108056|chr1:104118162-104120111	ENSG00000240038.6_3	ENST00000361355.8_1	NM_020978	cd_19, Nhek, Gm12878, diencephalon, cerebellum, occipital_lobe, frontal_cortex, parietal_lobe, temporal_lobe, adipose, vena_cava	ANNOTATED, CDS, coding, INTERNAL, UTR5	Maass2017, Memczak2013, Rybak2015, Salzman2013	-0.0873179	0.941271	0.909648	0.990212	9.83593	9.92325	1471.69	932.304	926.884	538.289	952.892	861.219	1147.49	73.8999	753.892	1708.05
hsa_circ_0009716	chr1:10423340-10425706:+	KIF1B	circBase	448	3	2366	chr1:10421883-10423340|chr1:10425706-10428524	ENSG00000054523.17_3	ENST00000263934.10_1	NM_015074	Nhek, Gm12878, Bj, diencephalon, cerebellum, occipital_lobe, frontal_cortex, parietal_lobe, temporal_lobe	ANNOTATED, CDS, coding, INTERNAL, OVCODE, OVEXON	Rybak2015, Salzman2013	-1.44174	0.368122	0.159368	0.465656	6.46745	7.9092	415.912	274.207	185.377	179.43	109.949	0	127.499	73.8999	0	232.916
hsa_circ_0004270	chr1:108690900-108703915:-	SLC25A24	circBase	532	4	13015	chr1:108686332-108690900|chr1:108703915-108724562	ENSG00000085491.15_2	ENST00000565488.5_1	NM_013386	Hs68_RNase, Hs68_control, K562, Huvec, Gm12878, Ag04450, Sknshra, diencephalon, cerebellum, occipital_lobe, frontal_cortex, Sy5y_exp1_D2, parietal_lobe, temporal_lobe	ANNOTATED, CDS, coding, INTERNAL, OVCODE, OVEXON	Jeck2013, Rybak2015, Salzman2013	0.462708	1.37813	0.795114	0.941815	6.73892	6.27621	0	27.4207	46.3442	215.316	73.2994	0	0	147.8	376.946	0
hsa_circ_0013390	chr1:109439485-109446876:+	GPSM2	circBase	1136	8	7391	chr1:109428200-109439485|chr1:109446876-109456959	ENSG00000121957.12_3	ENST00000406462.6_1	NM_013296	K562, Gm12878, Ag04450, diencephalon, cerebellum, occipital_lobe, frontal_cortex, parietal_lobe, temporal_lobe	ANNOTATED, CDS, coding, INTERNAL, OVCODE, OVERLAPTX, OVEXON	Rybak2015, Salzman2013	-0.0909127	0.938929	0.939723	1	7.78833	7.87924	127.973	191.945	370.753	287.087	183.248	239.227	446.246	295.599	75.3892	0
hsa_circ_0006576	chr1:11184554-11193254:-	MTOR	circBase	1416	10	8700	chr1:11182183-11184554|chr1:11193254-11194407	ENSG00000198793.12_3	ENST00000361445.8_2	NM_004958	Hs68_RNase, Hs68_control, diencephalon, cerebellum, occipital_lobe, frontal_cortex, parietal_lobe, temporal_lobe	ANNOTATED, CDS, coding, INTERNAL, OVCODE, OVEXON	Jeck2013, Rybak2015	-1.48847	0.35639	0.173632	0.488363	6.5215	8.00997	319.932	137.104	417.098	394.745	0	191.382	0	221.7	0	0
hsa_circ_0000107	chr1:113098489-113159517:-	ST7L	circBase	1191	11	61028	chr1:113093315-113098489|chr1:113159517-113161530	ENSG00000007341.18_2	ENST00000361846.7_1	NM_138729	cd_34, diencephalon, cerebellum, occipital_lobe, frontal_cortex, parietal_lobe, temporal_lobe, platelets	ANNOTATED, CDS, coding, INTERNAL	Maass2017, Memczak2013, Rybak2015	-0.248115	0.841996	0.844193	0.961494	7.03971	7.28783	31.9932	164.524	46.3442	322.973	183.248	143.536	318.747	0	150.778	0
hsa_circ_0000109	chr1:113196219-113202401:+	CAPZA1	circBase	430	4	6182	chr1:113192091-113196219|chr1:113202401-113209695	ENSG00000116489.12_2	ENST00000263168.3_1	NM_006135	cd_19, Hs68_RNase, Hs68_control, Nhek, K562, Huvec, Hepg2, Helas3, H1hesc, Gm12878, Bj, Ag04450, A549, Sknshra, Mcf7, diencephalon, occipital_lobe, frontal_cortex	ANNOTATED, CDS, coding, INTERNAL, OVCODE, OVEXON	Jeck2013, Memczak2013, Rybak2015, Salzman2013	0.438126	1.35484	0.542687	0.789439	8.79012	8.35199	191.959	329.049	324.409	287.087	476.446	334.918	573.745	369.499	678.503	232.916
hsa_circ_0004127	chr1:115005725-115007010:-	TRIM33	circBase	397	3	1285	chr1:114976355-115005725|chr1:115007010-115053171	ENSG00000197323.11_3	ENST00000358465.6_1	NM_015906	Hs68_RNase, Hs68_control, Nhek, K562, Hepg2, Helas3, H1hesc, Gm12878, Bj, Ag04450, A549, Sknshra, Mcf7, SY5Y_exp2_D0, diencephalon, Sy5y_exp1_D4, cerebellum, Sy5y_exp1_D0, occipital_lobe, frontal_cortex, Sy5y_exp1_D2, parietal_lobe, temporal_lobe, SY5Y_exp2_D4, placenta, platelets	ANNOTATED, CDS, coding, INTERNAL, OVCODE, OVEXON	Jeck2013, Maass2017, Rybak2015, Salzman2013	-0.439144	0.737572	0.523868	0.778561	8.71403	9.15317	543.885	520.994	556.13	466.517	732.994	382.764	191.248	443.399	527.725	543.471
hsa_circ_0000002	chr1:1158623-1159348:-	SDF4	circBase	251	2	725	chr1:1154307-1158623|chr1:1159348-1163847	ENSG00000078808.16_2	ENST00000360001.10_1	NM_016176	cd_19, K562, Huvec, Hsmm, Hepg2, Helas3, H1hesc, Gm12878, Bj, Ag04450, A549, Sknshra, Mcf7, SY5Y_exp2_D0, diencephalon, Sy5y_exp1_D4, cerebellum, Sy5y_exp1_D0, occipital_lobe, frontal_cortex, Sy5y_exp1_D2, parietal_lobe, SY5Y_exp2_D8, temporal_lobe, SY5Y_exp2_D4, chondrocytes, WAS2, cortex, adipose, decidua, HUAEC, platelets	ANNOTATED, CDS, coding, INTERNAL	Maass2017, Memczak2013, Rybak2015, Salzman2013	0.198122	1.1472	0.817919	0.95172	8.4027	8.20458	127.973	520.994	509.786	71.7719	219.898	143.536	254.998	147.8	603.114	543.471
hsa_circ_0000116	chr1:117944807-117948267:+	MAN1A2	circBase	353	2	3460	chr1:117911107-117944807|chr1:117948267-117957334	ENSG00000198162.12_3	ENST00000356554.7_1	NM_006699	cd_19, K562, diencephalon, Sy5y_exp1_D4, cerebellum, Sy5y_exp1_D0, occipital_lobe, frontal_cortex, Sy5y_exp1_D2, parietal_lobe, temporal_lobe, ada_scid, vena_cava, umbilical_cord, muscle, HUAEC, platelets	ANNOTATED, CDS, coding, INTERNAL	Maass2017, Memczak2013, Rybak2015, Salzman2013	-1.35447	0.391078	0.172544	0.487262	6.66358	8.01805	223.953	356.469	324.409	215.316	146.599	47.8455	0	147.8	150.778	155.278
hsa_circ_0000117	chr1:117944807-117957453:+	MAN1A2	circBase	472	3	12646	chr1:117911107-117944807|chr1:117957453-117963190	ENSG00000198162.12_3	ENST00000356554.7_1	NM_006699	HEK293, cd_19, Hs68_RNase, Hs68_control, SY5Y_exp2_D0, diencephalon, Sy5y_exp1_D4, cerebellum, Sy5y_exp1_D0, occipital_lobe, frontal_cortex, Sy5y_exp1_D2, parietal_lobe, SY5Y_exp2_D8, temporal_lobe, SY5Y_exp2_D4, EPC, chondrocytes, WAS2, ada_scid, cortex, decidua, vena_cava, right_atrium, muscle, MSC_047, neutophils, placenta, platelets	ANNOTATED, CDS, coding, INTERNAL, OVCODE, OVEXON	Jeck2013, Maass2017, Memczak2013, Rybak2015	-1.38074	0.384023	0.0186678	0.170222	10.2297	11.6104	3199.32	3592.11	2456.24	3086.19	3261.82	2200.89	1211.24	517.299	980.06	1009.3
hsa_circ_0000118	chr1:117944807-117963271:+	MAN1A2	circBase	553	4	18464	chr1:117911107-117944807|chr1:117963271-117984852	ENSG00000198162.12_3	ENST00000356554.7_1	NM_006699	HEK293, cd_19, cd_34, neutr, SY5Y_exp2_D0, diencephalon, Sy5y_exp1_D4, cerebellum, Sy5y_exp1_D0, occipital_lobe, frontal_cortex, Sy5y_exp1_D2, parietal_lobe, SY5Y_exp2_D8, temporal_lobe, SY5Y_exp2_D4, EPC, chondrocytes, WAS2, ada_scid, cortex, adipose, decidua, vena_cava, right_atrium, umbilical_cord, muscle, MSC_047, LCL, HUAEC, neutophils, placenta, platelets	ANNOTATED, CDS, coding, INTERNAL	Maass2017, Memczak2013, Rybak2015	-1.0672	0.477246	0.0877045	0.358043	12.6193	13.6864	9501.99	9844.04	7600.45	19737.3	19204.4	15262.7	6056.2	4138.39	3090.96	2795
hsa_circ_0000119	chr1:117944807-117984947:+	MAN1A2	circBase	648	5	40140	chr1:117911107-117944807|chr1:117984947-118003110	ENSG00000198162.12_3	ENST00000356554.7_1	NM_006699	HEK293, cd_19, Nhek, K562, Huvec, Hepg2, Helas3, Gm12878, Bj, Ag04450, A549, Sknshra, SY5Y_exp2_D0, diencephalon, Sy5y_exp1_D4, cerebellum, Sy5y_exp1_D0, occipital_lobe, frontal_cortex, Sy5y_exp1_D2, parietal_lobe, SY5Y_exp2_D8, temporal_lobe, SY5Y_exp2_D4, chondrocytes, WAS2, ada_scid, cortex, osteocytes, decidua, vena_cava, umbilical_cord, LCL, neutophils, platelets	ANNOTATED, CDS, coding, INTERNAL	Maass2017, Memczak2013, Rybak2015, Salzman2013	-1.24945	0.42061	0.0431438	0.255384	10.6263	11.8757	2975.37	3482.43	2734.31	5131.69	4434.61	3684.1	573.745	1034.6	1583.17	931.665
hsa_circ_0000120	chr1:117944807-118009049:+	MAN1A2	circBase	866	7	64242	chr1:117911107-117944807|chr1:118009049-118035768	ENSG00000198162.12_3	ENST00000356554.7_1	NM_006699	cd_19, diencephalon, Sy5y_exp1_D4, cerebellum, occipital_lobe, frontal_cortex, parietal_lobe, temporal_lobe, SY5Y_exp2_D4	ANNOTATED, CDS, coding, INTERNAL	Memczak2013, Rybak2015	-0.660228	0.632778	0.395133	0.691683	8.64398	9.30421	479.898	575.835	185.377	1076.58	806.293	478.455	0	738.999	603.114	155.278
hsa_circ_0002059	chr1:118003110-118045592:+	MAN1A2	circBase	843	6	42482	chr1:117984947-118003110|chr1:118045592-118065446	ENSG00000198162.12_3	ENST00000356554.7_1	NM_006699	Hs68_RNase, Hs68_control, SY5Y_exp2_D0, diencephalon, Sy5y_exp1_D4, cerebellum, occipital_lobe, frontal_cortex, parietal_lobe, temporal_lobe	ANNOTATED, CDS, coding, INTERNAL, OVCODE, OVEXON	Jeck2013, Rybak2015	-1.62841	0.323445	0.024593	0.19168	8.02012	9.64852	447.905	438.731	787.851	1148.35	1172.79	574.146	191.248	0	226.168	232.916
hsa_circ_0006470	chr1:12061457-12062160:+	MFN2	circBase	344	3	703	chr1:12059152-12061457|chr1:12062160-12064048	ENSG00000116688.16_2	ENST00000444836.5_1	NM_014874	Hs68_RNase, Hs68_control, K562, Hepg2, Helas3, H1hesc, Gm12878, Bj, Ag04450, Sknshra, diencephalon, cerebellum, occipital_lobe, frontal_cortex, parietal_lobe, temporal_lobe, decidua, platelets	ANNOTATED, CDS, coding, INTERNAL, OVCODE, OVEXON	Jeck2013, Maass2017, Rybak2015, Salzman2013	0.931937	1.90784	0.265537	0.585498	8.50203	7.57009	287.939	246.786	278.065	107.658	0	95.691	573.745	295.599	527.725	310.555
hsa_circ_0005012	chr1:121115831-121116815:+	SRGAP2C	circBase	345	2	984	chr1:121107216-121115831|chr1:121116815-121124561	ENSG00000171943.7	ENST00000367123.3		Hs68_RNase, Hs68_control	INTERGENIC	Jeck2013	-2.64895	0.159436	0.0205143	0.175973	6.12962	8.77857	1087.77	822.622	92.6884	143.544	0	95.691	0	221.7	0	0
hsa_circ_0009964	chr1:12335881-12338095:+	VPS13D	circBase	2214	1	2214	chr1:12333192-12335881|chr1:12338095-12339555	ENSG00000048707.13_3	ENST00000613099.4_1	NM_015378	Nhek, K562, Huvec, Hepg2, H1hesc, Gm12878, Bj, Ag04450, A549, diencephalon, cerebellum, occipital_lobe, frontal_cortex, Sy5y_exp1_D2, parietal_lobe, temporal_lobe, adipose, vena_cava	ANNOTATED, CDS, coding, INTERNAL, OVCODE, OVEXON	Maass2017, Rybak2015, Salzman2013	-1.07124	0.475908	0.278275	0.591851	7.22733	8.29858	447.905	712.939	185.377	143.544	36.6497	191.382	0	221.7	0	310.555
hsa_circ_0110664	chr1:14099572-14109326:+	PRDM2	circBase	4525	2	9754	chr1:14075982-14099572|chr1:14109326-14113009	ENSG00000116731.22_3	ENST00000311066.9_1	NM_012231	Sy5y_exp1_D2, temporal_lobe	ANNOTATED, CDS, coding, INTERNAL, OVCODE, OVEXON	Rybak2015	-1.07893	0.47338	0.209326	0.532491	8.00863	9.08756	511.892	301.628	92.6884	681.833	1099.49	909.064	127.499	0	0	155.278
hsa_circ_0010029	chr1:14104912-14109326:+	PRDM2	circBase	4414	1	4414	chr1:14099683-14104912|chr1:14109326-14113009	ENSG00000116731.22_3	ENST00000311066.9_1	NM_012231	Nhek, K562, Bj, Ag04450, A549, Sy5y_exp1_D4, WAS2	ANNOTATED, CDS, coding, INTERNAL, OVCODE, OVEXON	Maass2017, Rybak2015, Salzman2013	-1.85536	0.276363	0.1049	0.385109	5.94766	7.80302	447.905	191.945	0	143.544	293.197	0	0	147.8	150.778	0
hsa_circ_0008390	chr1:144994590-145021167:-	PDE4DIP	circBase	319	3	26577	chr1:144955292-144994590|chr1:145021167-145039589	ENSG00000178104.19_3	ENST00000618462.4_1	NM_001198832	Hs68_RNase, Hs68_control, Bj, Ag04450, Sknshra, diencephalon, cerebellum, occipital_lobe, frontal_cortex, parietal_lobe, temporal_lobe	ANNOTATED, CDS, coding, INTERNAL, OVCODE, OVEXON	Jeck2013, Rybak2015, Salzman2013	-0.841553	0.558043	0.244739	0.57032	9.00318	9.84473	735.844	1096.83	370.753	1327.78	1026.19	1243.98	191.248	369.499	678.503	0
hsa_circ_0004694	chr1:145015859-145021167:-	PDE4DIP	circBase	208	2	5308	chr1:144994701-145015859|chr1:145021167-145039589	ENSG00000178104.19_3	ENST00000618462.4_1	NM_001198832	Hs68_RNase, Hs68_control, diencephalon, cerebellum, occipital_lobe, frontal_cortex, parietal_lobe, temporal_lobe	ANNOTATED, CDS, coding, INTERNAL, OVCODE, OVEXON	Jeck2013, Rybak2015	-1.05182	0.482359	0.262193	0.582101	7.5704	8.62222	511.892	520.994	324.409	430.631	146.599	574.146	0	0	301.557	0
hsa_circ_0110705	chr1:145646114-145663367:+	RNF115	circBase	326	3	17253	chr1:145611341-145646114|chr1:145663367-145682022	ENSG00000265491.4_2	ENST00000582693.4_1	ENST00000369291.4	diencephalon, cerebellum, occipital_lobe, frontal_cortex, parietal_lobe, temporal_lobe	ANNOTATED, CDS, coding, INTERNAL, OVCODE, OVEXON	Rybak2015	-1.4721	0.360458	0.100478	0.375087	6.97144	8.44354	543.885	329.049	556.13	215.316	73.2994	95.691	127.499	0	150.778	232.916
hsa_circ_0005640	chr1:145787771-145791170:-	GPR89A	circBase	292	3	3399	chr1:145771730-145787771|chr1:145791170-145803307	ENSG00000117262.18_2	ENST00000313835.13_1	NM_001097613	Hs68_RNase, Hs68_control	ANNOTATED, CDS, coding, INTERNAL, OVCODE, OVEXON	Jeck2013	-0.782019	0.581552	0.46492	0.739632	6.54517	7.32719	255.946	164.524	92.6884	143.544	109.949	143.536	127.499	147.8	0	0
hsa_circ_0004220	chr1:146724277-146731572:+	CHD1L	circBase	342	4	7295	chr1:146714480-146724277|chr1:146731572-146736080	ENSG00000131778.18_3	ENST00000431239.5_1	NM_004284	Hs68_RNase, Hs68_control, Nhek, K562, Helas3, H1hesc, Gm12878, Bj, Ag04450, diencephalon, cerebellum, Sy5y_exp1_D0, occipital_lobe, frontal_cortex, Sy5y_exp1_D2, parietal_lobe, temporal_lobe, WAS2, platelets	ANNOTATED, CDS, coding, INTERNAL, OVCODE, OVEXON	Jeck2013, Maass2017, Rybak2015, Salzman2013	0.0331426	1.02324	1	1	7.77741	7.74427	191.959	0	92.6884	251.202	513.096	287.073	382.497	0	226.168	155.278
hsa_circ_0110716	chr1:147120047-147131890:-	ACP6	circBase	924	8	11843	chr1:147119368-147120047|chr1:147131890-147141951	ENSG00000162836.11_2	ENST00000583509.6_1	NM_016361	diencephalon, cerebellum, occipital_lobe, frontal_cortex, parietal_lobe, temporal_lobe	ANNOTATED, CDS, coding, INTERNAL, OVCODE, OVEXON	Rybak2015	1.858	3.62504	0.0330796	0.219534	8.20133	6.34333	0	109.683	46.3442	35.8859	183.248	287.073	318.747	221.7	150.778	465.833
hsa_circ_0110723	chr1:149931602-149936274:-	OTUD7B	circBase	241	2	4672	chr1:149922124-149931602|chr1:149936274-149937701	ENSG00000264522.5_2	ENST00000581312.5_1	NM_020205	diencephalon, cerebellum, Sy5y_exp1_D0, occipital_lobe, frontal_cortex, temporal_lobe	ANNOTATED, CDS, coding, INTERNAL, OVCODE, OVEXON	Rybak2015	-0.359581	0.779391	0.700792	0.887486	7.49907	7.85865	191.959	219.366	324.409	0	403.147	95.691	191.248	221.7	376.946	0
hsa_circ_0006760	chr1:150997086-150998149:+	PRUNE	circBase	344	2	1063	chr1:150991145-150997086|chr1:150998149-150999708	ENSG00000143363.15_3	ENST00000467771.5_1	NM_021222	Hs68_RNase, Hs68_control, K562, H1hesc, Gm12878, diencephalon, cerebellum, occipital_lobe, frontal_cortex, parietal_lobe, temporal_lobe, muscle, neutophils	ANNOTATED, CDS, coding, INTERNAL, OVCODE, OVEXON	Jeck2013, Maass2017, Rybak2015, Salzman2013	0.213055	1.15914	0.860158	0.967515	8.2233	8.01025	351.926	548.414	46.3442	107.658	183.248	143.536	0	812.899	301.557	232.916
hsa_circ_0000126	chr1:150997086-150999803:+	PRUNE	circBase	439	3	2717	chr1:150991145-150997086|chr1:150999803-151001261	ENSG00000143363.15_3	ENST00000467771.5_1	NM_021222	cd_19, K562, Gm12878, Ag04450, Sknshra, SY5Y_exp2_D0, diencephalon, cerebellum, occipital_lobe, frontal_cortex, parietal_lobe, temporal_lobe	ANNOTATED, CDS, coding, INTERNAL	Memczak2013, Rybak2015, Salzman2013	0.573684	1.48832	0.600184	0.82745	7.3445	6.77081	159.966	54.8414	46.3442	107.658	146.599	47.8455	0	0	452.335	310.555
hsa_circ_0110790	chr1:151060665-151079698:+	GABPB2	circBase	922	6	19033	chr1:151043410-151060665|chr1:151079698-151089867	ENSG00000143458.11_2	ENST00000368918.7_2	ENST00000368918.3	diencephalon, Sy5y_exp1_D0, occipital_lobe, frontal_cortex, parietal_lobe, temporal_lobe	ANNOTATED, CDS, coding, INTERNAL, OVCODE, OVEXON	Rybak2015	-2.03878	0.24337	0.0467332	0.266958	5.74842	7.7872	127.973	301.628	324.409	215.316	109.949	143.536	63.7494	0	0	0
hsa_circ_0000128	chr1:151139409-151139890:+	TNFAIP8L2-SCNM1	circBase	276	3	481	chr1:151139017-151139409|chr1:151139890-151140619	ENSG00000163156.11_3	ENST00000602841.5_1	NM_001204848	cd_19, neutr, Hs68_RNase, Hs68_control, Nhek, K562, Huvec, Hsmm, Hepg2, Helas3, H1hesc, Gm12878, Bj, Ag04450, A549, Sknshra, Mcf7, diencephalon, Sy5y_exp1_D4, cerebellum, Sy5y_exp1_D0, occipital_lobe, frontal_cortex, Sy5y_exp1_D2, parietal_lobe, temporal_lobe, platelets	ANNOTATED, CDS, coding, INTERNAL, OVCODE, OVEXON	Jeck2013, Maass2017, Memczak2013, Rybak2015, Salzman2013	2.32364	5.00595	0.0412003	0.250894	7.89015	5.5665	63.9865	54.8414	92.6884	0	0	143.536	127.499	295.599	603.114	0
hsa_circ_0006892	chr1:151288048-151288985:-	PI4KB	circBase	937	1	937	chr1:151280277-151288048|chr1:151288985-151299746	ENSG00000143393.16_4	ENST00000368874.8_3	NM_001198773	Hs68_RNase, Hs68_control, Nhek, K562, Huvec, Hepg2, Helas3, H1hesc, Gm12878, Bj, Ag04450, A549, Sknshra, Mcf7, diencephalon, cerebellum, occipital_lobe, frontal_cortex, parietal_lobe, temporal_lobe, WAS2	ANNOTATED, CDS, coding, INTERNAL, OVCODE, OVEXON, UTR5	Jeck2013, Maass2017, Rybak2015, Salzman2013	-0.53866	0.68841	0.642704	0.85057	7.45097	7.98963	159.966	274.207	417.098	251.202	146.599	95.691	0	0	0	776.388
hsa_circ_0002520	chr1:151400298-151414681:-	POGZ	circBase	920	5	14383	chr1:151397537-151400298|chr1:151414681-151431627	ENSG00000143442.21_3	ENST00000358476.7_1	NM_015100	Hs68_RNase, Hs68_control, Nhek, K562, Hsmm, Hepg2, Helas3, H1hesc, Bj, Ag04450, A549, Sknshra, diencephalon, frontal_cortex, parietal_lobe, temporal_lobe	ANNOTATED, CDS, coding, INTERNAL, OVCODE, OVEXON, UTR5	Jeck2013, Rybak2015, Salzman2013	-0.437362	0.738483	0.62798	0.842309	7.50325	7.94061	383.919	219.366	0	215.316	366.497	287.073	191.248	73.8999	150.778	155.278
hsa_circ_0000133	chr1:153637695-153641033:-	ILF2	circBase	469	5	3338	chr1:153636950-153637695|chr1:153641033-153642311	ENSG00000143621.16_2	ENST00000361891.8_1	NM_004515	cd_34, neutr, Hs68_RNase, Hs68_control, diencephalon, Sy5y_exp1_D4, cerebellum, Sy5y_exp1_D0, occipital_lobe, frontal_cortex, Sy5y_exp1_D2, parietal_lobe, temporal_lobe	ANNOTATED, CDS, coding, INTERNAL, OVCODE, OVEXON	Jeck2013, Memczak2013, Rybak2015	3.2604	9.58252	0.0328688	0.219534	6.92425	3.66385	0	0	0	35.8859	0	143.536	127.499	147.8	75.3892	77.6388
hsa_circ_0110845	chr1:154207066-154207767:+	UBAP2L	circBase	265	2	701	chr1:154201201-154207066|chr1:154207767-154209041	ENSG00000143569.18_3	ENST00000343815.10_1	ENST00000271877.7	diencephalon, cerebellum, occipital_lobe, frontal_cortex, parietal_lobe, temporal_lobe	ANNOTATED, CDS, coding, INTERNAL, OVCODE, OVEXON	Rybak2015	0.386354	1.30709	0.762333	0.923503	7.53458	7.14822	63.9865	164.524	46.3442	143.544	256.548	191.382	318.747	221.7	0	155.278
hsa_circ_0014584	chr1:155365249-155429689:-	ASH1L	circBase	1119	4	64440	chr1:155349922-155365249|chr1:155429689-155447676	ENSG00000116539.12_3	ENST00000368346.7_1	NM_018489	Hepg2, H1hesc, Gm12878, Ag04450, A549, Sknshra, diencephalon, cerebellum, occipital_lobe, frontal_cortex, parietal_lobe, temporal_lobe	ANNOTATED, CDS, coding, INTERNAL, OVCODE, OVERLAPTX, OVEXON	Rybak2015, Salzman2013	0.238079	1.17942	0.773273	0.928436	8.77305	8.53497	479.898	137.104	463.442	610.061	146.599	287.073	382.497	369.499	980.06	155.278
hsa_circ_0014586	chr1:155385534-155429689:-	ASH1L	circBase	1024	3	44155	chr1:155365344-155385534|chr1:155429689-155447676	ENSG00000116539.12_3	ENST00000368346.7_1	NM_018489	Hepg2, Helas3, Bj, Ag04450, A549, diencephalon, cerebellum, Sy5y_exp1_D0, occipital_lobe, frontal_cortex	ANNOTATED, CDS, coding, INTERNAL, OVCODE, OVERLAPTX, OVEXON	Rybak2015, Salzman2013	-0.475576	0.71918	0.706321	0.890054	6.5196	6.99517	159.966	82.2622	231.721	107.658	36.6497	191.382	63.7494	0	0	155.278
hsa_circ_0000137	chr1:155408117-155408859:-	ASH1L	circBase	742	1	742	chr1:155385714-155408117|chr1:155408859-155429587	ENSG00000116539.12_3	ENST00000368346.7_1	NM_018489	cd_19, Hs68_RNase, Hs68_control, K562, Gm12878, Bj, Ag04450, diencephalon, Sy5y_exp1_D4, cerebellum, Sy5y_exp1_D0, occipital_lobe, frontal_cortex, Sy5y_exp1_D2, parietal_lobe, temporal_lobe, SY5Y_exp2_D4, WAS2, cortex, osteocytes, vena_cava, LCL, platelets	ANNOTATED, CDS, coding, INTERNAL, OVCODE, OVEXON	Jeck2013, Maass2017, Memczak2013, Rybak2015, Salzman2013	0.0837845	1.05979	0.909521	0.990212	10.4641	10.3803	799.831	1700.08	370.753	1220.12	2528.83	2535.81	1657.49	1182.4	829.282	776.388
hsa_circ_0003247	chr1:155408117-155429689:-	ASH1L	circBase	844	2	21572	chr1:155385714-155408117|chr1:155429689-155447676	ENSG00000116539.12_3	ENST00000368346.7_1	NM_018489	Hs68_RNase, Hs68_control, Nhek, K562, Hsmm, Hepg2, H1hesc, Gm12878, Bj, Ag04450, Sknshra, diencephalon, Sy5y_exp1_D4, cerebellum, Sy5y_exp1_D0, occipital_lobe, frontal_cortex, Sy5y_exp1_D2, parietal_lobe, temporal_lobe, chondrocytes, WAS2, ada_scid, adipose, vena_cava, LCL, platelets	ANNOTATED, CDS, coding, INTERNAL, OVCODE, OVEXON	Jeck2013, Maass2017, Rybak2015, Salzman2013	-0.0782939	0.947177	0.913428	0.990212	9.71314	9.79143	1023.78	1096.83	417.098	1148.35	696.344	621.991	1211.24	1034.6	527.725	776.388
hsa_circ_0110887	chr1:155640110-155649303:-	YY1AP1	circBase	707	5	9193	chr1:155638568-155640110|chr1:155649303-155650206	ENSG00000163374.19_3	ENST00000368339.9_2	NM_139121	diencephalon, cerebellum, occipital_lobe, frontal_cortex, parietal_lobe, temporal_lobe	ANNOTATED, CDS, coding, INTERNAL, OVCODE, OVERLAPTX, OVEXON, UTR5	Rybak2015	0.257665	1.19554	0.717819	0.896665	8.94812	8.69046	255.946	520.994	231.721	287.087	732.994	382.764	254.998	221.7	829.282	776.388
hsa_circ_0003608	chr1:155644800-155649303:-	YY1AP1	circBase	390	3	4503	chr1:155642522-155644800|chr1:155649303-155650206	ENSG00000163374.19_3	ENST00000368339.9_2	NM_139121	Hs68_RNase, Hs68_control, diencephalon, cerebellum, Sy5y_exp1_D0, occipital_lobe, frontal_cortex, Sy5y_exp1_D2, parietal_lobe, temporal_lobe, SY5Y_exp2_D4	ANNOTATED, CDS, coding, INTERNAL, OVCODE, OVEXON, UTR5	Jeck2013, Rybak2015	-0.401011	0.757328	0.511547	0.77013	9.81253	10.2135	1183.75	1562.98	1529.36	789.49	842.943	813.373	1019.99	1108.5	904.671	621.11
hsa_circ_0014606	chr1:155646338-155649303:-	YY1AP1	circBase	303	2	2965	chr1:155644887-155646338|chr1:155649303-155650206	ENSG00000163374.19_3	ENST00000368339.9_2	NM_139121	K562, Gm12878, Ag04450, Sknshra, diencephalon, Sy5y_exp1_D4, cerebellum, Sy5y_exp1_D0, occipital_lobe, frontal_cortex, Sy5y_exp1_D2, parietal_lobe, temporal_lobe, SY5Y_exp2_D4, WAS2, adipose, vena_cava, neutophils, platelets	ANNOTATED, CDS, coding, INTERNAL, OVCODE, OVERLAPTX, OVEXON, UTR5	Maass2017, Rybak2015, Salzman2013	-1.02187	0.492478	0.142914	0.438316	8.27513	9.297	543.885	1124.25	787.851	358.859	293.197	239.227	382.497	443.399	226.168	232.916
hsa_circ_0014613	chr1:155691307-155695810:+	DAP3	circBase	304	3	4503	chr1:155679615-155691307|chr1:155695810-155697398	ENSG00000132676.15_4	ENST00000471642.6_1	NM_001199849	Nhek, K562, Hepg2, Helas3, H1hesc, Gm12878, Ag04450, A549, Sknshra, Mcf7, diencephalon, cerebellum, Sy5y_exp1_D0, occipital_lobe, frontal_cortex, parietal_lobe, temporal_lobe, platelets	ANNOTATED, CDS, coding, INTERNAL, OVCODE, OVEXON	Maass2017, Rybak2015, Salzman2013	-0.719924	0.60713	0.409053	0.703296	7.4061	8.12602	319.932	329.049	278.065	71.7719	366.497	239.227	254.998	73.8999	150.778	77.6388
hsa_circ_0014614	chr1:155695172-155695810:+	DAP3	circBase	202	2	638	chr1:155691409-155695172|chr1:155695810-155697398	ENSG00000132676.15_4	ENST00000471642.6_1	NM_001199849	Nhek, K562, Huvec, Hepg2, Helas3, H1hesc, Gm12878, Bj, Ag04450, A549, Sknshra, SY5Y_exp2_D0, diencephalon, Sy5y_exp1_D4, cerebellum, Sy5y_exp1_D0, occipital_lobe, frontal_cortex, Sy5y_exp1_D2, parietal_lobe, temporal_lobe, SY5Y_exp2_D4, WAS2, cortex, decidua, vena_cava, platelets	ANNOTATED, CDS, coding, INTERNAL, OVCODE, OVEXON	Maass2017, Rybak2015, Salzman2013	-1.05635	0.480848	0.139332	0.435011	8.24951	9.30585	703.851	712.939	556.13	753.605	403.147	95.691	509.995	221.7	452.335	232.916
hsa_circ_0000139	chr1:155823066-155823597:-	GON4L	circBase	531	1	531	chr1:155796819-155823066|chr1:155823597-155826937	ENSG00000116580.18_2	ENST00000368331.5_1	NM_001037533	HEK293, cd_34, Hs68_RNase, Hs68_control, Nhek, K562, H1hesc, Gm12878, Ag04450, A549, Sknshra, SY5Y_exp2_D0, diencephalon, Sy5y_exp1_D4, cerebellum, Sy5y_exp1_D0, occipital_lobe, frontal_cortex, Sy5y_exp1_D2, parietal_lobe, temporal_lobe, SY5Y_exp2_D4, chondrocytes, WAS2, cortex, adipose, vena_cava, muscle, HUAEC, fibroblasts, platelets	ANNOTATED, CDS, coding, INTERNAL, OVCODE, OVEXON, UTR5	Jeck2013, Maass2017, Memczak2013, Rybak2015, Salzman2013	0.647831	1.56681	0.304359	0.612036	9.86416	9.21633	415.912	1233.93	139.033	610.061	513.096	765.528	701.244	886.798	1130.84	1164.58
hsa_circ_0008339	chr1:155896466-155896947:-	KIAA0907	circBase	217	2	481	chr1:155895634-155896466|chr1:155896947-155899086	ENSG00000132680.10_3	ENST00000368321.7_1	NM_014949	Hs68_RNase, Hs68_control, K562, Huvec, Hepg2, Helas3, Gm12878, Bj, Ag04450, A549, Sknshra, Mcf7, diencephalon, cerebellum, occipital_lobe, frontal_cortex, parietal_lobe, temporal_lobe	ANNOTATED, CDS, coding, INTERNAL, OVCODE, OVEXON	Jeck2013, Rybak2015, Salzman2013	0.61369	1.53017	0.466675	0.741511	8.58378	7.97009	223.953	191.945	463.442	322.973	36.6497	287.073	764.993	443.399	0	388.194
hsa_circ_0004680	chr1:156303337-156304709:-	CCT3	circBase	211	3	1372	chr1:156294880-156303337|chr1:156304709-156305617	ENSG00000163468.14_2	ENST00000295688.7_1	NR_036564	Hs68_RNase, Hs68_control, Nhek, K562, Huvec, Hepg2, Helas3, H1hesc, Gm12878, Bj, Ag04450, A549, Sknshra, SY5Y_exp2_D0, diencephalon, cerebellum, Sy5y_exp1_D0, occipital_lobe, frontal_cortex, Sy5y_exp1_D2, parietal_lobe, temporal_lobe, SY5Y_exp2_D4, platelets	ANNOTATED, INTERNAL, ncRNA, OVCODE, OVEXON	Jeck2013, Maass2017, Rybak2015, Salzman2013	-0.905174	0.533968	0.305786	0.612997	7.92177	8.82694	95.9797	1453.3	231.721	251.202	183.248	382.764	254.998	73.8999	452.335	0
hsa_circ_0008661	chr1:160293220-160302347:-	COPA	circBase	320	3	9127	chr1:160283915-160293220|chr1:160302347-160303392	ENSG00000122218.14_2	ENST00000368069.7_1	NM_001098398	Hs68_RNase, Hs68_control, Nhek, K562, Hepg2, Helas3, H1hesc, Gm12878, Bj, Ag04450, A549, Sknshra, diencephalon, cerebellum, occipital_lobe, frontal_cortex, parietal_lobe, temporal_lobe, ada_scid, adipose, vena_cava, platelets	ANNOTATED, CDS, coding, INTERNAL, OVCODE, OVEXON	Jeck2013, Maass2017, Rybak2015, Salzman2013	0.0847404	1.0605	1	1	6.95355	6.86881	0	301.628	139.033	35.8859	73.2994	47.8455	318.747	221.7	0	0
hsa_circ_0000021	chr1:16044387-16047883:+	PLEKHM2	circBase	435	4	3496	chr1:16043311-16044387|chr1:16047883-16051811	ENSG00000116786.11_3	ENST00000375799.7_1	NM_015164	cd_19, neutr, Hs68_RNase, Hs68_control, Nhek, K562, Huvec, Hepg2, Helas3, H1hesc, Gm12878, Bj, Ag04450, A549, Nhlf, Sknshra, diencephalon, cerebellum, occipital_lobe, frontal_cortex, parietal_lobe, temporal_lobe	ANNOTATED, CDS, coding, INTERNAL, OVCODE, OVEXON	Jeck2013, Memczak2013, Rybak2015, Salzman2013	-0.818932	0.566861	0.536464	0.784327	6.45987	7.2788	95.9797	219.366	139.033	143.544	146.599	0	127.499	221.7	0	77.6388
hsa_circ_0010117	chr1:16263657-16264501:+	SPEN	circBase	678	2	844	chr1:16262761-16263657|chr1:16264501-16265212	ENSG00000065526.10_2	ENST00000375759.7_1	NM_015001	Nhek, Hepg2, Helas3, diencephalon, occipital_lobe, parietal_lobe	ANNOTATED, CDS, coding, INTERNAL, OVCODE, OVEXON	Rybak2015, Salzman2013	1.37565	2.59485	0.254956	0.578172	7.50539	6.12974	255.946	54.8414	0	0	0	47.8455	382.497	0	376.946	77.6388
hsa_circ_0111060	chr1:167301706-167307495:+	POU2F1	circBase	355	2	5789	chr1:167210847-167301706|chr1:167307495-167334703	ENSG00000143190.21_4	ENST00000367865.5_1	ENST00000367865.1	diencephalon, cerebellum, occipital_lobe, frontal_cortex, temporal_lobe	ANNOTATED, CDS, coding, INTERNAL, OVCODE, OVEXON, UTR5	Rybak2015	-1.39734	0.379628	0.121913	0.410969	6.78782	8.18516	415.912	520.994	185.377	143.544	146.599	287.073	191.248	0	0	0
hsa_circ_0000154	chr1:167921037-167944253:+	DCAF6	circBase	341	3	23216	chr1:167905350-167921037|chr1:167944253-167956732	ENSG00000143164.15_2	ENST00000450548.5_1	NM_001017977	HEK293, Hs68_RNase, Hs68_control, K562, Gm12878, Bj, Ag04450, A549, diencephalon, Sy5y_exp1_D4, cerebellum, occipital_lobe, frontal_cortex, parietal_lobe, platelets	ANNOTATED, CDS, coding, INTERNAL, OVCODE, OVEXON	Jeck2013, Maass2017, Memczak2013, Rybak2015, Salzman2013	-1.59266	0.33156	0.188879	0.510275	5.94526	7.53792	127.973	109.683	231.721	71.7719	366.497	0	0	295.599	0	0
hsa_circ_0009109	chr1:167935866-167944253:+	DCAF6	circBase	279	2	8387	chr1:167921099-167935866|chr1:167944253-167956732	ENSG00000143164.15_2	ENST00000450548.5_1	NM_001198956	Hs68_RNase, Hs68_control, Nhek, K562, Hsmm, Hepg2, Helas3, H1hesc, Gm12878, Bj, Ag04450, A549, Sknshra, diencephalon, cerebellum, occipital_lobe, frontal_cortex, parietal_lobe	ANNOTATED, CDS, coding, INTERNAL, OVCODE, OVEXON	Jeck2013, Rybak2015, Salzman2013	1.2029	2.30203	0.37096	0.669986	7.44877	6.24586	31.9932	164.524	0	107.658	36.6497	0	254.998	0	603.114	0
hsa_circ_0015211	chr1:171492359-171502100:+	PRRC2C	circBase	1040	5	9741	chr1:171491398-171492359|chr1:171502100-171504566	ENSG00000117523.15_3	ENST00000367742.7_1	NM_015172	Hepg2, diencephalon, occipital_lobe, frontal_cortex, platelets	ANNOTATED, CDS, coding, INTERNAL, OVCODE, OVEXON	Maass2017, Rybak2015, Salzman2013	-2.05782	0.240178	0.0256889	0.193944	6.2057	8.26352	287.939	246.786	324.409	358.859	293.197	287.073	0	0	0	0
hsa_circ_0004412	chr1:171537385-171544267:+	PRRC2C	circBase	397	3	6882	chr1:171535982-171537385|chr1:171544267-171546572	ENSG00000117523.15_3	ENST00000367742.7_1	NM_015172	Hs68_RNase, Hs68_control, Nhek, K562, Huvec, Hepg2, Helas3, H1hesc, Gm12878, Bj, Ag04450, A549, Sknshra, Mcf7, diencephalon, cerebellum, occipital_lobe, frontal_cortex, Sy5y_exp1_D2, parietal_lobe, temporal_lobe, platelets	ANNOTATED, CDS, coding, INTERNAL, OVCODE, OVEXON	Jeck2013, Maass2017, Rybak2015, Salzman2013	2.25538	4.7746	0.0242813	0.189983	8.38907	6.13369	0	219.366	92.6884	0	0	334.918	254.998	73.8999	753.892	232.916
hsa_circ_0141494	chr1:172011148-172017890:+	DNM3	circBase	343	3	6742	chr1:172007601-172011148|chr1:172017890-172037958	ENSG00000197959.13_3	ENST00000367733.6_1	NM_015569	platelets	ANNOTATED, CDS, coding, INTERNAL, OVCODE, OVEXON	Maass2017	-2.67595	0.15648	0.00848356	0.115401	5.69635	8.3723	319.932	658.097	463.442	71.7719	109.949	191.382	0	0	0	0
chr1:172100314-172222822:+	chr1:172100314-172222822:+	DNM3	CIRCexplorer2	224	2	122508	chr1:172062865-172100314|chr1:172222822-172277867	ENSG00000197959.13_3	ENST00000355305.9_1	NA	NA	NA	NA	-0.3986	0.758594	0.616661	0.838688	8.92361	9.32221	255.946	164.524	1622.05	143.544	1026.19	239.227	956.241	369.499	527.725	310.555
hsa_circ_0111165	chr1:172356272-172357949:+	DNM3	circBase	464	2	1677	chr1:172348322-172356272|chr1:172357949-172376911	ENSG00000197959.13_3	ENST00000355305.9_1	NM_015569	diencephalon, occipital_lobe, frontal_cortex, parietal_lobe, temporal_lobe	ANNOTATED, CDS, coding, INTERNAL, OVCODE, OVEXON	Rybak2015	-1.35652	0.390524	0.160212	0.466367	7.16284	8.51936	319.932	575.835	509.786	143.544	256.548	621.991	0	0	0	0
hsa_circ_0000160	chr1:172520651-172526934:+	C1orf9	circBase	559	4	6283	chr1:172502637-172520651|chr1:172526934-172538158	ENSG00000094975.13_2	ENST00000367723.8_1	NM_014283	cd_19, neutr, Hs68_RNase, Hs68_control, K562, H1hesc, Gm12878, Bj, Sknshra, Mcf7, diencephalon, Sy5y_exp1_D4, cerebellum, Sy5y_exp1_D0, occipital_lobe, frontal_cortex, Sy5y_exp1_D2, parietal_lobe, temporal_lobe, SY5Y_exp2_D4, osteocytes, adipose, neutophils, platelets	ANNOTATED, CDS, coding, INTERNAL, OVCODE, OVEXON	Jeck2013, Maass2017, Memczak2013, Rybak2015, Salzman2013	0.774099	1.71012	0.518488	0.773836	6.68691	5.91281	95.9797	54.8414	46.3442	0	73.2994	0	127.499	295.599	0	77.6388
hsa_circ_0015261	chr1:172520651-172560211:+	C1orf9	circBase	2719	16	39560	chr1:172502637-172520651|chr1:172560211-172569203	ENSG00000094975.13_2	ENST00000367723.8_1	NM_014283	K562, Ag04450, A549, SY5Y_exp2_D0, diencephalon, Sy5y_exp1_D4, cerebellum, occipital_lobe, frontal_cortex, Sy5y_exp1_D2, parietal_lobe, temporal_lobe, vena_cava, platelets	ANNOTATED, CDS, coding, INTERNAL, OVCODE, OVERLAPTX, OVEXON	Maass2017, Rybak2015, Salzman2013	2.96882	7.82896	0.0266592	0.195722	7.28388	4.31506	0	0	0	0	73.2994	47.8455	254.998	0	301.557	155.278
hsa_circ_0000007	chr1:1735857-1737977:-	GNB1	circBase	227	2	2120	chr1:1724750-1735857|chr1:1737977-1747194	ENSG00000078369.17_2	ENST00000610897.4_1	NM_002074	cd_19, Hs68_RNase, Hs68_control, Nhek, K562, Huvec, Hsmm, Hmec, Hepg2, Helas3, H1hesc, Gm12878, Bj, Ag04450, A549, Nhlf, Sknshra, Mcf7, diencephalon, Sy5y_exp1_D4, cerebellum, Sy5y_exp1_D0, occipital_lobe, frontal_cortex, parietal_lobe, temporal_lobe, decidua, platelets	ANNOTATED, CDS, coding, INTERNAL, OVCODE, OVEXON	Jeck2013, Maass2017, Memczak2013, Rybak2015, Salzman2013	2.83545	7.13767	0.0166301	0.160643	8.10429	5.26884	127.973	27.4207	0	0	0	0	318.747	665.099	150.778	232.916
hsa_circ_0009353	chr1:1735857-1749314:-	GNB1	circBase	373	4	13457	chr1:1724750-1735857|chr1:1749314-1756835	ENSG00000078369.17_2	ENST00000610897.4_1	NM_002074	Nhek, K562, Huvec, Hepg2, Helas3, H1hesc, Gm12878, Bj, Ag04450, A549, Sknshra, diencephalon, cerebellum, occipital_lobe, frontal_cortex, parietal_lobe, temporal_lobe, platelets	ANNOTATED, CDS, coding, INTERNAL, OVCODE, OVEXON	Maass2017, Rybak2015, Salzman2013	-0.203293	0.868566	0.831935	0.956818	7.72498	7.92828	159.966	54.8414	602.474	179.43	219.898	95.691	191.248	0	527.725	232.916
hsa_circ_0000008	chr1:1747194-1756938:-	GNB1	circBase	249	3	9744	chr1:1737977-1747194|chr1:1756938-1822258	ENSG00000078369.17_2	ENST00000610897.4_1	NM_002074	cd_19, Hs68_RNase, Hs68_control, Nhek, K562, Hepg2, Helas3, H1hesc, Gm12878, Bj, Ag04450, A549, Sknshra, SY5Y_exp2_D0, diencephalon, cerebellum, Sy5y_exp1_D0, occipital_lobe, frontal_cortex, Sy5y_exp1_D2, parietal_lobe, temporal_lobe, SY5Y_exp2_D4, platelets	ANNOTATED, CDS, coding, INTERNAL, OVCODE, OVEXON, UTR5	Jeck2013, Maass2017, Memczak2013, Rybak2015, Salzman2013	-1.44599	0.367041	0.262997	0.583384	5.95914	7.40512	95.9797	27.4207	463.442	215.316	36.6497	0	0	73.8999	226.168	0
hsa_circ_0003572	chr1:176050287-176105683:-	RFWD2	circBase	446	5	55396	chr1:176015460-176050287|chr1:176105683-176118141	ENSG00000143207.19_3	ENST00000367667.5_1	NM_022457	Hs68_RNase, Hs68_control, K562, Hepg2, Helas3, H1hesc, Gm12878, Bj, Ag04450, A549, Sknshra, SY5Y_exp2_D0, diencephalon, cerebellum, occipital_lobe, frontal_cortex, Sy5y_exp1_D2, parietal_lobe, temporal_lobe, platelets	ANNOTATED, CDS, coding, INTERNAL, OVCODE, OVEXON	Jeck2013, Maass2017, Rybak2015, Salzman2013	-0.849493	0.55498	0.381887	0.681251	7.12327	7.97276	319.932	274.207	231.721	251.202	146.599	287.073	191.248	0	0	155.278
hsa_circ_0004996	chr1:179100445-179102509:-	ABL2	circBase	234	2	2064	chr1:179095807-179100445|chr1:179102509-179198375	ENSG00000143322.19_2	ENST00000502732.5_1	NM_007314	Hs68_RNase, Hs68_control, Nhek, K562, Huvec, Hsmm, Hmec, Helas3, H1hesc, Gm12878, Bj, Ag04450, A549, Sknshra, Mcf7, diencephalon, Sy5y_exp1_D4, cerebellum, Sy5y_exp1_D0, occipital_lobe, frontal_cortex, Sy5y_exp1_D2, parietal_lobe, temporal_lobe, EPC, chondrocytes, adipose, vena_cava, muscle, HUAEC, platelets	ANNOTATED, CDS, coding, INTERNAL, OVCODE, OVEXON	Jeck2013, Maass2017, Rybak2015, Salzman2013	-0.278331	0.824544	0.756827	0.920099	8.53522	8.81355	895.81	575.835	370.753	0	366.497	239.227	828.743	369.499	226.168	155.278
hsa_circ_0003942	chr1:179972308-179975702:+	CEP350	circBase	228	2	3394	chr1:179966310-179972308|chr1:179975702-179981063	ENSG00000135837.15_3	ENST00000367607.7_2	NM_014810	Hs68_RNase, Hs68_control, K562, Hmec, Ag04450, diencephalon, Sy5y_exp1_D4, cerebellum, occipital_lobe, frontal_cortex, Sy5y_exp1_D2, parietal_lobe, temporal_lobe, WAS2, neutophils, platelets	ANNOTATED, CDS, coding, INTERNAL, OVCODE, OVEXON	Jeck2013, Maass2017, Rybak2015, Salzman2013	1.3548	2.55761	0.0958714	0.370594	8.86746	7.51267	95.9797	164.524	231.721	143.544	256.548	47.8455	637.494	665.099	829.282	155.278
hsa_circ_0009175	chr1:180366650-180382606:-	ACBD6	circBase	196	2	15956	chr1:180283857-180366650|chr1:180382606-180399314	ENSG00000230124.6_3	ENST00000496993.5_1	NM_032360	Hs68_RNase, Hs68_control, SY5Y_exp2_D0, diencephalon, cerebellum, Sy5y_exp1_D0, occipital_lobe, frontal_cortex, parietal_lobe, temporal_lobe, platelets	ANNOTATED, CDS, coding, INTERNAL, OVCODE, OVEXON	Jeck2013, Maass2017, Rybak2015	-0.806048	0.571946	0.536757	0.784327	6.98721	7.79325	223.953	164.524	0	502.403	183.248	95.691	0	517.299	0	0
hsa_circ_0007905	chr1:180953812-180962561:-	STX6	circBase	391	4	8749	chr1:180945782-180953812|chr1:180962561-180991774	ENSG00000135823.13_3	ENST00000542060.5_1	NM_005819	Hs68_RNase, Hs68_control, Nhek, K562, Huvec, Hepg2, Helas3, H1hesc, Gm12878, Bj, Ag04450, A549, Sknshra, Mcf7, SY5Y_exp2_D0, diencephalon, Sy5y_exp1_D4, cerebellum, Sy5y_exp1_D0, occipital_lobe, frontal_cortex, Sy5y_exp1_D2, parietal_lobe, temporal_lobe, SY5Y_exp2_D4, WAS2, LCL, placenta, platelets	ANNOTATED, CDS, coding, INTERNAL, OVCODE, OVEXON	Jeck2013, Maass2017, Rybak2015, Salzman2013	-1.12282	0.459197	0.0689423	0.324242	9.35897	10.4818	959.797	1316.19	2363.55	1184.24	1319.39	956.91	382.497	295.599	904.671	698.749
hsa_circ_0006796	chr1:180953812-180974599:-	STX6	circBase	656	6	20787	chr1:180945782-180953812|chr1:180974599-180991774	ENSG00000135823.13_3	ENST00000258301.5_1	NM_005819	Hs68_RNase, Hs68_control, diencephalon, Sy5y_exp1_D4, cerebellum, Sy5y_exp1_D0, occipital_lobe, frontal_cortex, Sy5y_exp1_D2, parietal_lobe, temporal_lobe, SY5Y_exp2_D4	ANNOTATED, CDS, coding, INTERNAL, OVCODE, OVEXON	Jeck2013, Rybak2015	0.925982	1.89998	0.270144	0.58858	8.65753	7.73155	383.919	191.945	46.3442	179.43	219.898	574.146	254.998	0	301.557	854.026
hsa_circ_0004689	chr1:185183638-185200840:+	SWT1	circBase	469	3	17202	chr1:185175895-185183638|chr1:185200840-185240454	ENSG00000116668.12_3	ENST00000367501.7_2	NM_017673	Hs68_RNase, Hs68_control, Nhek, K562, Gm12878, Sknshra, diencephalon, Sy5y_exp1_D4, cerebellum, Sy5y_exp1_D0, occipital_lobe, frontal_cortex, Sy5y_exp1_D2, parietal_lobe, temporal_lobe, adipose, vena_cava, muscle, platelets	ANNOTATED, CDS, coding, INTERNAL, OVCODE, OVEXON	Jeck2013, Maass2017, Rybak2015, Salzman2013	0.21212	1.15839	0.870233	0.972702	7.91	7.69788	159.966	191.945	185.377	107.658	366.497	191.382	446.246	73.8999	301.557	155.278
hsa_circ_0015839	chr1:200729966-200784772:+	CAMSAP2	circBase	506	3	54806	chr1:200709094-200729966|chr1:200784772-200801327	ENSG00000118200.14_3	ENST00000358823.6_1	NM_203459	Nhek, K562, H1hesc, Ag04450, diencephalon, cerebellum, occipital_lobe, frontal_cortex, Sy5y_exp1_D2, parietal_lobe, SY5Y_exp2_D8, temporal_lobe, SY5Y_exp2_D4, vena_cava	ANNOTATED, CDS, coding, INTERNAL, OVCODE, OVEXON	Maass2017, Rybak2015, Salzman2013	0.672949	1.59433	0.299978	0.608439	9.31987	8.64692	447.905	603.256	139.033	358.859	403.147	621.991	573.745	369.499	753.892	854.026
hsa_circ_0007167	chr1:203676136-203677232:+	ATP2B4	circBase	458	2	1096	chr1:203672941-203676136|chr1:203677232-203678428	ENSG00000058668.14_3	ENST00000357681.9_1	NM_001001396	Hs68_RNase, Hs68_control, Nhek, K562, Huvec, Hepg2, Helas3, H1hesc, Bj, Ag04450, Sknshra, diencephalon, cerebellum, occipital_lobe, frontal_cortex, parietal_lobe, temporal_lobe, cortex, vena_cava	ANNOTATED, CDS, coding, INTERNAL, OVCODE, OVEXON	Jeck2013, Maass2017, Rybak2015, Salzman2013	3.19443	9.15417	0.00225338	0.0581824	8.58223	5.38781	0	27.4207	92.6884	0	73.2994	191.382	127.499	295.599	527.725	776.388
hsa_circ_0004777	chr1:204082042-204083733:+	SOX13	circBase	419	3	1691	chr1:204042839-204082042|chr1:204083733-204085634	ENSG00000143842.14_3	ENST00000367203.8_1	NM_005686	Hs68_RNase, Hs68_control, Huvec, Helas3, H1hesc, Sknshra, diencephalon, cerebellum, occipital_lobe, frontal_cortex, parietal_lobe, temporal_lobe	ANNOTATED, CDS, coding, INTERNAL, OVCODE, OVEXON, UTR5	Jeck2013, Rybak2015, Salzman2013	2.45789	5.49412	0.0118236	0.140243	8.57809	6.12021	63.9865	164.524	0	0	73.2994	143.536	382.497	295.599	75.3892	1009.3
hsa_circ_0111758	chr1:204970297-204971876:+	NFASC	circBase	270	2	1579	chr1:204966534-204970297|chr1:204971876-204978684	ENSG00000163531.15_3	ENST00000339876.10_1	ENST00000367172.4	diencephalon, cerebellum, occipital_lobe, frontal_cortex, parietal_lobe, temporal_lobe	ANNOTATED, CDS, coding, INTERNAL, OVCODE, OVEXON	Rybak2015	-1.30035	0.406029	0.258654	0.581053	7.63319	8.93354	63.9865	82.2622	463.442	861.262	952.892	909.064	0	0	0	0
hsa_circ_0000175	chr1:205585605-205593019:-	ELK4	circBase	1373	4	7414	chr1:205572481-205585605|chr1:205593019-205600759	ENSG00000158711.13_2	ENST00000616704.4_1	NM_021795	cd_19, SY5Y_exp2_D0, Sy5y_exp1_D4, Sy5y_exp1_D0, Sy5y_exp1_D2, parietal_lobe, SY5Y_exp2_D8, temporal_lobe, EPC, WAS2, ada_scid, adipose, decidua, vena_cava, right_atrium, platelets	ALT_DONOR, CDS, coding, downstream_end, UTR3, UTR5	Maass2017, Memczak2013, Rybak2015	-0.450944	0.731564	0.529704	0.78154	9.02742	9.47837	703.851	411.311	1436.67	502.403	513.096	574.146	191.248	517.299	376.946	931.665
hsa_circ_0008182	chr1:206566045-206567030:+	SRGAP2	circBase	345	2	985	chr1:206557431-206566045|chr1:206567030-206574779	ENSG00000163486.8	ENST00000295713.5	NM_015326	Hs68_RNase, Hs68_control, K562, Huvec, Hepg2, Helas3, H1hesc, Bj, A549, Sknshra, frontal_cortex	ANNOTATED, CDS, coding, INTERNAL, OVCODE, OVEXON	Jeck2013, Rybak2015, Salzman2013	-3.27685	0.103174	0.00666446	0.10304	5.41154	8.68839	959.797	932.304	46.3442	35.8859	36.6497	95.691	0	73.8999	0	0
hsa_circ_0016334	chr1:210186977-210194599:+	SYT14	circBase	381	2	7622	chr1:210126101-210186977|chr1:210194599-210267666	ENSG00000143469.18_4	ENST00000367019.5_4	NR_027458	Ag04450, Sknshra, SY5Y_exp2_D0, diencephalon, Sy5y_exp1_D4, cerebellum, Sy5y_exp1_D0, occipital_lobe, frontal_cortex, parietal_lobe, temporal_lobe	ANNOTATED, INTERNAL, ncRNA, OVCODE, OVEXON	Rybak2015, Salzman2013	-3.69039	0.0774606	0.00134057	0.0449528	5.02216	8.71255	511.892	932.304	278.065	179.43	146.599	0	63.7494	0	0	77.6388
hsa_circ_0000023	chr1:21076215-21100103:-	HP1BP3	circBase	791	6	23888	chr1:21074148-21076215|chr1:21100103-21103089	ENSG00000127483.17_3	ENST00000312239.9_1	NM_016287	cd_19, Hs68_RNase, Hs68_control, K562, Hepg2, Ag04450, diencephalon, Sy5y_exp1_D4, cerebellum, Sy5y_exp1_D0, occipital_lobe, frontal_cortex, Sy5y_exp1_D2, parietal_lobe, temporal_lobe, platelets	ANNOTATED, CDS, coding, INTERNAL, OVCODE, OVEXON	Jeck2013, Maass2017, Memczak2013, Rybak2015, Salzman2013	0.493107	1.40747	0.569752	0.805654	8.15499	7.66189	255.946	301.628	278.065	35.8859	109.949	287.073	637.494	73.8999	301.557	77.6388
hsa_circ_0000024	chr1:21083658-21100103:-	HP1BP3	circBase	631	5	16445	chr1:21076375-21083658|chr1:21100103-21103089	ENSG00000127483.17_3	ENST00000312239.9_1	NM_016287	cd_19, neutr, Hs68_RNase, Hs68_control, Gm12878, Ag04450, diencephalon, Sy5y_exp1_D4, cerebellum, Sy5y_exp1_D0, occipital_lobe, frontal_cortex, Sy5y_exp1_D2, parietal_lobe, SY5Y_exp2_D8, temporal_lobe, SY5Y_exp2_D4, platelets	ANNOTATED, CDS, coding, INTERNAL, OVCODE, OVEXON	Jeck2013, Maass2017, Memczak2013, Rybak2015, Salzman2013	-0.80426	0.572656	0.312179	0.620181	7.99989	8.80415	415.912	191.945	1158.6	107.658	366.497	191.382	382.497	369.499	75.3892	232.916
hsa_circ_0004493	chr1:21083658-21103243:-	HP1BP3	circBase	785	6	19585	chr1:21076375-21083658|chr1:21103243-21106304	ENSG00000127483.17_3	ENST00000312239.9_1	NM_016287	Hs68_RNase, Hs68_control, diencephalon, Sy5y_exp1_D4, cerebellum, occipital_lobe, frontal_cortex, parietal_lobe, temporal_lobe	ANNOTATED, CDS, coding, INTERNAL, OVCODE, OVEXON	Jeck2013, Rybak2015	-0.196835	0.872462	0.905564	0.990212	7.93204	8.12888	191.959	740.359	92.6884	287.087	36.6497	47.8455	254.998	369.499	0	543.471
hsa_circ_0002238	chr1:21091869-21100103:-	HP1BP3	circBase	540	4	8234	chr1:21083749-21091869|chr1:21100103-21103089	ENSG00000127483.17_3	ENST00000312239.9_1	NM_016287	Hs68_RNase, Hs68_control, K562, Hepg2, diencephalon, Sy5y_exp1_D4, cerebellum, occipital_lobe, frontal_cortex, parietal_lobe, temporal_lobe	ANNOTATED, CDS, coding, INTERNAL, OVCODE, OVEXON	Jeck2013, Rybak2015, Salzman2013	-0.989535	0.50364	0.329913	0.631456	6.74399	7.73353	127.973	137.104	463.442	143.544	183.248	191.382	0	0	150.778	155.278
hsa_circ_0005782	chr1:21097422-21100103:-	HP1BP3	circBase	304	2	2681	chr1:21094157-21097422|chr1:21100103-21103089	ENSG00000127483.17_3	ENST00000312239.9_1	NM_016287	Hs68_RNase, Hs68_control, Nhek, K562, Gm12878, Ag04450, Sknshra, diencephalon, cerebellum, Sy5y_exp1_D0, occipital_lobe, frontal_cortex, parietal_lobe, SY5Y_exp2_D8, temporal_lobe, adipose, vena_cava, platelets	ANNOTATED, CDS, coding, INTERNAL, OVCODE, OVEXON	Jeck2013, Maass2017, Rybak2015, Salzman2013	0.390224	1.3106	0.718698	0.896888	8.33539	7.94517	31.9932	850.042	231.721	71.7719	0	0	254.998	443.399	527.725	388.194
hsa_circ_0111832	chr1:211192205-211264032:-	KCNH1	circBase	641	3	71827	chr1:211093411-211192205|chr1:211264032-211276837	ENSG00000143473.12_3	ENST00000367007.5_2	NM_002238	diencephalon, cerebellum, frontal_cortex, temporal_lobe	ANNOTATED, CDS, coding, INTERNAL, OVCODE, OVERLAPTX, OVEXON	Rybak2015	-0.411672	0.751752	0.689523	0.881797	7.8402	8.25187	255.946	54.8414	509.786	466.517	219.898	1052.6	0	0	0	0
hsa_circ_0111833	chr1:211256121-211264032:-	KCNH1	circBase	248	2	7911	chr1:211192598-211256121|chr1:211264032-211276837	ENSG00000143473.12_3	ENST00000367007.5_2	NM_172362	diencephalon, frontal_cortex	ANNOTATED, CDS, coding, INTERNAL, OVCODE, OVEXON	Rybak2015	-2.98965	0.1259	0.00289573	0.0647629	5.36432	8.35397	63.9865	274.207	556.13	251.202	476.446	143.536	0	0	0	0
hsa_circ_0007234	chr1:211526580-211527809:+	TRAF5	circBase	277	2	1229	chr1:211500015-211526580|chr1:211527809-211529708	ENSG00000082512.14_2	ENST00000462410.5_1	NM_001033910	Hs68_RNase, Hs68_control, Nhek, K562, Huvec, Hepg2, Helas3, H1hesc, Gm12878, Bj, Ag04450, A549, Nhlf, Sknshra, Mcf7, diencephalon, cerebellum, occipital_lobe, frontal_cortex, parietal_lobe, temporal_lobe, WAS2, decidua	ANNOTATED, CDS, coding, INTERNAL, OVCODE, OVEXON, UTR5	Jeck2013, Maass2017, Rybak2015, Salzman2013	2.41753	5.34256	0.114871	0.401347	7.5194	5.10187	0	0	0	71.7719	73.2994	143.536	0	0	753.892	0
hsa_circ_0002274	chr1:211952259-211966532:-	LPGAT1	circBase	616	4	14273	chr1:211924409-211952259|chr1:211966532-212002400	ENSG00000123684.12_2	ENST00000366997.8_1	NM_014873	Hs68_RNase, Hs68_control, K562, Gm12878, Ag04450, A549, Sknshra, diencephalon, Sy5y_exp1_D4, cerebellum, Sy5y_exp1_D0, occipital_lobe, frontal_cortex, Sy5y_exp1_D2, parietal_lobe, temporal_lobe, WAS2	ANNOTATED, CDS, coding, INTERNAL, OVCODE, OVEXON	Jeck2013, Maass2017, Rybak2015, Salzman2013	-2.28218	0.205587	0.0068136	0.103736	7.29081	9.57299	543.885	219.366	1853.77	717.719	476.446	478.455	0	147.8	0	77.6388
hsa_circ_0010467	chr1:21220009-21268823:-	EIF4G3	circBase	1430	5	48814	chr1:21212864-21220009|chr1:21268823-21276495	ENSG00000075151.20_3	ENST00000264211.12_1	NM_001198801	Nhek, K562, Hepg2, Helas3, H1hesc, Ag04450, A549, Sknshra, diencephalon, cerebellum, occipital_lobe, frontal_cortex, parietal_lobe, temporal_lobe	ANNOTATED, CDS, coding, INTERNAL, OVCODE, OVEXON	Rybak2015, Salzman2013	-0.554831	0.680737	0.486914	0.755888	8.5752	9.13004	383.919	438.731	463.442	610.061	879.592	956.91	701.244	73.8999	0	77.6388
hsa_circ_0111887	chr1:21231375-21268823:-	EIF4G3	circBase	929	2	37448	chr1:21226436-21231375|chr1:21268823-21276495	ENSG00000075151.20_3	ENST00000264211.12_1	NM_001198801	diencephalon, cerebellum, occipital_lobe, frontal_cortex, parietal_lobe, temporal_lobe	ANNOTATED, CDS, coding, INTERNAL, OVCODE, OVEXON	Rybak2015	-0.671464	0.627869	0.369916	0.669412	8.4686	9.14006	575.878	493.573	787.851	466.517	476.446	1052.6	382.497	0	75.3892	155.278
hsa_circ_0000025	chr1:21295966-21307720:-	EIF4G3	circBase	516	4	11754	chr1:21276604-21295966|chr1:21307720-21329205	ENSG00000075151.20_3	ENST00000374935.7_1	NM_001198802	HEK293, Hs68_RNase, Hs68_control, K562, Helas3, H1hesc, Bj, Ag04450, Sknshra, diencephalon, cerebellum, occipital_lobe, frontal_cortex, Sy5y_exp1_D2, parietal_lobe, temporal_lobe, platelets	ANNOTATED, CDS, coding, INTERNAL, OVCODE, OVEXON	Jeck2013, Maass2017, Memczak2013, Rybak2015, Salzman2013	1.88882	3.70333	0.0204614	0.175973	9.26015	7.37133	31.9932	27.4207	370.753	107.658	293.197	334.918	892.492	517.299	452.335	854.026
hsa_circ_0005604	chr1:21295966-21329301:-	EIF4G3	circBase	612	5	33335	chr1:21276604-21295966|chr1:21329301-21377358	ENSG00000075151.20_3	ENST00000374935.7_1	NM_001198803	Hs68_RNase, Hs68_control, Nhek, Hepg2, H1hesc, diencephalon, cerebellum, occipital_lobe, frontal_cortex, parietal_lobe, cortex	ANNOTATED, CDS, coding, INTERNAL, OVCODE, OVEXON, UTR5	Jeck2013, Maass2017, Rybak2015, Salzman2013	0.478751	1.39354	0.62428	0.839981	8.23363	7.75488	159.966	27.4207	185.377	287.087	403.147	430.609	127.499	147.8	452.335	310.555
hsa_circ_0004849	chr1:213251037-213290752:+	RPS6KC1	circBase	331	3	39715	chr1:213246328-213251037|chr1:213290752-213302869	ENSG00000136643.11_2	ENST00000543470.5_1	NM_012424	Hs68_RNase, Hs68_control, K562, Ag04450, A549, diencephalon, Sy5y_exp1_D4, cerebellum, Sy5y_exp1_D0, occipital_lobe, frontal_cortex, Sy5y_exp1_D2, parietal_lobe, temporal_lobe, decidua, platelets	ANNOTATED, CDS, coding, INTERNAL, OVCODE, OVEXON	Jeck2013, Maass2017, Rybak2015, Salzman2013	0.589071	1.50428	0.421671	0.70841	9.14392	8.55485	255.946	329.049	139.033	717.719	403.147	717.682	701.244	221.7	829.282	310.555
hsa_circ_0111924	chr1:213251037-213341316:+	RPS6KC1	circBase	810	5	90279	chr1:213246328-213251037|chr1:213341316-213403839	ENSG00000136643.11_2	ENST00000543470.5_1	ENST00000366960.3	diencephalon, cerebellum, occipital_lobe, frontal_cortex, parietal_lobe, temporal_lobe	ANNOTATED, CDS, coding, INTERNAL, OVCODE, OVERLAPTX, OVEXON	Rybak2015	-1.45173	0.365583	0.249589	0.576936	6.32888	7.78061	95.9797	0	0	645.947	329.847	334.918	0	0	0	0
hsa_circ_0111925	chr1:213251037-213349835:+	RPS6KC1	circBase	903	6	98798	chr1:213244383-213251037|chr1:213349835-213414044	ENSG00000136643.11_2	ENST00000615329.4_1	ENST00000366960.3	diencephalon, cerebellum, occipital_lobe, frontal_cortex, parietal_lobe, temporal_lobe	ANNOTATED, CDS, coding, INTERNAL, OVCODE, OVERLAPTX, OVEXON	Rybak2015	-1.58989	0.332196	0.140753	0.435759	7.11836	8.70825	63.9865	0	231.721	1040.69	732.994	478.455	0	147.8	0	0
hsa_circ_0008071	chr1:21327691-21329301:-	EIF4G3	circBase	210	2	1610	chr1:21307720-21327691|chr1:21329301-21415630	ENSG00000075151.20_3	ENST00000411888.5_1	NM_001198801	Hs68_RNase, Hs68_control, diencephalon, cerebellum, occipital_lobe, frontal_cortex, Sy5y_exp1_D2, parietal_lobe, temporal_lobe, chondrocytes, platelets	ALT_DONOR, CDS, coding, INTERNAL, intronic, OVCODE, OVEXON, UTR5	Jeck2013, Maass2017, Rybak2015	1.80573	3.49607	0.101594	0.376127	7.56941	5.76367	0	109.683	139.033	0	0	191.382	127.499	147.8	301.557	155.278
hsa_circ_0007772	chr1:213302869-213349835:+	RPS6KC1	circBase	572	3	46966	chr1:213290752-213302869|chr1:213349835-213403839	ENSG00000136643.11_2	ENST00000543354.5_1	NM_012424	Hs68_RNase, Hs68_control, K562, Hepg2, Helas3, H1hesc, Ag04450, Sknshra, diencephalon, cerebellum, occipital_lobe, frontal_cortex, parietal_lobe	ANNOTATED, CDS, coding, INTERNAL, OVCODE, OVEXON	Jeck2013, Rybak2015, Salzman2013	-0.251318	0.840129	0.770978	0.927469	7.87685	8.12817	0	54.8414	278.065	645.947	403.147	669.837	127.499	0	150.778	155.278
hsa_circ_0005075	chr1:21377358-21415706:-	EIF4G3	circBase	205	2	38348	chr1:21329301-21377358|chr1:21415706-21502667	ENSG00000075151.20_3	ENST00000374935.7_1	NM_001198801	Hs68_RNase, Hs68_control, K562, Huvec, Hsmm, Hepg2, Helas3, H1hesc, Bj, Ag04450, A549, Nhlf, Sknshra, Mcf7, diencephalon, cerebellum, occipital_lobe, frontal_cortex, Sy5y_exp1_D2, parietal_lobe, temporal_lobe, chondrocytes, platelets	ANNOTATED, coding, INTERNAL, OVEXON, UTR5	Jeck2013, Maass2017, Rybak2015, Salzman2013	2.05472	4.15462	0.096174	0.370629	7.88257	5.82785	0	0	46.3442	215.316	0	0	701.244	147.8	150.778	155.278
hsa_circ_0000026	chr1:21377358-21437876:-	EIF4G3	circBase	266	3	60518	chr1:21329301-21377358|chr1:21437876-21494453	ENSG00000075151.20_3	ENST00000356916.7_1	NM_001198803	HEK293, Hs68_RNase, Hs68_control, Nhek, K562, Hepg2, Helas3, H1hesc, Gm12878, Bj, Ag04450, A549, Sknshra, Mcf7, diencephalon, cerebellum, occipital_lobe, frontal_cortex, parietal_lobe, temporal_lobe, platelets	ANNOTATED, coding, INTERNAL, OVEXON, UTR5	Jeck2013, Maass2017, Memczak2013, Rybak2015, Salzman2013	0.839338	1.78923	0.308682	0.617225	8.2216	7.38226	223.953	82.2622	139.033	179.43	183.248	95.691	764.993	147.8	301.557	155.278
hsa_circ_0005735	chr1:21415630-21437876:-	EIF4G3	circBase	137	2	22246	chr1:21377487-21415630|chr1:21437876-21494453	ENSG00000075151.20_3	ENST00000356916.7_1	NM_001198803	Hs68_RNase, Hs68_control, Nhek, K562, Huvec, Hsmm, Hepg2, Helas3, H1hesc, Gm12878, Bj, Ag04450, A549, Nhlf, Sknshra, Mcf7, diencephalon, cerebellum, Sy5y_exp1_D0, occipital_lobe, frontal_cortex, parietal_lobe, temporal_lobe, platelets	ANNOTATED, coding, INTERNAL, OVEXON, UTR5	Jeck2013, Maass2017, Rybak2015, Salzman2013	1.74472	3.35129	0.0528511	0.282529	8.13275	6.38803	31.9932	54.8414	92.6884	71.7719	146.599	143.536	127.499	517.299	301.557	310.555
hsa_circ_0111952	chr1:214169811-214185058:+	PROX1	circBase	2095	3	15247	chr1:214161826-214169811|chr1:214185058-214208991	ENSG00000117707.15_3	ENST00000498508.6_1	ENST00000498508.2	SY5Y_exp2_D0, diencephalon, Sy5y_exp1_D0, Sy5y_exp1_D2	ANNOTATED, CDS, coding, INTERNAL, OVCODE, OVERLAPTX, OVEXON, UTR5	Rybak2015	-0.995253	0.501648	0.353389	0.652217	6.78245	7.77771	287.939	246.786	278.065	0	256.548	95.691	191.248	0	0	232.916
hsa_circ_0008788	chr1:215342541-215345526:+	KCNK2	circBase	348	2	2985	chr1:215260021-215342541|chr1:215345526-215368295	ENSG00000082482.13_3	ENST00000486921.5_1	NM_001017424	Hs68_RNase, Hs68_control, H1hesc, Bj, Ag04450, Nhlf, Sknshra, diencephalon, cerebellum, occipital_lobe, frontal_cortex, parietal_lobe, temporal_lobe	ANNOTATED, CDS, coding, INTERNAL, OVCODE, OVEXON	Jeck2013, Rybak2015, Salzman2013	-0.749379	0.59486	0.646327	0.852307	6.15078	6.90016	0	27.4207	0	358.859	183.248	95.691	0	0	0	232.916
hsa_circ_0000184	chr1:215749243-215752480:+	KCTD3	circBase	352	4	3237	chr1:215747461-215749243|chr1:215752480-215753251	ENSG00000136636.12_3	ENST00000259154.8_1	NM_016121	cd_34, Hs68_RNase, Hs68_control, Nhek, K562, Helas3, H1hesc, Gm12878, Bj, Ag04450, diencephalon, cerebellum, occipital_lobe, frontal_cortex, parietal_lobe, temporal_lobe, platelets	ANNOTATED, CDS, coding, INTERNAL, OVCODE, OVEXON	Jeck2013, Maass2017, Memczak2013, Rybak2015, Salzman2013	-0.378803	0.769076	0.839853	0.959438	6.9948	7.3736	191.959	356.469	92.6884	143.544	0	95.691	0	295.599	75.3892	155.278
hsa_circ_0005521	chr1:215759837-215768813:+	KCTD3	circBase	307	2	8976	chr1:215753342-215759837|chr1:215768813-215775208	ENSG00000136636.12_3	ENST00000259154.8_1	NM_016121	Hs68_RNase, Hs68_control, K562, Ag04450, A549, Sknshra, diencephalon, cerebellum, occipital_lobe, frontal_cortex, parietal_lobe, temporal_lobe	ANNOTATED, CDS, coding, INTERNAL, OVCODE, OVEXON	Jeck2013, Rybak2015, Salzman2013	0.945387	1.92571	0.300848	0.609141	8.44847	7.50308	223.953	191.945	324.409	71.7719	73.2994	47.8455	127.499	443.399	980.06	155.278
hsa_circ_0002402	chr1:21599191-21616649:-	ECE1	circBase	442	3	17458	chr1:21586885-21599191|chr1:21616649-21671868	ENSG00000117298.14_2	ENST00000415912.6_1	NM_001113348	Hs68_RNase, Hs68_control, Nhek, K562, Huvec, Hepg2, Helas3, H1hesc, Gm12878, Bj, Ag04450, A549, Sknshra, diencephalon, cerebellum, occipital_lobe, frontal_cortex, Sy5y_exp1_D2, parietal_lobe, temporal_lobe	ANNOTATED, CDS, coding, INTERNAL, OVCODE, OVEXON	Jeck2013, Rybak2015, Salzman2013	-1.00525	0.498182	0.398343	0.69432	6.28799	7.29324	0	0	185.377	251.202	329.847	191.382	0	0	0	155.278
hsa_circ_0010523	chr1:22007300-22021714:-	USP48	circBase	358	4	14414	chr1:22005932-22007300|chr1:22021714-22027990	ENSG00000090686.15_2	ENST00000308271.13_1	NM_032236	K562, Huvec, Hepg2, H1hesc, Gm12878, Bj, Ag04450, A549, Sknshra, diencephalon, occipital_lobe, frontal_cortex, temporal_lobe	ANNOTATED, CDS, coding, INTERNAL, OVCODE, OVERLAPTX, OVEXON	Rybak2015, Salzman2013	0.640969	1.55938	0.531652	0.781641	7.48965	6.84868	0	54.8414	139.033	35.8859	329.847	95.691	254.998	221.7	226.168	77.6388
hsa_circ_0000028	chr1:22041881-22048257:-	USP48	circBase	315	3	6376	chr1:22033361-22041881|chr1:22048257-22050390	ENSG00000090686.15_2	ENST00000400301.5_2	NM_032236	cd_19, Hs68_RNase, Hs68_control, diencephalon, cerebellum, occipital_lobe, frontal_cortex, Sy5y_exp1_D2, parietal_lobe, temporal_lobe, WAS2, platelets	ANNOTATED, CDS, coding, INTERNAL, OVCODE, OVEXON	Jeck2013, Maass2017, Memczak2013, Rybak2015	-0.194066	0.874139	0.893695	0.985051	7.77662	7.97068	191.959	191.945	185.377	71.7719	586.395	47.8455	63.7494	443.399	0	543.471
hsa_circ_0112054	chr1:22041881-22050588:-	USP48	circBase	513	4	8707	chr1:22033361-22041881|chr1:22050588-22055062	ENSG00000090686.15_2	ENST00000400301.5_2	ENST00000308271.9	diencephalon, cerebellum, occipital_lobe, frontal_cortex, parietal_lobe, temporal_lobe	ANNOTATED, CDS, coding, INTERNAL, OVCODE, OVEXON	Rybak2015	-1.72315	0.302887	0.0638178	0.310549	6.72911	8.45225	95.9797	164.524	648.819	287.087	549.745	191.382	63.7494	73.8999	0	155.278
hsa_circ_0003413	chr1:222897433-222898897:+	BROX	circBase	179	2	1464	chr1:222895856-222897433|chr1:222898897-222900509	ENSG00000162819.11_3	ENST00000340934.9_1	NM_144695	Hs68_RNase, Hs68_control, K562, Gm12878, Bj, diencephalon, Sy5y_exp1_D4, cerebellum, Sy5y_exp1_D0, occipital_lobe, frontal_cortex, parietal_lobe, temporal_lobe, chondrocytes, adipose, platelets	ANNOTATED, CDS, coding, INTERNAL, OVCODE, OVEXON	Jeck2013, Maass2017, Rybak2015, Salzman2013	0.402618	1.3219	0.584526	0.815368	8.94483	8.54221	415.912	493.573	0	574.175	329.847	287.073	509.995	886.798	301.557	465.833
hsa_circ_0001978	chr1:224142178-224149975:-	TCONS_l2_00001804	circBase	676	4	7797	chr1:224140144-224142178|chr1:224149975-224161683	ENSG00000272645.3_3	ENST00000634905.1_2	TCONS_l2_00001804	Hs68_RNase, Hs68_control	ALT_ACCEPTOR, ncRNA, OVEXON, upstream_start	Jeck2013	1.59327	3.01732	0.202831	0.528386	7.62607	6.0328	0	0	92.6884	143.544	73.2994	143.536	509.995	295.599	0	0
hsa_circ_0016600	chr1:225140371-225161855:+	DNAH14	circBase	863	7	21484	chr1:225117537-225140371|chr1:225161855-225190484	ENSG00000185842.15_2	ENST00000430092.5_1	NM_001373	K562, A549, Sknshra, SY5Y_exp2_D0, diencephalon, Sy5y_exp1_D4, cerebellum, Sy5y_exp1_D0, occipital_lobe, frontal_cortex, Sy5y_exp1_D2, parietal_lobe, SY5Y_exp2_D8, temporal_lobe, SY5Y_exp2_D4, platelets	ANNOTATED, CDS, coding, INTERNAL, OVCODE, OVEXON, UTR5	Maass2017, Rybak2015, Salzman2013	1.59055	3.01164	0.341381	0.642599	6.6205	5.02995	31.9932	54.8414	46.3442	0	0	95.691	0	295.599	75.3892	0
hsa_circ_0016601	chr1:225140371-225195246:+	DNAH14	circBase	1140	9	54875	chr1:225117537-225140371|chr1:225195246-225211316	ENSG00000185842.15_2	ENST00000430092.5_1	NM_001373	Nhek, K562, Hepg2, Helas3, H1hesc, Ag04450, Sknshra, SY5Y_exp2_D0, diencephalon, Sy5y_exp1_D4, cerebellum, Sy5y_exp1_D0, occipital_lobe, frontal_cortex, Sy5y_exp1_D2, parietal_lobe, SY5Y_exp2_D8, temporal_lobe, SY5Y_exp2_D4, osteocytes, adipose, platelets	ANNOTATED, CDS, coding, INTERNAL, OVCODE, OVEXON, UTR5	Maass2017, Rybak2015, Salzman2013	2.5033	5.66979	0.0864512	0.356976	7.5964	5.0931	0	0	0	143.544	0	191.382	0	443.399	0	310.555
hsa_circ_0016733	chr1:227192694-227204751:-	CDC42BPA	circBase	360	3	12057	chr1:227182681-227192694|chr1:227204751-227210963	ENSG00000143776.18_3	ENST00000366767.7_1	NM_003607	K562, Helas3, H1hesc, A549, Sknshra, diencephalon, cerebellum, occipital_lobe, frontal_cortex, parietal_lobe, temporal_lobe	ANNOTATED, CDS, coding, INTERNAL, OVCODE, OVEXON	Rybak2015, Salzman2013	2.17147	4.50481	0.0303409	0.210683	8.66754	6.49607	63.9865	0	0	358.859	0	95.691	701.244	295.599	150.778	776.388
hsa_circ_0016754	chr1:227381486-227441856:-	CDC42BPA	circBase	421	4	60370	chr1:227348337-227381486|chr1:227441856-227504705	ENSG00000143776.18_3	ENST00000366767.7_1	NM_003607	K562, Helas3, Sknshra, diencephalon, cerebellum, occipital_lobe, frontal_cortex, parietal_lobe, temporal_lobe, WAS2, cortex, platelets	ANNOTATED, CDS, coding, INTERNAL, OVCODE, OVERLAPTX, OVEXON	Maass2017, Rybak2015, Salzman2013	-1.02031	0.49301	0.341589	0.642599	6.8604	7.88071	31.9932	54.8414	278.065	502.403	293.197	430.609	0	0	75.3892	0
hsa_circ_0016866	chr1:230798886-230800333:+	COG2	circBase	185	2	1447	chr1:230796569-230798886|chr1:230800333-230804421	ENSG00000135775.13_2	ENST00000494371.5_1	NM_007357	K562, H1hesc, Gm12878, SY5Y_exp2_D0, diencephalon, cerebellum, Sy5y_exp1_D0, occipital_lobe, frontal_cortex, Sy5y_exp1_D2, parietal_lobe, temporal_lobe, platelets	ANNOTATED, CDS, coding, INTERNAL, OVCODE, OVEXON	Maass2017, Rybak2015, Salzman2013	-0.972762	0.50953	0.264825	0.585315	8.03494	9.0077	831.824	767.78	463.442	179.43	293.197	95.691	1019.99	0	150.778	0
hsa_circ_0016867	chr1:230798886-230807386:+	COG2	circBase	2775	5	8500	chr1:230796569-230798886|chr1:230807386-230810743	ENSG00000135775.13_2	ENST00000494371.5_1	NM_007357	K562, H1hesc, Gm12878, Bj, Ag04450, Sknshra, SY5Y_exp2_D0, diencephalon, cerebellum, Sy5y_exp1_D0, occipital_lobe, frontal_cortex, parietal_lobe, temporal_lobe, vena_cava	ANNOTATED, CDS, coding, INTERNAL, OVCODE, OVEXON	Maass2017, Rybak2015, Salzman2013	-0.0596258	0.959513	1	1	8.30317	8.36279	415.912	329.049	139.033	466.517	256.548	621.991	0	443.399	150.778	310.555
hsa_circ_0016868	chr1:230798886-230810870:+	COG2	circBase	2902	6	11984	chr1:230796569-230798886|chr1:230810870-230814658	ENSG00000135775.13_2	ENST00000494371.5_1	NM_007357	Nhek, K562, Gm12878, A549, diencephalon, cerebellum, Sy5y_exp1_D0, occipital_lobe, frontal_cortex, Sy5y_exp1_D2, parietal_lobe, temporal_lobe	ANNOTATED, CDS, coding, INTERNAL, OVCODE, OVEXON	Rybak2015, Salzman2013	-1.86037	0.275405	0.0207077	0.176554	7.37569	9.23606	959.797	658.097	602.474	430.631	329.847	287.073	254.998	0	226.168	0
hsa_circ_0000195	chr1:231090078-231097049:-	TTC13	circBase	242	3	6971	chr1:231081200-231090078|chr1:231097049-231114305	ENSG00000143643.12_3	ENST00000366661.8_2	NM_024525	HEK293, Hs68_RNase, Hs68_control, Nhek, K562, Hepg2, Helas3, H1hesc, Gm12878, Ag04450, A549, Sknshra, Mcf7, SY5Y_exp2_D0, diencephalon, cerebellum, Sy5y_exp1_D0, occipital_lobe, frontal_cortex, Sy5y_exp1_D2, parietal_lobe, temporal_lobe, SY5Y_exp2_D4, vena_cava, platelets	ANNOTATED, CDS, coding, INTERNAL, OVCODE, OVEXON	Jeck2013, Maass2017, Memczak2013, Rybak2015, Salzman2013	0.200418	1.14903	0.757926	0.920492	8.80631	8.60589	671.858	383.89	231.721	215.316	403.147	478.455	446.246	591.199	376.946	310.555
hsa_circ_0000196	chr1:231506307-231509845:-	EGLN1	circBase	257	2	3538	chr1:231503382-231506307|chr1:231509845-231556743	ENSG00000135766.8_2	ENST00000366641.3_1	NM_022051	HEK293, Hs68_RNase, Hs68_control, K562, Huvec, Helas3, H1hesc, Gm12878, Bj, Ag04450, A549, Nhlf, Sknshra, diencephalon, cerebellum, occipital_lobe, frontal_cortex, parietal_lobe, temporal_lobe	ANNOTATED, CDS, coding, INTERNAL, OVCODE, OVEXON	Jeck2013, Memczak2013, Rybak2015, Salzman2013	-0.0322271	0.97791	1	1	8.65737	8.68959	895.81	603.256	185.377	143.544	183.248	191.382	318.747	591.199	603.114	310.555
hsa_circ_0004834	chr1:231672958-231678357:+	TSNAX-DISC1	circBase	246	2	5399	chr1:231665105-231672958|chr1:231678357-231696873	ENSG00000116918.13_3	ENST00000366639.8_1	NR_028393	Hs68_RNase, Hs68_control, Nhek, K562, Gm12878, Bj, Ag04450, Sknshra, diencephalon, cerebellum, Sy5y_exp1_D0, occipital_lobe, frontal_cortex, Sy5y_exp1_D2, parietal_lobe, temporal_lobe, WAS2, ada_scid, muscle, MSC_047, platelets	ANNOTATED, INTERNAL, ncRNA, OVCODE, OVEXON	Jeck2013, Maass2017, Rybak2015, Salzman2013	-0.346901	0.786271	0.719742	0.896888	8.08667	8.43357	319.932	438.731	92.6884	394.745	439.796	287.073	0	369.499	452.335	232.916
hsa_circ_0007848	chr1:231930987-231954263:+	DISC1	circBase	347	3	23276	chr1:231906816-231930987|chr1:231954263-231990484	ENSG00000162946.21_4	ENST00000366632.6_1	NM_001164537	Hs68_RNase, Hs68_control, diencephalon, cerebellum, occipital_lobe, frontal_cortex, parietal_lobe, temporal_lobe, WAS2, vena_cava	ANNOTATED, CDS, coding, INTERNAL, OVCODE, OVERLAPTX, OVEXON	Jeck2013, Maass2017, Rybak2015	1.96279	3.89816	0.00972307	0.126793	9.9018	7.93901	0	191.945	602.474	215.316	219.898	478.455	446.246	1108.5	1206.23	1552.78
hsa_circ_0016957	chr1:233270758-233314921:-	PCNXL2	circBase	771	6	44163	chr1:233231609-233270758|chr1:233314921-233334684	ENSG00000135749.18_4	ENST00000258229.13_3	NM_014801	Nhek, Bj, Ag04450, A549	ANNOTATED, CDS, coding, INTERNAL, OVCODE, OVEXON	Salzman2013	0.0925933	1.06629	1	1	7.10698	7.01438	31.9932	164.524	92.6884	143.544	183.248	143.536	63.7494	0	226.168	232.916
chr1:233270758-233344435:-	chr1:233270758-233344435:-	PCNX2	CIRCexplorer2	1146	9	73677	chr1:233231609-233270758|chr1:233344435-233353644	ENSG00000135749.18_4	ENST00000258229.13_3	NA	NA	NA	NA	-0.85148	0.554216	0.429162	0.714441	7.03749	7.88897	223.953	164.524	0	287.087	476.446	574.146	0	0	0	0
hsa_circ_0016958	chr1:233270758-233372726:-	PCNXL2	circBase	1615	13	101968	chr1:233231609-233270758|chr1:233372726-233386484	ENSG00000135749.18_4	ENST00000258229.13_3	NM_014801	Huvec, H1hesc, Bj, A549, Sknshra	ANNOTATED, CDS, coding, INTERNAL, OVCODE, OVEXON	Salzman2013	-0.650071	0.637249	0.524385	0.778561	7.48851	8.13858	159.966	54.8414	46.3442	753.605	366.497	191.382	0	221.7	0	465.833
hsa_circ_0001958	chr1:233313547-233344435:-	PCNXL2	circBase	582	5	30888	chr1:233297109-233313547|chr1:233344435-233353644	ENSG00000135749.18_4	ENST00000258229.13_3	NM_014801	Hs68_RNase, Hs68_control, H1hesc, Gm12878, Ag04450, A549, Mcf7, diencephalon, cerebellum, temporal_lobe	ANNOTATED, CDS, coding, INTERNAL, OVCODE, OVEXON	Jeck2013, Rybak2015, Salzman2013	1.70218	3.25393	0.15572	0.457937	7.74759	6.04541	31.9932	82.2622	0	71.7719	109.949	95.691	0	665.099	301.557	0
hsa_circ_0000198	chr1:233334684-233372726:-	PCNXL2	circBase	844	7	38042	chr1:233314921-233334684|chr1:233372726-233386484	ENSG00000135749.18_4	ENST00000258229.13_3	NM_014801	HEK293, Hs68_RNase, Hs68_control, Nhek, Huvec, Hepg2, Helas3, H1hesc, Gm12878, Bj, Ag04450, A549, Sknshra, Mcf7, SY5Y_exp2_D0, diencephalon, Sy5y_exp1_D4, cerebellum, Sy5y_exp1_D0, occipital_lobe, frontal_cortex, Sy5y_exp1_D2, parietal_lobe, temporal_lobe	ANNOTATED, CDS, coding, INTERNAL, OVCODE, OVEXON	Jeck2013, Memczak2013, Rybak2015, Salzman2013	-0.358318	0.780073	0.73405	0.907206	7.81537	8.17368	95.9797	137.104	324.409	430.631	439.796	334.918	0	147.8	301.557	310.555
hsa_circ_0006881	chr1:233334684-233388534:-	PCNXL2	circBase	1232	10	53850	chr1:233314921-233334684|chr1:233388534-233393773	ENSG00000135749.18_4	ENST00000258229.13_3	NM_014801	Hs68_RNase, Hs68_control, Huvec, A549, diencephalon, cerebellum, Sy5y_exp1_D0, occipital_lobe, frontal_cortex, parietal_lobe, temporal_lobe	ANNOTATED, CDS, coding, INTERNAL, OVCODE, OVEXON	Jeck2013, Rybak2015, Salzman2013	0.777827	1.71455	0.475361	0.749637	8.10029	7.32246	95.9797	0	370.753	251.202	73.2994	143.536	0	0	603.114	621.11
hsa_circ_0003314	chr1:233353644-233363117:-	PCNXL2	circBase	333	3	9473	chr1:233344435-233353644|chr1:233363117-233372590	ENSG00000135749.18_4	ENST00000258229.13_3	NM_014801	Hs68_RNase, Hs68_control, Nhek, Huvec, Hepg2, Helas3, H1hesc, Gm12878, Bj, Ag04450, A549, Sknshra, diencephalon, cerebellum, occipital_lobe, frontal_cortex, parietal_lobe, temporal_lobe	ANNOTATED, CDS, coding, INTERNAL, OVCODE, OVEXON	Jeck2013, Rybak2015, Salzman2013	1.03563	2.05001	0.197298	0.521192	8.51906	7.48343	351.926	246.786	185.377	35.8859	36.6497	334.918	127.499	443.399	678.503	232.916
hsa_circ_0112434	chr1:23356961-23370979:+	KDM1A	circBase	226	2	14018	chr1:23346440-23356961|chr1:23370979-23376879	ENSG00000004487.15_3	ENST00000400181.8_1	NM_001009999	SY5Y_exp2_D0, diencephalon, cerebellum, occipital_lobe, frontal_cortex, parietal_lobe, temporal_lobe	ANNOTATED, CDS, coding, INTERNAL, OVCODE, OVERLAPTX, OVEXON	Rybak2015	1.69253	3.23224	0.253347	0.578156	7.39343	5.7009	0	82.2622	0	143.544	0	287.073	63.7494	0	452.335	0
hsa_circ_0009061	chr1:23356961-23377013:+	KDM1A	circBase	300	2	20052	chr1:23346440-23356961|chr1:23377013-23380253	ENSG00000004487.15_3	ENST00000356634.7_1	NM_001009999	Hs68_RNase, Hs68_control, Nhek, K562, Hepg2, Helas3, H1hesc, Gm12878, Bj, Ag04450, A549, Sknshra, diencephalon, Sy5y_exp1_D4, cerebellum, Sy5y_exp1_D0, occipital_lobe, frontal_cortex, Sy5y_exp1_D2, parietal_lobe, SY5Y_exp2_D8, temporal_lobe, WAS2, adipose, VSMC, vena_cava	ANNOTATED, CDS, coding, INTERNAL, OVCODE, OVEXON	Jeck2013, Maass2017, Rybak2015, Salzman2013	-0.44454	0.734819	0.501081	0.765105	8.9896	9.43414	607.871	904.884	417.098	753.605	732.994	430.609	573.745	665.099	150.778	698.749
hsa_circ_0010835	chr1:23397717-23398690:+	KDM1A	circBase	209	2	973	chr1:23395644-23397717|chr1:23398690-23399784	ENSG00000004487.15_3	ENST00000356634.7_1	NM_001009999	K562, diencephalon, cerebellum, occipital_lobe, frontal_cortex, parietal_lobe, temporal_lobe, platelets	ANNOTATED, CDS, coding, INTERNAL, OVCODE, OVERLAPTX, OVEXON	Maass2017, Rybak2015, Salzman2013	-0.433047	0.740696	0.639503	0.850009	7.93375	8.3668	383.919	274.207	46.3442	538.289	366.497	191.382	254.998	221.7	376.946	155.278
hsa_circ_0112551	chr1:236332005-236347206:+	GPR137B	circBase	552	4	15201	chr1:236306336-236332005|chr1:236347206-236368425	ENSG00000077585.13_3	ENST00000366592.7_3	NM_003272	diencephalon, cerebellum, occipital_lobe, frontal_cortex, parietal_lobe, temporal_lobe	ANNOTATED, CDS, coding, INTERNAL, OVCODE, OVEXON	Rybak2015	0.488927	1.4034	0.636244	0.848544	7.6451	7.15618	127.973	82.2622	231.721	107.658	146.599	0	382.497	147.8	75.3892	388.194
hsa_circ_0017181	chr1:240341220-240374535:+	FMN2	circBase	2283	4	33315	chr1:240286645-240341220|chr1:240374535-240421244	ENSG00000155816.19_3	ENST00000319653.13_1	NM_020066	Bj, temporal_lobe	ANNOTATED, CDS, coding, INTERNAL, OVCODE, OVERLAPTX, OVEXON	Rybak2015, Salzman2013	-0.119231	0.920678	0.949673	1	7.90489	8.02412	351.926	109.683	46.3442	430.631	329.847	334.918	0	369.499	0	465.833
chr1:240351506-240374535:+	chr1:240351506-240374535:+	FMN2	CIRCexplorer2	2135	3	23029	chr1:240341368-240351506|chr1:240374535-240421244	ENSG00000155816.19_3	ENST00000319653.13_1	NA	NA	NA	NA	-1.13694	0.454722	0.241942	0.568421	6.86261	7.99956	191.959	164.524	92.6884	287.087	513.096	47.8455	0	147.8	150.778	232.916
hsa_circ_0005180	chr1:240370098-240374535:+	FMN2	circBase	2079	2	4437	chr1:240351562-240370098|chr1:240374535-240421244	ENSG00000155816.19_3	ENST00000319653.13_1	NM_020066	Hs68_RNase, Hs68_control, cortex	ANNOTATED, CDS, coding, INTERNAL, OVCODE, OVEXON	Jeck2013, Maass2017	-0.487644	0.713189	0.582904	0.814127	7.47484	7.96249	95.9797	164.524	278.065	358.859	329.847	287.073	318.747	0	226.168	0
hsa_circ_0112705	chr1:240370098-240421332:+	FMN2	circBase	2167	3	51234	chr1:240351562-240370098|chr1:240421332-240458121	ENSG00000155816.19_3	ENST00000319653.13_1	ENST00000319653.9	parietal_lobe, temporal_lobe	ANNOTATED, CDS, coding, INTERNAL, OVCODE, OVEXON	Rybak2015	0.331599	1.25841	0.644821	0.851366	9.69662	9.36502	575.878	219.366	185.377	1004.81	1282.74	1243.98	637.494	147.8	678.503	1397.5
hsa_circ_0017184	chr1:240370098-240458183:+	FMN2	circBase	2229	4	88085	chr1:240351562-240370098|chr1:240458183-240492375	ENSG00000155816.19_3	ENST00000319653.13_1	NM_020066	Bj, Sknshra, diencephalon, frontal_cortex, parietal_lobe, cortex	ANNOTATED, CDS, coding, INTERNAL, OVCODE, OVEXON	Maass2017, Rybak2015, Salzman2013	0.422214	1.33998	0.558397	0.797445	10.5159	10.0936	639.865	356.469	324.409	1148.35	2968.62	3397.03	573.745	665.099	1130.84	1475.14
hsa_circ_0005344	chr1:241031886-241033419:-	RGS7	circBase	224	3	1533	chr1:240990472-241031886|chr1:241033419-241146378	ENSG00000182901.16_3	ENST00000348120.6_1	NM_002924	Hs68_RNase, Hs68_control, diencephalon, cerebellum, occipital_lobe, frontal_cortex, parietal_lobe	ANNOTATED, CDS, coding, INTERNAL, OVCODE, OVEXON	Jeck2013, Rybak2015	-3.79357	0.0721143	0.00109222	0.040871	4.17841	7.97198	95.9797	219.366	185.377	215.316	513.096	47.8455	0	0	0	0
hsa_circ_0003757	chr1:24140679-24147083:-	HMGCL	circBase	437	4	6404	chr1:24137289-24140679|chr1:24147083-24151845	ENSG00000117305.14_3	ENST00000374490.7_1	NM_000191	Hs68_RNase, Hs68_control, Nhek, K562, Hepg2, Gm12878, Bj, Ag04450, A549, Sknshra, diencephalon, cerebellum, occipital_lobe, frontal_cortex, parietal_lobe, temporal_lobe, WAS2	ANNOTATED, CDS, coding, INTERNAL, OVCODE, OVEXON	Jeck2013, Maass2017, Rybak2015, Salzman2013	1.25918	2.3936	0.160438	0.4665	8.16691	6.90772	127.973	137.104	46.3442	179.43	73.2994	0	382.497	665.099	75.3892	310.555
chr1:243456392-243589860:+	chr1:243456392-243589860:+	SDCCAG8	CIRCexplorer2	1439	11	133468	chr1:243449699-243456392|chr1:243589860-243652315	ENSG00000054282.15_2	ENST00000366541.7_1	NA	NA	NA	NA	-1.86305	0.274894	0.199626	0.523816	4.97013	6.83318	0	0	231.721	179.43	146.599	47.8455	0	0	0	77.6388
chr1:243480056-243589860:+	chr1:243480056-243589860:+	SDCCAG8	CIRCexplorer2	1056	8	109804	chr1:243471479-243480056|chr1:243589860-243652315	ENSG00000054282.15_2	ENST00000366541.7_1	NA	NA	NA	NA	-0.939336	0.521473	0.278847	0.591907	7.71392	8.65325	95.9797	493.573	417.098	430.631	549.745	382.764	446.246	0	150.778	0
hsa_circ_0017241	chr1:243579003-243589860:+	SDCCAG8	circBase	369	3	10857	chr1:243542165-243579003|chr1:243589860-243652315	ENSG00000054282.15_2	ENST00000366541.7_1	NM_006642	Ag04450, diencephalon, cerebellum, occipital_lobe, frontal_cortex, Sy5y_exp1_D2, parietal_lobe, temporal_lobe, WAS2, adipose, right_atrium, platelets	ANNOTATED, CDS, coding, INTERNAL, OVCODE, OVERLAPTX, OVEXON	Maass2017, Rybak2015, Salzman2013	-0.477166	0.718387	0.478084	0.750402	9.18631	9.66347	991.79	1206.51	463.442	610.061	732.994	287.073	573.745	295.599	829.282	931.665
hsa_circ_0000199	chr1:243708811-243736350:-	AKT3	circBase	555	4	27539	chr1:243675728-243708811|chr1:243736350-243776972	ENSG00000117020.16_3	ENST00000336199.9_1	NM_181690	HEK293, cd_19, Hs68_RNase, Hs68_control, Huvec, H1hesc, Bj, Ag04450, A549, Sknshra, SY5Y_exp2_D0, diencephalon, cerebellum, occipital_lobe, frontal_cortex, parietal_lobe, SY5Y_exp2_D8, temporal_lobe, osteocytes, VSMC, MSC_047, HUAEC, platelets	ANNOTATED, CDS, coding, INTERNAL, OVCODE, OVEXON	Jeck2013, Maass2017, Memczak2013, Rybak2015, Salzman2013	-0.394576	0.760713	0.543007	0.789439	9.91777	10.3123	767.838	685.518	1529.36	2081.38	1282.74	669.837	1848.73	369.499	753.892	1164.58
hsa_circ_0112773	chr1:243708811-243778463:-	AKT3	circBase	690	6	69652	chr1:243675728-243708811|chr1:243778463-243800912	ENSG00000117020.16_3	ENST00000336199.9_1	NM_005465	diencephalon, cerebellum, occipital_lobe, frontal_cortex, parietal_lobe, temporal_lobe	ANNOTATED, CDS, coding, INTERNAL, OVCODE, OVERLAPTX, OVEXON	Rybak2015	-2.18043	0.220611	0.03346	0.219534	5.77254	7.95296	351.926	246.786	92.6884	143.544	366.497	143.536	0	0	0	77.6388
chr1:243708811-243859018:-	chr1:243708811-243859018:-	AKT3	CIRCexplorer2	1205	10	150207	chr1:243675728-243708811|chr1:243859018-244006426	ENSG00000117020.16_3	ENST00000336199.9_1	NA	NA	NA	NA	-1.53775	0.344422	0.040177	0.246406	8.84185	10.3796	1375.71	795.201	695.163	2224.93	1539.29	1483.21	318.747	221.7	0	155.278
hsa_circ_0017242	chr1:243708811-244006584:-	AKT3	circBase	1363	11	297773	chr1:243675728-243708811|chr1:244006584-244006845	ENSG00000117020.16_3	ENST00000366540.5_1	NM_005465	Huvec, H1hesc, Bj, Ag04450	ANNOTATED, CDS, coding, OVCODE, OVERLAPTX, OVEXON, UTR5	Salzman2013	-0.466391	0.723773	0.507343	0.768755	10.7772	11.2436	2463.48	2166.24	880.539	2727.33	3848.22	3923.33	2677.48	221.7	226.168	1630.41
hsa_circ_0017244	chr1:243727021-244006584:-	AKT3	circBase	1060	9	279563	chr1:243716245-243727021|chr1:244006584-244006845	ENSG00000117020.16_3	ENST00000366540.5_1	NM_005465	H1hesc, Gm12878, Bj, Ag04450, Sknshra	ANNOTATED, CDS, coding, OVCODE, OVERLAPTX, OVEXON, UTR5	Salzman2013	-0.854576	0.553028	0.240853	0.566379	8.61881	9.47338	351.926	329.049	787.851	789.49	1282.74	621.991	446.246	0	376.946	465.833
hsa_circ_0017248	chr1:243736227-244006584:-	AKT3	circBase	931	8	270357	chr1:243727150-243736227|chr1:244006584-244006845	ENSG00000117020.16_3	ENST00000366540.5_1	NM_005465	H1hesc, Bj, Ag04450, A549, Sknshra	ANNOTATED, CDS, coding, OVCODE, OVERLAPTX, OVEXON, UTR5	Salzman2013	-0.785726	0.58006	0.301482	0.609141	9.03552	9.82125	895.81	438.731	1019.57	538.289	1612.59	1674.59	382.497	221.7	0	232.916
hsa_circ_0006696	chr1:243776972-243801044:-	AKT3	circBase	267	3	24072	chr1:243736350-243776972|chr1:243801044-243809194	ENSG00000117020.16_3	ENST00000336199.9_1	NM_005465	Hs68_RNase, Hs68_control, A549, Sknshra, diencephalon, cerebellum, occipital_lobe, frontal_cortex, Sy5y_exp1_D2, parietal_lobe, temporal_lobe	ANNOTATED, CDS, coding, INTERNAL, OVCODE, OVEXON	Jeck2013, Rybak2015, Salzman2013	1.353	2.55443	0.292309	0.602243	7.69435	6.34135	31.9932	27.4207	185.377	0	146.599	191.382	0	295.599	527.725	0
hsa_circ_0017251	chr1:243776972-243859018:-	AKT3	circBase	650	6	82046	chr1:243736350-243776972|chr1:243859018-244006426	ENSG00000117020.16_3	ENST00000336199.9_1	NM_005465	H1hesc, diencephalon, Sy5y_exp1_D4, cerebellum, Sy5y_exp1_D0, occipital_lobe, frontal_cortex, Sy5y_exp1_D2, parietal_lobe, temporal_lobe, platelets	ANNOTATED, CDS, coding, INTERNAL, OVCODE, OVERLAPTX, OVEXON	Maass2017, Rybak2015, Salzman2013	-0.968524	0.511028	0.19175	0.514882	8.49144	9.45997	735.844	795.201	278.065	717.719	952.892	382.764	318.747	295.599	0	776.388
hsa_circ_0017252	chr1:243776972-244006584:-	AKT3	circBase	808	7	229612	chr1:243736350-243776972|chr1:244006584-244006845	ENSG00000117020.16_3	ENST00000366540.5_1	NM_005465	Huvec, Hmec, Bj, Ag04450, A549, Sknshra	ANNOTATED, CDS, coding, OVCODE, OVERLAPTX, OVEXON, UTR5	Salzman2013	-0.799769	0.574441	0.224775	0.54931	10.1863	10.9861	1663.65	1069.41	1436.67	2942.65	3005.27	2392.27	2039.98	369.499	301.557	621.11
hsa_circ_0017253	chr1:243800912-244006584:-	AKT3	circBase	673	5	205672	chr1:243778463-243800912|chr1:244006584-244006845	ENSG00000117020.16_3	ENST00000366540.5_1	NM_005465	Ag04450, Sknshra	ANNOTATED, CDS, coding, OVCODE, OVERLAPTX, OVEXON, UTR5	Salzman2013	-0.775231	0.584295	0.407682	0.703296	7.35629	8.13152	191.959	274.207	139.033	215.316	549.745	382.764	0	147.8	0	232.916
hsa_circ_0112831	chr1:245180543-245246990:+	EFCAB2	circBase	348	5	66447	chr1:245133100-245180543|chr1:245246990-245254795	ENSG00000203666.12_2	ENST00000391837.7_1	ENST00000366522.2	diencephalon, cerebellum, occipital_lobe, frontal_cortex, parietal_lobe, temporal_lobe	ANNOTATED, CDS, coding, INTERNAL, OVCODE, OVEXON	Rybak2015	-0.34368	0.788028	0.760135	0.922741	7.0119	7.35558	95.9797	246.786	0	179.43	256.548	191.382	254.998	147.8	0	0
hsa_circ_0017306	chr1:246490502-246498776:-	SMYD3	circBase	303	3	8274	chr1:246093239-246490502|chr1:246498776-246518332	ENSG00000185420.18_3	ENST00000630181.2_1	NM_001167740	Nhek, K562, Helas3, A549, Sknshra, diencephalon, cerebellum, occipital_lobe, frontal_cortex, Sy5y_exp1_D2, parietal_lobe, temporal_lobe, chondrocytes, platelets	ANNOTATED, CDS, coding, INTERNAL, OVCODE, OVEXON	Maass2017, Rybak2015, Salzman2013	1.1821	2.26907	0.282459	0.594868	7.40864	6.22655	0	109.683	92.6884	71.7719	73.2994	95.691	127.499	147.8	0	465.833
hsa_circ_0017348	chr1:247322307-247323115:-	ZNF124	circBase	188	2	808	chr1:247287173-247322307|chr1:247323115-247335149	ENSG00000196418.12_3	ENST00000472531.5_1	NM_001243740	Nhek, K562, Huvec, Helas3, H1hesc, Gm12878, Bj, Ag04450, A549, Sknshra, cerebellum, Sy5y_exp1_D0, occipital_lobe, frontal_cortex, parietal_lobe	ANNOTATED, CDS, coding, INTERNAL, OVCODE, OVEXON	Rybak2015, Salzman2013	1.43392	2.7018	0.113723	0.400138	8.86547	7.43155	63.9865	0	92.6884	502.403	183.248	382.764	63.7494	886.798	829.282	155.278
hsa_circ_0003553	chr1:24840803-24841057:+	RCAN3	circBase	254	1	254	chr1:24828953-24840803|chr1:24841057-24857707	ENSG00000117602.11_2	ENST00000538532.5_1	NM_013441	Hs68_RNase, Hs68_control, Huvec, diencephalon, cerebellum, occipital_lobe, frontal_cortex, parietal_lobe, temporal_lobe, SY5Y_exp2_D4, chondrocytes, platelets	ANNOTATED, CDS, coding, INTERNAL, OVCODE, OVEXON, UTR5	Jeck2013, Maass2017, Rybak2015, Salzman2013	-2.00059	0.249899	0.0597069	0.300927	7.23089	9.23147	1023.78	1617.82	92.6884	179.43	36.6497	0	63.7494	0	376.946	310.555
chr1:24993305-24996806:+	chr1:24993305-24996806:+	SRRM1	CIRCexplorer2	772	3	3501	chr1:24989295-24993305|chr1:24996806-24997876	ENSG00000133226.16_4	ENST00000323848.13_1	NA	NA	NA	NA	0.388293	1.30884	0.814171	0.950125	6.89646	6.50817	31.9932	0	231.721	107.658	73.2994	0	63.7494	295.599	226.168	0
hsa_circ_0000032	chr1:25666964-25669564:+	TMEM50A	circBase	219	2	2600	chr1:25664947-25666964|chr1:25669564-25678116	ENSG00000183726.10_2	ENST00000374358.4_1	NM_014313	cd_19, Hs68_RNase, Hs68_control, K562, Helas3, diencephalon, Sy5y_exp1_D4, cerebellum, occipital_lobe, frontal_cortex, parietal_lobe, temporal_lobe, decidua, muscle, neutophils, platelets	ANNOTATED, CDS, coding, INTERNAL, OVCODE, OVEXON, UTR5	Jeck2013, Maass2017, Memczak2013, Rybak2015, Salzman2013	0.252423	1.19121	0.863549	0.968924	8.14716	7.89473	319.932	164.524	278.065	35.8859	366.497	95.691	254.998	0	1055.45	0
hsa_circ_0007054	chr1:25666964-25678184:+	TMEM50A	circBase	287	3	11220	chr1:25664947-25666964|chr1:25678184-25679372	ENSG00000183726.10_2	ENST00000374358.4_1	NM_014313	Hs68_RNase, Hs68_control, K562, Helas3, H1hesc, A549, Mcf7, diencephalon, cerebellum, occipital_lobe, frontal_cortex, Sy5y_exp1_D2, parietal_lobe, temporal_lobe, platelets	ANNOTATED, CDS, coding, INTERNAL, OVCODE, OVEXON, UTR5	Jeck2013, Maass2017, Rybak2015, Salzman2013	-1.08217	0.472319	0.201771	0.527834	7.10316	8.18532	191.959	164.524	278.065	322.973	476.446	287.073	254.998	0	75.3892	0
hsa_circ_0000033	chr1:26584087-26586293:+	CEP85	circBase	438	3	2206	chr1:26582356-26584087|chr1:26586293-26594973	ENSG00000130695.14_2	ENST00000451429.6_1	NM_022778	cd_19, Hs68_RNase, Hs68_control, Nhek, K562, Helas3, H1hesc, Gm12878, Ag04450, A549, Sknshra, diencephalon, cerebellum, occipital_lobe, frontal_cortex, Sy5y_exp1_D2, parietal_lobe, temporal_lobe, WAS2, vena_cava, platelets	ANNOTATED, CDS, coding, INTERNAL, OVCODE, OVEXON	Jeck2013, Maass2017, Memczak2013, Rybak2015, Salzman2013	-0.965426	0.512127	0.337468	0.638407	6.90673	7.87215	287.939	274.207	139.033	251.202	183.248	191.382	0	369.499	0	0
hsa_circ_0008494	chr1:27056141-27059283:+	ARID1A	circBase	783	3	3142	chr1:27020108-27056141|chr1:27059283-27087346	ENSG00000117713.18_3	ENST00000430799.7_2	NM_006015	Hs68_RNase, Hs68_control, Nhek, K562, Huvec, Hsmm, Helas3, H1hesc, Gm12878, Bj, Ag04450, A549, Nhlf, Sknshra, SY5Y_exp2_D0, diencephalon, Sy5y_exp1_D4, cerebellum, occipital_lobe, frontal_cortex, Sy5y_exp1_D2, parietal_lobe, SY5Y_exp2_D8, temporal_lobe, vena_cava, right_atrium	ANNOTATED, CDS, coding, INTERNAL, OVCODE, OVEXON	Jeck2013, Maass2017, Rybak2015, Salzman2013	-0.0105543	0.992711	0.991376	1	11.068	11.0786	1343.72	1096.83	3892.91	2834.99	1649.24	2440.12	3187.47	1256.3	2789.4	1009.3
hsa_circ_0005087	chr1:27269150-27269556:+	NUDC	circBase	312	2	406	chr1:27268309-27269150|chr1:27269556-27271880	ENSG00000090273.13_3	ENST00000321265.9_1	NM_006600	Hs68_RNase, Hs68_control, diencephalon, occipital_lobe, frontal_cortex, parietal_lobe, temporal_lobe	ANNOTATED, CDS, coding, INTERNAL, OVCODE, OVEXON	Jeck2013, Rybak2015	-1.34096	0.394758	0.0587151	0.300667	8.68542	10.0264	1599.66	2001.71	463.442	466.517	623.045	430.609	382.497	443.399	75.3892	698.749
hsa_circ_0008126	chr1:28116072-28120143:+	STX12	circBase	170	2	4071	chr1:28099936-28116072|chr1:28120143-28128188	ENSG00000117758.13_3	ENST00000373943.8_1	NM_177424	Hs68_RNase, Hs68_control, Nhek, K562, Helas3, H1hesc, Gm12878, Ag04450, diencephalon, cerebellum, occipital_lobe, frontal_cortex, parietal_lobe, temporal_lobe, WAS2, adipose, platelets	ANNOTATED, CDS, coding, INTERNAL, OVCODE, OVEXON	Jeck2013, Maass2017, Rybak2015, Salzman2013	0.425758	1.34328	0.614094	0.838411	8.21629	7.79054	255.946	219.366	46.3442	215.316	329.847	239.227	318.747	147.8	603.114	155.278
hsa_circ_0007895	chr1:28362054-28384605:-	EYA3	circBase	429	5	22551	chr1:28354437-28362054|chr1:28384605-28415034	ENSG00000158161.15_3	ENST00000373871.7_1	NM_001990	Hs68_RNase, Hs68_control, Nhek, K562, Huvec, Hepg2, Helas3, H1hesc, Gm12878, Bj, Ag04450, A549, Sknshra, Mcf7, diencephalon, cerebellum, Sy5y_exp1_D0, occipital_lobe, frontal_cortex, Sy5y_exp1_D2, parietal_lobe, temporal_lobe, neutophils, platelets	ANNOTATED, CDS, coding, INTERNAL, OVCODE, OVEXON, UTR5	Jeck2013, Maass2017, Rybak2015, Salzman2013	-1.25617	0.418654	0.2612	0.582101	6.41602	7.67218	319.932	82.2622	417.098	0	183.248	287.073	0	0	75.3892	0
hsa_circ_0006602	chr1:29481207-29481422:-	SRSF4	circBase	215	1	215	chr1:29476704-29481207|chr1:29481422-29485885	ENSG00000116350.16_3	ENST00000373795.6_1	NM_005626	Hs68_RNase, Hs68_control, K562, Huvec, Hepg2, Helas3, Gm12878, Bj, Ag04450, Sknshra, SY5Y_exp2_D0, diencephalon, cerebellum, Sy5y_exp1_D0, occipital_lobe, frontal_cortex, Sy5y_exp1_D2, parietal_lobe, temporal_lobe, SY5Y_exp2_D4, chondrocytes, WAS2, ada_scid, adipose, right_atrium, HUAEC, platelets, MSC	ANNOTATED, CDS, coding, INTERNAL, OVCODE, OVEXON	Jeck2013, Maass2017, Rybak2015, Salzman2013	-0.0630244	0.957255	0.952025	1	9.18085	9.24387	1343.72	1014.57	185.377	287.087	146.599	143.536	1529.99	369.499	753.892	77.6388
hsa_circ_0000043	chr1:31465236-31468067:-	PUM1	circBase	438	2	2831	chr1:31454252-31465236|chr1:31468067-31478699	ENSG00000134644.15_2	ENST00000257075.9_1	NM_014676	cd_19, Hs68_RNase, Hs68_control, Nhek, K562, Huvec, Hepg2, Helas3, H1hesc, Gm12878, Bj, Ag04450, A549, Sknshra, Mcf7, diencephalon, cerebellum, Sy5y_exp1_D0, occipital_lobe, frontal_cortex, Sy5y_exp1_D2, parietal_lobe, temporal_lobe, WAS2	ANNOTATED, CDS, coding, INTERNAL, OVCODE, OVEXON	Jeck2013, Maass2017, Memczak2013, Rybak2015, Salzman2013	0.290285	1.22288	0.724776	0.899266	7.82871	7.53842	95.9797	301.628	92.6884	215.316	183.248	47.8455	254.998	221.7	301.557	310.555
hsa_circ_0009057	chr1:31810021-31811895:+	ZCCHC17	circBase	193	2	1874	chr1:31792013-31810021|chr1:31811895-31819486	ENSG00000121766.15_3	ENST00000546109.5_1	NM_016505	Hs68_RNase, Hs68_control, K562, Hepg2, Gm12878, Ag04450, Sknshra, diencephalon, cerebellum, occipital_lobe, frontal_cortex, parietal_lobe, temporal_lobe, muscle, platelets	ANNOTATED, CDS, coding, INTERNAL, OVCODE, OVEXON	Jeck2013, Maass2017, Rybak2015, Salzman2013	-0.0328316	0.9775	1	1	6.84976	6.8826	95.9797	301.628	0	0	146.599	0	254.998	73.8999	150.778	77.6388
hsa_circ_0007249	chr1:31810021-31821821:+	ZCCHC17	circBase	440	4	11800	chr1:31792013-31810021|chr1:31821821-31836878	ENSG00000121766.15_3	ENST00000546109.5_1	NM_016505	Hs68_RNase, Hs68_control, diencephalon, cerebellum, occipital_lobe, frontal_cortex, parietal_lobe, temporal_lobe, platelets	ANNOTATED, CDS, coding, INTERNAL, OVCODE, OVEXON	Jeck2013, Maass2017, Rybak2015	-0.582517	0.667798	0.597495	0.825874	7.65364	8.23616	415.912	493.573	46.3442	215.316	293.197	0	254.998	738.999	0	0
hsa_circ_0007364	chr1:32381495-32385259:-	PTP4A2	circBase	782	2	3764	None|chr1:32385259-32408129	ENSG00000184007.18_3	ENST00000468531.1_1	NM_080391	Hs68_RNase, Hs68_control, Nhek, K562, Huvec, Hsmm, Hepg2, Helas3, H1hesc, Gm12878, Bj, Ag04450, A549, Nhlf, Sknshra, Mcf7, diencephalon, cerebellum, occipital_lobe, frontal_cortex, parietal_lobe, temporal_lobe	ANNOTATED, CDS, coding, INTERNAL, OVCODE, OVEXON, UTR5	Jeck2013, Rybak2015, Salzman2013	-0.993031	0.502421	0.105136	0.385109	10.2065	11.1995	1151.76	1261.35	4680.76	2440.24	2235.63	1387.52	1657.49	738.999	678.503	1397.5
hsa_circ_0007777	chr1:32495898-32498935:+	KHDRBS1	circBase	389	3	3037	chr1:32479978-32495898|chr1:32498935-32502510	ENSG00000121774.17_2	ENST00000327300.11_1	NM_006559	Hs68_RNase, Hs68_control, Nhek, K562, Helas3, Gm12878, Sknshra, diencephalon, cerebellum, occipital_lobe, frontal_cortex, Sy5y_exp1_D2, parietal_lobe, temporal_lobe, SY5Y_exp2_D4	ANNOTATED, CDS, coding, INTERNAL, OVCODE, OVEXON	Jeck2013, Rybak2015, Salzman2013	1.35865	2.56445	0.196908	0.521192	7.99717	6.63852	159.966	219.366	0	71.7719	0	95.691	127.499	665.099	376.946	0
hsa_circ_0113067	chr1:33149610-33149983:-	SYNC	circBase	205	2	373	chr1:33147461-33149610|chr1:33149983-33160465	ENSG00000162520.14_3	ENST00000409190.7_1	NM_030786	parietal_lobe	ANNOTATED, CDS, coding, INTERNAL, OVCODE, OVERLAPTX, OVEXON	Rybak2015	3.742	13.38	0.00768943	0.110301	7.34098	3.59898	0	27.4207	0	0	0	0	127.499	369.499	301.557	0
hsa_circ_0000048	chr1:33413822-33415375:-	RNF19B	circBase	351	2	1553	chr1:33412165-33413822|chr1:33415375-33429651	ENSG00000116514.16_2	ENST00000373456.11_1	NM_153341	cd_19, neutr, Hs68_RNase, Hs68_control, Nhek, K562, Huvec, Hsmm, Hmec, Hepg2, Helas3, H1hesc, Gm12878, Bj, Ag04450, A549, Sknshra, Mcf7, SY5Y_exp2_D0, diencephalon, cerebellum, occipital_lobe, frontal_cortex, Sy5y_exp1_D2, parietal_lobe, temporal_lobe, EPC, WAS2, MSC_047, platelets	ANNOTATED, CDS, coding, INTERNAL, OVCODE, OVEXON	Jeck2013, Maass2017, Memczak2013, Rybak2015, Salzman2013	2.25282	4.76614	0.00154063	0.0472566	9.54381	7.29099	191.959	137.104	92.6884	107.658	219.898	430.609	573.745	812.899	753.892	1164.58
hsa_circ_0009027	chr1:33760537-33760906:+	ZNF362	circBase	238	2	369	chr1:33747412-33760537|chr1:33760906-33764530	ENSG00000160094.14_3	ENST00000539719.5_1	NM_152493	Hs68_RNase, Hs68_control, SY5Y_exp2_D0, diencephalon, Sy5y_exp1_D4, cerebellum, Sy5y_exp1_D0, occipital_lobe, frontal_cortex, Sy5y_exp1_D2, parietal_lobe, SY5Y_exp2_D8, temporal_lobe, SY5Y_exp2_D4, adipose, vena_cava, platelets	ANNOTATED, CDS, coding, INTERNAL, OVCODE, OVEXON	Jeck2013, Maass2017, Rybak2015	3.70488	13.04	6.74197e-05	0.00916198	9.87679	6.17191	191.959	54.8414	0	0	73.2994	95.691	2613.73	443.399	904.671	621.11
hsa_circ_0011536	chr1:35824525-35827390:+	ZMYM4	circBase	755	3	2865	chr1:35791006-35824525|chr1:35827390-35835629	ENSG00000146463.11_3	ENST00000314607.10_1	NM_005095	Nhek, K562, Huvec, Helas3, H1hesc, Gm12878, Ag04450, Sknshra, SY5Y_exp2_D0, diencephalon, Sy5y_exp1_D4, cerebellum, Sy5y_exp1_D0, occipital_lobe, frontal_cortex, Sy5y_exp1_D2, parietal_lobe, SY5Y_exp2_D8, temporal_lobe, WAS2, adipose, vena_cava, right_atrium, platelets	ANNOTATED, CDS, coding, INTERNAL, OVCODE, OVERLAPTX, OVEXON	Maass2017, Rybak2015, Salzman2013	-1.46453	0.362353	0.0189605	0.170579	9.39719	10.8617	1823.61	2029.13	1529.36	1578.98	2308.93	813.373	1211.24	591.199	150.778	543.471
hsa_circ_0000051	chr1:35846859-35854683:+	ZMYM4	circBase	1255	7	7824	chr1:35836228-35846859|chr1:35854683-35855548	ENSG00000146463.11_3	ENST00000314607.10_1	NM_005095	cd_19, Nhek, K562, Huvec, Hsmm, Helas3, H1hesc, Gm12878, Bj, Ag04450, A549, Sknshra, diencephalon, Sy5y_exp1_D4, cerebellum, Sy5y_exp1_D0, occipital_lobe, frontal_cortex, Sy5y_exp1_D2, parietal_lobe, temporal_lobe	ANNOTATED, CDS, coding, INTERNAL	Memczak2013, Rybak2015, Salzman2013	-0.56493	0.675988	0.493697	0.760294	7.80081	8.36574	191.959	246.786	278.065	394.745	513.096	239.227	446.246	0	0	388.194
hsa_circ_0011571	chr1:35936463-35944813:-	KIAA0319L	circBase	447	3	8350	chr1:35932296-35936463|chr1:35944813-35972212	ENSG00000142687.17_3	ENST00000325722.7_1	NM_024874	K562, Huvec, H1hesc, Gm12878, Sknshra, SY5Y_exp2_D0, diencephalon, Sy5y_exp1_D4, cerebellum, Sy5y_exp1_D0, occipital_lobe, frontal_cortex, parietal_lobe, temporal_lobe, SY5Y_exp2_D4, platelets	ANNOTATED, CDS, coding, INTERNAL, OVCODE, OVEXON	Maass2017, Rybak2015, Salzman2013	0.257267	1.19521	0.875943	0.976731	7.71841	7.46115	319.932	0	139.033	287.087	109.949	0	509.995	295.599	150.778	77.6388
hsa_circ_0011572	chr1:35940405-35944813:-	KIAA0319L	circBase	349	2	4408	chr1:35936561-35940405|chr1:35944813-35972212	ENSG00000142687.17_3	ENST00000325722.7_1	NM_024874	K562, Hepg2, Helas3, H1hesc, Gm12878, Ag04450, Sknshra, diencephalon, cerebellum, Sy5y_exp1_D0, occipital_lobe, frontal_cortex, parietal_lobe	ANNOTATED, CDS, coding, INTERNAL, OVCODE, OVEXON	Rybak2015, Salzman2013	1.65753	3.15475	0.0884491	0.359504	7.87	6.21247	127.973	27.4207	0	107.658	73.2994	287.073	382.497	147.8	150.778	155.278
hsa_circ_0004660	chr1:35944566-35944813:-	KIAA0319L	circBase	247	1	247	chr1:35940507-35944566|chr1:35944813-35972212	ENSG00000142687.17_3	ENST00000325722.7_1	NM_024874	Hs68_RNase, Hs68_control, Nhek, K562, Huvec, Hsmm, Helas3, H1hesc, Bj, Ag04450, Sknshra, Mcf7, diencephalon, cerebellum, occipital_lobe, frontal_cortex, parietal_lobe, temporal_lobe	ANNOTATED, CDS, coding, INTERNAL, OVCODE, OVEXON	Jeck2013, Rybak2015, Salzman2013	2.50829	5.68944	0.0683787	0.322178	7.35752	4.84924	0	0	92.6884	35.8859	0	0	127.499	0	527.725	155.278
hsa_circ_0000053	chr1:36826821-36828257:-	STK40	circBase	218	2	1436	chr1:36824423-36826821|None	ENSG00000196182.10_2	ENST00000473733.5_1	NM_032017	cd_19, diencephalon, cerebellum, occipital_lobe, frontal_cortex, Sy5y_exp1_D2, parietal_lobe, temporal_lobe, platelets	ALT_ACCEPTOR, CDS, coding, INTERNAL, intronic, UTR5	Maass2017, Memczak2013, Rybak2015	0.295414	1.22724	0.72005	0.896888	8.65954	8.36413	287.939	466.152	278.065	322.973	256.548	95.691	63.7494	1108.5	301.557	465.833
hsa_circ_0006373	chr1:40654726-40668286:+	RLF	circBase	573	4	13560	chr1:40627308-40654726|chr1:40668286-40688245	ENSG00000117000.8_2	ENST00000372771.4_1	NM_012421	Hs68_RNase, Hs68_control, diencephalon, Sy5y_exp1_D4, cerebellum, Sy5y_exp1_D0, occipital_lobe, frontal_cortex, Sy5y_exp1_D2, parietal_lobe, temporal_lobe, SY5Y_exp2_D4, WAS2, cortex, vena_cava, LCL, platelets	ANNOTATED, CDS, coding, INTERNAL, OVCODE, OVEXON	Jeck2013, Maass2017, Rybak2015	-0.224018	0.856177	0.792438	0.93986	8.97877	9.20279	255.946	438.731	370.753	681.833	1172.79	1626.75	254.998	0	226.168	310.555
hsa_circ_0003276	chr1:40872407-40875507:+	SMAP2	circBase	299	3	3100	chr1:40828108-40872407|chr1:40875507-40878687	ENSG00000084070.11_3	ENST00000435168.6_1	NM_022733	Hs68_RNase, Hs68_control, diencephalon, cerebellum, occipital_lobe, frontal_cortex, parietal_lobe, temporal_lobe	ANNOTATED, CDS, coding, INTERNAL, OVCODE, OVEXON	Jeck2013, Rybak2015	-2.15573	0.22442	0.0246467	0.19168	5.82269	7.97842	223.953	246.786	139.033	215.316	403.147	95.691	0	147.8	0	0
hsa_circ_0000061	chr1:41536266-41541123:-	SCMH1	circBase	360	2	4857	chr1:41514562-41536266|chr1:41541123-41578954	ENSG00000010803.16_2	ENST00000397174.6_2	NM_001172220	HEK293, cd_19, cd_34, Hs68_RNase, Hs68_control, Nhek, K562, Huvec, Hepg2, Helas3, H1hesc, Gm12878, Bj, Ag04450, A549, Sknshra, Mcf7, SY5Y_exp2_D0, diencephalon, Sy5y_exp1_D4, cerebellum, Sy5y_exp1_D0, occipital_lobe, frontal_cortex, Sy5y_exp1_D2, parietal_lobe, SY5Y_exp2_D8, temporal_lobe, SY5Y_exp2_D4, EPC, WAS2, adipose, vena_cava, right_atrium, muscle, platelets	ANNOTATED, CDS, coding, INTERNAL, OVCODE, OVEXON	Jeck2013, Maass2017, Memczak2013, Rybak2015, Salzman2013	-1.23038	0.426207	0.0487275	0.270996	9.10905	10.3394	1663.65	1508.14	973.228	789.49	1502.64	430.609	637.494	295.599	527.725	854.026
hsa_circ_0011950	chr1:42041214-42050989:-	HIVEP3	circBase	5728	2	9775	chr1:41990581-42041214|chr1:42050989-42094419	ENSG00000127124.14_3	ENST00000372583.5_1	NM_024503	Hsmm, Mcf7, diencephalon, cerebellum, occipital_lobe, parietal_lobe, temporal_lobe, cortex	ANNOTATED, CDS, coding, INTERNAL, OVCODE, OVEXON, UTR5	Maass2017, Rybak2015, Salzman2013	0.638378	1.55658	0.676362	0.87346	6.82191	6.18353	127.973	54.8414	0	71.7719	73.2994	287.073	0	147.8	0	77.6388
hsa_circ_0006848	chr1:42730785-42744343:-	FOXJ3	circBase	400	2	13558	chr1:42693637-42730785|chr1:42744343-42776720	ENSG00000198815.8_3	ENST00000372572.5_2	NM_001198851	Hs68_RNase, Hs68_control, K562, Huvec, Helas3, H1hesc, Gm12878, Bj, Ag04450, A549, Sknshra, diencephalon, cerebellum, occipital_lobe, frontal_cortex, parietal_lobe, temporal_lobe, WAS2, adipose, platelets	ANNOTATED, CDS, coding, INTERNAL, OVCODE, OVEXON	Jeck2013, Maass2017, Rybak2015, Salzman2013	1.69977	3.24849	0.0199974	0.173266	9.19104	7.49127	287.939	109.683	185.377	143.544	146.599	382.764	254.998	295.599	829.282	1164.58
hsa_circ_0113389	chr1:42948333-42964587:+	CCDC30	circBase	441	4	16254	chr1:42946237-42948333|chr1:42964587-43000559	ENSG00000186409.14_3	ENST00000477155.5_1	ENST00000428554.2	diencephalon, cerebellum, Sy5y_exp1_D0, occipital_lobe, frontal_cortex, parietal_lobe, temporal_lobe	ANNOTATED, coding, INTERNAL, OVEXON, UTR5	Rybak2015	-0.886613	0.540882	0.442771	0.724536	6.38405	7.27066	191.959	82.2622	185.377	179.43	109.949	95.691	63.7494	0	226.168	0
hsa_circ_0007437	chr1:44750506-44804994:-	ERI3	circBase	620	5	54488	chr1:44713710-44750506|chr1:44804994-44818521	ENSG00000117419.14_3	ENST00000372257.6_1	NM_024066	Hs68_RNase, Hs68_control, K562, Huvec, Helas3, H1hesc, Gm12878, Bj, Ag04450, A549, diencephalon, cerebellum, occipital_lobe, frontal_cortex, parietal_lobe, temporal_lobe	ANNOTATED, CDS, coding, INTERNAL, OVCODE, OVEXON	Jeck2013, Rybak2015, Salzman2013	1.87562	3.66959	0.0654453	0.314946	8.0544	6.17878	0	137.104	46.3442	107.658	36.6497	191.382	0	738.999	75.3892	310.555
hsa_circ_0007693	chr1:44773981-44804994:-	ERI3	circBase	547	4	31013	chr1:44750579-44773981|chr1:44804994-44818521	ENSG00000117419.14_3	ENST00000372257.6_1	NM_024066	Hs68_RNase, Hs68_control, Nhek, K562, Huvec, Hepg2, Helas3, H1hesc, Gm12878, Bj, Ag04450, A549, Nhlf, Sknshra, Mcf7, diencephalon, cerebellum, Sy5y_exp1_D0, occipital_lobe, frontal_cortex, Sy5y_exp1_D2, parietal_lobe, temporal_lobe, EPC, LCL	ANNOTATED, CDS, coding, INTERNAL, OVCODE, OVEXON	Jeck2013, Maass2017, Rybak2015, Salzman2013	1.20696	2.3085	0.0795301	0.346869	9.6665	8.45955	127.973	246.786	695.163	287.087	403.147	478.455	1211.24	443.399	829.282	1086.94
hsa_circ_0012152	chr1:44877652-44878394:+	RNF220	circBase	742	1	742	chr1:44871198-44877652|chr1:44878394-45079836	ENSG00000187147.17_2	ENST00000355387.6_1	NM_018150	Hepg2, Helas3, H1hesc, A549, diencephalon, cerebellum, occipital_lobe, frontal_cortex	ANNOTATED, CDS, coding, INTERNAL, OVCODE, OVEXON, UTR5	Rybak2015, Salzman2013	-0.179435	0.883049	0.831894	0.956818	9.03923	9.21867	127.973	27.4207	1668.39	287.087	879.592	717.682	127.499	147.8	678.503	931.665
hsa_circ_0002563	chr1:45223227-45223812:+	KIF2C	circBase	247	3	585	chr1:45221909-45223227|chr1:45223812-45224877	ENSG00000142945.12_2	ENST00000372224.8_2	NM_006845	Hs68_RNase, Hs68_control, Nhek, K562, Huvec, Hepg2, Helas3, H1hesc, Gm12878, Bj, Ag04450, A549, Sknshra, Mcf7, diencephalon, Sy5y_exp1_D4, cerebellum, Sy5y_exp1_D0, occipital_lobe, frontal_cortex, Sy5y_exp1_D2, parietal_lobe, temporal_lobe, WAS2	ANNOTATED, CDS, coding, INTERNAL, OVCODE, OVEXON	Jeck2013, Maass2017, Rybak2015, Salzman2013	1.64967	3.13762	0.355117	0.65307	6.74466	5.09499	0	0	0	143.544	0	0	0	221.7	301.557	0
hsa_circ_0113446	chr1:45553552-45553909:-	ZSWIM5	circBase	357	1	357	chr1:45525919-45553552|chr1:45553909-45671427	ENSG00000162415.6_3	ENST00000359600.5_1	NM_020883	diencephalon, cerebellum, occipital_lobe, frontal_cortex, parietal_lobe, temporal_lobe	ANNOTATED, CDS, coding, INTERNAL, OVCODE, OVEXON	Rybak2015	-1.29792	0.406711	0.0948873	0.370471	7.52542	8.82335	543.885	356.469	278.065	430.631	623.045	191.382	382.497	147.8	150.778	0
hsa_circ_0000067	chr1:46032240-46032692:+	AKR1A1	circBase	272	2	452	chr1:46027550-46032240|chr1:46032692-46033653	ENSG00000117448.13_3	ENST00000372070.7_1	NM_001202413	cd_19, Hs68_RNase, Hs68_control, Nhek, K562, Huvec, Hepg2, Helas3, H1hesc, Gm12878, Bj, Ag04450, A549, Nhlf, Sknshra, diencephalon, cerebellum, occipital_lobe, frontal_cortex, Sy5y_exp1_D2, parietal_lobe, temporal_lobe	ANNOTATED, CDS, coding, INTERNAL, OVCODE, OVEXON	Jeck2013, Memczak2013, Rybak2015, Salzman2013	0.288747	1.22158	0.915649	0.990329	7.20665	6.9179	63.9865	109.683	0	322.973	73.2994	95.691	382.497	147.8	75.3892	0
hsa_circ_0002053	chr1:46079767-46082065:+	NASP	circBase	573	5	2298	chr1:46078920-46079767|chr1:46082065-46082297	ENSG00000132780.16_3	ENST00000537798.5_1	NM_002482	Hs68_RNase, Hs68_control, occipital_lobe, frontal_cortex, parietal_lobe, temporal_lobe	ANNOTATED, CDS, coding, INTERNAL, OVCODE, OVEXON	Jeck2013, Rybak2015	0.519583	1.43354	0.69721	0.885516	7.46646	6.94688	159.966	54.8414	278.065	35.8859	73.2994	47.8455	573.745	0	75.3892	155.278
hsa_circ_0008774	chr1:46105881-46108171:-	GPBP1L1	circBase	267	2	2290	chr1:46099908-46105881|chr1:46108171-46120214	ENSG00000159592.10_3	ENST00000290795.7_1	NM_021639	Hs68_RNase, Hs68_control, diencephalon, Sy5y_exp1_D4, cerebellum, Sy5y_exp1_D0, occipital_lobe, frontal_cortex, Sy5y_exp1_D2, parietal_lobe, temporal_lobe, SY5Y_exp2_D4, WAS2, vena_cava, right_atrium, LCL, neutophils, platelets	ANNOTATED, CDS, coding, INTERNAL, OVCODE, OVEXON	Jeck2013, Maass2017, Rybak2015	0.452596	1.3685	0.570302	0.805654	9.01919	8.56659	63.9865	301.628	648.819	251.202	623.045	287.073	191.248	517.299	904.671	698.749
hsa_circ_0000068	chr1:46124699-46126897:-	GPBP1L1	circBase	1157	2	2198	chr1:46120991-46124699|chr1:46126897-46152083	ENSG00000159592.10_3	ENST00000290795.7_1	NM_021639	cd_19, Nhek, K562, Hepg2, Helas3, H1hesc, Gm12878, Bj, Ag04450, A549, Sknshra, Mcf7, diencephalon, cerebellum, occipital_lobe, frontal_cortex, parietal_lobe, temporal_lobe	ANNOTATED, CDS, coding, INTERNAL, UTR5	Memczak2013, Rybak2015, Salzman2013	-4.46885	0.0451588	0.00661848	0.102945	2.50164	6.97048	127.973	54.8414	92.6884	215.316	109.949	0	0	0	0	0
hsa_circ_0012300	chr1:46521466-46546422:-	PIK3R3	circBase	835	6	24956	chr1:46512297-46521466|chr1:46546422-46597518	ENSG00000117461.14_3	ENST00000262741.9_2	NM_003629	Nhek, K562, Hepg2, Gm12878, Ag04450, diencephalon, Sy5y_exp1_D4, cerebellum, Sy5y_exp1_D0, occipital_lobe, frontal_cortex, Sy5y_exp1_D2, parietal_lobe, temporal_lobe, WAS2, right_atrium	ANNOTATED, CDS, coding, INTERNAL, OVCODE, OVEXON	Maass2017, Rybak2015, Salzman2013	-1.32732	0.398507	0.153764	0.453728	7.2149	8.54222	767.838	712.939	0	179.43	146.599	143.536	191.248	221.7	75.3892	77.6388
hsa_circ_0003161	chr1:46543186-46546422:-	PIK3R3	circBase	208	2	3236	chr1:46532763-46543186|chr1:46546422-46597518	ENSG00000117461.14_3	ENST00000262741.9_2	NM_003629	Hs68_RNase, Hs68_control, K562, diencephalon, cerebellum, occipital_lobe, frontal_cortex, Sy5y_exp1_D2, parietal_lobe	ANNOTATED, CDS, coding, INTERNAL, OVCODE, OVEXON	Jeck2013, Rybak2015, Salzman2013	-2.49438	0.177467	0.0629278	0.30868	5.02333	7.51771	255.946	493.573	46.3442	0	73.2994	0	63.7494	73.8999	0	0
hsa_circ_0008202	chr1:48821341-48825442:-	SPATA6	circBase	285	2	4101	chr1:48771550-48821341|chr1:48825442-48850980	ENSG00000132122.11_3	ENST00000371847.7_1	NM_019073	Hs68_RNase, Hs68_control, Helas3, H1hesc, Ag04450, Sknshra, SY5Y_exp2_D0, diencephalon, cerebellum, Sy5y_exp1_D0, occipital_lobe, frontal_cortex, Sy5y_exp1_D2, parietal_lobe, temporal_lobe, SY5Y_exp2_D4, vena_cava	ANNOTATED, CDS, coding, INTERNAL, OVCODE, OVEXON	Jeck2013, Maass2017, Rybak2015, Salzman2013	1.64208	3.12115	0.0263946	0.195722	10.0351	8.39297	159.966	54.8414	973.228	143.544	366.497	478.455	701.244	1625.8	1357.01	1086.94
chr1:48821341-48851021:-	chr1:48821341-48851021:-	SPATA6	CIRCexplorer2	326	3	29680	chr1:48771550-48821341|chr1:48851021-48860938	ENSG00000132122.11_3	ENST00000371847.7_1	NA	NA	NA	NA	3.61718	12.271	0.0195577	0.172324	7.32857	3.71138	0	0	46.3442	0	0	47.8455	63.7494	147.8	150.778	388.194
hsa_circ_0012386	chr1:48821341-48869554:-	SPATA6	circBase	789	6	48213	chr1:48771550-48821341|chr1:48869554-48877135	ENSG00000132122.11_3	ENST00000371847.7_1	NM_019073	Sknshra, diencephalon, cerebellum, occipital_lobe, frontal_cortex	ANNOTATED, CDS, coding, INTERNAL, OVCODE, OVEXON	Rybak2015, Salzman2013	2.03261	4.09146	0.0853444	0.356976	7.74901	5.7164	0	0	185.377	0	73.2994	95.691	63.7494	221.7	376.946	310.555
hsa_circ_0113490	chr1:48860938-48865316:-	SPATA6	circBase	382	2	4378	chr1:48851021-48860938|chr1:48865316-48869473	ENSG00000132122.11_3	ENST00000371847.7_1	NM_019073	diencephalon, cerebellum, occipital_lobe, frontal_cortex, temporal_lobe	ANNOTATED, CDS, coding, INTERNAL, OVCODE, OVEXON	Rybak2015	1.22551	2.33837	0.387531	0.683729	7.26616	6.04066	0	54.8414	185.377	71.7719	0	0	0	0	376.946	388.194
hsa_circ_0008981	chr1:50956259-51001129:-	FAF1	circBase	248	3	44870	chr1:50941351-50956259|chr1:51001129-51005263	ENSG00000185104.19_3	ENST00000396153.6_2	NM_007051	Hs68_RNase, Hs68_control, K562, Ag04450, diencephalon, cerebellum, occipital_lobe, frontal_cortex, parietal_lobe, temporal_lobe, WAS2, platelets	ANNOTATED, CDS, coding, INTERNAL, OVCODE, OVEXON	Jeck2013, Maass2017, Rybak2015, Salzman2013	-1.70754	0.306181	0.0937223	0.369598	6.24121	7.94875	383.919	191.945	231.721	251.202	146.599	0	0	73.8999	150.778	155.278
hsa_circ_0004619	chr1:51121113-51210447:-	FAF1	circBase	377	4	89334	chr1:51061888-51121113|chr1:51210447-51253671	ENSG00000185104.19_3	ENST00000396153.6_2	NM_007051	Hs68_RNase, Hs68_control, K562, Helas3, Gm12878, diencephalon, cerebellum, occipital_lobe, frontal_cortex, parietal_lobe, temporal_lobe	ANNOTATED, CDS, coding, INTERNAL, OVCODE, OVEXON	Jeck2013, Rybak2015, Salzman2013	-0.321931	0.799998	0.728769	0.902918	7.37032	7.69226	95.9797	164.524	324.409	394.745	36.6497	287.073	254.998	73.8999	0	155.278
hsa_circ_0005567	chr1:51868106-51874004:-	EPS15	circBase	607	4	5898	chr1:51866625-51868106|chr1:51874004-51875206	ENSG00000085832.16_4	ENST00000371733.7_1	NM_001981	Hs68_RNase, Hs68_control, Nhek, K562, Hepg2, H1hesc, Gm12878, Bj, Ag04450, A549, Sknshra, SY5Y_exp2_D0, diencephalon, cerebellum, Sy5y_exp1_D0, occipital_lobe, frontal_cortex, Sy5y_exp1_D2, parietal_lobe, temporal_lobe, WAS2, LCL, platelets	ANNOTATED, CDS, coding, INTERNAL, OVCODE, OVEXON	Jeck2013, Maass2017, Rybak2015, Salzman2013	-0.624961	0.648437	0.459419	0.737096	7.81225	8.43721	191.959	164.524	231.721	645.947	476.446	287.073	191.248	73.8999	301.557	232.916
hsa_circ_0009076	chr1:52293467-52299842:-	NRD1	circBase	228	2	6375	chr1:52291054-52293467|chr1:52299842-52301802	ENSG00000078618.21_3	ENST00000352171.11_1	NM_002525	Hs68_RNase, Hs68_control, Nhek, K562, Huvec, Hepg2, Helas3, H1hesc, Gm12878, Bj, Ag04450, A549, Sknshra, diencephalon, cerebellum, Sy5y_exp1_D0, occipital_lobe, frontal_cortex, parietal_lobe, temporal_lobe, SY5Y_exp2_D4, cortex, vena_cava, umbilical_cord, muscle, fibroblasts, platelets	ANNOTATED, CDS, coding, INTERNAL, OVCODE, OVEXON	Jeck2013, Maass2017, Rybak2015, Salzman2013	0.12499	1.0905	0.877995	0.976731	8.68872	8.56373	607.871	191.945	185.377	287.087	586.395	478.455	127.499	443.399	678.503	310.555
hsa_circ_0003632	chr1:52959282-52975384:-	ZCCHC11	circBase	436	4	16102	chr1:52956473-52959282|chr1:52975384-52981562	ENSG00000134744.13_3	ENST00000257177.8_1	NM_001009881	Hs68_RNase, Hs68_control, SY5Y_exp2_D0, diencephalon, Sy5y_exp1_D4, cerebellum, Sy5y_exp1_D0, occipital_lobe, frontal_cortex, Sy5y_exp1_D2, parietal_lobe, SY5Y_exp2_D8, temporal_lobe, SY5Y_exp2_D4, WAS2, adipose, vena_cava, platelets	ANNOTATED, CDS, coding, INTERNAL, OVCODE, OVEXON	Jeck2013, Maass2017, Rybak2015	-1.1427	0.452911	0.0712821	0.326609	9.37413	10.5168	2079.56	1864.61	648.819	1471.32	1209.44	430.609	1338.74	443.399	452.335	621.11
hsa_circ_0012553	chr1:52981562-52992045:-	ZCCHC11	circBase	975	2	10483	chr1:52975384-52981562|chr1:52992045-53018602	ENSG00000134744.13_3	ENST00000257177.8_1	NM_001009881	Nhek, K562, Gm12878, Bj, Ag04450, Sknshra, SY5Y_exp2_D0, diencephalon, Sy5y_exp1_D4, cerebellum, Sy5y_exp1_D0, occipital_lobe, frontal_cortex, Sy5y_exp1_D2, parietal_lobe, temporal_lobe, SY5Y_exp2_D4, vena_cava	ANNOTATED, CDS, coding, INTERNAL, OVCODE, OVEXON, UTR5	Maass2017, Rybak2015, Salzman2013	-0.280722	0.823179	0.845321	0.962354	7.3567	7.63743	159.966	329.049	139.033	143.544	183.248	95.691	318.747	147.8	150.778	77.6388
hsa_circ_0113627	chr1:53699213-53701307:-	MAGOH	circBase	170	2	2094	chr1:53694626-53699213|chr1:53701307-53704032	ENSG00000162385.10_2	ENST00000371470.7_1	NM_002370	diencephalon, cerebellum, occipital_lobe, frontal_cortex, parietal_lobe, temporal_lobe	ANNOTATED, CDS, coding, INTERNAL, OVCODE, OVEXON	Rybak2015	0.0002628	1.00018	1	1	7.65554	7.65528	351.926	356.469	0	143.544	109.949	0	318.747	73.8999	603.114	0
hsa_circ_0002079	chr1:54059780-54065951:-	GLIS1	circBase	1061	2	6171	chr1:53995625-54059780|chr1:54065951-54199576	ENSG00000174332.5_2	ENST00000312233.4_1	NM_147193	Hs68_RNase, Hs68_control	ANNOTATED, CDS, coding, INTERNAL, OVCODE, OVEXON, UTR5	Jeck2013	-1.53667	0.34468	0.216883	0.542103	7.04157	8.57824	31.9932	0	46.3442	1220.12	586.395	526.3	63.7494	0	0	0
hsa_circ_0012697	chr1:55589119-55600086:-	USP24	circBase	1075	8	10967	chr1:55587179-55589119|chr1:55600086-55603187	ENSG00000162402.13_2	ENST00000294383.6_1	NM_015306	Ag04450, diencephalon, cerebellum, occipital_lobe, frontal_cortex, parietal_lobe, temporal_lobe	ANNOTATED, CDS, coding, INTERNAL, OVCODE, OVERLAPTX, OVEXON	Rybak2015, Salzman2013	-3.51222	0.0876427	0.0127512	0.145037	4.26955	7.78177	319.932	301.628	0	179.43	256.548	0	0	0	0	77.6388
hsa_circ_0006281	chr1:58971731-59000003:-	OMA1	circBase	636	5	28272	chr1:58939640-58971731|chr1:59000003-59002184	ENSG00000162600.11_3	ENST00000421528.6_1	NM_145243	Hs68_RNase, Hs68_control, Nhek, K562, Sknshra, diencephalon, cerebellum, occipital_lobe, frontal_cortex, parietal_lobe, temporal_lobe	ANNOTATED, CDS, coding, INTERNAL, OVCODE, OVEXON	Jeck2013, Rybak2015, Salzman2013	2.94959	7.72528	0.0110784	0.136056	8.70285	5.75326	0	0	231.721	35.8859	0	0	127.499	960.698	376.946	621.11
hsa_circ_0000072	chr1:58971731-59002413:-	OMA1	circBase	865	6	30682	chr1:58939640-58971731|chr1:59002413-59004466	ENSG00000162600.11_3	ENST00000421528.6_1	NM_145243	HEK293, cd_19, Hs68_RNase, Hs68_control, K562, Hepg2, Helas3, H1hesc, Gm12878, Bj, Ag04450, A549, Sknshra, Mcf7, diencephalon, cerebellum, occipital_lobe, frontal_cortex, Sy5y_exp1_D2, parietal_lobe, temporal_lobe, WAS2, vena_cava, right_atrium	ANNOTATED, CDS, coding, INTERNAL, OVCODE, OVEXON	Jeck2013, Maass2017, Memczak2013, Rybak2015, Salzman2013	0.653369	1.57284	0.507013	0.768755	7.98851	7.33515	0	0	370.753	287.087	146.599	95.691	191.248	665.099	150.778	155.278
hsa_circ_0002316	chr1:58971731-59004982:-	OMA1	circBase	1381	7	33251	chr1:58946846-58971731|chr1:59004982-59012374	ENSG00000162600.11_3	ENST00000371226.7_1	NM_145243	Hs68_RNase, Hs68_control, Nhek, K562, Hepg2, Helas3, H1hesc, Gm12878, Bj, SY5Y_exp2_D0, diencephalon, Sy5y_exp1_D4, cerebellum, occipital_lobe, frontal_cortex, parietal_lobe, temporal_lobe, WAS2	ANNOTATED, CDS, coding, INTERNAL, OVCODE, OVEXON, UTR5	Jeck2013, Maass2017, Rybak2015, Salzman2013	-0.807672	0.571303	0.385354	0.68319	7.51638	8.32405	511.892	356.469	417.098	287.087	0	95.691	127.499	73.8999	452.335	155.278
hsa_circ_0000075	chr1:59787207-59812070:+	FGGY	circBase	479	3	24863	chr1:59762579-59787207|chr1:59812070-59844420	ENSG00000172456.17_2	ENST00000413489.5_1	NM_018291	cd_19, neutr, Hs68_RNase, Hs68_control, K562, Hepg2, Helas3, H1hesc, Gm12878, Bj, Ag04450, A549, Sknshra, diencephalon, cerebellum, Sy5y_exp1_D0, occipital_lobe, frontal_cortex, Sy5y_exp1_D2, parietal_lobe, temporal_lobe, WAS2, cortex, LCL	ANNOTATED, CDS, coding, INTERNAL, OVCODE, OVEXON, UTR5	Jeck2013, Maass2017, Memczak2013, Rybak2015, Salzman2013	0.417162	1.3353	0.520542	0.774216	9.74634	9.32918	287.939	603.256	973.228	681.833	659.694	382.764	892.492	886.798	1206.23	931.665
hsa_circ_0005354	chr1:59787207-59844509:+	FGGY	circBase	568	4	57302	chr1:59762822-59787207|chr1:59844509-59922632	ENSG00000172456.17_2	ENST00000371218.8_1	NM_001113411	Hs68_RNase, Hs68_control, Nhek, K562, Huvec, Hsmm, Hepg2, Helas3, H1hesc, Gm12878, Bj, Ag04450, A549, Sknshra, diencephalon, cerebellum, occipital_lobe, frontal_cortex, Sy5y_exp1_D2, parietal_lobe, temporal_lobe, WAS2, vena_cava	ANNOTATED, CDS, coding, INTERNAL, OVCODE, OVEXON, UTR5	Jeck2013, Maass2017, Rybak2015, Salzman2013	0.114798	1.08282	0.876857	0.976731	9.55756	9.44276	895.81	877.463	278.065	645.947	732.994	1004.76	956.241	443.399	301.557	1009.3
hsa_circ_0006633	chr1:59805629-59844509:+	FGGY	circBase	353	3	38880	chr1:59762579-59805629|chr1:59844509-59922632	ENSG00000172456.17_2	ENST00000634606.1_1	NM_001113411	Hs68_RNase, Hs68_control, Nhek, K562, H1hesc, Gm12878, Ag04450, diencephalon, cerebellum, occipital_lobe, frontal_cortex, parietal_lobe, temporal_lobe, decidua, vena_cava, right_atrium	ANNOTATED, CDS, coding, INTERNAL, OVCODE, OVEXON	Jeck2013, Maass2017, Rybak2015, Salzman2013	-0.308637	0.807404	0.665583	0.867947	8.95256	9.26119	1087.77	712.939	463.442	466.517	293.197	382.764	701.244	369.499	301.557	698.749
hsa_circ_0113730	chr1:60366636-60381772:-	CYP2J2	circBase	1120	7	15136	chr1:60359501-60366636|chr1:60381772-60392208	ENSG00000134716.9_2	ENST00000371204.3_1	ENST00000371204.3	diencephalon, cerebellum	ANNOTATED, CDS, coding, INTERNAL, OVCODE, OVEXON	Rybak2015	-0.987931	0.5042	0.329657	0.631435	7.05074	8.03867	63.9865	0	741.507	71.7719	439.796	191.382	127.499	0	150.778	155.278
hsa_circ_0113746	chr1:61291007-61292257:-	TCONS_00000081	circBase	214	2	1250	chr1:61199194-61291007|chr1:61292257-61333588	ENSG00000231252.2_3	ENST00000635290.1_1	TCONS_00000081	diencephalon, cerebellum, occipital_lobe, frontal_cortex, temporal_lobe	ALT_ACCEPTOR, ncRNA, OVEXON, upstream_start	Rybak2015	2.63697	6.22025	0.0171719	0.161817	8.26548	5.6285	63.9865	0	92.6884	71.7719	0	47.8455	637.494	0	603.114	232.916
hsa_circ_0012823	chr1:63269389-63286880:+	ATG4C	circBase	864	5	17491	chr1:63249944-63269389|chr1:63286880-63294710	ENSG00000125703.14_2	ENST00000317868.8_1	NM_032852	K562, diencephalon, Sy5y_exp1_D4, cerebellum, occipital_lobe, frontal_cortex, Sy5y_exp1_D2, parietal_lobe, temporal_lobe, cortex, platelets	ANNOTATED, CDS, coding, INTERNAL, OVCODE, OVEXON, UTR5	Maass2017, Rybak2015, Salzman2013	-0.940327	0.521115	0.342622	0.642914	7.02583	7.96616	287.939	27.4207	185.377	322.973	403.147	430.609	0	147.8	0	0
hsa_circ_0012824	chr1:63269389-63307218:+	ATG4C	circBase	1277	9	37829	chr1:63249944-63269389|chr1:63307218-63329662	ENSG00000125703.14_2	ENST00000317868.8_1	NM_032852	K562, diencephalon, cerebellum, occipital_lobe, frontal_cortex, parietal_lobe, temporal_lobe, platelets	ANNOTATED, CDS, coding, INTERNAL, OVCODE, OVEXON, UTR5	Maass2017, Rybak2015, Salzman2013	-2.53062	0.173065	0.000824117	0.0356579	7.38679	9.91741	1119.76	850.042	1761.08	251.202	842.943	95.691	127.499	295.599	150.778	155.278
hsa_circ_0002454	chr1:65830317-65831879:+	DNAJC6	circBase	350	3	1562	chr1:65720332-65830317|chr1:65831879-65845084	ENSG00000116675.15_2	ENST00000494710.6_1	NM_014787	Hs68_RNase, Hs68_control, Nhek, K562, Huvec, Hepg2, Helas3, H1hesc, Gm12878, Bj, A549, Sknshra, SY5Y_exp2_D0, diencephalon, Sy5y_exp1_D4, cerebellum, Sy5y_exp1_D0, occipital_lobe, frontal_cortex, Sy5y_exp1_D2, parietal_lobe, SY5Y_exp2_D8, temporal_lobe, SY5Y_exp2_D4, umbilical_cord, muscle, platelets	ANNOTATED, CDS, coding, INTERNAL, OVCODE, OVEXON	Jeck2013, Maass2017, Rybak2015, Salzman2013	-1.70617	0.306473	0.015746	0.15637	9.77737	11.4835	1023.78	932.304	8017.54	1471.32	2895.33	1483.21	446.246	886.798	1206.23	310.555
hsa_circ_0008433	chr1:66378927-66384518:+	PDE4B	circBase	351	2	5591	chr1:66258313-66378927|chr1:66384518-66713142	ENSG00000184588.17_3	ENST00000329654.8_1	NM_001037341	Hs68_RNase, Hs68_control, K562, Bj, Ag04450, Sknshra, diencephalon, cerebellum, Sy5y_exp1_D0, occipital_lobe, frontal_cortex, Sy5y_exp1_D2, parietal_lobe, temporal_lobe, cortex, osteocytes	ANNOTATED, CDS, coding, INTERNAL, OVCODE, OVEXON, UTR5	Jeck2013, Maass2017, Rybak2015, Salzman2013	-1.25034	0.420349	0.0617665	0.306694	9.19468	10.445	1151.76	1590.4	1390.33	610.061	2198.98	1483.21	446.246	591.199	150.778	155.278
hsa_circ_0006677	chr1:67356836-67371058:-	WDR78	circBase	473	3	14222	chr1:67340620-67356836|chr1:67371058-67390344	ENSG00000152763.16_2	ENST00000371026.7_1	NM_024763	Hs68_RNase, Hs68_control, Nhek, K562, H1hesc, Gm12878, Bj, Ag04450, A549, Sknshra, diencephalon, cerebellum, occipital_lobe, frontal_cortex, Sy5y_exp1_D2, parietal_lobe, SY5Y_exp2_D8, temporal_lobe, SY5Y_exp2_D4, adipose, decidua, vena_cava, right_atrium, muscle, platelets	ANNOTATED, CDS, coding, INTERNAL, OVCODE, OVEXON	Jeck2013, Maass2017, Rybak2015, Salzman2013	1.40326	2.64499	0.0438425	0.257195	11.0446	9.64137	351.926	301.628	1900.11	717.719	732.994	861.219	2741.23	3694.99	2789.4	465.833
hsa_circ_0113954	chr1:67423741-67428843:+	MIER1	circBase	433	4	5102	chr1:67405735-67423741|chr1:67428843-67436490	ENSG00000198160.14_2	ENST00000355977.10_1	NM_001146110	SY5Y_exp2_D0, diencephalon, cerebellum, Sy5y_exp1_D0, occipital_lobe, frontal_cortex, Sy5y_exp1_D2, parietal_lobe, temporal_lobe	ANNOTATED, CDS, coding, INTERNAL, OVCODE, OVEXON	Rybak2015	-0.813486	0.569005	0.244709	0.57032	8.54598	9.35947	287.939	438.731	1251.29	645.947	659.694	621.991	63.7494	221.7	452.335	465.833
hsa_circ_0000085	chr1:70758070-70781249:-	ANKRD13C	circBase	638	6	23179	chr1:70742527-70758070|chr1:70781249-70790535	ENSG00000118454.12_2	ENST00000370944.8_1	NM_030816	cd_19, K562, Hsmm, Bj, Sknshra, SY5Y_exp2_D0, diencephalon, Sy5y_exp1_D4, cerebellum, Sy5y_exp1_D0, occipital_lobe, frontal_cortex, Sy5y_exp1_D2, parietal_lobe, temporal_lobe, WAS2, adipose, vena_cava, right_atrium, platelets	ANNOTATED, CDS, coding, INTERNAL	Maass2017, Memczak2013, Rybak2015, Salzman2013	0.541863	1.45585	0.548693	0.791909	7.83148	7.28961	159.966	164.524	139.033	251.202	36.6497	239.227	127.499	591.199	150.778	0
hsa_circ_0008129	chr1:76205664-76216231:+	ACADM	circBase	477	4	10567	chr1:76200556-76205664|chr1:76216231-76226806	ENSG00000117054.13_3	ENST00000541113.5_1	NM_001127328	Hs68_RNase, Hs68_control, diencephalon, cerebellum, occipital_lobe, frontal_cortex, parietal_lobe, temporal_lobe, WAS2, cortex, right_atrium, LCL, platelets	ANNOTATED, CDS, coding, INTERNAL, OVCODE, OVEXON	Jeck2013, Maass2017, Rybak2015	-1.30336	0.405183	0.0733696	0.331769	8.09637	9.39973	671.858	877.463	556.13	502.403	732.994	382.764	191.248	147.8	603.114	0
hsa_circ_0114166	chr1:78097534-78107340:-	ZZZ3	circBase	1907	4	9806	chr1:78050340-78097534|chr1:78107340-78148269	ENSG00000036549.12_3	ENST00000370801.7_1	ENST00000370801.3	diencephalon, cerebellum, occipital_lobe, frontal_cortex, parietal_lobe, temporal_lobe	ANNOTATED, CDS, coding, INTERNAL, OVCODE, OVEXON, UTR5	Rybak2015	-0.249909	0.84095	0.774783	0.929164	8.34123	8.59114	607.871	274.207	556.13	322.973	146.599	287.073	254.998	443.399	150.778	465.833
hsa_circ_0005374	chr1:78177431-78181553:-	USP33	circBase	488	4	4122	chr1:78167156-78177431|chr1:78181553-78183551	ENSG00000077254.14_4	ENST00000370794.7_1	NM_015017	Hs68_RNase, Hs68_control, Hsmm, diencephalon, Sy5y_exp1_D4, cerebellum, occipital_lobe, frontal_cortex, parietal_lobe, temporal_lobe, WAS2, platelets	ANNOTATED, CDS, coding, INTERNAL, OVCODE, OVEXON	Jeck2013, Maass2017, Rybak2015, Salzman2013	0.0697638	1.04954	1	1	7.58886	7.51909	319.932	109.683	324.409	107.658	36.6497	287.073	318.747	73.8999	150.778	77.6388
hsa_circ_0000087	chr1:78183551-78191447:-	USP33	circBase	783	7	7896	chr1:78181553-78183551|chr1:78191447-78193979	ENSG00000077254.14_4	ENST00000370794.7_1	NM_201624	cd_19, Hs68_RNase, Hs68_control, Nhek, K562, Hepg2, Helas3, H1hesc, Gm12878, Bj, Ag04450, A549, Sknshra, Mcf7, diencephalon, cerebellum, occipital_lobe, frontal_cortex, parietal_lobe, temporal_lobe, WAS2	ANNOTATED, CDS, coding, INTERNAL, OVCODE, OVEXON	Jeck2013, Maass2017, Memczak2013, Rybak2015, Salzman2013	-1.57526	0.335582	0.0615053	0.306548	6.75243	8.32769	351.926	329.049	278.065	358.859	256.548	143.536	127.499	147.8	75.3892	0
hsa_circ_0002570	chr1:78267015-78280916:+	FAM73A	circBase	700	5	13901	chr1:78249036-78267015|chr1:78280916-78308991	ENSG00000180488.14_3	ENST00000370791.7_1	NM_198549	Hs68_RNase, Hs68_control, K562, Hepg2, Gm12878, Ag04450, Sknshra, diencephalon, cerebellum, Sy5y_exp1_D0, occipital_lobe, frontal_cortex, Sy5y_exp1_D2, parietal_lobe, temporal_lobe, vena_cava, platelets	ANNOTATED, CDS, coding, INTERNAL, OVCODE, OVEXON	Jeck2013, Maass2017, Rybak2015, Salzman2013	-0.132105	0.912499	0.898909	0.988073	8.83681	8.96891	639.865	493.573	695.163	287.087	366.497	143.536	701.244	221.7	980.06	232.916
hsa_circ_0006354	chr1:7837219-7838229:+	VAMP3	circBase	211	2	1010	chr1:7833571-7837219|chr1:7838229-7839685	ENSG00000049245.12_3	ENST00000054666.10_1	NM_004781	Hs68_RNase, Hs68_control, SY5Y_exp2_D0, diencephalon, Sy5y_exp1_D4, cerebellum, Sy5y_exp1_D0, occipital_lobe, frontal_cortex, Sy5y_exp1_D2, parietal_lobe, SY5Y_exp2_D8, temporal_lobe, SY5Y_exp2_D4, EPC, chondrocytes, WAS2, cortex, adipose, decidua, VSMC, vena_cava, right_atrium, umbilical_cord, muscle, LCL, neutophils, platelets, MSC	ANNOTATED, CDS, coding, INTERNAL, OVCODE, OVEXON	Jeck2013, Maass2017, Rybak2015	0.319902	1.24825	0.583006	0.814127	11.0074	10.6875	2015.57	2796.91	1019.57	1148.35	1209.44	1148.29	2613.73	1478	2487.85	2562.08
hsa_circ_0114230	chr1:7895821-7897209:+	PER3	circBase	335	2	1388	chr1:7890221-7895821|chr1:7897209-7902731	ENSG00000049246.14_2	ENST00000613533.4_1	ENST00000377532.3	diencephalon, cerebellum, occipital_lobe, frontal_cortex, parietal_lobe, temporal_lobe	ANNOTATED, CDS, coding, INTERNAL, OVCODE, OVEXON	Rybak2015	-1.44308	0.367781	0.135651	0.42953	6.84465	8.28773	479.898	740.359	185.377	107.658	0	239.227	127.499	0	75.3892	77.6388
hsa_circ_0114278	chr1:84376847-84412965:-	TTLL7	circBase	1848	11	36118	chr1:84373344-84376847|chr1:84412965-84414310	ENSG00000137941.16_3	ENST00000472688.5_1	ENST00000477524.1	SY5Y_exp2_D0, diencephalon, cerebellum, occipital_lobe, frontal_cortex, parietal_lobe, temporal_lobe	ANNOTATED, INTERNAL, ncRNA, OVCODE, OVERLAPTX, OVEXON	Rybak2015	-0.798649	0.574887	0.332196	0.632261	7.94524	8.74389	319.932	191.945	231.721	897.148	476.446	430.609	0	73.8999	376.946	310.555
hsa_circ_0114304	chr1:84644859-84650865:+	PRKACB	circBase	373	4	6006	chr1:84544054-84644859|chr1:84650865-84662298	ENSG00000142875.19_3	ENST00000370689.6_1	ENST00000370689.2	diencephalon, cerebellum, occipital_lobe, frontal_cortex, parietal_lobe, temporal_lobe	ANNOTATED, CDS, coding, INTERNAL, OVCODE, OVERLAPTX, OVEXON	Rybak2015	-1.66917	0.314435	0.0665738	0.316563	7.11552	8.78469	223.953	301.628	278.065	861.262	513.096	526.3	0	0	0	77.6388
hsa_circ_0114305	chr1:84644859-84663507:+	PRKACB	circBase	596	6	18648	chr1:84544054-84644859|chr1:84663507-84668365	ENSG00000142875.19_3	ENST00000370689.6_1	ENST00000370689.2	diencephalon, occipital_lobe, frontal_cortex, parietal_lobe, temporal_lobe	ANNOTATED, CDS, coding, INTERNAL, OVCODE, OVERLAPTX, OVEXON	Rybak2015	-3.1146	0.115455	0.000461981	0.0259312	6.31096	9.42556	479.898	274.207	556.13	825.376	1282.74	191.382	0	147.8	0	0
hsa_circ_0004083	chr1:84644859-84680000:+	PRKACB	circBase	884	8	35141	chr1:84544054-84644859|chr1:84680000-84700862	ENSG00000142875.19_3	ENST00000370689.6_1	NM_002731	Hs68_RNase, Hs68_control, Nhek, diencephalon, cerebellum, occipital_lobe, frontal_cortex, Sy5y_exp1_D2, parietal_lobe, temporal_lobe	ANNOTATED, CDS, coding, INTERNAL, OVCODE, OVEXON	Jeck2013, Rybak2015, Salzman2013	-1.25622	0.418638	0.0778076	0.344596	8.26925	9.52547	383.919	493.573	1390.33	681.833	732.994	669.837	127.499	443.399	150.778	77.6388
hsa_circ_0114321	chr1:85121514-85136991:-	SSX2IP	circBase	1478	10	15477	chr1:85117680-85121514|chr1:85136991-85156053	ENSG00000117155.16_3	ENST00000342203.7_1	NM_001166417	SY5Y_exp2_D0, diencephalon, cerebellum, occipital_lobe, frontal_cortex, parietal_lobe, temporal_lobe	ANNOTATED, CDS, coding, INTERNAL, OVCODE, OVEXON, UTR5	Rybak2015	-1.57942	0.334616	0.11042	0.394298	6.37722	7.95664	287.939	219.366	231.721	71.7719	403.147	334.918	0	0	0	0
hsa_circ_0009576	chr1:8525984-8617582:-	RERE	circBase	681	7	91598	chr1:8482867-8525984|chr1:8617582-8674619	ENSG00000142599.17_4	ENST00000337907.7_3	NM_012102	A549, diencephalon, cerebellum, occipital_lobe, frontal_cortex, parietal_lobe, temporal_lobe	ANNOTATED, CDS, coding, INTERNAL, OVCODE, OVERLAPTX, OVEXON	Rybak2015, Salzman2013	-1.82885	0.281488	0.0843963	0.356189	5.95464	7.78349	63.9865	191.945	92.6884	466.517	256.548	239.227	0	0	0	0
hsa_circ_0006837	chr1:8555122-8617582:-	RERE	circBase	582	6	62460	chr1:8526083-8555122|chr1:8617582-8674619	ENSG00000142599.17_4	ENST00000337907.7_3	NM_012102	Hs68_RNase, Hs68_control, K562, Hepg2, Helas3, H1hesc, Gm12878, Bj, Ag04450, A549, Sknshra, diencephalon, cerebellum, occipital_lobe, frontal_cortex, Sy5y_exp1_D2, parietal_lobe, temporal_lobe, WAS2	ANNOTATED, CDS, coding, INTERNAL, OVCODE, OVEXON	Jeck2013, Maass2017, Rybak2015, Salzman2013	-1.29467	0.407629	0.124465	0.415469	7.63438	8.92905	63.9865	219.366	509.786	968.92	659.694	430.609	191.248	0	150.778	155.278
hsa_circ_0009117	chr1:8555122-8674745:-	RERE	circBase	708	7	119623	chr1:8526083-8555122|chr1:8674745-8684368	ENSG00000142599.17_4	ENST00000337907.7_3	NM_012102	Hs68_RNase, Hs68_control, Nhek, K562, Huvec, Hsmm, Hepg2, Helas3, H1hesc, Gm12878, Bj, Ag04450, A549, Nhlf, Sknshra, Mcf7	ANNOTATED, CDS, coding, INTERNAL, OVCODE, OVEXON	Jeck2013, Salzman2013	-0.113982	0.924034	0.899568	0.988377	8.74439	8.85838	191.959	685.518	880.539	215.316	329.847	813.373	573.745	0	376.946	310.555
hsa_circ_0005829	chr1:8568685-8617582:-	RERE	circBase	357	4	48897	chr1:8557589-8568685|chr1:8617582-8674619	ENSG00000142599.17_4	ENST00000337907.7_3	NM_012102	Hs68_RNase, Hs68_control, diencephalon, cerebellum, occipital_lobe, frontal_cortex, parietal_lobe, temporal_lobe, cortex	ANNOTATED, CDS, coding, INTERNAL, OVCODE, OVEXON	Jeck2013, Maass2017, Rybak2015	-1.58081	0.334294	0.0955148	0.370594	6.63762	8.21843	127.973	82.2622	463.442	143.544	659.694	239.227	191.248	0	0	0
hsa_circ_0004607	chr1:85816097-85824530:-	DDAH1	circBase	294	3	8433	chr1:85790566-85816097|chr1:85824530-85961848	ENSG00000153904.18_3	ENST00000535924.6_1	NM_001134445	Hs68_RNase, Hs68_control, diencephalon, frontal_cortex, parietal_lobe, temporal_lobe	ANNOTATED, CDS, coding, INTERNAL, OVCODE, OVEXON, UTR5	Jeck2013, Rybak2015	1.78046	3.43535	0.20304	0.528386	7.51017	5.72971	0	219.366	0	0	0	95.691	254.998	73.8999	0	465.833
hsa_circ_0002158	chr1:8601272-8617582:-	RERE	circBase	308	3	16310	chr1:8568734-8601272|chr1:8617582-8674619	ENSG00000142599.17_4	ENST00000337907.7_3	NM_012102	Hs68_RNase, Hs68_control, Nhek, K562, Huvec, Hepg2, Helas3, H1hesc, Gm12878, Ag04450, A549, Sknshra, SY5Y_exp2_D0, diencephalon, Sy5y_exp1_D4, cerebellum, Sy5y_exp1_D0, occipital_lobe, frontal_cortex, Sy5y_exp1_D2, parietal_lobe, temporal_lobe, SY5Y_exp2_D4, WAS2, ada_scid, cortex, platelets	ANNOTATED, CDS, coding, INTERNAL, OVCODE, OVEXON	Jeck2013, Maass2017, Rybak2015, Salzman2013	-1.57869	0.334785	0.0549839	0.290625	8.67287	10.2516	1343.72	1096.83	1343.98	1148.35	1136.14	1531.06	318.747	73.8999	0	0
hsa_circ_0008501	chr1:8601272-8674745:-	RERE	circBase	434	4	73473	chr1:8568734-8601272|chr1:8674745-8684368	ENSG00000142599.17_4	ENST00000337907.7_3	NM_012102	Hs68_RNase, Hs68_control, Nhek, K562, Huvec, Hepg2, Helas3, H1hesc, Gm12878, Bj, Ag04450, A549, Sknshra, Mcf7, diencephalon, cerebellum, Sy5y_exp1_D0, occipital_lobe, frontal_cortex, Sy5y_exp1_D2, parietal_lobe, temporal_lobe, SY5Y_exp2_D4, cortex, vena_cava, platelets	ANNOTATED, CDS, coding, INTERNAL, OVCODE, OVEXON	Jeck2013, Maass2017, Rybak2015, Salzman2013	-0.813036	0.569183	0.270414	0.58858	8.1722	8.98524	351.926	575.835	185.377	574.175	806.293	334.918	382.497	147.8	301.557	232.916
hsa_circ_0114356	chr1:8716031-8716500:-	RERE	circBase	469	1	469	chr1:8684439-8716031|chr1:8716500-8852462	ENSG00000142599.17_4	ENST00000337907.7_3	NM_012102	diencephalon, cerebellum, occipital_lobe, frontal_cortex, parietal_lobe, temporal_lobe	ANNOTATED, CDS, coding, INTERNAL, OVCODE, OVEXON, UTR5	Rybak2015	-1.47659	0.359338	0.0541057	0.28745	7.85387	9.33045	415.912	603.256	1065.92	717.719	403.147	430.609	0	369.499	150.778	155.278
hsa_circ_0013093	chr1:89206670-89251896:+	PKN2	circBase	1233	7	45226	chr1:89150311-89206670|chr1:89251896-89270073	ENSG00000065243.19_3	ENST00000316005.11_1	NM_006256	Nhek, K562, diencephalon, cerebellum, occipital_lobe, frontal_cortex, parietal_lobe, temporal_lobe, vena_cava, right_atrium, platelets	ANNOTATED, CDS, coding, INTERNAL, OVCODE, OVEXON	Maass2017, Rybak2015, Salzman2013	-1.12018	0.460035	0.230541	0.556315	7.11036	8.23054	479.898	191.945	556.13	71.7719	183.248	334.918	0	0	301.557	0
hsa_circ_0005900	chr1:89236034-89251896:+	PKN2	circBase	777	5	15862	chr1:89226059-89236034|chr1:89251896-89270073	ENSG00000065243.19_3	ENST00000316005.11_1	NM_006256	Hs68_RNase, Hs68_control, Helas3, Bj, Ag04450, Sknshra, diencephalon, Sy5y_exp1_D4, cerebellum, Sy5y_exp1_D0, occipital_lobe, frontal_cortex, Sy5y_exp1_D2, parietal_lobe, temporal_lobe, adipose, vena_cava, platelets	ANNOTATED, CDS, coding, INTERNAL, OVCODE, OVEXON	Jeck2013, Maass2017, Rybak2015, Salzman2013	-1.51899	0.348929	0.100043	0.375087	6.94359	8.46259	479.898	548.414	370.753	35.8859	293.197	95.691	254.998	0	0	232.916
hsa_circ_0114428	chr1:91403041-91447927:-	ZNF644	circBase	3705	3	44886	chr1:91383711-91403041|chr1:91447927-91486829	ENSG00000122482.20_2	ENST00000370440.5_1	NM_201269	diencephalon, cerebellum, Sy5y_exp1_D0, occipital_lobe, frontal_cortex, Sy5y_exp1_D2, parietal_lobe, temporal_lobe	ANNOTATED, CDS, coding, INTERNAL, OVCODE, OVERLAPTX, OVEXON, UTR5	Rybak2015	-0.443945	0.735122	0.588295	0.819122	7.435	7.87894	319.932	219.366	324.409	215.316	73.2994	191.382	254.998	147.8	75.3892	155.278
hsa_circ_0114444	chr1:91808986-91818856:-	HFM1	circBase	650	7	9870	chr1:91790323-91808986|chr1:91818856-91840914	ENSG00000162669.15_2	ENST00000370425.7_1	NM_001017975	diencephalon, cerebellum, occipital_lobe, frontal_cortex, parietal_lobe, temporal_lobe	ANNOTATED, CDS, coding, INTERNAL, OVCODE, OVEXON	Rybak2015	0.207083	1.15435	0.941879	1	7.53468	7.3276	191.959	383.89	0	0	183.248	47.8455	764.993	0	75.3892	0
hsa_circ_0006622	chr1:92327027-92327201:-	TGFBR3	circBase	174	1	174	chr1:92263028-92327027|chr1:92327201-92351434	ENSG00000069702.10_2	ENST00000212355.8_1	NR_036634	Hs68_RNase, Hs68_control, Helas3, cerebellum, osteocytes, adipose, decidua, vena_cava, fibroblasts	ANNOTATED, INTERNAL, ncRNA, OVCODE, OVEXON	Jeck2013, Maass2017, Rybak2015, Salzman2013	1.46794	2.76626	0.286782	0.597629	7.75195	6.28402	0	0	0	143.544	219.898	0	0	0	452.335	621.11
hsa_circ_0004463	chr1:92798947-92811471:+	RPAP2	circBase	233	3	12524	chr1:92789932-92798947|chr1:92811471-92846280	ENSG00000122484.8_2	ENST00000610020.1_1	NM_024813	Hs68_RNase, Hs68_control, Nhek, K562, Hepg2, Helas3, H1hesc, Gm12878, Ag04450, A549, Sknshra, Mcf7, diencephalon, cerebellum, occipital_lobe, frontal_cortex, Sy5y_exp1_D2, parietal_lobe, SY5Y_exp2_D8, temporal_lobe, WAS2, vena_cava, platelets	ANNOTATED, CDS, coding, INTERNAL, OVCODE, OVEXON	Jeck2013, Maass2017, Rybak2015, Salzman2013	-0.35076	0.784171	0.63748	0.849316	8.90207	9.25283	1023.78	795.201	278.065	681.833	219.898	526.3	254.998	443.399	753.892	388.194
hsa_circ_0000091	chr1:92798947-92846430:+	RPAP2	circBase	383	4	47483	chr1:92789932-92798947|chr1:92846430-92852567	ENSG00000122484.8_2	ENST00000610020.1_1	NM_024813	cd_19, neutr, Hs68_RNase, Hs68_control, Nhek, K562, Huvec, Hepg2, Helas3, H1hesc, Gm12878, Bj, Ag04450, A549, Sknshra, SY5Y_exp2_D0, diencephalon, cerebellum, occipital_lobe, frontal_cortex, Sy5y_exp1_D2, parietal_lobe, temporal_lobe, SY5Y_exp2_D4, WAS2, adipose, umbilical_cord, platelets	ANNOTATED, CDS, coding, INTERNAL, OVCODE, OVEXON	Jeck2013, Maass2017, Memczak2013, Rybak2015, Salzman2013	-0.496002	0.709069	0.453542	0.731903	9.07654	9.57254	415.912	603.256	695.163	825.376	1246.09	813.373	254.998	369.499	904.671	310.555
hsa_circ_0013163	chr1:93029198-93101893:-	EVI5	circBase	774	6	72695	chr1:92979527-93029198|chr1:93101893-93131495	ENSG00000067208.14_3	ENST00000370331.5_1	NM_005665	Ag04450, diencephalon, cerebellum, occipital_lobe, frontal_cortex, parietal_lobe, temporal_lobe, platelets	ANNOTATED, CDS, coding, INTERNAL, OVCODE, OVERLAPTX, OVEXON	Maass2017, Rybak2015, Salzman2013	-1.06514	0.477927	0.209185	0.532491	7.35657	8.4217	223.953	301.628	556.13	179.43	439.796	143.536	127.499	369.499	75.3892	77.6388
hsa_circ_0013164	chr1:93029198-93170301:-	EVI5	circBase	1837	15	141103	chr1:92979527-93029198|chr1:93170301-93201954	ENSG00000067208.14_3	ENST00000370331.5_1	NM_005665	K562	ANNOTATED, CDS, coding, INTERNAL, OVCODE, OVERLAPTX, OVEXON	Salzman2013	1.67135	3.18512	0.186656	0.509457	7.00847	5.33712	63.9865	0	0	71.7719	36.6497	239.227	127.499	0	0	232.916
hsa_circ_0005371	chr1:93070863-93073284:-	EVI5	circBase	243	2	2421	chr1:93029294-93070863|chr1:93073284-93089732	ENSG00000067208.14_3	ENST00000370331.5_1	NM_005665	Hs68_RNase, Hs68_control, K562, Huvec, A549, Sknshra, diencephalon, cerebellum, occipital_lobe, frontal_cortex, parietal_lobe, temporal_lobe	ANNOTATED, CDS, coding, INTERNAL, OVCODE, OVEXON	Jeck2013, Rybak2015, Salzman2013	0.680875	1.60311	0.740734	0.910468	6.60515	5.92427	127.973	54.8414	92.6884	0	0	95.691	63.7494	147.8	150.778	0
hsa_circ_0013232	chr1:94924162-94946162:+	ABCD3	circBase	717	8	22000	chr1:94884144-94924162|chr1:94946162-94948725	ENSG00000117528.11_2	ENST00000370214.8_1	NM_002858	K562, Gm12878, diencephalon, cerebellum, occipital_lobe, frontal_cortex, parietal_lobe, temporal_lobe	ANNOTATED, CDS, coding, INTERNAL, OVCODE, OVEXON	Rybak2015, Salzman2013	-1.06183	0.479025	0.292034	0.602243	6.69757	7.7594	191.959	329.049	278.065	107.658	146.599	143.536	318.747	0	0	0
hsa_circ_0000095	chr1:95609446-95616975:+	TMEM56-RWDD3	circBase	410	4	7529	chr1:95583173-95609446|chr1:95616975-95639371	ENSG00000152078.9_3	ENST00000370203.8_1	NM_001199691	cd_19, neutr, K562, Helas3, H1hesc, A549, Sknshra, diencephalon, Sy5y_exp1_D4, cerebellum, occipital_lobe, frontal_cortex, Sy5y_exp1_D2, parietal_lobe, temporal_lobe, decidua, vena_cava, right_atrium, platelets	ANNOTATED, CDS, coding, INTERNAL, UTR5	Maass2017, Memczak2013, Rybak2015, Salzman2013	-1.11205	0.462637	0.213299	0.538538	7.02393	8.13598	127.973	493.573	92.6884	394.745	256.548	430.609	63.7494	73.8999	0	0
hsa_circ_0013270	chr1:99418625-99422297:-	LPPR5	circBase	384	2	3672	chr1:99387614-99418625|chr1:99422297-99469990	ENSG00000117598.11_2	ENST00000370188.7_1	NM_001037317	H1hesc, diencephalon, cerebellum, Sy5y_exp1_D0, occipital_lobe, frontal_cortex, parietal_lobe, temporal_lobe	ANNOTATED, CDS, coding, INTERNAL, OVCODE, OVEXON	Rybak2015, Salzman2013	-0.761181	0.590013	0.514875	0.772013	8.11582	8.87701	0	0	370.753	897.148	1062.84	909.064	254.998	73.8999	0	77.6388
hsa_circ_0000014	chr1:9991948-9994918:-	LZIC	circBase	277	3	2970	chr1:9982416-9991948|chr1:9994918-9995549	ENSG00000162441.11_2	ENST00000488540.5_1	NM_032368	HEK293, cd_34, Nhek, K562, Huvec, Hepg2, Helas3, H1hesc, Gm12878, Bj, Ag04450, A549, Sknshra, Mcf7, SY5Y_exp2_D0, diencephalon, Sy5y_exp1_D4, cerebellum, Sy5y_exp1_D0, occipital_lobe, frontal_cortex, Sy5y_exp1_D2, parietal_lobe, SY5Y_exp2_D8, temporal_lobe, WAS2, ada_scid, VSMC, vena_cava, HUAEC, neutophils, platelets, MSC	ANNOTATED, CDS, coding, INTERNAL	Maass2017, Memczak2013, Rybak2015, Salzman2013	0.797728	1.73836	0.298596	0.607698	9.24241	8.44469	351.926	356.469	463.442	143.544	403.147	287.073	701.244	1330.2	0	698.749
hsa_circ_0007803	chr1:9991948-9995685:-	LZIC	circBase	413	4	3737	chr1:9990515-9991948|chr1:9995685-9996576	ENSG00000162441.11_2	ENST00000377223.5_1	NM_032368	Hs68_RNase, Hs68_control, K562, H1hesc, Gm12878, Mcf7, diencephalon, cerebellum, occipital_lobe, frontal_cortex, parietal_lobe, temporal_lobe, platelets	ANNOTATED, CDS, coding, INTERNAL, OVCODE, OVEXON	Jeck2013, Maass2017, Rybak2015, Salzman2013	2.22586	4.6779	0.0151861	0.155597	8.75263	6.52677	95.9797	191.945	139.033	0	0	143.536	509.995	1108.5	226.168	155.278
hsa_circ_0008362	chr10:103427642-103436193:-	FBXW4	circBase	510	4	8551	chr10:103384567-103427642|chr10:103436193-103454137	ENSG00000107829.13_2	ENST00000331272.7_1	NM_022039	Hs68_RNase, Hs68_control, diencephalon, Sy5y_exp1_D4, cerebellum, Sy5y_exp1_D0, occipital_lobe, frontal_cortex, Sy5y_exp1_D2, parietal_lobe, temporal_lobe, chondrocytes, WAS2, ada_scid, cortex, vena_cava, right_atrium, LCL	ANNOTATED, CDS, coding, INTERNAL, OVCODE, OVEXON	Jeck2013, Maass2017, Rybak2015	1.13542	2.19682	0.0668815	0.317441	9.90877	8.77336	415.912	329.049	556.13	466.517	403.147	526.3	1466.24	738.999	1130.84	931.665
hsa_circ_0000255	chr10:103432671-103436193:-	FBXW4	circBase	415	3	3522	chr10:103427737-103432671|chr10:103436193-103454137	ENSG00000107829.13_2	ENST00000331272.7_1	NM_022039	cd_19, Hs68_RNase, Hs68_control, Nhek, K562, Hepg2, H1hesc, Gm12878, Bj, Ag04450, A549, Sknshra, Mcf7, diencephalon, cerebellum, Sy5y_exp1_D0, occipital_lobe, frontal_cortex, parietal_lobe, temporal_lobe	ANNOTATED, CDS, coding, INTERNAL, OVCODE, OVEXON	Jeck2013, Memczak2013, Rybak2015, Salzman2013	-0.962282	0.513244	0.259522	0.581053	8.01787	8.98015	799.831	27.4207	926.884	394.745	366.497	430.609	573.745	147.8	0	77.6388
hsa_circ_0019607	chr10:103552595-103570071:-	MGEA5	circBase	1826	9	17476	chr10:103551196-103552595|chr10:103570071-103572786	ENSG00000198408.13_2	ENST00000361464.7_1	NM_012215	Nhek, K562, Hsmm, H1hesc, Gm12878, Bj, Ag04450, Nhlf, Mcf7, diencephalon, Sy5y_exp1_D4, cerebellum, occipital_lobe, frontal_cortex, parietal_lobe, temporal_lobe, WAS2, ada_scid	ANNOTATED, CDS, coding, INTERNAL, OVCODE, OVERLAPTX, OVEXON	Maass2017, Rybak2015, Salzman2013	-2.28315	0.205449	0.00287743	0.0647629	7.68195	9.9651	1407.7	1919.45	231.721	789.49	586.395	191.382	63.7494	221.7	376.946	155.278
hsa_circ_0019611	chr10:103558598-103560157:-	MGEA5	circBase	773	2	1559	chr10:103557911-103558598|chr10:103560157-103563491	ENSG00000198408.13_2	ENST00000361464.7_1	NM_012215	Gm12878, Sknshra, diencephalon, Sy5y_exp1_D4, cerebellum, occipital_lobe, frontal_cortex, parietal_lobe, temporal_lobe, platelets	ANNOTATED, CDS, coding, INTERNAL, OVCODE, OVEXON	Maass2017, Rybak2015, Salzman2013	-2.21184	0.215858	0.10834	0.389274	5.57257	7.78441	351.926	383.89	0	322.973	0	0	0	147.8	75.3892	0
hsa_circ_0004117	chr10:103699619-103717489:-	C10orf76	circBase	286	3	17870	chr10:103649247-103699619|chr10:103717489-103734968	ENSG00000120029.12_2	ENST00000370033.8_1	NM_024541	Hs68_RNase, Hs68_control, diencephalon, cerebellum, occipital_lobe, frontal_cortex, parietal_lobe, temporal_lobe, right_atrium, platelets	ANNOTATED, CDS, coding, INTERNAL, OVCODE, OVEXON	Jeck2013, Maass2017, Rybak2015	-0.650666	0.636986	0.532848	0.781641	7.29818	7.94885	383.919	438.731	0	215.316	146.599	95.691	0	147.8	226.168	310.555
hsa_circ_0019696	chr10:104018685-104019873:+	GBF1	circBase	173	2	1188	chr10:104005538-104018685|chr10:104019873-104103807	ENSG00000107862.4_3	ENST00000369983.3_1	NM_004193	K562, Bj, Ag04450, Sknshra, cerebellum, occipital_lobe, frontal_cortex, parietal_lobe	ANNOTATED, CDS, coding, INTERNAL, OVCODE, OVEXON, UTR5	Rybak2015, Salzman2013	2.38597	5.22695	0.10105	0.37541	7.40533	5.01936	127.973	0	0	0	0	95.691	127.499	295.599	0	310.555
hsa_circ_0000258	chr10:105197771-105198565:+	PDCD11	circBase	180	2	794	chr10:105194732-105197771|chr10:105198565-105199502	ENSG00000148843.13_2	ENST00000369797.7_1	NM_014976	cd_19, cd_34, Hs68_RNase, Hs68_control, diencephalon, cerebellum, Sy5y_exp1_D0, occipital_lobe, frontal_cortex, Sy5y_exp1_D2, parietal_lobe, temporal_lobe, platelets	ANNOTATED, CDS, coding, INTERNAL, OVCODE, OVEXON	Jeck2013, Maass2017, Memczak2013, Rybak2015	1.18297	2.27043	0.105152	0.385109	9.38797	8.205	351.926	493.573	185.377	179.43	219.898	191.382	1274.99	1108.5	603.114	155.278
hsa_circ_0092529	chr10:105330628-105344982:+	NEURL	circBase	1254	3	14354	chr10:105254229-105330628|chr10:105344982-105349270	ENSG00000107954.10_3	ENST00000369780.8_1	NM_004210	diencephalon, cerebellum, occipital_lobe, frontal_cortex, parietal_lobe	ANNOTATED, CDS, coding, INTERNAL, OVCODE, OVERLAPTX, OVEXON	Rybak2015	-1.43734	0.369248	0.274288	0.591737	7.2574	8.69473	95.9797	27.4207	0	1004.81	916.242	621.991	0	0	75.3892	0
hsa_circ_0000259	chr10:105767934-105778666:+	SLK	circBase	435	3	10732	chr10:105765793-105767934|chr10:105778666-105779491	ENSG00000065613.13_3	ENST00000335753.8_3	NM_014720	cd_19, neutr, Nhek, Sknshra, diencephalon, cerebellum, occipital_lobe, frontal_cortex, parietal_lobe, SY5Y_exp2_D8, temporal_lobe, adipose, neutophils, platelets	ANNOTATED, CDS, coding, INTERNAL	Maass2017, Memczak2013, Rybak2015, Salzman2013	1.84115	3.58295	0.148705	0.445942	7.31441	5.47326	127.973	54.8414	0	0	0	0	254.998	295.599	75.3892	155.278
hsa_circ_0003357	chr10:111883774-111890244:+	ADD3	circBase	589	4	6470	chr10:111882050-111883774|chr10:111890244-111893083	ENSG00000148700.14_3	ENST00000360162.7_1	NM_016824	Hs68_RNase, Hs68_control, K562, Gm12878, Ag04450, Sknshra, diencephalon, Sy5y_exp1_D4, cerebellum, Sy5y_exp1_D0, occipital_lobe, frontal_cortex, parietal_lobe, SY5Y_exp2_D8, temporal_lobe, SY5Y_exp2_D4, neutophils, platelets	ANNOTATED, CDS, coding, INTERNAL, OVCODE, OVEXON	Jeck2013, Maass2017, Rybak2015, Salzman2013	-0.655388	0.634905	0.509769	0.770055	7.0674	7.72279	255.946	109.683	231.721	179.43	256.548	95.691	382.497	0	150.778	0
hsa_circ_0092631	chr10:111883774-111892158:+	ADD3	circBase	685	5	8384	chr10:111882050-111883774|chr10:111892158-111893083	ENSG00000148700.14_3	ENST00000356080.8_1	NM_016824	diencephalon, cerebellum, occipital_lobe, frontal_cortex, parietal_lobe, temporal_lobe, SY5Y_exp2_D4	ANNOTATED, CDS, coding, INTERNAL, OVCODE, OVEXON	Rybak2015	-3.54424	0.0857189	0.00254772	0.0620586	4.8817	8.42594	671.858	767.78	46.3442	35.8859	146.599	95.691	0	0	0	0
hsa_circ_0000260	chr10:112356155-112358048:+	SMC3	circBase	305	2	1893	chr10:112352981-112356155|chr10:112358048-112359411	ENSG00000108055.9_2	ENST00000361804.4_1	NM_005445	HEK293, cd_19, Hs68_RNase, Hs68_control, SY5Y_exp2_D0, diencephalon, Sy5y_exp1_D4, cerebellum, Sy5y_exp1_D0, occipital_lobe, frontal_cortex, Sy5y_exp1_D2, parietal_lobe, SY5Y_exp2_D8, temporal_lobe, SY5Y_exp2_D4, WAS2, MSC_047, platelets	ANNOTATED, CDS, coding, INTERNAL, OVCODE, OVEXON	Jeck2013, Maass2017, Memczak2013, Rybak2015	-1.19615	0.436437	0.0812403	0.350773	9.27919	10.4753	2847.4	2083.97	463.442	1004.81	659.694	334.918	956.241	960.698	678.503	155.278
hsa_circ_0004277	chr10:1125950-1126416:+	WDR37	circBase	161	2	466	chr10:1123943-1125950|chr10:1126416-1130342	ENSG00000047056.14_2	ENST00000358220.5_1	NM_014023	Hs68_RNase, Hs68_control, Nhek, K562, Huvec, Hepg2, Helas3, H1hesc, Gm12878, Bj, Ag04450, A549, Sknshra, Mcf7, diencephalon, cerebellum, Sy5y_exp1_D0, occipital_lobe, frontal_cortex, Sy5y_exp1_D2, parietal_lobe, SY5Y_exp2_D4, chondrocytes, ada_scid, platelets	ANNOTATED, CDS, coding, INTERNAL, OVCODE, OVEXON	Jeck2013, Maass2017, Rybak2015, Salzman2013	-1.24004	0.42336	0.305627	0.612997	7.04747	8.28752	767.838	301.628	463.442	0	0	0	127.499	443.399	0	77.6388
hsa_circ_0092663	chr10:112640990-112650428:+	PDCD4	circBase	947	6	9438	chr10:112636511-112640990|chr10:112650428-112653848	ENSG00000150593.17_3	ENST00000393104.6_1	NM_145341	diencephalon, cerebellum, occipital_lobe, frontal_cortex, parietal_lobe	ANNOTATED, CDS, coding, INTERNAL, OVCODE, OVEXON	Rybak2015	-1.42652	0.372027	0.11285	0.398604	6.56572	7.99224	447.905	219.366	92.6884	107.658	366.497	143.536	63.7494	73.8999	150.778	0
hsa_circ_0020028	chr10:112723882-112745523:+	SHOC2	circBase	1075	2	21641	chr10:112679415-112723882|chr10:112745523-112760172	ENSG00000108061.11_2	ENST00000369452.8_1	NM_007373	Nhek, K562, Huvec, Hsmm, Hepg2, Helas3, H1hesc, Gm12878, Bj, Ag04450, A549, Sknshra, Mcf7, SY5Y_exp2_D0, diencephalon, Sy5y_exp1_D4, cerebellum, Sy5y_exp1_D0, occipital_lobe, frontal_cortex, Sy5y_exp1_D2, parietal_lobe, SY5Y_exp2_D8, temporal_lobe, WAS2, cortex, vena_cava, platelets	ANNOTATED, CDS, coding, INTERNAL, OVCODE, OVERLAPTX, OVEXON, UTR5	Maass2017, Rybak2015, Salzman2013	-0.349119	0.785063	0.604507	0.83156	9.14181	9.49093	831.824	1014.57	324.409	753.605	623.045	574.146	191.248	738.999	452.335	854.026
hsa_circ_0002533	chr10:114286845-114298089:+	VTI1A	circBase	163	2	11244	chr10:114224416-114286845|chr10:114298089-114427976	ENSG00000151532.13_2	ENST00000432306.5_1	NM_145206	Hs68_RNase, Hs68_control, K562, Ag04450, A549, SY5Y_exp2_D0, diencephalon, cerebellum, occipital_lobe, frontal_cortex, Sy5y_exp1_D2, parietal_lobe, temporal_lobe, platelets	ANNOTATED, CDS, coding, INTERNAL, OVCODE, OVEXON	Jeck2013, Maass2017, Rybak2015, Salzman2013	0.231148	1.17377	0.848637	0.962468	7.38582	7.15467	63.9865	0	278.065	215.316	146.599	143.536	63.7494	0	301.557	310.555
hsa_circ_0020072	chr10:116247716-116251637:-	ABLIM1	circBase	147	2	3921	chr10:116245139-116247716|chr10:116251637-116286418	ENSG00000099204.18_3	ENST00000392952.7_1	NM_001003408	Hepg2, Helas3, A549, diencephalon, cerebellum, occipital_lobe, frontal_cortex, Sy5y_exp1_D2, parietal_lobe	ANNOTATED, CDS, coding, INTERNAL, OVCODE, OVEXON	Rybak2015, Salzman2013	-1.97546	0.254289	0.0971733	0.371706	6.06006	8.03552	383.919	767.78	0	0	109.949	95.691	191.248	0	0	0
hsa_circ_0020080	chr10:116590610-116608496:+	FAM160B1	circBase	1758	12	17886	chr10:116581882-116590610|chr10:116608496-116614955	ENSG00000151553.14_2	ENST00000369248.8_1	NM_020940	K562, Hepg2, Gm12878, Ag04450, A549, diencephalon, Sy5y_exp1_D4, cerebellum, Sy5y_exp1_D0, occipital_lobe, frontal_cortex, parietal_lobe, temporal_lobe	ANNOTATED, CDS, coding, INTERNAL, OVCODE, OVEXON	Rybak2015, Salzman2013	1.9245	3.79604	0.121896	0.410969	7.49656	5.57206	0	54.8414	46.3442	0	109.949	95.691	318.747	0	0	465.833
hsa_circ_0020092	chr10:116730126-116734144:+	TRUB1	circBase	270	3	4018	chr10:116719566-116730126|chr10:116734144-116734881	ENSG00000165832.5_2	ENST00000298746.4_1	NM_139169	Gm12878, Ag04450, diencephalon, Sy5y_exp1_D4, cerebellum, occipital_lobe, frontal_cortex, parietal_lobe, temporal_lobe	ANNOTATED, CDS, coding, INTERNAL, OVCODE, OVEXON	Rybak2015, Salzman2013	0.0725009	1.05154	1	1	7.56894	7.49644	319.932	274.207	46.3442	71.7719	146.599	47.8455	0	295.599	527.725	77.6388
hsa_circ_0020093	chr10:116879948-116889297:+	ATRNL1	circBase	638	5	9349	chr10:116856596-116879948|chr10:116889297-116919800	ENSG00000107518.16_3	ENST00000616894.1_1	NM_207303	H1hesc, A549, Sknshra, Mcf7, SY5Y_exp2_D0, diencephalon, Sy5y_exp1_D4, cerebellum, Sy5y_exp1_D0, occipital_lobe, frontal_cortex, Sy5y_exp1_D2, parietal_lobe, SY5Y_exp2_D8, temporal_lobe, SY5Y_exp2_D4, cortex	ANNOTATED, CDS, coding, INTERNAL, OVCODE, OVEXON	Maass2017, Rybak2015, Salzman2013	0.0668259	1.04741	0.94012	1	11.8946	11.8277	639.865	82.2622	3522.16	7356.62	6560.29	5502.23	1657.49	5246.89	5428.03	1164.58
hsa_circ_0020094	chr10:116879948-116925405:+	ATRNL1	circBase	901	7	45457	chr10:116856596-116879948|chr10:116925405-116930794	ENSG00000107518.16_3	ENST00000616894.1_1	NM_207303	H1hesc, Sknshra, diencephalon, Sy5y_exp1_D4, cerebellum, Sy5y_exp1_D0, occipital_lobe, frontal_cortex, Sy5y_exp1_D2, parietal_lobe, temporal_lobe, cortex	ANNOTATED, CDS, coding, INTERNAL, OVCODE, OVEXON	Maass2017, Rybak2015, Salzman2013	-1.17717	0.442218	0.147717	0.444012	8.36768	9.54485	95.9797	137.104	509.786	1435.44	1539.29	669.837	318.747	295.599	301.557	0
hsa_circ_0092763	chr10:116879948-116931050:+	ATRNL1	circBase	1055	7	51102	chr10:116853802-116879948|chr10:116931050-116975454	ENSG00000107518.16_3	ENST00000355044.7_1	NM_207303	SY5Y_exp2_D0, diencephalon, Sy5y_exp1_D4, cerebellum, Sy5y_exp1_D0, occipital_lobe, frontal_cortex, Sy5y_exp1_D2, parietal_lobe, temporal_lobe, SY5Y_exp2_D4	ANNOTATED, CDS, coding, INTERNAL, OVCODE, OVEXON	Rybak2015	-0.864391	0.549278	0.430321	0.715446	9.94158	10.806	95.9797	27.4207	1019.57	4378.08	3408.42	2200.89	127.499	1478	829.282	232.916
hsa_circ_0092765	chr10:116879948-116975638:+	ATRNL1	circBase	1239	8	95690	chr10:116853802-116879948|chr10:116975638-117001359	ENSG00000107518.16_3	ENST00000355044.7_1	NM_207303	diencephalon, cerebellum, occipital_lobe, frontal_cortex, Sy5y_exp1_D2, parietal_lobe, temporal_lobe	ANNOTATED, CDS, coding, INTERNAL, OVCODE, OVEXON	Rybak2015	-1.18538	0.439709	0.376968	0.676864	9.26262	10.448	287.939	0	370.753	3624.48	2675.43	2583.66	191.248	73.8999	75.3892	77.6388
chr10:116879948-117001514:+	chr10:116879948-117001514:+	ATRNL1	CIRCexplorer2	1394	9	121566	chr10:116853802-116879948|chr10:117001514-117024669	ENSG00000107518.16_3	ENST00000355044.7_1	NA	NA	NA	NA	-1.69711	0.308403	0.436227	0.719598	8.59329	10.2904	0	54.8414	0	2404.36	3774.92	1818.13	63.7494	0	0	0
chr10:116879948-117027921:+	chr10:116879948-117027921:+	ATRNL1	CIRCexplorer2	1807	12	147973	chr10:116853802-116879948|chr10:117027921-117040864	ENSG00000107518.16_3	ENST00000355044.7_1	NA	NA	NA	NA	-1.39896	0.379203	0.219973	0.545347	7.42823	8.82719	159.966	0	92.6884	1076.58	916.242	574.146	0	221.7	0	0
chr10:116879948-117075246:+	chr10:116879948-117075246:+	ATRNL1	CIRCexplorer2	2744	17	195298	chr10:116853802-116879948|chr10:117075246-117093791	ENSG00000107518.16_3	ENST00000355044.7_1	NA	NA	NA	NA	-1.49974	0.353617	0.207031	0.530839	8.64749	10.1472	351.926	0	139.033	2404.36	2748.73	1148.29	127.499	369.499	301.557	0
chr10:116879948-117093929:+	chr10:116879948-117093929:+	ATRNL1	CIRCexplorer2	2882	18	213981	chr10:116853802-116879948|chr10:117093929-117154168	ENSG00000107518.16_3	ENST00000355044.7_1	NA	NA	NA	NA	-1.22845	0.426775	0.317761	0.622975	7.60066	8.82911	31.9932	0	0	933.034	1282.74	621.991	63.7494	147.8	0	77.6388
chr10:116879948-117154262:+	chr10:116879948-117154262:+	ATRNL1	CIRCexplorer2	2976	19	274314	chr10:116853802-116879948|chr10:117154262-117185759	ENSG00000107518.16_3	ENST00000355044.7_1	NA	NA	NA	NA	-0.902428	0.534986	0.488168	0.755888	6.94139	7.84381	31.9932	0	46.3442	861.262	183.248	478.455	63.7494	0	0	0
chr10:116879948-117185812:+	chr10:116879948-117185812:+	ATRNL1	CIRCexplorer2	3029	20	305864	chr10:116853802-116879948|chr10:117185812-117221450	ENSG00000107518.16_3	ENST00000355044.7_1	NA	NA	NA	NA	-2.58982	0.166107	0.0112375	0.136864	7.71235	10.3022	287.939	82.2622	231.721	3193.85	2492.18	621.991	127.499	0	150.778	77.6388
chr10:116879948-117228839:+	chr10:116879948-117228839:+	ATRNL1	CIRCexplorer2	3361	23	348891	chr10:116853802-116879948|chr10:117228839-117278772	ENSG00000107518.16_3	ENST00000355044.7_1	NA	NA	NA	NA	-0.574374	0.671578	0.650491	0.855613	7.9129	8.48727	63.9865	0	0	897.148	806.293	861.219	127.499	0	150.778	0
chr10:116879948-117309046:+	chr10:116879948-117309046:+	ATRNL1	CIRCexplorer2	3502	25	429098	chr10:116853802-116879948|chr10:117309046-117486757	ENSG00000107518.16_3	ENST00000355044.7_1	NA	NA	NA	NA	-1.20642	0.433343	0.505661	0.768755	7.94924	9.15566	0	0	0	1614.87	1209.44	956.91	0	73.8999	0	155.278
chr10:116879948-117486865:+	chr10:116879948-117486865:+	ATRNL1	CIRCexplorer2	3610	26	606917	chr10:116853802-116879948|chr10:117486865-117607387	ENSG00000107518.16_3	ENST00000355044.7_1	NA	NA	NA	NA	-1.40208	0.378383	0.316761	0.621669	6.88601	8.28809	0	0	92.6884	1004.81	439.796	526.3	0	0	0	0
hsa_circ_0020095	chr10:116975454-117075246:+	ATRNL1	circBase	1689	10	99792	chr10:116931050-116975454|chr10:117075246-117093791	ENSG00000107518.16_3	ENST00000355044.7_1	NM_207303	H1hesc, Sknshra, diencephalon, cerebellum, occipital_lobe, frontal_cortex, parietal_lobe, temporal_lobe	ANNOTATED, CDS, coding, INTERNAL, OVCODE, OVEXON	Rybak2015, Salzman2013	0.0707159	1.05024	1	1	7.90707	7.83635	63.9865	0	0	502.403	549.745	621.991	0	73.8999	452.335	0
chr10:116975454-117093929:+	chr10:116975454-117093929:+	ATRNL1	CIRCexplorer2	1827	11	118475	chr10:116931050-116975454|chr10:117093929-117154168	ENSG00000107518.16_3	ENST00000355044.7_1	NA	NA	NA	NA	1.35197	2.55261	0.29985	0.608439	8.14728	6.7953	0	54.8414	0	215.316	256.548	478.455	0	0	904.671	0
chr10:116975454-117185812:+	chr10:116975454-117185812:+	ATRNL1	CIRCexplorer2	1974	13	210358	chr10:116931050-116975454|chr10:117185812-117221450	ENSG00000107518.16_3	ENST00000355044.7_1	NA	NA	NA	NA	-1.15723	0.448371	0.331173	0.632261	6.61508	7.77232	0	0	92.6884	574.175	403.147	287.073	0	147.8	0	0
hsa_circ_0092794	chr10:117185759-117228839:+	ATRNL1	circBase	385	4	43080	chr10:117154262-117185759|chr10:117228839-117278772	ENSG00000107518.16_3	ENST00000355044.7_1	NM_207303	diencephalon, cerebellum, occipital_lobe, frontal_cortex, parietal_lobe, temporal_lobe	ANNOTATED, CDS, coding, INTERNAL, OVCODE, OVERLAPTX, OVEXON	Rybak2015	-2.05448	0.240735	0.0664761	0.316563	6.41513	8.46961	127.973	0	92.6884	538.289	989.542	287.073	0	0	75.3892	0
chr10:117185759-117309046:+	chr10:117185759-117309046:+	ATRNL1	CIRCexplorer2	526	6	123287	chr10:117154262-117185759|chr10:117309046-117486757	ENSG00000107518.16_3	ENST00000355044.7_1	NA	NA	NA	NA	-1.59963	0.329961	0.181814	0.499409	6.33507	7.9347	0	0	185.377	430.631	586.395	334.918	0	0	0	0
hsa_circ_0092796	chr10:117221450-117228839:+	ATRNL1	circBase	332	3	7389	chr10:117185812-117221450|chr10:117228839-117278772	ENSG00000107518.16_3	ENST00000355044.7_1	NM_207303	SY5Y_exp2_D0, diencephalon, Sy5y_exp1_D4, cerebellum, Sy5y_exp1_D0, occipital_lobe, frontal_cortex, Sy5y_exp1_D2, parietal_lobe, SY5Y_exp2_D8, temporal_lobe, SY5Y_exp2_D4	ANNOTATED, CDS, coding, INTERNAL, OVCODE, OVERLAPTX, OVEXON	Rybak2015	0.658862	1.57884	0.432248	0.717726	9.99547	9.33661	127.973	164.524	46.3442	1327.78	1539.29	1531.06	764.993	1625.8	980.06	155.278
hsa_circ_0020097	chr10:117221450-117278834:+	ATRNL1	circBase	394	4	57384	chr10:117185812-117221450|chr10:117278834-117308967	ENSG00000107518.16_3	ENST00000355044.7_1	NM_207303	Sknshra, diencephalon, cerebellum, Sy5y_exp1_D0, occipital_lobe, frontal_cortex, Sy5y_exp1_D2, parietal_lobe, temporal_lobe	ANNOTATED, CDS, coding, INTERNAL, OVCODE, OVERLAPTX, OVEXON	Rybak2015, Salzman2013	-0.577955	0.669913	0.533689	0.781641	8.06988	8.64784	63.9865	54.8414	231.721	645.947	989.542	621.991	63.7494	295.599	301.557	0
hsa_circ_0092798	chr10:117221450-117309046:+	ATRNL1	circBase	473	5	87596	chr10:117185812-117221450|chr10:117309046-117486757	ENSG00000107518.16_3	ENST00000355044.7_1	NM_207303	diencephalon, cerebellum, occipital_lobe, frontal_cortex, parietal_lobe, SY5Y_exp2_D8, temporal_lobe	ANNOTATED, CDS, coding, INTERNAL, OVCODE, OVERLAPTX, OVEXON	Rybak2015	-0.581199	0.668408	0.616533	0.838688	8.96827	9.54947	0	137.104	1019.57	1399.55	1172.79	1865.97	191.248	295.599	75.3892	0
hsa_circ_0000213	chr10:12039670-12056183:-	UPF2	circBase	699	5	16513	chr10:12021164-12039670|chr10:12056183-12070743	ENSG00000151461.19_3	ENST00000356352.6_1	NM_015542	cd_19, Hs68_RNase, Hs68_control, Nhek, K562, Helas3, H1hesc, Gm12878, Bj, Ag04450, A549, Sknshra, diencephalon, cerebellum, Sy5y_exp1_D0, occipital_lobe, frontal_cortex, Sy5y_exp1_D2, parietal_lobe, temporal_lobe, LCL, platelets	ANNOTATED, CDS, coding, INTERNAL, OVCODE, OVEXON	Jeck2013, Maass2017, Memczak2013, Rybak2015, Salzman2013	0.696283	1.62032	0.533134	0.781641	7.67049	6.97421	191.959	109.683	0	179.43	109.949	239.227	573.745	0	0	155.278
hsa_circ_0008896	chr10:122273422-122280607:+	PPAPDC1A	circBase	280	3	7185	chr10:122263438-122273422|chr10:122280607-122334642	ENSG00000203805.10_2	ENST00000398250.5_2	NM_001030059	Hs68_RNase, Hs68_control, Huvec, Bj, Sknshra, diencephalon, cerebellum, occipital_lobe, frontal_cortex, parietal_lobe, temporal_lobe	ANNOTATED, CDS, coding, INTERNAL, OVCODE, OVEXON	Jeck2013, Rybak2015, Salzman2013	1.47836	2.78632	0.0965293	0.370727	8.90825	7.42989	95.9797	219.366	231.721	179.43	109.949	0	63.7494	665.099	452.335	1242.22
hsa_circ_0092984	chr10:123298105-123325218:-	FGFR2	circBase	639	4	27113	chr10:123274833-123298105|chr10:123325218-123353222	ENSG00000066468.22_3	ENST00000369061.8_1	NM_022970	diencephalon, cerebellum, occipital_lobe, frontal_cortex, parietal_lobe, temporal_lobe	ANNOTATED, CDS, coding, INTERNAL, OVCODE, OVERLAPTX, OVEXON	Rybak2015	0.580552	1.49542	0.588486	0.819122	8.22382	7.64326	479.898	137.104	92.6884	143.544	109.949	95.691	828.743	0	0	543.471
hsa_circ_0007062	chr10:123549683-123683844:-	ATE1	circBase	1272	10	134161	chr10:123503373-123549683|chr10:123683844-123687358	ENSG00000107669.17_4	ENST00000224652.10_4	NM_007041	Hs68_RNase, Hs68_control, Nhek, Hsmm, Helas3, Ag04450, A549	ANNOTATED, CDS, coding, INTERNAL, OVCODE, OVEXON	Jeck2013, Salzman2013	-1.30264	0.405384	0.133135	0.429099	7.4556	8.75824	31.9932	137.104	231.721	753.605	989.542	334.918	254.998	0	150.778	77.6388
hsa_circ_0000264	chr10:125798030-125806240:-	CHST15	circBase	1702	4	8210	chr10:125780928-125798030|chr10:125806240-125852984	ENSG00000182022.17_3	ENST00000435907.5_1	NM_015892	cd_19, Hs68_RNase, Hs68_control, Nhek, Hsmm, Hepg2, Helas3, H1hesc, Bj, Ag04450, A549, Mcf7, diencephalon, cerebellum, occipital_lobe, frontal_cortex, parietal_lobe, temporal_lobe	ANNOTATED, CDS, coding, INTERNAL, OVCODE, OVEXON, UTR5	Jeck2013, Memczak2013, Rybak2015, Salzman2013	-1.36188	0.389075	0.301075	0.609141	6.07022	7.4321	0	0	0	251.202	586.395	143.536	0	0	0	155.278
hsa_circ_0000267	chr10:126370175-126370948:-	FAM53B	circBase	773	1	773	chr10:126307362-126370175|chr10:126370948-126384726	ENSG00000258539.1_4	ENST00000494792.1_1	NM_014661	cd_19, Hs68_RNase, Hs68_control, Nhek, K562, Huvec, Hsmm, Hmec, Hepg2, Helas3, H1hesc, Gm12878, Bj, Ag04450, A549, Sknshra, Mcf7, diencephalon, Sy5y_exp1_D4, cerebellum, Sy5y_exp1_D0, occipital_lobe, frontal_cortex, Sy5y_exp1_D2, parietal_lobe, temporal_lobe, SY5Y_exp2_D4, WAS2, ada_scid, adipose, platelets	ANNOTATED, CDS, coding, INTERNAL, OVCODE, OVEXON	Jeck2013, Maass2017, Memczak2013, Rybak2015, Salzman2013	-0.540099	0.687724	0.482881	0.752898	8.17372	8.71382	287.939	383.89	463.442	574.175	366.497	765.528	63.7494	73.8999	301.557	155.278
chr10:128192525-128202508:-	chr10:128192525-128202508:-	C10orf90	CIRCexplorer2	1221	2	9983	chr10:128153555-128192525|chr10:128202508-128209867	ENSG00000154493.17_4	ENST00000284694.11_1	NA	NA	NA	NA	-0.346391	0.786549	0.708732	0.892222	8.12177	8.46816	63.9865	0	1204.95	143.544	366.497	526.3	0	443.399	301.557	77.6388
hsa_circ_0007142	chr10:128768965-128788867:+	DOCK1	circBase	427	5	19902	chr10:128594132-128768965|chr10:128788867-128795011	ENSG00000150760.12_2	ENST00000280333.9_1	NM_001380	Hs68_RNase, Hs68_control, Nhek, Huvec, Hepg2, Helas3, H1hesc, Ag04450, Sknshra, SY5Y_exp2_D0, diencephalon, cerebellum, occipital_lobe, frontal_cortex, Sy5y_exp1_D2, parietal_lobe, temporal_lobe, right_atrium, muscle, platelets	ANNOTATED, CDS, coding, INTERNAL, OVCODE, OVEXON	Jeck2013, Maass2017, Rybak2015, Salzman2013	0.206971	1.15426	0.88218	0.979694	7.61963	7.41266	127.973	27.4207	278.065	0	403.147	0	63.7494	73.8999	150.778	698.749
hsa_circ_0002669	chr10:128768965-128798571:+	DOCK1	circBase	939	9	29606	chr10:128594132-128768965|chr10:128798571-128806995	ENSG00000150760.12_2	ENST00000280333.9_1	NM_001380	Hs68_RNase, Hs68_control, Nhek, Huvec, Hepg2, Helas3, H1hesc, Bj, Ag04450, A549, Sknshra, Mcf7, diencephalon, cerebellum, Sy5y_exp1_D0, occipital_lobe, frontal_cortex, Sy5y_exp1_D2, parietal_lobe, temporal_lobe, SY5Y_exp2_D4, vena_cava, right_atrium, MSC_047, HUAEC	ANNOTATED, CDS, coding, INTERNAL, OVCODE, OVEXON	Jeck2013, Maass2017, Rybak2015, Salzman2013	-0.0828516	0.94419	0.931944	0.998823	10.0281	10.111	511.892	54.8414	3939.26	610.061	439.796	813.373	892.492	738.999	1130.84	1630.41
hsa_circ_0006780	chr10:14938844-14939516:+	SUV39H2	circBase	672	1	672	chr10:14920918-14938844|chr10:14939516-14941537	ENSG00000152455.15_3	ENST00000378331.5_1	NM_001193424	Hs68_RNase, Hs68_control, K562, Gm12878, diencephalon, cerebellum, Sy5y_exp1_D0, occipital_lobe, frontal_cortex, parietal_lobe, temporal_lobe, platelets	ANNOTATED, CDS, coding, INTERNAL, OVCODE, OVEXON	Jeck2013, Maass2017, Rybak2015, Salzman2013	-1.72654	0.302175	0.083755	0.356189	6.37303	8.09957	287.939	383.89	46.3442	466.517	146.599	334.918	0	0	0	0
hsa_circ_0017848	chr10:15838098-15889942:-	FAM188A	circBase	809	9	51844	chr10:15831318-15838098|chr10:15889942-15902204	ENSG00000148481.13_2	ENST00000477891.1_1	NM_024948	K562, H1hesc, diencephalon, cerebellum, occipital_lobe, frontal_cortex, parietal_lobe, temporal_lobe	ANNOTATED, CDS, coding, INTERNAL, OVCODE, OVERLAPTX, OVEXON	Rybak2015, Salzman2013	-3.05822	0.120056	0.00849196	0.115401	5.04218	8.1004	159.966	54.8414	231.721	502.403	403.147	0	0	147.8	0	0
hsa_circ_0000219	chr10:15858833-15889942:-	FAM188A	circBase	736	8	31109	chr10:15838171-15858833|chr10:15889942-15902204	ENSG00000148481.13_2	ENST00000477891.1_1	NM_024948	cd_19, Hs68_RNase, Hs68_control, Nhek, K562, Huvec, Helas3, H1hesc, Gm12878, Bj, Ag04450, A549, Sknshra, SY5Y_exp2_D0, diencephalon, Sy5y_exp1_D4, cerebellum, Sy5y_exp1_D0, occipital_lobe, frontal_cortex, Sy5y_exp1_D2, parietal_lobe, temporal_lobe, SY5Y_exp2_D4, EPC, WAS2, ada_scid, cortex, adipose, vena_cava, right_atrium, muscle, LCL, neutophils, platelets	ANNOTATED, CDS, coding, INTERNAL, OVCODE, OVEXON	Jeck2013, Maass2017, Memczak2013, Rybak2015, Salzman2013	-0.413429	0.750837	0.532466	0.781641	9.48793	9.90136	1375.71	685.518	695.163	1112.46	879.592	1148.29	637.494	221.7	1055.45	465.833
hsa_circ_0000220	chr10:15863654-15889942:-	FAM188A	circBase	655	7	26288	chr10:15858914-15863654|chr10:15889942-15902204	ENSG00000148481.13_2	ENST00000477891.1_1	NM_024948	cd_34, Nhek, Helas3, Gm12878, Bj, Ag04450, A549, Sknshra, diencephalon, cerebellum, occipital_lobe, frontal_cortex, parietal_lobe, temporal_lobe, WAS2, cortex	ANNOTATED, CDS, coding, INTERNAL	Maass2017, Memczak2013, Rybak2015, Salzman2013	-0.962411	0.513198	0.291016	0.602243	7.07612	8.03853	351.926	329.049	46.3442	215.316	329.847	334.918	191.248	0	75.3892	0
hsa_circ_0006665	chr10:15875628-15889942:-	FAM188A	circBase	584	6	14314	chr10:15863725-15875628|chr10:15889942-15902204	ENSG00000148481.13_2	ENST00000477891.1_1	NM_024948	Hs68_RNase, Hs68_control, K562, Huvec, Hepg2, H1hesc, Gm12878, Bj, Ag04450, A549, Sknshra, Mcf7, SY5Y_exp2_D0, diencephalon, Sy5y_exp1_D4, cerebellum, Sy5y_exp1_D0, occipital_lobe, frontal_cortex, Sy5y_exp1_D2, parietal_lobe, temporal_lobe, SY5Y_exp2_D4, WAS2, cortex, right_atrium	ANNOTATED, CDS, coding, INTERNAL, OVCODE, OVEXON	Jeck2013, Maass2017, Rybak2015, Salzman2013	-0.489911	0.712069	0.411536	0.703514	9.5806	10.0705	1183.75	1398.46	787.851	753.605	1209.44	956.91	637.494	812.899	603.114	776.388
hsa_circ_0006577	chr10:16794537-16824083:-	RSU1	circBase	489	5	29546	chr10:16737154-16794537|chr10:16824083-16858971	ENSG00000148484.17_3	ENST00000377921.7_1	NM_012425	Hs68_RNase, Hs68_control, Nhek, K562, Hsmm, Hepg2, Helas3, H1hesc, Gm12878, Bj, Ag04450, A549, Nhlf, Sknshra, Mcf7, diencephalon, cerebellum, occipital_lobe, frontal_cortex, parietal_lobe, temporal_lobe, platelets	ANNOTATED, CDS, coding, INTERNAL, OVCODE, OVEXON	Jeck2013, Maass2017, Rybak2015, Salzman2013	-0.502939	0.705668	0.684104	0.876567	7.28857	7.79151	191.959	82.2622	231.721	251.202	329.847	47.8455	254.998	0	0	465.833
hsa_circ_0093229	chr10:17199439-17210916:-	TRDMT1	circBase	713	6	11477	chr10:17196733-17199439|chr10:17210916-17211308	ENSG00000107614.21_2	ENST00000354631.7_1	NM_004412	diencephalon, cerebellum, occipital_lobe, frontal_cortex, parietal_lobe, temporal_lobe	ANNOTATED, CDS, coding, INTERNAL, OVCODE, OVEXON	Rybak2015	-1.69365	0.309144	0.141933	0.437838	6.01168	7.70533	127.973	329.049	417.098	0	146.599	191.382	0	73.8999	0	0
hsa_circ_0008311	chr10:17746429-17747740:+	STAM	circBase	297	3	1311	chr10:17742278-17746429|chr10:17747740-17750774	ENSG00000136738.14_2	ENST00000377524.7_1	NM_003473	Hs68_RNase, Hs68_control, Nhek, K562, Huvec, Hepg2, Helas3, H1hesc, Gm12878, Bj, Ag04450, A549, Sknshra, diencephalon, Sy5y_exp1_D4, cerebellum, Sy5y_exp1_D0, occipital_lobe, frontal_cortex, parietal_lobe, temporal_lobe, WAS2, ada_scid, decidua, vena_cava, platelets	ANNOTATED, CDS, coding, INTERNAL, OVCODE, OVEXON	Jeck2013, Maass2017, Rybak2015, Salzman2013	0.217222	1.16249	0.782896	0.936718	8.95924	8.74202	479.898	877.463	185.377	107.658	439.796	430.609	956.241	0	753.892	310.555
hsa_circ_0008225	chr10:225933-267296:+	ZMYND11	circBase	457	3	41363	chr10:180726-225933|chr10:267296-282777	ENSG00000015171.19_3	ENST00000397962.8_2	NM_006624	Hs68_RNase, Hs68_control, Nhek, K562, Hsmm, Hepg2, Helas3, Gm12878, Bj, Ag04450, A549, Sknshra, diencephalon, cerebellum, Sy5y_exp1_D0, occipital_lobe, frontal_cortex, parietal_lobe, temporal_lobe	ANNOTATED, CDS, coding, INTERNAL, OVCODE, OVEXON, UTR5	Jeck2013, Rybak2015, Salzman2013	-1.0237	0.491852	0.280114	0.593029	7.09661	8.12032	63.9865	82.2622	324.409	538.289	366.497	287.073	254.998	0	0	77.6388
hsa_circ_0093332	chr10:225933-295028:+	ZMYND11	circBase	1705	13	69095	chr10:180726-225933|chr10:295028-298287	ENSG00000015171.19_3	ENST00000397962.8_2	ENST00000381584.1	diencephalon, cerebellum, occipital_lobe, frontal_cortex, parietal_lobe, temporal_lobe	ANNOTATED, CDS, coding, OVCODE, OVERLAPTX, OVEXON, UTR5	Rybak2015	-2.34667	0.196599	0.00815519	0.114439	7.1703	9.51698	1119.76	1206.51	92.6884	753.605	439.796	382.764	254.998	0	0	0
hsa_circ_0093354	chr10:24908401-24924032:-	ARHGAP21	circBase	2154	5	15631	chr10:24896832-24908401|chr10:24924032-24955913	ENSG00000107863.17_3	ENST00000396432.6_1	NM_020824	diencephalon, cerebellum, occipital_lobe, frontal_cortex, parietal_lobe, temporal_lobe	ANNOTATED, CDS, coding, INTERNAL, OVCODE, OVEXON	Rybak2015	-1.72816	0.301837	0.0317214	0.215538	7.09129	8.81944	511.892	246.786	648.819	358.859	476.446	334.918	191.248	0	0	77.6388
hsa_circ_0093355	chr10:24918924-24924032:-	ARHGAP21	circBase	227	3	5108	chr10:24911691-24918924|chr10:24924032-24955913	ENSG00000107863.17_3	ENST00000396432.6_1	NM_020824	diencephalon, cerebellum, occipital_lobe, frontal_cortex, parietal_lobe, temporal_lobe	ANNOTATED, CDS, coding, INTERNAL, OVCODE, OVEXON	Rybak2015	-1.59107	0.331924	0.121922	0.410969	6.62148	8.21255	95.9797	82.2622	231.721	430.631	623.045	95.691	0	295.599	0	77.6388
hsa_circ_0093401	chr10:27047990-27059274:-	ABI1	circBase	517	4	11284	chr10:27040712-27047990|chr10:27059274-27060003	ENSG00000136754.17_4	ENST00000376170.8_2	ENST00000355394.4	diencephalon, cerebellum, occipital_lobe, frontal_cortex, parietal_lobe	ANNOTATED, CDS, coding, INTERNAL, OVCODE, OVEXON	Rybak2015	1.62497	3.08436	0.0288125	0.203819	9.29874	7.67376	127.973	82.2622	370.753	287.087	146.599	191.382	1211.24	665.099	678.503	388.194
hsa_circ_0093402	chr10:27052808-27059274:-	ABI1	circBase	424	4	6466	chr10:27048167-27052808|chr10:27059274-27060003	ENSG00000136754.17_4	ENST00000376142.6_2	ENST00000355394.4	diencephalon, cerebellum, occipital_lobe, frontal_cortex	ANNOTATED, CDS, coding, INTERNAL, OVCODE, OVEXON	Rybak2015	2.49684	5.64449	0.0195889	0.172324	8.29093	5.79408	0	54.8414	92.6884	71.7719	36.6497	478.455	127.499	0	150.778	776.388
chr10:27054146-27060018:-	chr10:27054146-27060018:-	ABI1	CIRCexplorer2	358	4	5872	chr10:27048164-27054146|chr10:27060018-27065993	ENSG00000136754.17_4	ENST00000376170.8_2	NA	NA	NA	NA	0.538984	1.45295	0.641043	0.850009	7.68417	7.14518	95.9797	54.8414	139.033	322.973	73.2994	143.536	254.998	0	452.335	155.278
hsa_circ_0005633	chr10:27431315-27434519:-	YME1L1	circBase	262	2	3204	chr10:27425314-27431315|chr10:27434519-27436426	ENSG00000136758.18_3	ENST00000326799.7_1	NM_139312	Hs68_RNase, Hs68_control, Nhek, K562, Huvec, Hepg2, Helas3, H1hesc, Gm12878, Bj, Ag04450, A549, Sknshra, diencephalon, cerebellum, occipital_lobe, frontal_cortex, parietal_lobe, temporal_lobe, cortex, platelets	ANNOTATED, CDS, coding, INTERNAL, OVCODE, OVEXON	Jeck2013, Maass2017, Rybak2015, Salzman2013	-2.23048	0.213087	0.0210079	0.178429	6.75586	8.98634	1151.76	850.042	46.3442	287.087	146.599	143.536	127.499	0	0	232.916
hsa_circ_0000226	chr10:27821435-27822923:+	RAB18	circBase	259	3	1488	chr10:27798849-27821435|chr10:27822923-27826804	ENSG00000099246.16_2	ENST00000611151.4_1	NM_021252	cd_19, Hs68_RNase, Hs68_control, K562, diencephalon, cerebellum, occipital_lobe, frontal_cortex, parietal_lobe, temporal_lobe, vena_cava, neutophils, platelets	ANNOTATED, CDS, coding, INTERNAL, OVCODE, OVEXON	Jeck2013, Maass2017, Memczak2013, Rybak2015, Salzman2013	0.262125	1.19924	0.811711	0.950063	7.02284	6.76072	223.953	164.524	0	35.8859	73.2994	239.227	63.7494	147.8	0	155.278
hsa_circ_0007503	chr10:28872327-28884970:+	WAC	circBase	645	4	12643	chr10:28824686-28872327|chr10:28884970-28897114	ENSG00000095787.21_3	ENST00000375664.8_2	NR_024557	Hs68_RNase, Hs68_control, Nhek, K562, Huvec, Hepg2, Helas3, H1hesc, Gm12878, Bj, Ag04450, A549, diencephalon, cerebellum, occipital_lobe, parietal_lobe, platelets	ANNOTATED, INTERNAL, ncRNA, OVCODE, OVEXON	Jeck2013, Maass2017, Rybak2015, Salzman2013	-1.88889	0.270014	0.0162626	0.159053	7.90663	9.79552	2143.55	1425.88	231.721	215.316	366.497	239.227	318.747	147.8	150.778	310.555
hsa_circ_0000230	chr10:31661946-31750166:+	ZEB1	circBase	662	4	88220	chr10:31608062-31661946|chr10:31750166-31784704	ENSG00000148516.21_3	ENST00000488625.6_1	NM_030751	cd_19, Hs68_RNase, Hs68_control, K562, Gm12878, Ag04450, Sknshra, diencephalon, cerebellum, Sy5y_exp1_D0, occipital_lobe, frontal_cortex, Sy5y_exp1_D2, parietal_lobe, temporal_lobe, ada_scid, decidua, LCL, HUAEC	ALT_ACCEPTOR, CDS, coding, INTERNAL, intronic, OVCODE, OVEXON	Jeck2013, Maass2017, Memczak2013, Rybak2015, Salzman2013	3.58161	11.9721	0.00371242	0.0792187	8.33756	4.75595	0	0	0	35.8859	73.2994	47.8455	637.494	295.599	0	621.11
hsa_circ_0002140	chr10:31749965-31750166:+	ZEB1	circBase	201	1	201	chr10:31676195-31749965|chr10:31750166-31784704	ENSG00000148516.21_3	ENST00000488625.6_1	NM_001128128	Hs68_RNase, Hs68_control, Ag04450, diencephalon, cerebellum, occipital_lobe, frontal_cortex, parietal_lobe	ANNOTATED, CDS, coding, INTERNAL, OVCODE, OVEXON	Jeck2013, Rybak2015, Salzman2013	3.82134	14.1364	0.0054459	0.0968164	8.21758	4.39624	0	0	92.6884	0	0	0	191.248	147.8	452.335	698.749
hsa_circ_0000231	chr10:32197099-32199491:-	ARHGAP12	circBase	794	2	2392	chr10:32150586-32197099|chr10:32199491-32217610	ENSG00000165322.17_2	ENST00000375245.8_1	NM_018287	HEK293, neutr, Hs68_RNase, Hs68_control, Nhek, K562, Huvec, Hsmm, Hmec, Hepg2, Helas3, H1hesc, Gm12878, Bj, Ag04450, A549, Nhlf, Sknshra, Mcf7, SY5Y_exp2_D0, diencephalon, Sy5y_exp1_D4, cerebellum, Sy5y_exp1_D0, occipital_lobe, frontal_cortex, Sy5y_exp1_D2, parietal_lobe, temporal_lobe, SY5Y_exp2_D4, vena_cava, MSC	ANNOTATED, CDS, coding, INTERNAL, OVCODE, OVEXON, UTR5	Jeck2013, Maass2017, Memczak2013, Rybak2015, Salzman2013	0.789848	1.72889	0.188572	0.510275	10.0934	9.30352	735.844	685.518	509.786	861.262	329.847	1100.45	1211.24	591.199	1055.45	1475.14
hsa_circ_0093546	chr10:32740519-32762951:+	CCDC7	circBase	847	8	22432	chr10:32735325-32740519|chr10:32762951-32806872	ENSG00000216937.13_2	ENST00000476558.7_1	NM_145023	diencephalon, Sy5y_exp1_D4, cerebellum, Sy5y_exp1_D0, occipital_lobe, frontal_cortex, Sy5y_exp1_D2, parietal_lobe, temporal_lobe, SY5Y_exp2_D4	ANNOTATED, CDS, coding, INTERNAL, OVCODE, OVEXON, UTR5	Rybak2015	-0.937277	0.522218	0.112204	0.397954	10.1376	11.0749	2655.44	2221.08	1668.39	2260.81	1942.43	1961.66	1083.74	369.499	1055.45	1086.94
hsa_circ_0002351	chr10:32759991-32762951:+	CCDC7	circBase	286	3	2960	chr10:32751977-32759991|chr10:32762951-32806872	ENSG00000216937.13_2	ENST00000476558.7_1	NM_145023	Hs68_RNase, Hs68_control, diencephalon, cerebellum, Sy5y_exp1_D0, occipital_lobe, frontal_cortex, Sy5y_exp1_D2, temporal_lobe, platelets	ANNOTATED, CDS, coding, INTERNAL, OVCODE, OVEXON	Jeck2013, Maass2017, Rybak2015	-2.30299	0.202643	0.0431239	0.255384	5.9236	8.22659	447.905	274.207	648.819	0	109.949	0	63.7494	73.8999	75.3892	77.6388
hsa_circ_0000233	chr10:32832227-32873232:+	CCDC7	circBase	808	7	41005	chr10:32807433-32832227|chr10:32873232-32923181	ENSG00000216937.13_2	ENST00000639629.1_2	NM_145023	cd_19, neutr, Hs68_RNase, Hs68_control, SY5Y_exp2_D0, diencephalon, Sy5y_exp1_D4, cerebellum, occipital_lobe, frontal_cortex, parietal_lobe, SY5Y_exp2_D8, temporal_lobe, SY5Y_exp2_D4, vena_cava, right_atrium, neutophils, platelets	ALT_DONOR, CDS, coding, downstream_end, OVCODE, OVEXON, UTR3	Jeck2013, Maass2017, Memczak2013, Rybak2015	0.390356	1.31072	0.55628	0.795782	9.89147	9.50111	831.824	877.463	648.819	825.376	403.147	574.146	2103.73	591.199	1055.45	388.194
hsa_circ_0008679	chr10:32854485-32873232:+	CCDC7	circBase	667	5	18747	chr10:32833229-32854485|chr10:32873232-32923181	ENSG00000216937.13_2	ENST00000639629.1_2	NM_145023	Hs68_RNase, Hs68_control, SY5Y_exp2_D0, diencephalon, cerebellum, occipital_lobe, frontal_cortex, parietal_lobe, temporal_lobe, SY5Y_exp2_D4, ada_scid, adipose, vena_cava, platelets	ALT_DONOR, CDS, coding, downstream_end, OVCODE, OVEXON, UTR3	Jeck2013, Maass2017, Rybak2015	-0.396733	0.759576	0.571038	0.806135	8.92146	9.3182	447.905	493.573	1158.6	610.061	476.446	478.455	254.998	147.8	829.282	698.749
hsa_circ_0018168	chr10:34558584-34573173:-	PARD3	circBase	354	2	14589	chr10:34420511-34558584|chr10:34573173-34606034	ENSG00000148498.15_4	ENST00000545260.5_3	NM_019619	Nhek, Huvec, Hepg2, H1hesc, Gm12878, Bj, Ag04450, A549, Sknshra, SY5Y_exp2_D0, diencephalon, Sy5y_exp1_D4, cerebellum, Sy5y_exp1_D0, occipital_lobe, frontal_cortex, Sy5y_exp1_D2, parietal_lobe, temporal_lobe, SY5Y_exp2_D4, WAS2, adipose, vena_cava, platelets	ANNOTATED, CDS, coding, INTERNAL, OVCODE, OVEXON	Maass2017, Rybak2015, Salzman2013	1.39481	2.62954	0.134169	0.429274	8.00913	6.61432	31.9932	54.8414	92.6884	287.087	0	239.227	127.499	443.399	376.946	77.6388
hsa_circ_0005486	chr10:34648074-34673182:-	PARD3	circBase	1138	6	25108	chr10:34637043-34648074|chr10:34673182-34688257	ENSG00000148498.15_4	ENST00000545260.5_3	NM_019619	Hs68_RNase, Hs68_control, A549, SY5Y_exp2_D0, diencephalon, Sy5y_exp1_D4, cerebellum, occipital_lobe, frontal_cortex, Sy5y_exp1_D2, parietal_lobe, temporal_lobe, SY5Y_exp2_D4	ANNOTATED, CDS, coding, INTERNAL, OVCODE, OVEXON	Jeck2013, Rybak2015, Salzman2013	2.55004	5.8565	0.0891403	0.359625	6.74607	4.19603	0	54.8414	0	0	0	95.691	254.998	147.8	0	0
hsa_circ_0000234	chr10:35349801-35360267:-	CUL2	circBase	339	3	10466	chr10:35343467-35349801|chr10:35360267-35378823	ENSG00000108094.14_2	ENST00000374748.5_1	NM_001198778	HEK293, Hs68_RNase, Hs68_control, Nhek, A549, Sknshra, diencephalon, cerebellum, occipital_lobe, frontal_cortex, Sy5y_exp1_D2, parietal_lobe, temporal_lobe, platelets	ANNOTATED, CDS, coding, INTERNAL, OVCODE, OVEXON	Jeck2013, Maass2017, Memczak2013, Rybak2015, Salzman2013	0.260727	1.19808	0.89299	0.985051	6.87677	6.61604	95.9797	164.524	46.3442	35.8859	109.949	191.382	127.499	221.7	0	0
hsa_circ_0000235	chr10:35805450-35819171:+	CCNY	circBase	315	4	13721	chr10:35790463-35805450|chr10:35819171-35841946	ENSG00000108100.17_2	ENST00000374706.5_1	NM_145012	cd_19, Hs68_RNase, Hs68_control, Nhek, K562, Hepg2, Helas3, H1hesc, Gm12878, Bj, Ag04450, A549, diencephalon, cerebellum, occipital_lobe, frontal_cortex, parietal_lobe, temporal_lobe, neutophils, platelets	ANNOTATED, CDS, coding, INTERNAL, OVCODE, OVEXON	Jeck2013, Maass2017, Memczak2013, Rybak2015, Salzman2013	-0.707983	0.612176	0.558729	0.797478	6.4728	7.18078	63.9865	329.049	0	215.316	73.2994	239.227	0	73.8999	0	77.6388
hsa_circ_0000236	chr10:43650344-43654379:+	CSGALNACT2	circBase	1131	2	4035	chr10:43634015-43650344|chr10:43654379-43655941	ENSG00000169826.7_2	ENST00000374466.3_1	NM_018590	cd_19, Sknshra, diencephalon, cerebellum, occipital_lobe, frontal_cortex, parietal_lobe, temporal_lobe	ANNOTATED, CDS, coding, INTERNAL, UTR5	Memczak2013, Rybak2015, Salzman2013	-1.06218	0.478907	0.197443	0.521192	7.64485	8.70703	511.892	904.884	185.377	287.087	146.599	382.764	254.998	221.7	75.3892	0
hsa_circ_0093655	chr10:43650344-43671480:+	CSGALNACT2	circBase	1589	6	21136	chr10:43634015-43650344|chr10:43671480-43678697	ENSG00000169826.7_2	ENST00000374466.3_1	ENST00000374466.3	diencephalon, Sy5y_exp1_D4, cerebellum, occipital_lobe, frontal_cortex, Sy5y_exp1_D2, parietal_lobe, temporal_lobe	ANNOTATED, CDS, coding, INTERNAL, OVCODE, OVEXON, UTR5	Rybak2015	-2.87259	0.136541	0.0259139	0.195072	4.17271	7.0453	159.966	54.8414	92.6884	179.43	146.599	47.8455	0	0	0	0
hsa_circ_0009002	chr10:43654162-43671480:+	CSGALNACT2	circBase	675	5	17318	chr10:43651258-43654162|chr10:43671480-43678697	ENSG00000169826.7_2	ENST00000374466.3_1	NM_018590	Hs68_RNase, Hs68_control, diencephalon, cerebellum, Sy5y_exp1_D0, occipital_lobe, frontal_cortex, parietal_lobe, temporal_lobe	ANNOTATED, CDS, coding, INTERNAL, OVCODE, OVEXON	Jeck2013, Rybak2015	2.55506	5.8769	0.0338621	0.219534	7.63689	5.08183	0	54.8414	92.6884	0	0	95.691	63.7494	443.399	226.168	155.278
hsa_circ_0002968	chr10:49609654-49618211:+	MAPK8	circBase	499	4	8557	chr10:49514864-49609654|chr10:49618211-49628197	ENSG00000107643.15_4	ENST00000395611.7_4	NM_002750	Hs68_RNase, Hs68_control, Nhek, K562, Huvec, Hepg2, Helas3, H1hesc, Gm12878, Bj, Ag04450, Sknshra, SY5Y_exp2_D0, diencephalon, Sy5y_exp1_D4, cerebellum, Sy5y_exp1_D0, occipital_lobe, frontal_cortex, Sy5y_exp1_D2, parietal_lobe, SY5Y_exp2_D8, temporal_lobe, SY5Y_exp2_D4, WAS2, adipose, vena_cava, right_atrium, platelets	ALT_ACCEPTOR, CDS, coding, OVCODE, OVEXON, upstream_start, UTR5	Jeck2013, Maass2017, Rybak2015, Salzman2013	-0.0540638	0.963219	0.936953	1	8.91659	8.97065	415.912	301.628	1251.29	287.087	256.548	669.837	254.998	147.8	301.557	1009.3
hsa_circ_0002224	chr10:51374369-51387763:+	TIMM23B	circBase	349	4	13394	chr10:51371646-51374369|None	ENSG00000204152.6	ENST00000478381.1		Hs68_RNase, Hs68_control, Nhek, K562, Huvec, Hsmm, Hepg2, Helas3, H1hesc, Gm12878, Bj, Ag04450, A549, Sknshra, Mcf7	INTERGENIC	Jeck2013, Salzman2013	-0.354497	0.782142	0.70447	0.889623	7.76118	8.11568	255.946	274.207	92.6884	322.973	403.147	382.764	191.248	147.8	226.168	77.6388
hsa_circ_0003020	chr10:51606987-51613311:-	TIMM23	circBase	349	4	6324	chr10:51592619-51606987|chr10:51613311-51620323	ENSG00000265354.3_2	ENST00000580018.3_1	NM_006327	Hs68_RNase, Hs68_control, K562, Hepg2, Bj, Ag04450	ANNOTATED, CDS, coding, INTERNAL, OVCODE, OVEXON	Jeck2013, Salzman2013	-1.06637	0.477518	0.272554	0.590186	6.83475	7.90112	383.919	219.366	46.3442	358.859	146.599	239.227	191.248	0	0	77.6388
hsa_circ_0008655	chr10:518378-532470:-	DIP2C	circBase	183	2	14092	chr10:486936-518378|chr10:532470-735433	ENSG00000151240.16_2	ENST00000280886.11_1	NM_014974	Hs68_RNase, Hs68_control, diencephalon, Sy5y_exp1_D4, cerebellum, occipital_lobe, frontal_cortex, Sy5y_exp1_D2, parietal_lobe, temporal_lobe, SY5Y_exp2_D4	ANNOTATED, CDS, coding, INTERNAL, OVCODE, OVEXON	Jeck2013, Rybak2015	-1.19447	0.436948	0.220927	0.545347	6.48819	7.68265	287.939	164.524	185.377	322.973	36.6497	239.227	0	0	0	155.278
hsa_circ_0018401	chr10:52193235-52350007:-	SGMS1	circBase	452	5	156772	chr10:52104105-52193235|chr10:52350007-52383466	ENSG00000198964.13_4	ENST00000429490.5_1	NM_147156	K562, Helas3, Gm12878, Ag04450, A549, Sknshra	ANNOTATED, coding, INTERNAL, OVERLAPTX, OVEXON, UTR5	Salzman2013	-0.408725	0.753289	0.633525	0.846229	9.40228	9.811	447.905	0	787.851	1040.69	2198.98	1770.28	701.244	147.8	527.725	155.278
hsa_circ_0018403	chr10:52220432-52350007:-	SGMS1	circBase	371	4	129575	chr10:52193316-52220432|chr10:52350007-52383466	ENSG00000198964.13_4	ENST00000429490.5_1	NM_147156	K562, Helas3, H1hesc, Ag04450, Sknshra	ANNOTATED, coding, INTERNAL, OVERLAPTX, OVEXON, UTR5	Salzman2013	-1.13154	0.456427	0.172487	0.487262	8.36556	9.4971	63.9865	191.945	1065.92	1220.12	1062.84	909.064	127.499	147.8	0	388.194
hsa_circ_0017586	chr10:5815804-5842668:-	GDI2	circBase	774	6	26864	chr10:5810347-5815804|chr10:5842668-5855176	ENSG00000057608.16_3	ENST00000380191.8_1	NM_001494	K562, Hepg2, Gm12878, Ag04450, A549, SY5Y_exp2_D0, diencephalon, cerebellum, Sy5y_exp1_D0, occipital_lobe, frontal_cortex, Sy5y_exp1_D2, parietal_lobe, temporal_lobe, SY5Y_exp2_D4, ada_scid, platelets	ANNOTATED, CDS, coding, INTERNAL, OVCODE, OVEXON	Maass2017, Rybak2015, Salzman2013	-0.0146265	0.989913	1	1	7.71149	7.72612	159.966	137.104	231.721	215.316	293.197	191.382	509.995	73.8999	226.168	0
hsa_circ_0005379	chr10:5827104-5842668:-	GDI2	circBase	674	5	15564	chr10:5815904-5827104|chr10:5842668-5855176	ENSG00000057608.16_3	ENST00000380191.8_1	NM_001494	Hs68_RNase, Hs68_control, Nhek, K562, Hepg2, Helas3, H1hesc, Ag04450, A549, Sknshra, diencephalon, cerebellum, Sy5y_exp1_D0, occipital_lobe, frontal_cortex, parietal_lobe, temporal_lobe, platelets	ANNOTATED, CDS, coding, INTERNAL, OVCODE, OVEXON	Jeck2013, Maass2017, Rybak2015, Salzman2013	0.715073	1.64157	0.590849	0.821083	7.62126	6.90619	63.9865	0	0	179.43	329.847	191.382	382.497	295.599	75.3892	0
hsa_circ_0002665	chr10:5836847-5842668:-	GDI2	circBase	343	3	5821	chr10:5828013-5836847|chr10:5842668-5855176	ENSG00000057608.16_3	ENST00000380191.8_1	NM_001494	Hs68_RNase, Hs68_control, Nhek, K562, H1hesc, Gm12878, Bj, Ag04450, A549, Sknshra, Mcf7, SY5Y_exp2_D0, diencephalon, cerebellum, occipital_lobe, frontal_cortex, Sy5y_exp1_D2, parietal_lobe, temporal_lobe, chondrocytes, WAS2, vena_cava, platelets	ANNOTATED, CDS, coding, INTERNAL, OVCODE, OVEXON	Jeck2013, Maass2017, Rybak2015, Salzman2013	-0.485081	0.714457	0.463414	0.739632	9.26679	9.75187	1535.68	959.725	648.819	645.947	476.446	287.073	892.492	591.199	603.114	698.749
hsa_circ_0093804	chr10:61844359-61845011:-	ANK3	circBase	326	2	652	chr10:61843375-61844359|chr10:61845011-61846434	ENSG00000151150.21_3	ENST00000280772.6_1	NM_020987	diencephalon, cerebellum, occipital_lobe, frontal_cortex, parietal_lobe, temporal_lobe	ANNOTATED, CDS, coding, INTERNAL, OVCODE, OVEXON	Rybak2015	-3.18442	0.11	0.000828612	0.0356579	5.71199	8.89641	799.831	822.622	278.065	179.43	256.548	191.382	0	0	0	0
hsa_circ_0093805	chr10:61844359-61848116:-	ANK3	circBase	746	4	3757	chr10:61843375-61844359|chr10:61848116-61865662	ENSG00000151150.21_3	ENST00000280772.6_1	NM_020987	diencephalon, cerebellum, occipital_lobe, frontal_cortex, parietal_lobe, temporal_lobe	ANNOTATED, CDS, coding, INTERNAL, OVCODE, OVEXON	Rybak2015	-4.14256	0.0566194	0.000366691	0.0220185	4.17712	8.31967	607.871	520.994	92.6884	107.658	219.898	47.8455	0	0	0	0
hsa_circ_0093859	chr10:64966354-64968995:-	JMJD1C	circBase	2380	2	2641	chr10:64960437-64966354|chr10:64968995-64973232	ENSG00000171988.18_3	ENST00000639129.1_1	NM_032776	diencephalon, cerebellum, occipital_lobe, frontal_cortex, parietal_lobe, temporal_lobe	ANNOTATED, CDS, coding, INTERNAL, OVCODE, OVEXON	Rybak2015	-2.49247	0.177702	0.0555303	0.29261	6.55421	9.04668	767.838	1700.08	92.6884	35.8859	0	47.8455	382.497	0	0	0
hsa_circ_0006743	chr10:65140077-65140242:-	JMJD1C	circBase	165	1	165	chr10:65024524-65140077|chr10:65140242-65225254	ENSG00000171988.18_3	ENST00000399262.6_1	NM_032776	Hs68_RNase, Hs68_control, K562, Gm12878, Ag04450, A549, Sknshra, diencephalon, cerebellum, occipital_lobe, frontal_cortex, parietal_lobe, temporal_lobe, cortex, platelets	ANNOTATED, CDS, coding, INTERNAL, OVCODE, OVEXON	Jeck2013, Maass2017, Rybak2015, Salzman2013	-2.91629	0.132468	0.0025263	0.0620586	6.033	8.94929	671.858	1124.25	185.377	143.544	293.197	191.382	0	73.8999	0	0
hsa_circ_0007626	chr10:65369946-65379560:+	REEP3	circBase	294	2	9614	chr10:65359043-65369946|chr10:65379560-65380572	ENSG00000165476.13_2	ENST00000373758.4_1	NM_001001330	Hs68_RNase, Hs68_control, diencephalon, cerebellum, occipital_lobe, frontal_cortex, parietal_lobe, temporal_lobe, adipose	ANNOTATED, CDS, coding, INTERNAL, OVCODE, OVEXON	Jeck2013, Maass2017, Rybak2015	-3.29612	0.101805	0.0154941	0.156324	4.99255	8.28866	511.892	822.622	0	179.43	0	0	127.499	0	0	0
hsa_circ_0018478	chr10:69714351-69773943:-	HERC4	circBase	1453	12	59592	chr10:69700862-69714351|chr10:69773943-69785302	ENSG00000148634.15_3	ENST00000277817.10_1	NM_022079	Ag04450, A549, Sknshra, diencephalon, Sy5y_exp1_D4, cerebellum, Sy5y_exp1_D0, occipital_lobe, frontal_cortex, Sy5y_exp1_D2, parietal_lobe, temporal_lobe, fibroblasts	ANNOTATED, CDS, coding, INTERNAL, OVCODE, OVEXON	Maass2017, Rybak2015, Salzman2013	-0.814499	0.568606	0.393249	0.688853	6.98091	7.79541	127.973	0	92.6884	610.061	256.548	287.073	63.7494	147.8	0	77.6388
hsa_circ_0093906	chr10:69726439-69773943:-	HERC4	circBase	1018	8	47504	chr10:69718893-69726439|chr10:69773943-69785302	ENSG00000148634.15_3	ENST00000277817.10_1	NM_022079	diencephalon, Sy5y_exp1_D4, cerebellum, occipital_lobe, frontal_cortex, parietal_lobe, temporal_lobe	ANNOTATED, CDS, coding, INTERNAL, OVCODE, OVEXON	Rybak2015	-0.818812	0.566909	0.30909	0.617225	8.18423	9.00304	191.959	109.683	324.409	1076.58	842.943	669.837	254.998	147.8	0	310.555
hsa_circ_0007113	chr10:69785302-69804320:-	HERC4	circBase	682	5	19018	chr10:69773943-69785302|chr10:69804320-69832639	ENSG00000148634.15_3	ENST00000395198.7_1	NM_022079	Hs68_RNase, Hs68_control, Nhek, K562, Huvec, Hmec, Hepg2, Helas3, H1hesc, Gm12878, Bj, Ag04450, A549, Nhlf, Sknshra, Mcf7, diencephalon, Sy5y_exp1_D4, cerebellum, occipital_lobe, frontal_cortex, parietal_lobe, temporal_lobe, right_atrium	ANNOTATED, CDS, coding, INTERNAL, OVCODE, OVEXON	Jeck2013, Maass2017, Rybak2015, Salzman2013	0.839085	1.78892	0.434756	0.718197	7.6827	6.84361	63.9865	0	92.6884	251.202	146.599	191.382	127.499	221.7	0	465.833
hsa_circ_0000239	chr10:70152894-70154208:-	RUFY2	circBase	252	3	1314	chr10:70145885-70152894|chr10:70154208-70156536	ENSG00000204130.12_2	ENST00000466493.5_1	NM_017987	HEK293, Hs68_RNase, Hs68_control, diencephalon, cerebellum, occipital_lobe, frontal_cortex, parietal_lobe, temporal_lobe, ada_scid	ANNOTATED, CDS, coding, INTERNAL, OVCODE, OVEXON	Jeck2013, Maass2017, Memczak2013, Rybak2015	-2.27131	0.207142	0.0151568	0.155597	6.57055	8.84186	479.898	246.786	787.851	179.43	586.395	47.8455	382.497	0	0	0
hsa_circ_0006151	chr10:70227879-70229920:-	DNA2	circBase	367	2	2041	chr10:70225569-70227879|chr10:70229920-70231547	ENSG00000138346.14_3	ENST00000551118.6_1	NM_001080449	Hs68_RNase, Hs68_control, K562, Huvec, Hepg2, H1hesc, Gm12878, Bj, SY5Y_exp2_D0, diencephalon, Sy5y_exp1_D4, cerebellum, Sy5y_exp1_D0, occipital_lobe, frontal_cortex, Sy5y_exp1_D2, parietal_lobe, temporal_lobe, WAS2, umbilical_cord, platelets	ANNOTATED, CDS, coding, INTERNAL, OVCODE, OVEXON	Jeck2013, Maass2017, Rybak2015, Salzman2013	-0.873034	0.545997	0.463957	0.739632	6.40679	7.27982	255.946	54.8414	185.377	0	256.548	0	318.747	73.8999	0	0
hsa_circ_0007778	chr10:70246900-70266475:-	SLC25A16	circBase	619	6	19575	chr10:70243345-70246900|chr10:70266475-70276507	ENSG00000122912.14_3	ENST00000609923.5_1	NM_152707	Hs68_RNase, Hs68_control, Nhek, K562, Hepg2, H1hesc, Gm12878, Bj, Ag04450, Sknshra, Mcf7, diencephalon, cerebellum, Sy5y_exp1_D0, occipital_lobe, frontal_cortex, parietal_lobe, temporal_lobe, cortex, vena_cava, right_atrium	ANNOTATED, CDS, coding, INTERNAL, OVCODE, OVEXON	Jeck2013, Maass2017, Rybak2015, Salzman2013	0.636525	1.55458	0.439476	0.721836	9.20497	8.56844	127.973	191.945	324.409	538.289	696.344	1291.83	892.492	147.8	452.335	77.6388
hsa_circ_0093996	chr10:70404454-70406762:+	TET1	circBase	2308	1	2308	chr10:70360791-70404454|chr10:70406762-70411602	ENSG00000138336.8_3	ENST00000373644.4_1	NM_030625	SY5Y_exp2_D0, diencephalon, cerebellum, Sy5y_exp1_D0, occipital_lobe, frontal_cortex, Sy5y_exp1_D2, parietal_lobe, SY5Y_exp2_D8, temporal_lobe, SY5Y_exp2_D4	ANNOTATED, CDS, coding, INTERNAL, OVCODE, OVEXON	Rybak2015	0.425424	1.34297	0.648236	0.853517	8.43911	8.01369	351.926	520.994	0	71.7719	293.197	478.455	446.246	147.8	75.3892	543.471
hsa_circ_0008783	chr10:70411602-70412351:+	TET1	circBase	185	2	749	chr10:70406762-70411602|chr10:70412351-70426801	ENSG00000138336.8_3	ENST00000373644.4_1	NM_030625	Hs68_RNase, Hs68_control, diencephalon, Sy5y_exp1_D4, cerebellum, occipital_lobe, frontal_cortex, parietal_lobe, temporal_lobe, SY5Y_exp2_D4, vena_cava, platelets	ANNOTATED, CDS, coding, INTERNAL, OVCODE, OVEXON	Jeck2013, Maass2017, Rybak2015	-1.18076	0.441118	0.268155	0.587881	6.81193	7.9927	223.953	164.524	695.163	107.658	73.2994	0	382.497	0	150.778	0
hsa_circ_0006272	chr10:70497601-70502326:+	CCAR1	circBase	272	3	4725	chr10:70496805-70497601|chr10:70502326-70506917	ENSG00000060339.13_3	ENST00000630771.2_1	NM_018237	Hs68_RNase, Hs68_control, Nhek, K562, Hepg2, Helas3, H1hesc, Gm12878, Ag04450, A549, Sknshra, diencephalon, cerebellum, occipital_lobe, frontal_cortex, parietal_lobe, temporal_lobe	ANNOTATED, CDS, coding, INTERNAL, OVCODE, OVEXON	Jeck2013, Rybak2015, Salzman2013	0.565998	1.48041	0.520068	0.774216	8.58549	8.0195	31.9932	767.78	231.721	71.7719	146.599	95.691	382.497	221.7	753.892	465.833
hsa_circ_0002371	chr10:70545892-70546449:+	CCAR1	circBase	230	2	557	chr10:70532856-70545892|chr10:70546449-70547683	ENSG00000060339.13_3	ENST00000630771.2_1	NM_018237	Hs68_RNase, Hs68_control, K562, Bj, diencephalon, cerebellum, occipital_lobe, frontal_cortex, Sy5y_exp1_D2, parietal_lobe, temporal_lobe, platelets	ANNOTATED, CDS, coding, INTERNAL, OVCODE, OVEXON	Jeck2013, Maass2017, Rybak2015, Salzman2013	0.311051	1.24061	0.808692	0.948248	7.65277	7.34172	95.9797	137.104	0	287.087	256.548	191.382	318.747	0	0	465.833
hsa_circ_0002758	chr10:71243446-71244971:+	TSPAN15	circBase	261	2	1525	chr10:71211446-71243446|chr10:71244971-71255349	ENSG00000099282.9_3	ENST00000373290.6_1	NM_012339	Hs68_RNase, Hs68_control, diencephalon, cerebellum, frontal_cortex, platelets	ANNOTATED, CDS, coding, INTERNAL, OVCODE, OVEXON	Jeck2013, Maass2017, Rybak2015	-4.07814	0.059205	0.000280717	0.0199548	4.90228	8.98042	1311.72	520.994	324.409	179.43	146.599	95.691	0	0	0	0
hsa_circ_0094061	chr10:71243446-71258152:+	TSPAN15	circBase	474	4	14706	chr10:71211446-71243446|chr10:71258152-71264193	ENSG00000099282.9_3	ENST00000373290.6_1	NM_012339	diencephalon, cerebellum, parietal_lobe, temporal_lobe	ANNOTATED, CDS, coding, INTERNAL, OVCODE, OVEXON	Rybak2015	-1.93203	0.262061	0.0841244	0.356189	6.53503	8.46706	671.858	740.359	278.065	0	36.6497	191.382	0	0	0	232.916
hsa_circ_0004977	chr10:72604229-72619256:+	SGPL1	circBase	588	5	15027	chr10:72576636-72604229|chr10:72619256-72628101	ENSG00000166224.16_3	ENST00000373202.7_1	NM_003901	Hs68_RNase, Hs68_control, diencephalon, cerebellum, occipital_lobe, frontal_cortex, parietal_lobe, temporal_lobe	ANNOTATED, CDS, coding, INTERNAL, OVCODE, OVEXON	Jeck2013, Rybak2015	-1.3678	0.387481	0.105027	0.385109	7.5428	8.91061	95.9797	274.207	463.442	1040.69	513.096	430.609	63.7494	221.7	150.778	0
hsa_circ_0017628	chr10:7262372-7327916:-	SFMBT2	circBase	894	7	65544	chr10:7247890-7262372|chr10:7327916-7409610	ENSG00000198879.11_3	ENST00000361972.8_1	NM_001029880	K562, H1hesc, Gm12878, Ag04450, Sknshra, diencephalon, Sy5y_exp1_D4, cerebellum, Sy5y_exp1_D0, occipital_lobe, frontal_cortex, Sy5y_exp1_D2, parietal_lobe, temporal_lobe, SY5Y_exp2_D4, adipose, decidua	ANNOTATED, CDS, coding, INTERNAL, OVCODE, OVEXON	Maass2017, Rybak2015, Salzman2013	0.565883	1.48029	0.50528	0.768755	7.84614	7.28026	159.966	191.945	139.033	179.43	73.2994	143.536	446.246	73.8999	226.168	232.916
hsa_circ_0017636	chr10:7285519-7327916:-	SFMBT2	circBase	684	5	42397	chr10:7269899-7285519|chr10:7327916-7409610	ENSG00000198879.11_3	ENST00000361972.8_1	NM_001029880	Nhek, K562, Hepg2, Helas3, H1hesc, Gm12878, Bj, Ag04450, A549, Sknshra, SY5Y_exp2_D0, diencephalon, cerebellum, Sy5y_exp1_D0, occipital_lobe, frontal_cortex, Sy5y_exp1_D2, parietal_lobe, temporal_lobe, WAS2, decidua	ANNOTATED, CDS, coding, INTERNAL, OVCODE, OVEXON	Maass2017, Rybak2015, Salzman2013	0.925701	1.89961	0.131306	0.428072	10.16	9.23425	735.844	630.676	556.13	322.973	732.994	1148.29	892.492	886.798	678.503	2096.25
hsa_circ_0000211	chr10:7318853-7327916:-	SFMBT2	circBase	434	3	9063	chr10:7290611-7318853|chr10:7327916-7409610	ENSG00000198879.11_3	ENST00000361972.8_1	NM_001018039	HEK293, Nhek, K562, Huvec, Hepg2, Helas3, H1hesc, Gm12878, Ag04450, A549, Sknshra, SY5Y_exp2_D0, diencephalon, Sy5y_exp1_D4, cerebellum, Sy5y_exp1_D0, occipital_lobe, frontal_cortex, Sy5y_exp1_D2, parietal_lobe, temporal_lobe, SY5Y_exp2_D4, WAS2, ada_scid, cortex, adipose, decidua, vena_cava, right_atrium, umbilical_cord, muscle, LCL, platelets	ANNOTATED, CDS, coding, INTERNAL	Maass2017, Memczak2013, Rybak2015, Salzman2013	0.495627	1.40993	0.388067	0.683951	12.1395	11.6438	3359.29	4195.37	3800.22	1901.95	2712.08	2392.27	2613.73	5394.69	5578.8	6599.29
hsa_circ_0017641	chr10:7318853-7423911:-	SFMBT2	circBase	921	6	105058	chr10:7290611-7318853|chr10:7423911-7451263	ENSG00000198879.11_3	ENST00000361972.8_1	NM_001029880	K562, Gm12878, A549	ANNOTATED, CDS, coding, INTERNAL, OVCODE, OVERLAPTX, OVEXON, UTR5	Salzman2013	2.14907	4.43543	0.0457939	0.26246	7.7444	5.59533	0	54.8414	92.6884	0	73.2994	95.691	127.499	73.8999	226.168	543.471
hsa_circ_0017648	chr10:7409610-7423911:-	SFMBT2	circBase	487	3	14301	chr10:7327916-7409610|chr10:7423911-7451263	ENSG00000198879.11_3	ENST00000361972.8_1	NM_001029880	K562, Hepg2, Helas3, H1hesc, Gm12878, A549, Sknshra, diencephalon, cerebellum, occipital_lobe, frontal_cortex, parietal_lobe, temporal_lobe	ANNOTATED, CDS, coding, INTERNAL, OVCODE, OVERLAPTX, OVEXON, UTR5	Rybak2015, Salzman2013	3.49874	11.3038	0.00021727	0.017531	8.81588	5.31714	31.9932	54.8414	46.3442	35.8859	0	143.536	382.497	812.899	603.114	310.555
hsa_circ_0008662	chr10:74100546-74100928:-	DNAJB12	circBase	266	2	382	chr10:74098069-74100546|chr10:74100928-74103123	ENSG00000148719.14_2	ENST00000338820.7_1	NM_001002762	Hs68_RNase, Hs68_control, Nhek, K562, Huvec, Hsmm, Hepg2, Helas3, H1hesc, Gm12878, Bj, Ag04450, A549, Nhlf, Sknshra, Mcf7, diencephalon, cerebellum, occipital_lobe, frontal_cortex, parietal_lobe, temporal_lobe, neutophils	ANNOTATED, CDS, coding, INTERNAL, OVCODE, OVEXON	Jeck2013, Maass2017, Rybak2015, Salzman2013	1.4586	2.74841	0.139587	0.435281	8.29128	6.83268	31.9932	137.104	278.065	107.658	0	191.382	509.995	0	376.946	465.833
hsa_circ_0006628	chr10:74322652-74326552:-	MICU1	circBase	331	2	3900	chr10:74311099-74322652|chr10:74326552-74385767	ENSG00000107745.18_3	ENST00000398761.8_1	NM_006077	Hs68_RNase, Hs68_control, diencephalon, cerebellum, Sy5y_exp1_D0, occipital_lobe, frontal_cortex, parietal_lobe, temporal_lobe	ANNOTATED, CDS, coding, INTERNAL, OVCODE, OVEXON, UTR5	Jeck2013, Rybak2015	-0.770997	0.586012	0.548196	0.791909	6.52985	7.30085	255.946	191.945	278.065	35.8859	0	0	0	0	301.557	155.278
hsa_circ_0000246	chr10:74468040-74475660:+	MCU	circBase	239	3	7620	chr10:74452059-74468040|chr10:74475660-74594116	ENSG00000156026.14_3	ENST00000604679.5_1	NM_138357	cd_19, Hs68_RNase, Hs68_control, diencephalon, cerebellum, occipital_lobe, frontal_cortex, parietal_lobe, temporal_lobe, decidua, vena_cava, muscle, platelets	ALT_ACCEPTOR, ALT_DONOR, coding, INTERNAL, intronic	Jeck2013, Maass2017, Memczak2013, Rybak2015	-3.883	0.06778	0.000153639	0.0148989	6.08006	9.96306	1919.59	2330.76	139.033	394.745	146.599	95.691	191.248	0	0	0
hsa_circ_0004568	chr10:75296026-75299351:-	USP54	circBase	319	2	3325	chr10:75294528-75296026|chr10:75299351-75301132	ENSG00000166348.18_3	ENST00000424265.5_3	NM_152586	Hs68_RNase, Hs68_control, Nhek, K562, Hepg2, Helas3, H1hesc, Gm12878, Bj, Ag04450, A549, Sknshra, diencephalon, cerebellum, frontal_cortex, parietal_lobe, temporal_lobe	ANNOTATED, CDS, coding, INTERNAL, OVCODE, OVEXON	Jeck2013, Rybak2015, Salzman2013	0.660502	1.58063	0.512128	0.77013	7.71584	7.05533	95.9797	54.8414	324.409	0	183.248	47.8455	382.497	221.7	150.778	232.916
hsa_circ_0007221	chr10:75331178-75336119:-	USP54	circBase	483	3	4941	None|chr10:75336119-75366126	ENSG00000166348.18_3	ENST00000433394.1_1	NM_152586	Hs68_RNase, Hs68_control, diencephalon, cerebellum, occipital_lobe, frontal_cortex, parietal_lobe, temporal_lobe	ALT_ACCEPTOR, CDS, coding, OVCODE, OVEXON, upstream_start, UTR5	Jeck2013, Rybak2015	0.276518	1.21127	0.790369	0.939338	8.22701	7.95049	287.939	137.104	324.409	430.631	36.6497	287.073	637.494	221.7	150.778	155.278
hsa_circ_0094177	chr10:75576780-75583842:-	CAMK2G	circBase	265	4	7062	chr10:75575005-75576780|chr10:75583842-75597225	ENSG00000148660.20_2	ENST00000351293.7_1	ENST00000472912.1	diencephalon, cerebellum, occipital_lobe, frontal_cortex, parietal_lobe	ANNOTATED, INTERNAL, ncRNA, OVCODE, OVERLAPTX, OVEXON	Rybak2015	-2.6428	0.160118	0.00759095	0.109673	5.82806	8.47085	287.939	411.311	509.786	394.745	146.599	95.691	0	0	150.778	0
hsa_circ_0005164	chr10:76598440-76603236:+	KAT6B	circBase	949	2	4796	chr10:76586543-76598440|chr10:76603236-76719727	ENSG00000156650.12_2	ENST00000372724.5_1	NM_012330	Hs68_RNase, Hs68_control, Nhek, Huvec, Hepg2, Helas3, H1hesc, Gm12878, Bj, Ag04450, A549, Nhlf, Sknshra, diencephalon, Sy5y_exp1_D4, cerebellum, Sy5y_exp1_D0, occipital_lobe, frontal_cortex, Sy5y_exp1_D2, parietal_lobe, SY5Y_exp2_D8, temporal_lobe, SY5Y_exp2_D4	ANNOTATED, CDS, coding, INTERNAL, OVCODE, OVEXON, UTR5	Jeck2013, Rybak2015, Salzman2013	-0.103445	0.930807	0.930647	0.998724	8.55963	8.66307	479.898	82.2622	92.6884	645.947	696.344	861.219	191.248	0	150.778	621.11
hsa_circ_0005235	chr10:76602357-76603236:+	KAT6B	circBase	879	1	879	chr10:76585432-76602357|chr10:76603236-76719727	ENSG00000156650.12_2	ENST00000372725.5_1	NM_012330	Hs68_RNase, Hs68_control, K562, Huvec, Hsmm, Helas3, H1hesc, Gm12878, Bj, Ag04450, A549, Sknshra, Mcf7, diencephalon, Sy5y_exp1_D4, cerebellum, Sy5y_exp1_D0, occipital_lobe, frontal_cortex, Sy5y_exp1_D2, parietal_lobe, temporal_lobe	ANNOTATED, CDS, coding, INTERNAL, OVCODE, OVEXON, UTR5	Jeck2013, Rybak2015, Salzman2013	0.0531066	1.0375	1	1	7.78025	7.72714	159.966	164.524	278.065	322.973	109.949	1004.76	0	0	0	0
hsa_circ_0006148	chr10:76910271-76910864:+	SAMD8	circBase	593	1	593	chr10:76859486-76910271|chr10:76910864-76924402	ENSG00000156671.12_3	ENST00000447533.5_3	NM_144660	Hs68_RNase, Hs68_control, Nhek, Hepg2, Gm12878, Bj, Ag04450, Sknshra, diencephalon, cerebellum, occipital_lobe, frontal_cortex, parietal_lobe, temporal_lobe	ANNOTATED, CDS, coding, INTERNAL, OVCODE, OVEXON, UTR5	Jeck2013, Rybak2015, Salzman2013	2.15473	4.45286	0.107489	0.388164	7.39005	5.23531	31.9932	82.2622	0	35.8859	0	0	509.995	147.8	0	155.278
hsa_circ_0007292	chr10:7839009-7844817:+	ATP5C1	circBase	799	6	5808	chr10:7838118-7839009|chr10:7844817-7848936	ENSG00000165629.19_2	ENST00000356708.11_1	NM_001001973	Hs68_RNase, Hs68_control, Nhek, K562, Huvec, Hepg2, Helas3, H1hesc, Gm12878, Bj, Ag04450, A549, Nhlf, Sknshra, Mcf7, SY5Y_exp2_D0, diencephalon, Sy5y_exp1_D4, cerebellum, Sy5y_exp1_D0, occipital_lobe, frontal_cortex, Sy5y_exp1_D2, parietal_lobe, SY5Y_exp2_D8, temporal_lobe, WAS2, adipose, vena_cava, MSC_047, LCL, platelets	ANNOTATED, CDS, coding, INTERNAL, OVCODE, OVEXON	Jeck2013, Maass2017, Rybak2015, Salzman2013	-1.2047	0.433858	0.0567457	0.294537	10.4293	11.634	5214.9	5072.83	3383.13	1148.35	1026.19	1435.36	1848.73	886.798	1055.45	1630.41
hsa_circ_0006561	chr10:78704530-78729825:-	KCNMA1	circBase	636	4	25295	chr10:78674807-78704530|chr10:78729825-78771724	ENSG00000156113.22_4	ENST00000604624.6_4	NM_001161353	Hs68_RNase, Hs68_control, diencephalon, cerebellum, occipital_lobe, frontal_cortex, parietal_lobe, temporal_lobe	ANNOTATED, CDS, coding, INTERNAL, OVCODE, OVEXON	Jeck2013, Rybak2015	-0.507601	0.703391	0.625331	0.840064	7.31106	7.81866	0	54.8414	185.377	574.175	293.197	430.609	0	0	0	310.555
hsa_circ_0018992	chr10:86130769-86133571:+	FAM190B	circBase	1653	2	2802	chr10:86088564-86130769|chr10:86133571-86177526	ENSG00000107771.15_3	ENST00000372088.6_1	NM_018999	K562, Hepg2, H1hesc, Gm12878, Bj, Ag04450, A549, Sknshra, diencephalon, cerebellum, Sy5y_exp1_D0, occipital_lobe, frontal_cortex, parietal_lobe, temporal_lobe	ANNOTATED, CDS, coding, INTERNAL, OVCODE, OVEXON, UTR5	Rybak2015, Salzman2013	0.0644678	1.0457	1	1	7.14438	7.07992	159.966	191.945	185.377	0	109.949	430.609	127.499	0	75.3892	0
hsa_circ_0006956	chr10:86177526-86185649:+	FAM190B	circBase	254	2	8123	chr10:86133571-86177526|chr10:86185649-86198267	ENSG00000107771.15_3	ENST00000372088.6_1	NM_018999	Hs68_RNase, Hs68_control, Nhek, K562, Huvec, Hepg2, Helas3, H1hesc, Gm12878, Bj, Ag04450, A549, Sknshra, SY5Y_exp2_D0, diencephalon, Sy5y_exp1_D4, cerebellum, Sy5y_exp1_D0, occipital_lobe, frontal_cortex, Sy5y_exp1_D2, parietal_lobe, temporal_lobe, EPC, adipose, vena_cava, umbilical_cord, muscle, platelets	ANNOTATED, CDS, coding, INTERNAL, OVCODE, OVEXON	Jeck2013, Maass2017, Rybak2015, Salzman2013	-0.0467032	0.968146	0.954513	1	9.66185	9.70856	607.871	877.463	1343.98	645.947	696.344	621.991	1274.99	591.199	603.114	931.665
hsa_circ_0018996	chr10:86177526-86237420:+	FAM190B	circBase	711	6	59894	chr10:86133571-86177526|chr10:86237420-86273204	ENSG00000107771.15_3	ENST00000372088.6_1	NM_018999	K562, diencephalon, cerebellum, occipital_lobe, frontal_cortex, parietal_lobe, temporal_lobe	ANNOTATED, CDS, coding, INTERNAL, OVCODE, OVEXON	Rybak2015, Salzman2013	1.59309	3.01696	0.062888	0.30868	8.30663	6.71353	191.959	0	92.6884	143.544	73.2994	191.382	318.747	443.399	150.778	465.833
hsa_circ_0018998	chr10:86198267-86237420:+	FAM190B	circBase	457	4	39153	chr10:86185649-86198267|chr10:86237420-86273204	ENSG00000107771.15_3	ENST00000372088.6_1	NM_018999	K562, diencephalon, Sy5y_exp1_D4, cerebellum, Sy5y_exp1_D0, occipital_lobe, frontal_cortex, Sy5y_exp1_D2, parietal_lobe, SY5Y_exp2_D8, temporal_lobe, SY5Y_exp2_D4, WAS2, cortex, decidua, VSMC, vena_cava, right_atrium, platelets, MSC	ANNOTATED, CDS, coding, INTERNAL, OVCODE, OVEXON	Maass2017, Rybak2015, Salzman2013	0.225501	1.16918	0.709387	0.892366	10.0872	9.86174	735.844	1288.77	509.786	753.605	1319.39	909.064	1784.98	1330.2	678.503	698.749
hsa_circ_0007229	chr10:89527429-89536184:-	ATAD1	circBase	248	3	8755	chr10:89516679-89527429|chr10:89536184-89544226	ENSG00000138138.13_2	ENST00000308448.11_1	NM_032810	Hs68_RNase, Hs68_control, Nhek, K562, Hepg2, Helas3, H1hesc, Gm12878, Ag04450, Sknshra, diencephalon, occipital_lobe, frontal_cortex	ANNOTATED, CDS, coding, INTERNAL, OVCODE, OVEXON	Jeck2013, Rybak2015, Salzman2013	0.599911	1.51562	0.568217	0.804761	7.59695	6.99704	95.9797	109.683	0	251.202	146.599	47.8455	446.246	147.8	301.557	0
hsa_circ_0019061	chr10:90661412-90682193:+	STAMBPL1	circBase	1307	9	20781	chr10:90640395-90661412|chr10:90682193-90682924	ENSG00000138134.11_3	ENST00000371926.7_1	NM_020799	Helas3, Gm12878, A549, Nhlf, diencephalon, cerebellum, occipital_lobe, frontal_cortex, parietal_lobe	ANNOTATED, CDS, coding, INTERNAL, OVCODE, OVEXON, UTR5	Rybak2015, Salzman2013	0.0855575	1.0611	1	1	8.22044	8.13488	0	109.683	185.377	502.403	586.395	287.073	127.499	73.8999	980.06	0
hsa_circ_0019079	chr10:91511102-91522592:+	KIF20B	circBase	893	6	11490	chr10:91505716-91511102|chr10:91522592-91528046	ENSG00000138182.14_2	ENST00000260753.8_1	NM_016195	K562, Helas3, H1hesc, Gm12878, Ag04450, diencephalon, Sy5y_exp1_D4, cerebellum, Sy5y_exp1_D0, occipital_lobe, frontal_cortex, Sy5y_exp1_D2, parietal_lobe, temporal_lobe, WAS2, adipose, platelets	ANNOTATED, CDS, coding, INTERNAL, OVCODE, OVEXON	Maass2017, Rybak2015, Salzman2013	-1.24425	0.422126	0.236001	0.560657	6.68445	7.9287	255.946	246.786	556.13	35.8859	109.949	0	127.499	73.8999	150.778	155.278
hsa_circ_0019146	chr10:93902785-93940776:-	CPEB3	circBase	315	3	37991	chr10:93870951-93902785|chr10:93940776-93952302	ENSG00000107864.14_2	ENST00000412050.8_1	NM_001178137	K562, Helas3, Gm12878, diencephalon, cerebellum, occipital_lobe, frontal_cortex, parietal_lobe, temporal_lobe	ANNOTATED, CDS, coding, INTERNAL, OVCODE, OVERLAPTX, OVEXON	Rybak2015, Salzman2013	-0.763708	0.58898	0.419247	0.70841	7.6664	8.43011	287.939	795.201	46.3442	215.316	329.847	430.609	0	73.8999	0	465.833
hsa_circ_0000251	chr10:94291504-94297307:-	IDE	circBase	563	3	5803	chr10:94274799-94291504|chr10:94297307-94333678	ENSG00000119912.15_2	ENST00000265986.10_1	NM_004969	cd_19, Nhek, K562, Huvec, H1hesc, Bj, diencephalon, Sy5y_exp1_D4, cerebellum, Sy5y_exp1_D0, occipital_lobe, frontal_cortex, parietal_lobe, temporal_lobe, platelets	ANNOTATED, CDS, coding, INTERNAL	Maass2017, Memczak2013, Rybak2015, Salzman2013	1.06431	2.09117	0.236713	0.561242	8.23752	7.17321	159.966	274.207	139.033	35.8859	73.2994	574.146	127.499	147.8	527.725	77.6388
hsa_circ_0019172	chr10:94653105-94679807:+	EXOC6	circBase	787	7	26702	chr10:94594581-94653105|chr10:94679807-94688095	ENSG00000138190.16_3	ENST00000371552.8_1	NM_019053	K562, Huvec, Hepg2, Gm12878, Bj, Ag04450, A549, Sknshra, diencephalon, cerebellum, occipital_lobe, frontal_cortex, parietal_lobe, temporal_lobe, platelets	ANNOTATED, CDS, coding, INTERNAL, OVCODE, OVEXON	Maass2017, Rybak2015, Salzman2013	-1.02097	0.492784	0.30654	0.614032	6.74733	7.7683	191.959	109.683	185.377	394.745	183.248	382.764	0	0	0	77.6388
chr10:95436409-95447206:-	chr10:95436409-95447206:-	FRA10AC1	CIRCexplorer2	361	5	10797	chr10:95430605-95436409|chr10:95447206-95451765	ENSG00000148690.11_2	ENST00000359204.4_1	NA	NA	NA	NA	0.958948	1.94389	0.454199	0.732154	7.48613	6.52718	95.9797	109.683	0	71.7719	146.599	239.227	382.497	0	226.168	0
hsa_circ_0019230	chr10:96018556-96018907:+	PLCE1	circBase	260	2	351	chr10:96014806-96018556|chr10:96018907-96022250	ENSG00000138193.15_3	ENST00000371380.7_1	NM_016341	Bj, Ag04450, A549, Sknshra, diencephalon, cerebellum, occipital_lobe, frontal_cortex, parietal_lobe, temporal_lobe	ANNOTATED, CDS, coding, INTERNAL, OVCODE, OVERLAPTX, OVEXON	Rybak2015, Salzman2013	5.11108	34.5611	0.00607519	0.0983896	7.61271	2.50164	0	0	0	0	0	0	0	665.099	150.778	155.278
hsa_circ_0008874	chr10:96201652-96234540:+	TBC1D12	circBase	240	2	32888	chr10:96163341-96201652|chr10:96234540-96253121	ENSG00000108239.8_2	ENST00000225235.4_1	NM_015188	Hs68_RNase, Hs68_control, diencephalon, cerebellum, occipital_lobe, frontal_cortex, parietal_lobe, temporal_lobe, vena_cava	ANNOTATED, CDS, coding, INTERNAL, OVCODE, OVEXON	Jeck2013, Maass2017, Rybak2015	-1.62214	0.324854	0.0699659	0.325199	7.78381	9.40595	63.9865	219.366	1992.8	610.061	513.096	382.764	0	369.499	0	310.555
hsa_circ_0094606	chr10:97098889-97106209:-	SORBS1	circBase	483	4	7320	chr10:97097051-97098889|chr10:97106209-97110965	ENSG00000095637.21_3	ENST00000371227.8_1	ENST00000371247.2	diencephalon, cerebellum, occipital_lobe, frontal_cortex, parietal_lobe, temporal_lobe	ANNOTATED, CDS, coding, INTERNAL, OVCODE, OVERLAPTX, OVEXON	Rybak2015	2.51399	5.71196	0.0439283	0.257195	7.56584	5.05185	0	27.4207	0	107.658	0	191.382	127.499	221.7	301.557	77.6388
hsa_circ_0094617	chr10:97141441-97170534:-	SORBS1	circBase	705	7	29093	chr10:97135813-97141441|chr10:97170534-97174250	ENSG00000095637.21_3	ENST00000371227.8_1	ENST00000371246.2	diencephalon, cerebellum, occipital_lobe, frontal_cortex, parietal_lobe, temporal_lobe	ANNOTATED, CDS, coding, INTERNAL, OVCODE, OVERLAPTX, OVEXON	Rybak2015	3.94554	15.4073	1.65014e-05	0.00710111	11.0985	7.15295	0	109.683	185.377	251.202	146.599	717.682	127.499	1625.8	6332.7	2173.89
hsa_circ_0094618	chr10:97141441-97192333:-	SORBS1	circBase	1343	11	50892	chr10:97135813-97141441|chr10:97192333-97194378	ENSG00000095637.21_3	ENST00000371227.8_1	ENST00000474353.2	diencephalon, frontal_cortex	ANNOTATED, INTERNAL, ncRNA, OVCODE, OVERLAPTX, OVEXON	Rybak2015	2.07607	4.21658	0.0948904	0.370471	8.04404	5.96796	159.966	0	92.6884	35.8859	0	0	318.747	295.599	0	698.749
chr10:97154757-97170534:-	chr10:97154757-97170534:-	SORBS1	CIRCexplorer2	487	5	15777	chr10:97146876-97154757|chr10:97170534-97174250	ENSG00000095637.21_3	ENST00000371246.6_1	NA	NA	NA	NA	7.48522	179.174	0.000126134	0.014419	9.98686	2.50164	0	0	0	0	0	47.8455	0	147.8	3241.74	1630.41
hsa_circ_0094619	chr10:97154757-97192333:-	SORBS1	circBase	1125	9	37576	chr10:97146876-97154757|chr10:97192333-97194378	ENSG00000095637.21_3	ENST00000371246.6_1	ENST00000371247.2	diencephalon, cerebellum, occipital_lobe, parietal_lobe	ANNOTATED, CDS, coding, INTERNAL, OVCODE, OVERLAPTX, OVEXON	Rybak2015	1.19158	2.28402	0.228525	0.554782	8.69443	7.50286	351.926	191.945	185.377	71.7719	73.2994	0	1657.49	147.8	75.3892	155.278
hsa_circ_0094647	chr10:98303832-98336586:-	TM9SF3	circBase	1083	8	32754	chr10:98292947-98303832|chr10:98336586-98346490	ENSG00000077147.14_2	ENST00000371142.8_1	ENST00000371142.4	diencephalon, cerebellum, Sy5y_exp1_D0, occipital_lobe, frontal_cortex, Sy5y_exp1_D2, parietal_lobe, temporal_lobe	ANNOTATED, CDS, coding, INTERNAL, OVCODE, OVERLAPTX, OVEXON	Rybak2015	-2.25994	0.20878	0.0562048	0.293267	5.56686	7.8268	31.9932	301.628	231.721	358.859	183.248	0	0	0	150.778	77.6388
hsa_circ_0007707	chr10:98667021-98667504:+	LCOR	circBase	146	2	483	chr10:98593236-98667021|chr10:98667504-98703869	ENSG00000196233.13_4	ENST00000371103.8_2	NM_032440	Hs68_RNase, Hs68_control, K562, H1hesc, Gm12878, Ag04450, A549, Sknshra, diencephalon, cerebellum, Sy5y_exp1_D0, occipital_lobe, frontal_cortex, Sy5y_exp1_D2, parietal_lobe, temporal_lobe, SY5Y_exp2_D4, cortex, platelets	ANNOTATED, coding, INTERNAL, OVEXON, UTR5	Jeck2013, Maass2017, Rybak2015, Salzman2013	-1.52196	0.348211	0.0897573	0.359648	7.088	8.60996	351.926	548.414	370.753	502.403	146.599	382.764	0	0	0	232.916
hsa_circ_0004896	chr10:99196947-99197507:-	EXOSC1	circBase	136	2	560	chr10:99196308-99196947|chr10:99197507-99198426	ENSG00000171311.12_3	ENST00000370902.7_1	NM_016046	Hs68_RNase, Hs68_control, Nhek, K562, Huvec, Hepg2, Helas3, H1hesc, Gm12878, Bj, Ag04450, A549, Sknshra, Mcf7, diencephalon, cerebellum, occipital_lobe, frontal_cortex, parietal_lobe, temporal_lobe	ANNOTATED, CDS, coding, INTERNAL, OVCODE, OVEXON	Jeck2013, Rybak2015, Salzman2013	-5.14564	0.0282494	0.00189722	0.0531504	2.50164	7.64727	255.946	466.152	92.6884	143.544	0	0	0	0	0	0
hsa_circ_0094725	chr11:101946603-101952012:+	C11orf70	circBase	240	2	5409	chr11:101937382-101946603|chr11:101952012-101953801	ENSG00000137691.12_3	ENST00000434758.6_1	NM_032930	diencephalon, parietal_lobe, temporal_lobe	ANNOTATED, CDS, coding, INTERNAL, OVCODE, OVEXON	Rybak2015	1.33461	2.52207	0.477398	0.750239	6.72196	5.38735	0	0	0	0	183.248	191.382	0	0	301.557	0
hsa_circ_0024142	chr11:103173821-103182762:+	DYNC2H1	circBase	554	4	8941	chr11:103158334-103173821|chr11:103182762-103187273	ENSG00000187240.13_2	ENST00000375735.6_1	NM_001080463	Nhek, diencephalon, cerebellum, occipital_lobe, frontal_cortex, parietal_lobe, temporal_lobe	ANNOTATED, CDS, coding, INTERNAL, OVCODE, OVEXON	Rybak2015, Salzman2013	-3.68538	0.0777304	0.00288889	0.0647629	4.16959	7.85497	127.973	27.4207	185.377	466.517	329.847	47.8455	0	0	0	0
hsa_circ_0024143	chr11:103173821-103194718:+	DYNC2H1	circBase	944	7	20897	chr11:103158334-103173821|chr11:103194718-103228970	ENSG00000187240.13_2	ENST00000375735.6_1	NM_001080463	Hsmm, H1hesc, Bj, Ag04450, A549, Nhek, Sknshra, diencephalon, cerebellum, occipital_lobe, frontal_cortex, parietal_lobe, SY5Y_exp2_D8, temporal_lobe, vena_cava	ANNOTATED, CDS, coding, INTERNAL, OVCODE, OVEXON	Maass2017, Rybak2015, Salzman2013	-0.808066	0.571147	0.329123	0.631349	7.35028	8.15835	287.939	109.683	324.409	358.859	329.847	382.764	63.7494	147.8	75.3892	77.6388
hsa_circ_0024144	chr11:103173821-103229087:+	DYNC2H1	circBase	1061	8	55266	chr11:103158334-103173821|chr11:103229087-103270390	ENSG00000187240.13_2	ENST00000375735.6_1	NM_001080463	Bj, A549, Sknshra, diencephalon, Sy5y_exp1_D4, cerebellum, occipital_lobe, frontal_cortex, parietal_lobe, temporal_lobe, vena_cava, muscle	ANNOTATED, CDS, coding, INTERNAL, OVCODE, OVEXON	Maass2017, Rybak2015, Salzman2013	-0.983086	0.505896	0.314785	0.620889	6.75742	7.74051	127.973	246.786	231.721	179.43	256.548	95.691	254.998	147.8	0	0
hsa_circ_0008602	chr11:106849344-106856857:-	GUCY1A2	circBase	184	2	7513	chr11:106810904-106849344|chr11:106856857-106888478	ENSG00000152402.10_3	ENST00000526355.6_1	NM_000855	Hs68_RNase, Hs68_control, H1hesc, Gm12878, Bj, A549, Sknshra, diencephalon, cerebellum, occipital_lobe, frontal_cortex, parietal_lobe, temporal_lobe, adipose, decidua, VSMC, right_atrium, umbilical_cord	ANNOTATED, CDS, coding, INTERNAL, OVCODE, OVEXON	Jeck2013, Maass2017, Rybak2015, Salzman2013	0.350906	1.27536	0.590198	0.82085	9.56984	9.21893	479.898	548.414	509.786	753.605	659.694	478.455	509.995	443.399	1055.45	1319.86
hsa_circ_0006868	chr11:107260799-107289013:-	CWF19L2	circBase	439	4	28214	chr11:107224462-107260799|chr11:107289013-107299524	ENSG00000152404.15_3	ENST00000282251.9_1	NM_152434	Hs68_RNase, Hs68_control, diencephalon, cerebellum, Sy5y_exp1_D0, occipital_lobe, frontal_cortex, Sy5y_exp1_D2, parietal_lobe, temporal_lobe, chondrocytes, platelets	ANNOTATED, CDS, coding, INTERNAL, OVCODE, OVEXON	Jeck2013, Maass2017, Rybak2015	-1.06462	0.478099	0.220528	0.545347	6.80024	7.86486	223.953	219.366	185.377	322.973	183.248	95.691	63.7494	147.8	226.168	0
hsa_circ_0024169	chr11:107916996-107925682:+	CUL5	circBase	646	5	8686	chr11:107904637-107916996|chr11:107925682-107940822	ENSG00000166266.13_2	ENST00000393094.6_1	NM_003478	K562, Bj, Ag04450, Nhek, Sknshra, diencephalon, cerebellum, Sy5y_exp1_D0, occipital_lobe, frontal_cortex, parietal_lobe, SY5Y_exp2_D8, temporal_lobe, adipose, vena_cava, platelets	ANNOTATED, CDS, coding, INTERNAL, OVCODE, OVEXON	Maass2017, Rybak2015, Salzman2013	-0.564296	0.676285	0.509574	0.770055	7.88001	8.44431	415.912	219.366	92.6884	574.175	403.147	287.073	318.747	147.8	301.557	77.6388
hsa_circ_0005580	chr11:107965117-107966418:+	CUL5	circBase	462	3	1301	chr11:107960350-107965117|chr11:107966418-107968362	ENSG00000166266.13_2	ENST00000393094.6_1	NM_003478	Hs68_RNase, Hs68_control, K562, Huvec, Hepg2, Bj, diencephalon, cerebellum, occipital_lobe, frontal_cortex, parietal_lobe, temporal_lobe	ANNOTATED, CDS, coding, INTERNAL, OVCODE, OVEXON	Jeck2013, Rybak2015, Salzman2013	0.650278	1.56947	0.476435	0.749637	7.53213	6.88185	127.973	54.8414	92.6884	215.316	73.2994	239.227	191.248	147.8	150.778	155.278
hsa_circ_0006208	chr11:108046972-108047817:-	NPAT	circBase	226	2	845	chr11:108044578-108046972|chr11:108047817-108055958	ENSG00000149308.16_2	ENST00000278612.8_1	NM_002519	Hs68_RNase, Hs68_control, K562, H1hesc, Gm12878, Ag04450, SY5Y_exp2_D0, diencephalon, Sy5y_exp1_D4, cerebellum, Sy5y_exp1_D0, occipital_lobe, frontal_cortex, Sy5y_exp1_D2, parietal_lobe, SY5Y_exp2_D8, temporal_lobe, chondrocytes, WAS2, ada_scid, adipose, vena_cava, right_atrium, neutophils, platelets	ANNOTATED, CDS, coding, INTERNAL, OVCODE, OVEXON	Jeck2013, Maass2017, Rybak2015, Salzman2013	0.525651	1.43958	0.50999	0.770055	8.99666	8.47101	351.926	520.994	92.6884	322.973	439.796	621.991	764.993	738.999	376.946	0
hsa_circ_0007694	chr11:108137897-108138069:+	ATM	circBase	172	1	172	chr11:108129802-108137897|chr11:108138069-108139136	ENSG00000149311.18_2	ENST00000527805.5_1	NM_000051	Hs68_RNase, Hs68_control, K562, Gm12878, Bj, Ag04450, A549, Sknshra, diencephalon, cerebellum, Sy5y_exp1_D0, occipital_lobe, frontal_cortex, Sy5y_exp1_D2, parietal_lobe, temporal_lobe, SY5Y_exp2_D4, platelets	ANNOTATED, CDS, coding, INTERNAL, OVCODE, OVEXON	Jeck2013, Maass2017, Rybak2015, Salzman2013	2.2501	4.75714	0.0469226	0.267156	7.78699	5.53689	63.9865	54.8414	46.3442	35.8859	0	47.8455	509.995	295.599	226.168	0
hsa_circ_0005583	chr11:108172374-108175579:+	ATM	circBase	497	3	3205	chr11:108170612-108172374|chr11:108175579-108178623	ENSG00000149311.18_2	ENST00000278616.8_1	NM_000051	Hs68_RNase, Hs68_control, Helas3, H1hesc, Bj, A549, diencephalon, cerebellum, occipital_lobe, frontal_cortex, parietal_lobe, temporal_lobe, platelets	ANNOTATED, CDS, coding, INTERNAL, OVCODE, OVEXON	Jeck2013, Maass2017, Rybak2015, Salzman2013	0.499702	1.41392	0.607178	0.83213	7.46513	6.96543	223.953	82.2622	185.377	35.8859	73.2994	0	127.499	147.8	301.557	310.555
hsa_circ_0024234	chr11:108199747-108202764:+	ATM	circBase	699	4	3017	chr11:108198485-108199747|chr11:108202764-108203488	ENSG00000149311.18_2	ENST00000278616.8_1	NM_000051	K562, cerebellum, occipital_lobe, frontal_cortex, parietal_lobe, temporal_lobe	ANNOTATED, CDS, coding, INTERNAL, OVCODE, OVERLAPTX, OVEXON	Rybak2015, Salzman2013	1.58449	2.99901	0.235521	0.560657	7.61582	6.03134	0	109.683	0	0	183.248	0	509.995	295.599	150.778	0
hsa_circ_0003541	chr11:110007387-110030215:+	ZC3H12C	circBase	1127	3	22828	chr11:109964158-110007387|chr11:110030215-110033997	ENSG00000149289.10_2	ENST00000278590.7_1	NM_033390	Hs68_RNase, Hs68_control, K562, Huvec, Helas3, Gm12878, A549, Sknshra, diencephalon, cerebellum, occipital_lobe, frontal_cortex, parietal_lobe, temporal_lobe, WAS2, ada_scid, LCL	ANNOTATED, CDS, coding, INTERNAL, OVCODE, OVEXON	Jeck2013, Maass2017, Rybak2015, Salzman2013	0.47281	1.38781	0.667552	0.86876	7.55232	7.07951	0	54.8414	92.6884	358.859	146.599	0	254.998	369.499	301.557	0
hsa_circ_0095062	chr11:115085327-115111140:-	CADM1	circBase	870	6	25813	chr11:115080377-115085327|chr11:115111140-115374988	ENSG00000182985.17_3	ENST00000452722.7_1	NM_014333	diencephalon, cerebellum, occipital_lobe, frontal_cortex, parietal_lobe, temporal_lobe	ANNOTATED, CDS, coding, INTERNAL, OVCODE, OVEXON	Rybak2015	-1.72444	0.302617	0.0982592	0.37471	7.07381	8.79824	895.81	987.146	0	215.316	73.2994	191.382	0	295.599	0	155.278
hsa_circ_0007827	chr11:117023156-117034608:+	PAFAH1B2	circBase	418	4	11452	chr11:117015134-117023156|chr11:117034608-117038136	ENSG00000168092.13_2	ENST00000527958.5_1	NM_002572	Hs68_RNase, Hs68_control, K562, Huvec, Helas3, H1hesc, Gm12878, Bj, Ag04450, A549, Nhek, Sknshra, SY5Y_exp2_D0, diencephalon, Sy5y_exp1_D4, cerebellum, Sy5y_exp1_D0, occipital_lobe, frontal_cortex, Sy5y_exp1_D2, parietal_lobe, temporal_lobe, SY5Y_exp2_D4, platelets	ANNOTATED, CDS, coding, INTERNAL, OVCODE, OVEXON, UTR5	Jeck2013, Maass2017, Rybak2015, Salzman2013	-1.37184	0.386398	0.109866	0.393444	6.78703	8.15887	191.959	329.049	185.377	358.859	329.847	95.691	127.499	147.8	150.778	0
hsa_circ_0002743	chr11:117150623-117150975:+	RNF214	circBase	186	2	352	chr11:117117664-117150623|chr11:117150975-117152029	ENSG00000167257.10_3	ENST00000300650.8_2	NM_001077239	Hs68_RNase, Hs68_control, K562, Sknshra, diencephalon, cerebellum, Sy5y_exp1_D0, occipital_lobe, frontal_cortex, parietal_lobe, temporal_lobe, platelets	ANNOTATED, CDS, coding, INTERNAL, OVCODE, OVEXON	Jeck2013, Maass2017, Rybak2015, Salzman2013	-0.633774	0.644488	0.426115	0.712122	7.96257	8.59634	255.946	658.097	556.13	215.316	219.898	143.536	191.248	295.599	452.335	155.278
hsa_circ_0095113	chr11:118352429-118353210:+	MLL	circBase	452	2	781	chr11:118350953-118352429|chr11:118353210-118354897	ENSG00000118058.20_3	ENST00000534358.5_2	ENST00000534358.1	diencephalon, Sy5y_exp1_D2	ANNOTATED, CDS, coding, INTERNAL, OVCODE, OVEXON	Rybak2015	-1.6734	0.313513	0.0948729	0.370471	6.57072	8.24412	255.946	658.097	231.721	35.8859	293.197	143.536	0	295.599	0	0
hsa_circ_0000359	chr11:118422500-118423050:-	IFT46	circBase	189	2	550	chr11:118416568-118422500|chr11:118423050-118425173	ENSG00000118096.7_2	ENST00000264021.7_1	NM_001168618	cd_19, Hs68_RNase, Hs68_control, K562, Huvec, Bj, Ag04450, A549, Nhek, Sknshra, diencephalon, cerebellum, occipital_lobe, frontal_cortex, parietal_lobe, temporal_lobe	ANNOTATED, CDS, coding, INTERNAL, OVCODE, OVEXON	Jeck2013, Memczak2013, Rybak2015, Salzman2013	1.73554	3.33004	0.122588	0.412007	7.65829	5.92275	63.9865	191.945	0	0	0	0	318.747	221.7	301.557	155.278
hsa_circ_0007372	chr11:118422500-118430579:-	IFT46	circBase	707	7	8079	chr11:118416568-118422500|chr11:118430579-118435679	ENSG00000118096.7_2	ENST00000264021.7_1	NM_020153	Hs68_RNase, Hs68_control, K562, H1hesc, Gm12878, Bj, Ag04450, A549, Nhek, Sknshra, diencephalon, cerebellum, occipital_lobe, frontal_cortex, parietal_lobe, temporal_lobe	ANNOTATED, CDS, coding, INTERNAL, OVCODE, OVEXON, UTR5	Jeck2013, Rybak2015, Salzman2013	0.829577	1.77716	0.302124	0.609426	9.1263	8.29672	223.953	329.049	602.474	0	403.147	334.918	701.244	147.8	1206.23	388.194
hsa_circ_0005589	chr11:118454523-118455359:+	ARCN1	circBase	371	2	836	chr11:118454073-118454523|chr11:118455359-118461055	ENSG00000095139.13_2	ENST00000392859.7_1	NM_001655	Hs68_RNase, Hs68_control, H1hesc, Gm12878, Ag04450, Nhek, Sknshra, diencephalon, cerebellum, occipital_lobe, frontal_cortex, parietal_lobe, temporal_lobe, SY5Y_exp2_D4, neutophils, platelets	ANNOTATED, CDS, coding, INTERNAL, OVCODE, OVEXON	Jeck2013, Maass2017, Rybak2015, Salzman2013	0.883941	1.84541	0.423303	0.70972	7.49408	6.61014	0	82.2622	92.6884	215.316	73.2994	0	0	369.499	376.946	155.278
hsa_circ_0004293	chr11:118656760-118657227:-	DDX6	circBase	467	1	467	chr11:118651893-118656760|chr11:118657227-118661563	ENSG00000110367.11_2	ENST00000620157.4_1	NM_004397	Hs68_RNase, Hs68_control, K562, H1hesc, Gm12878, Bj, Ag04450, Sknshra, diencephalon, Sy5y_exp1_D4, cerebellum, occipital_lobe, frontal_cortex, Sy5y_exp1_D2, parietal_lobe, temporal_lobe, EPC, platelets	ANNOTATED, CDS, coding, INTERNAL, OVCODE, OVEXON, UTR5	Jeck2013, Maass2017, Rybak2015, Salzman2013	0.50594	1.42005	0.570385	0.805654	7.70349	7.19755	191.959	274.207	0	143.544	73.2994	334.918	63.7494	295.599	150.778	155.278
hsa_circ_0095155	chr11:119155678-119156276:+	CBL	circBase	510	2	598	chr11:119149423-119155678|chr11:119156276-119158561	ENSG00000110395.6_3	ENST00000264033.5_1	ENST00000264033.4	SY5Y_exp2_D0, diencephalon, cerebellum, occipital_lobe, frontal_cortex, Sy5y_exp1_D2, parietal_lobe, temporal_lobe	ANNOTATED, CDS, coding, INTERNAL, OVCODE, OVEXON	Rybak2015	-1.0968	0.467552	0.123147	0.412105	8.29181	9.38861	1023.78	795.201	556.13	789.49	146.599	382.764	382.497	295.599	75.3892	388.194
hsa_circ_0024604	chr11:120276826-120278532:+	ARHGEF12	circBase	110	2	1706	chr11:120207984-120276826|chr11:120278532-120291461	ENSG00000196914.8_2	ENST00000356641.7_2	NM_015313	K562, Huvec, Hepg2, Helas3, H1hesc, Gm12878, Bj, Ag04450, A549, Nhek, Sknshra, SY5Y_exp2_D0, diencephalon, cerebellum, occipital_lobe, frontal_cortex, Sy5y_exp1_D2, parietal_lobe, HUVEC, chondrocytes, decidua, platelets	ANNOTATED, CDS, coding, INTERNAL, OVCODE, OVERLAPTX, OVEXON	Maass2017, Rybak2015, Salzman2013	2.3966	5.26562	0.00467086	0.0880304	9.00807	6.61146	63.9865	27.4207	46.3442	143.544	183.248	95.691	382.497	1034.6	603.114	465.833
hsa_circ_0024605	chr11:120276826-120280159:+	ARHGEF12	circBase	167	3	3333	chr11:120207984-120276826|chr11:120280159-120291461	ENSG00000196914.8_2	ENST00000397843.6_2	NM_015313	K562, H1hesc, Gm12878, Bj, Ag04450, A549, Nhek, Sknshra	ANNOTATED, CDS, coding, INTERNAL, OVCODE, OVERLAPTX, OVEXON	Salzman2013	0.40638	1.32536	0.610991	0.834698	8.97759	8.57121	319.932	246.786	556.13	143.544	623.045	621.991	127.499	443.399	527.725	776.388
hsa_circ_0024648	chr11:120339996-120348235:+	ARHGEF12	circBase	678	7	8239	chr11:120338017-120339996|chr11:120348235-120348864	ENSG00000196914.8_2	ENST00000356641.7_2	NM_015313	K562, Helas3, Gm12878, diencephalon, cerebellum, occipital_lobe, frontal_cortex, parietal_lobe, temporal_lobe	ANNOTATED, CDS, coding, INTERNAL, OVCODE, OVEXON	Rybak2015, Salzman2013	1.89302	3.71413	0.148127	0.444724	7.46581	5.57278	0	191.945	0	0	0	191.382	127.499	0	150.778	388.194
hsa_circ_0009021	chr11:120343758-120348235:+	ARHGEF12	circBase	577	6	4477	chr11:120340097-120343758|chr11:120348235-120348864	ENSG00000196914.8_2	ENST00000356641.7_2	NM_015313	Hs68_RNase, Hs68_control, K562, Huvec, Hepg2, H1hesc, Gm12878, Bj, Ag04450, A549, Nhek, Sknshra, SY5Y_exp2_D0, diencephalon, Sy5y_exp1_D4, cerebellum, occipital_lobe, frontal_cortex, Sy5y_exp1_D2, parietal_lobe, temporal_lobe, SY5Y_exp2_D4, umbilical_cord, platelets	ANNOTATED, CDS, coding, INTERNAL, OVCODE, OVEXON	Jeck2013, Maass2017, Rybak2015, Salzman2013	-0.158029	0.896249	0.864867	0.969347	8.98526	9.14329	863.817	959.725	0	215.316	732.994	287.073	127.499	517.299	904.671	698.749
hsa_circ_0002100	chr11:120345268-120348235:+	ARHGEF12	circBase	499	5	2967	chr11:120343836-120345268|chr11:120348235-120348864	ENSG00000196914.8_2	ENST00000356641.7_2	NM_015313	Hs68_RNase, Hs68_control, K562, Helas3, H1hesc, Bj, Ag04450, Nhek, diencephalon, cerebellum, Sy5y_exp1_D0, occipital_lobe, frontal_cortex, Sy5y_exp1_D2, parietal_lobe, temporal_lobe, WAS2, vena_cava, right_atrium, muscle, platelets	ANNOTATED, CDS, coding, INTERNAL, OVCODE, OVEXON	Jeck2013, Maass2017, Rybak2015, Salzman2013	-1.00374	0.498705	0.118422	0.409268	9.17709	10.1808	991.79	1727.51	417.098	1076.58	1539.29	717.682	254.998	738.999	376.946	776.388
hsa_circ_0002089	chr11:120347369-120348235:+	ARHGEF12	circBase	255	3	866	chr11:120346216-120347369|chr11:120348235-120348864	ENSG00000196914.8_2	ENST00000356641.7_2	NM_015313	Hs68_RNase, Hs68_control, K562, Gm12878, Bj, Ag04450, Nhek, diencephalon, cerebellum, Sy5y_exp1_D0, occipital_lobe, frontal_cortex, Sy5y_exp1_D2, parietal_lobe, temporal_lobe, vena_cava, platelets	ANNOTATED, CDS, coding, INTERNAL, OVCODE, OVEXON	Jeck2013, Maass2017, Rybak2015, Salzman2013	1.5763	2.98204	0.275191	0.591851	7.37775	5.80145	0	0	0	215.316	36.6497	0	0	443.399	301.557	77.6388
hsa_circ_0003302	chr11:120916382-120930794:+	TBCEL	circBase	973	6	14412	chr11:120894863-120916382|chr11:120930794-120957486	ENSG00000154114.12_3	ENST00000529397.5_1	NM_152715	Hs68_RNase, Hs68_control, K562, Huvec, Hepg2, Helas3, H1hesc, Gm12878, Bj, Ag04450, A549, Nhek, Sknshra, SY5Y_exp2_D0, diencephalon, Sy5y_exp1_D4, cerebellum, occipital_lobe, frontal_cortex, Sy5y_exp1_D2, parietal_lobe, temporal_lobe, WAS2, ada_scid, adipose, right_atrium, platelets	ANNOTATED, CDS, coding, INTERNAL, OVCODE, OVEXON, UTR5	Jeck2013, Maass2017, Rybak2015, Salzman2013	0.525369	1.4393	0.485544	0.755772	9.52941	9.00404	255.946	438.731	695.163	574.175	586.395	669.837	1593.74	73.8999	150.778	1164.58
hsa_circ_0095256	chr11:122827203-122828199:+	C11orf63	circBase	210	2	996	chr11:122817500-122827203|chr11:122828199-122829955	ENSG00000109944.10_2	ENST00000227349.6_2	NM_024806	diencephalon, cerebellum, occipital_lobe, frontal_cortex, parietal_lobe, temporal_lobe	ANNOTATED, CDS, coding, INTERNAL, OVCODE, OVEXON	Rybak2015	-0.90691	0.533326	0.447383	0.727238	6.51411	7.42102	191.959	191.945	0	287.087	146.599	0	0	147.8	75.3892	232.916
hsa_circ_0000367	chr11:124517260-124518071:-	SIAE	circBase	244	2	811	chr11:124509763-124517260|chr11:124518071-124519514	ENSG00000110013.12_2	ENST00000263593.7_1	NM_001199922	cd_19, cd_34, Hepg2, A549, diencephalon, cerebellum, occipital_lobe, frontal_cortex, parietal_lobe, temporal_lobe, platelets	ANNOTATED, CDS, coding, INTERNAL	Maass2017, Memczak2013, Rybak2015, Salzman2013	0.0631543	1.04475	1	1	7.38821	7.32506	159.966	219.366	92.6884	143.544	146.599	95.691	127.499	221.7	226.168	155.278
hsa_circ_0095276	chr11:125104940-125109624:+	PKNOX2	circBase	184	2	4684	chr11:125034672-125104940|chr11:125109624-125201714	ENSG00000165495.15_3	ENST00000527238.5_1	NM_022062	diencephalon, cerebellum, occipital_lobe, frontal_cortex, parietal_lobe	ALT_DONOR, coding, INTERNAL, intronic, OVEXON, UTR5	Rybak2015	0.866339	1.82303	0.410483	0.703296	9.1823	8.31596	0	301.628	370.753	897.148	0	478.455	0	517.299	1583.17	310.555
hsa_circ_0095328	chr11:12785725-12785981:+	TEAD1	circBase	256	1	256	chr11:12697108-12785725|chr11:12785981-12883796	ENSG00000187079.16_3	ENST00000527636.5_3	ENST00000361905.4	diencephalon, cerebellum, Sy5y_exp1_D0, occipital_lobe, frontal_cortex, parietal_lobe, temporal_lobe	ANNOTATED, CDS, coding, INTERNAL, OVCODE, OVERLAPTX, OVEXON, UTR5	Rybak2015	1.06278	2.08896	0.420864	0.70841	7.46037	6.39758	319.932	27.4207	0	35.8859	0	95.691	382.497	295.599	75.3892	0
hsa_circ_0024843	chr11:128963515-129034322:-	ARHGAP32	circBase	373	4	70807	chr11:128936763-128963515|chr11:129034322-129061977	ENSG00000134909.18_2	ENST00000310343.13_1	NM_001142685	Nhek, diencephalon, cerebellum, occipital_lobe, frontal_cortex, parietal_lobe, temporal_lobe, cortex, platelets	ANNOTATED, CDS, coding, INTERNAL, OVCODE, OVEXON	Maass2017, Rybak2015, Salzman2013	-0.781439	0.581786	0.525067	0.778561	8.59525	9.37669	31.9932	0	695.163	1184.24	1392.69	1004.76	573.745	295.599	0	0
hsa_circ_0000371	chr11:128993340-128994789:-	ARHGAP32	circBase	177	2	1449	chr11:128963602-128993340|chr11:128994789-129034213	ENSG00000134909.18_2	ENST00000310343.13_1	NM_001142685	cd_19, Hs68_RNase, Hs68_control, H1hesc, Mcf7, diencephalon, cerebellum, Sy5y_exp1_D0, occipital_lobe, frontal_cortex, parietal_lobe, temporal_lobe, cortex, platelets	ANNOTATED, CDS, coding, INTERNAL, OVCODE, OVEXON	Jeck2013, Maass2017, Memczak2013, Rybak2015, Salzman2013	-0.501839	0.706206	0.64135	0.850009	7.71012	8.21196	0	0	417.098	610.061	439.796	765.528	127.499	0	0	77.6388
hsa_circ_0007843	chr11:128993340-129034322:-	ARHGAP32	circBase	286	3	40982	chr11:128963602-128993340|chr11:129034322-129061977	ENSG00000134909.18_2	ENST00000310343.13_1	NM_001142685	Hs68_RNase, Hs68_control, H1hesc, A549, Nhek, diencephalon, cerebellum, occipital_lobe, frontal_cortex, parietal_lobe, temporal_lobe, right_atrium, platelets	ANNOTATED, CDS, coding, INTERNAL, OVCODE, OVEXON	Jeck2013, Maass2017, Rybak2015, Salzman2013	-1.27706	0.412636	0.264121	0.584873	8.93157	10.2086	351.926	54.8414	1204.95	1866.07	2418.88	1770.28	446.246	147.8	0	0
hsa_circ_0002484	chr11:130130750-130131824:-	ZBTB44	circBase	1074	1	1074	chr11:130109791-130130750|chr11:130131824-130184269	ENSG00000196323.12_3	ENST00000445008.6_1	NM_014155	Hs68_RNase, Hs68_control, K562, Huvec, Hepg2, Helas3, H1hesc, Gm12878, Bj, Ag04450, A549, Nhek, Sknshra, SY5Y_exp2_D0, diencephalon, Sy5y_exp1_D4, cerebellum, Sy5y_exp1_D0, occipital_lobe, frontal_cortex, Sy5y_exp1_D2, parietal_lobe, temporal_lobe, SY5Y_exp2_D4, WAS2, cortex, adipose, VSMC, vena_cava, muscle, LCL, platelets	ANNOTATED, CDS, coding, INTERNAL, OVCODE, OVEXON, UTR5	Jeck2013, Maass2017, Rybak2015, Salzman2013	-0.813637	0.568946	0.18455	0.504776	9.59096	10.4046	1887.6	1727.51	1158.6	825.376	1136.14	1148.29	318.747	886.798	603.114	854.026
hsa_circ_0008967	chr11:13435076-13443385:-	BTBD10	circBase	707	4	8309	chr11:13427403-13435076|chr11:13443385-13466570	ENSG00000148925.10_3	ENST00000278174.9_1	NM_032320	Hs68_RNase, Hs68_control, K562, Huvec, Hepg2, Helas3, H1hesc, Gm12878, Bj, Ag04450, A549, Nhek, Sknshra, Mcf7, SY5Y_exp2_D0, diencephalon, Sy5y_exp1_D4, cerebellum, Sy5y_exp1_D0, occipital_lobe, frontal_cortex, parietal_lobe, temporal_lobe, SY5Y_exp2_D4, adipose, vena_cava, right_atrium, MSC_047, platelets	ANNOTATED, CDS, coding, INTERNAL, OVCODE, OVEXON	Jeck2013, Maass2017, Rybak2015, Salzman2013	-0.417494	0.748724	0.597035	0.825679	9.24797	9.66546	1055.78	658.097	602.474	466.517	1246.09	95.691	382.497	147.8	1733.95	698.749
hsa_circ_0003234	chr11:13435076-13466728:-	BTBD10	circBase	865	5	31652	chr11:13427403-13435076|chr11:13466728-13484638	ENSG00000148925.10_3	ENST00000278174.9_1	NM_032320	Hs68_RNase, Hs68_control, K562, Hepg2, Gm12878, Bj, Ag04450, A549, Nhek, Sknshra, diencephalon, cerebellum, occipital_lobe, frontal_cortex, parietal_lobe, temporal_lobe, vena_cava, platelets	ANNOTATED, CDS, coding, INTERNAL, OVCODE, OVEXON, UTR5	Jeck2013, Maass2017, Rybak2015, Salzman2013	-1.49429	0.354955	0.0267583	0.195722	8.00801	9.50231	1055.78	712.939	324.409	645.947	842.943	382.764	318.747	221.7	150.778	155.278
hsa_circ_0095442	chr11:16068059-16077447:-	SOX6	circBase	522	3	9388	chr11:16036596-16068059|chr11:16077447-16117541	ENSG00000110693.17_3	ENST00000316399.10_1	NM_017508	diencephalon, cerebellum, occipital_lobe, frontal_cortex, parietal_lobe, temporal_lobe	ANNOTATED, CDS, coding, INTERNAL, OVCODE, OVEXON	Rybak2015	2.95417	7.74984	0.000647223	0.0309468	9.54452	6.59035	0	0	185.377	35.8859	256.548	287.073	1083.74	369.499	1130.84	854.026
hsa_circ_0095444	chr11:16117541-16133469:-	SOX6	circBase	324	3	15928	chr11:16077447-16117541|chr11:16133469-16205431	ENSG00000110693.17_3	ENST00000316399.10_1	ENST00000352083.6	diencephalon, cerebellum, occipital_lobe, frontal_cortex, parietal_lobe, temporal_lobe	ANNOTATED, CDS, coding, INTERNAL, OVCODE, OVERLAPTX, OVEXON	Rybak2015	2.72905	6.63021	0.0655019	0.314946	6.91915	4.1901	0	54.8414	0	0	0	0	63.7494	0	376.946	155.278
hsa_circ_0095446	chr11:16117541-16208501:-	SOX6	circBase	566	5	90960	chr11:16077447-16117541|chr11:16208501-16256127	ENSG00000110693.17_3	ENST00000316399.10_1	ENST00000352083.6	diencephalon, cerebellum, occipital_lobe, frontal_cortex, parietal_lobe, temporal_lobe	ANNOTATED, CDS, coding, INTERNAL, OVCODE, OVERLAPTX, OVEXON	Rybak2015	3.84075	14.3279	0.00458625	0.0878611	8.14872	4.30797	0	0	0	71.7719	0	191.382	446.246	0	753.892	0
hsa_circ_0021347	chr11:16119154-16208501:-	SOX6	circBase	443	4	89347	chr11:16117664-16119154|chr11:16208501-16256127	ENSG00000110693.17_3	ENST00000316399.10_1	NM_017508	Helas3, Ag04450, diencephalon, cerebellum, occipital_lobe, frontal_cortex, parietal_lobe, temporal_lobe	ANNOTATED, CDS, coding, INTERNAL, OVCODE, OVERLAPTX, OVEXON	Rybak2015, Salzman2013	2.67804	6.39987	0.0265276	0.195722	7.6869	5.00886	0	54.8414	0	71.7719	0	47.8455	573.745	0	226.168	155.278
hsa_circ_0021350	chr11:16205431-16208501:-	SOX6	circBase	242	2	3070	chr11:16133469-16205431|chr11:16208501-16256127	ENSG00000110693.17_3	ENST00000316399.10_1	NM_017508	K562, diencephalon, cerebellum, occipital_lobe, frontal_cortex, parietal_lobe, temporal_lobe	ANNOTATED, CDS, coding, INTERNAL, OVCODE, OVERLAPTX, OVEXON	Rybak2015, Salzman2013	4.61117	24.44	0.00267732	0.0639373	8.28264	3.67147	0	0	0	0	36.6497	0	1147.49	147.8	75.3892	155.278
chr11:16205431-16362798:-	chr11:16205431-16362798:-	SOX6	CIRCexplorer2	781	5	157367	chr11:16133469-16205431|chr11:16362798-16497861	ENSG00000110693.17_3	ENST00000396356.7_1	NA	NA	NA	NA	2.07069	4.20087	0.17498	0.489682	7.49637	5.42568	0	0	46.3442	0	146.599	0	573.745	0	301.557	0
hsa_circ_0095454	chr11:16339991-16362798:-	SOX6	circBase	449	2	22807	chr11:16256217-16339991|chr11:16362798-16497861	ENSG00000110693.17_3	ENST00000396356.7_1	NM_017508	diencephalon, cerebellum, occipital_lobe, frontal_cortex, parietal_lobe, temporal_lobe	ANNOTATED, CDS, coding, INTERNAL, OVCODE, OVERLAPTX, OVEXON	Rybak2015	2.30084	4.92744	0.0057396	0.0975717	9.04174	6.7409	63.9865	0	92.6884	287.087	73.2994	382.764	1083.74	369.499	452.335	310.555
chr11:16339991-16497935:-	chr11:16339991-16497935:-	SOX6	CIRCexplorer2	523	3	157944	chr11:16305464-16339991|chr11:16497935-16633627	ENSG00000110693.17_3	ENST00000530378.5_1	NA	NA	NA	NA	2.52876	5.77074	0.044249	0.257903	7.90469	5.37593	0	0	0	35.8859	146.599	382.764	382.497	0	75.3892	310.555
hsa_circ_0002443	chr11:17167214-17167489:-	PIK3C2A	circBase	144	2	275	chr11:17158172-17167214|chr11:17167489-17169063	ENSG00000011405.13_3	ENST00000265970.11_1	NM_002645	Hs68_RNase, Hs68_control, K562, H1hesc, Gm12878, Bj, Nhek, diencephalon, cerebellum, occipital_lobe, frontal_cortex, parietal_lobe, temporal_lobe	ANNOTATED, CDS, coding, INTERNAL, OVCODE, OVEXON	Jeck2013, Rybak2015, Salzman2013	-2.0237	0.245927	0.0337598	0.219534	6.61494	8.63864	703.851	850.042	92.6884	143.544	146.599	95.691	63.7494	0	150.778	155.278
hsa_circ_0021412	chr11:18010143-18029623:-	SERGEF	circBase	863	8	19480	chr11:17899791-18010143|chr11:18029623-18034397	ENSG00000129158.10_3	ENST00000527494.5_1	NM_012139	K562, Nhek, diencephalon, cerebellum, occipital_lobe, frontal_cortex, parietal_lobe, temporal_lobe, WAS2	ANNOTATED, CDS, coding, INTERNAL, OVCODE, OVEXON	Maass2017, Rybak2015, Salzman2013	-2.91097	0.132957	0.0019144	0.0531504	5.7139	8.62486	287.939	137.104	556.13	502.403	476.446	191.382	0	0	0	0
hsa_circ_0000279	chr11:18312988-18313566:-	HPS5	circBase	578	1	578	chr11:18309560-18312988|chr11:18313566-18314445	ENSG00000110756.17_2	ENST00000396253.7_1	NM_181508	cd_34, Hs68_RNase, Hs68_control, K562, Hsmm, Hepg2, Gm12878, A549, Nhek, Sknshra, diencephalon, cerebellum, Sy5y_exp1_D0, occipital_lobe, frontal_cortex, parietal_lobe, temporal_lobe, LCL	ANNOTATED, CDS, coding, INTERNAL, OVCODE, OVEXON	Jeck2013, Maass2017, Memczak2013, Rybak2015, Salzman2013	1.65317	3.14523	0.11454	0.401278	8.19416	6.541	127.973	82.2622	0	35.8859	183.248	95.691	0	295.599	301.557	776.388
hsa_circ_0000280	chr11:18312988-18314523:-	HPS5	circBase	656	2	1535	chr11:18309560-18312988|chr11:18314523-18316566	ENSG00000110756.17_2	ENST00000396253.7_1	NM_181508	neutr, Hs68_RNase, Hs68_control, K562, Hsmm, Helas3, H1hesc, Gm12878, Bj, Ag04450, A549, Nhek, Sknshra, diencephalon, Sy5y_exp1_D4, cerebellum, Sy5y_exp1_D0, occipital_lobe, frontal_cortex, Sy5y_exp1_D2, parietal_lobe, SY5Y_exp2_D8, temporal_lobe, WAS2, ada_scid, decidua, vena_cava, LCL, HUAEC, placenta	ANNOTATED, CDS, coding, INTERNAL, OVCODE, OVEXON	Jeck2013, Maass2017, Memczak2013, Rybak2015, Salzman2013	0.436404	1.35323	0.491527	0.759045	9.64751	9.21111	895.81	438.731	509.786	538.289	549.745	287.073	701.244	738.999	980.06	1319.86
hsa_circ_0095626	chr11:22696395-22777499:+	GAS2	circBase	743	6	81104	chr11:22688445-22696395|chr11:22777499-22833343	ENSG00000148935.10_3	ENST00000454584.6_1	ENST00000454584.2	diencephalon, cerebellum, occipital_lobe, frontal_cortex, parietal_lobe, temporal_lobe, SY5Y_exp2_D4	ANNOTATED, CDS, coding, INTERNAL, OVCODE, OVEXON, UTR5	Rybak2015	-2.56433	0.169067	0.0153072	0.156218	5.95116	8.5155	127.973	0	602.474	538.289	549.745	239.227	0	0	0	0
hsa_circ_0095637	chr11:24927536-25004839:+	LUZP2	circBase	369	4	77303	chr11:24784854-24927536|chr11:25004839-25071583	ENSG00000187398.11_4	ENST00000336930.10_2	NM_001009909	diencephalon, cerebellum, occipital_lobe, frontal_cortex, parietal_lobe, temporal_lobe	ANNOTATED, CDS, coding, INTERNAL, OVCODE, OVEXON	Rybak2015	4.0051	16.0566	0.0015557	0.0472566	8.26983	4.26473	63.9865	0	0	0	0	287.073	828.743	0	150.778	232.916
hsa_circ_0021570	chr11:32948702-32956981:+	QSER1	circBase	3968	3	8279	chr11:32914880-32948702|chr11:32956981-32975402	ENSG00000060749.14_2	ENST00000399302.6_2	NM_001076786	K562, Hepg2, H1hesc, Gm12878, Bj, Ag04450, Sknshra, SY5Y_exp2_D0, diencephalon, Sy5y_exp1_D4, cerebellum, Sy5y_exp1_D0, occipital_lobe, frontal_cortex, Sy5y_exp1_D2, parietal_lobe, SY5Y_exp2_D8, temporal_lobe, SY5Y_exp2_D4, WAS2	ANNOTATED, CDS, coding, INTERNAL, OVCODE, OVERLAPTX, OVEXON, UTR5	Maass2017, Rybak2015, Salzman2013	-0.888895	0.540028	0.182656	0.500657	9.21452	10.1034	991.79	2413.02	880.539	574.175	586.395	1004.76	828.743	295.599	301.557	465.833
hsa_circ_0000283	chr11:33127112-33127610:-	CSTF3	circBase	229	3	498	chr11:33124730-33127112|chr11:33127610-33129448	ENSG00000176102.11_2	ENST00000323959.8_1	NM_001326	cd_19, Hs68_RNase, Hs68_control, diencephalon, cerebellum, Sy5y_exp1_D0, occipital_lobe, frontal_cortex, Sy5y_exp1_D2, parietal_lobe, SY5Y_exp2_D8, temporal_lobe, WAS2, platelets	ANNOTATED, CDS, coding, INTERNAL, OVCODE, OVEXON	Jeck2013, Maass2017, Memczak2013, Rybak2015	-0.176089	0.885099	0.893072	0.985051	7.98815	8.16423	383.919	356.469	185.377	358.859	109.949	143.536	637.494	221.7	75.3892	155.278
hsa_circ_0000284	chr11:33307958-33309057:+	HIPK3	circBase	1099	1	1099	chr11:33278298-33307958|chr11:33309057-33350055	ENSG00000110422.11_3	ENST00000525975.5_1	NM_005734	HEK293, cd_19, cd_34, neutr, Hs68_RNase, Hs68_control, K562, Huvec, Hsmm, Hepg2, Helas3, H1hesc, Gm12878, Bj, Ag04450, A549, Nhek, Nhlf, Sknshra, Mcf7, SY5Y_exp2_D0, diencephalon, Sy5y_exp1_D4, cerebellum, Sy5y_exp1_D0, occipital_lobe, frontal_cortex, Sy5y_exp1_D2, parietal_lobe, SY5Y_exp2_D8, temporal_lobe, SY5Y_exp2_D4, EPC, chondrocytes, WAS2, ada_scid, cortex, osteocytes, adipose, decidua, VS…	ANNOTATED, CDS, coding, INTERNAL, OVCODE, OVEXON, UTR5	Jeck2013, Maass2017, Memczak2013, Rybak2015, Salzman2013	-0.422089	0.746343	0.440437	0.722956	12.6422	13.0643	10589.8	9597.25	4866.14	9115.03	8612.68	6746.21	5609.95	6946.59	5955.75	6676.93
hsa_circ_0021609	chr11:33572585-33573787:+	C11orf41	circBase	354	2	1202	chr11:33569425-33572585|chr11:33573787-33581294	ENSG00000110427.14_3	ENST00000526400.5_3	NM_012194	Huvec, H1hesc, Bj, Ag04450, A549, Sknshra, diencephalon, cerebellum, occipital_lobe, frontal_cortex, parietal_lobe, temporal_lobe, WAS2	ANNOTATED, CDS, coding, INTERNAL, OVCODE, OVEXON	Maass2017, Rybak2015, Salzman2013	0.776463	1.71293	0.404366	0.70025	7.74344	6.96698	127.973	109.683	185.377	143.544	36.6497	239.227	127.499	443.399	75.3892	155.278
hsa_circ_0005974	chr11:34093272-34098189:+	CAPRIN1	circBase	472	4	4917	chr11:34074183-34093272|chr11:34098189-34101174	ENSG00000135387.20_3	ENST00000341394.8_1	NM_005898	Hs68_RNase, Hs68_control, K562, Hepg2, Helas3, Gm12878, Bj, Ag04450, A549, Nhek, Sknshra, diencephalon, Sy5y_exp1_D4, cerebellum, Sy5y_exp1_D0, occipital_lobe, frontal_cortex, Sy5y_exp1_D2, parietal_lobe, temporal_lobe, SY5Y_exp2_D4, WAS2, LCL, platelets	ANNOTATED, CDS, coding, INTERNAL, OVCODE, OVEXON	Jeck2013, Maass2017, Rybak2015, Salzman2013	-0.288596	0.818698	0.790764	0.939338	8.14345	8.43204	543.885	603.256	92.6884	71.7719	366.497	0	573.745	443.399	75.3892	310.555
hsa_circ_0000287	chr11:34107610-34113603:+	CAPRIN1	circBase	739	6	5993	chr11:34104588-34107610|chr11:34113603-34118025	ENSG00000135387.20_3	ENST00000341394.8_1	NM_005898	cd_34, K562, Hepg2, diencephalon, cerebellum, occipital_lobe, frontal_cortex, parietal_lobe, temporal_lobe	ANNOTATED, CDS, coding, INTERNAL	Memczak2013, Rybak2015, Salzman2013	0.563662	1.47802	0.566647	0.804178	7.43029	6.86663	63.9865	137.104	139.033	143.544	73.2994	239.227	127.499	0	226.168	232.916
hsa_circ_0004851	chr11:34111725-34113603:+	CAPRIN1	circBase	412	3	1878	chr11:34111003-34111725|chr11:34113603-34118025	ENSG00000135387.20_3	ENST00000341394.8_1	NM_005898	Hs68_RNase, Hs68_control, K562, Hepg2, H1hesc, Gm12878, Ag04450, diencephalon, cerebellum, occipital_lobe, frontal_cortex, parietal_lobe, temporal_lobe, SY5Y_exp2_D4, platelets	ANNOTATED, CDS, coding, INTERNAL, OVCODE, OVEXON	Jeck2013, Maass2017, Rybak2015, Salzman2013	-0.0671701	0.954508	1	1	8.09075	8.15792	447.905	411.311	46.3442	287.087	183.248	239.227	127.499	369.499	376.946	232.916
hsa_circ_0021712	chr11:34978930-34999729:+	PDHX	circBase	681	5	20799	chr11:34969153-34978930|chr11:34999729-35006116	ENSG00000110435.11_2	ENST00000448838.7_1	NM_003477	K562, Hepg2, Helas3, H1hesc, Gm12878, Bj, Ag04450, A549, Nhek, Sknshra, diencephalon, Sy5y_exp1_D4, cerebellum, Sy5y_exp1_D0, occipital_lobe, frontal_cortex, Sy5y_exp1_D2, parietal_lobe, SY5Y_exp2_D8, temporal_lobe, SY5Y_exp2_D4, adipose, LCL, platelets	ANNOTATED, CDS, coding, INTERNAL, OVCODE, OVEXON	Maass2017, Rybak2015, Salzman2013	-0.114305	0.923828	0.959528	1	8.51609	8.6304	415.912	685.518	139.033	287.087	403.147	95.691	382.497	443.399	753.892	155.278
hsa_circ_0006988	chr11:36248634-36248980:+	LDLRAD3	circBase	346	1	346	chr11:36123581-36248634|chr11:36248980-36250709	ENSG00000179241.12_3	ENST00000524419.5_1	NM_174902	Hs68_RNase, Hs68_control, K562, Huvec, Hsmm, Hepg2, Helas3, H1hesc, Gm12878, Bj, Ag04450, A549, Nhek, Nhlf, Sknshra, Mcf7, diencephalon, Sy5y_exp1_D4, cerebellum, Sy5y_exp1_D0, occipital_lobe, frontal_cortex, parietal_lobe, temporal_lobe, adipose	ANNOTATED, CDS, coding, INTERNAL, OVCODE, OVEXON	Jeck2013, Maass2017, Rybak2015, Salzman2013	2.64699	6.26357	0.000168099	0.0155012	11.7733	9.12633	1183.75	630.676	92.6884	466.517	366.497	813.373	5992.45	2217	4674.13	3804.3
hsa_circ_0004960	chr11:3794861-3797251:-	NUP98	circBase	248	2	2390	chr11:3793158-3794861|chr11:3797251-3800102	ENSG00000110713.15_3	ENST00000324932.11_1	NM_016320	Hs68_RNase, Hs68_control, K562, Hepg2, Helas3, H1hesc, Gm12878, Bj, Ag04450, A549, Nhek, diencephalon, cerebellum, occipital_lobe, frontal_cortex, parietal_lobe, temporal_lobe, platelets	ANNOTATED, CDS, coding, INTERNAL, OVCODE, OVEXON	Jeck2013, Maass2017, Rybak2015, Salzman2013	0.181457	1.13403	1	1	7.17946	6.998	127.973	82.2622	417.098	0	0	95.691	0	0	150.778	465.833
hsa_circ_0095814	chr11:41244346-41244558:-	LRRC4C	circBase	212	1	212	chr11:40955273-41244346|chr11:41244558-41480980	ENSG00000148948.7_3	ENST00000534577.1_1	ENST00000534577.1	diencephalon, cerebellum, occipital_lobe, frontal_cortex	ANNOTATED, INTERNAL, ncRNA, OVEXON	Rybak2015	0.271343	1.20693	0.68249	0.876219	9.97786	9.70652	831.824	795.201	370.753	1004.81	1136.14	1100.45	701.244	221.7	980.06	2018.61
chr11:45986865-46001517:-	chr11:45986865-46001517:-	PHF21A	CIRCexplorer2	843	4	14652	chr11:45975176-45986865|chr11:46001517-46098304	ENSG00000135365.15_3	ENST00000323180.10_1	NA	NA	NA	NA	-0.300961	0.811712	0.742662	0.910952	7.58257	7.88353	159.966	329.049	185.377	215.316	256.548	334.918	191.248	73.8999	301.557	0
hsa_circ_0000296	chr11:46098304-46113774:-	PHF21A	circBase	277	4	15470	chr11:46001517-46098304|chr11:46113774-46142485	ENSG00000135365.15_3	ENST00000323180.10_1	NM_016621	HEK293, cd_19, K562, Hepg2, Helas3, H1hesc, Gm12878, Bj, Ag04450, A549, Sknshra, diencephalon, cerebellum, occipital_lobe, frontal_cortex, parietal_lobe, temporal_lobe, LCL, platelets	ANNOTATED, CDS, coding, INTERNAL, UTR5	Maass2017, Memczak2013, Rybak2015, Salzman2013	-0.736246	0.600299	0.268895	0.587881	10.8089	11.5451	3071.35	2385.6	2641.62	3480.94	3335.12	4688.86	1976.23	1182.4	150.778	854.026
hsa_circ_0095900	chr11:46829580-46842819:-	CKAP5	circBase	1015	7	13239	chr11:46822854-46829580|chr11:46842819-46867770	ENSG00000175216.14_3	ENST00000529230.5_1	ENST00000529230.1	diencephalon, cerebellum, occipital_lobe, frontal_cortex, parietal_lobe, temporal_lobe	ANNOTATED, CDS, coding, INTERNAL, OVCODE, OVEXON, UTR5	Rybak2015	-0.0272746	0.981272	1	1	7.53128	7.55856	223.953	329.049	324.409	35.8859	0	95.691	127.499	147.8	0	543.471
hsa_circ_0000303	chr11:47380394-47397280:-	SPI1	circBase	448	3	16886	chr11:47377097-47380394|chr11:47397280-47399859	ENSG00000066336.11_2	ENST00000378538.7_1	NM_003120	cd_19, neutr, ada_scid	ANNOTATED, CDS, coding, INTERNAL	Maass2017, Memczak2013	1.52361	2.8751	0.286086	0.597248	7.09324	5.56963	63.9865	54.8414	92.6884	0	0	0	0	221.7	452.335	0
hsa_circ_0022025	chr11:47647225-47648679:-	MTCH2	circBase	116	2	1454	chr11:47644328-47647225|chr11:47648679-47650504	ENSG00000109919.9_2	ENST00000302503.7_1	NM_014342	K562, H1hesc, Gm12878, diencephalon, cerebellum, occipital_lobe, frontal_cortex, temporal_lobe	ANNOTATED, CDS, coding, INTERNAL, OVCODE, OVEXON	Rybak2015, Salzman2013	0.260516	1.19791	0.896706	0.987273	6.62473	6.36421	31.9932	54.8414	278.065	35.8859	0	95.691	0	295.599	0	77.6388
hsa_circ_0095935	chr11:47752925-47772842:-	FNBP4	circBase	1371	8	19917	chr11:47746330-47752925|chr11:47772842-47774467	ENSG00000109920.12_3	ENST00000263773.9_1	NM_015308	diencephalon, cerebellum, occipital_lobe, frontal_cortex, parietal_lobe, temporal_lobe	ANNOTATED, CDS, coding, INTERNAL, OVCODE, OVERLAPTX, OVEXON	Rybak2015	-1.77442	0.292311	0.0751585	0.337494	7.32165	9.09607	1407.7	987.146	0	251.202	36.6497	382.764	127.499	0	75.3892	155.278
hsa_circ_0004075	chr11:47774467-47776216:-	FNBP4	circBase	324	2	1749	chr11:47772842-47774467|chr11:47776216-47786821	ENSG00000109920.12_3	ENST00000263773.9_1	NM_015308	Hs68_RNase, Hs68_control, K562, Hepg2, Helas3, H1hesc, Gm12878, Bj, Ag04450, A549, Nhek, Sknshra, diencephalon, cerebellum, Sy5y_exp1_D0, occipital_lobe, frontal_cortex, parietal_lobe, temporal_lobe, adipose, platelets	ANNOTATED, CDS, coding, INTERNAL, OVCODE, OVEXON	Jeck2013, Maass2017, Rybak2015, Salzman2013	-0.495776	0.70918	0.555621	0.795782	7.74528	8.24106	351.926	466.152	139.033	215.316	293.197	191.382	318.747	221.7	75.3892	232.916
hsa_circ_0002904	chr11:58317258-58318705:-	LPXN	circBase	424	3	1447	chr11:58295664-58317258|chr11:58318705-58321327	ENSG00000110031.12_2	ENST00000530561.5_1	NM_004811	Hs68_RNase, Hs68_control, Helas3, Gm12878, diencephalon, cerebellum, occipital_lobe, frontal_cortex, parietal_lobe, temporal_lobe, WAS2, cortex	ANNOTATED, CDS, coding, INTERNAL, OVCODE, OVEXON	Jeck2013, Maass2017, Rybak2015, Salzman2013	-2.22304	0.21419	0.00451562	0.0876641	7.69123	9.91427	895.81	658.097	556.13	1291.89	1392.69	574.146	0	147.8	0	232.916
hsa_circ_0004162	chr11:59426338-59426942:-	PATL1	circBase	299	2	604	chr11:59425197-59426338|chr11:59426942-59434325	ENSG00000166889.13_2	ENST00000300146.9_1	NM_152716	Hs68_RNase, Hs68_control, K562, Hepg2, Helas3, H1hesc, Gm12878, Ag04450, A549, Sknshra, diencephalon, cerebellum, occipital_lobe, frontal_cortex, parietal_lobe, temporal_lobe, platelets	ANNOTATED, CDS, coding, INTERNAL, OVCODE, OVEXON	Jeck2013, Maass2017, Rybak2015, Salzman2013	-0.0984853	0.934013	0.93474	1	8.9372	9.03569	671.858	767.78	602.474	179.43	366.497	239.227	254.998	812.899	452.335	698.749
hsa_circ_0002058	chr11:61133516-61135470:+	TMEM138	circBase	248	2	1954	chr11:61131990-61133516|chr11:61135470-61136068	ENSG00000149483.11_2	ENST00000278826.10_1	NM_016464	Hs68_RNase, Hs68_control, K562, Hepg2, Helas3, H1hesc, Gm12878, Bj, Ag04450, A549, Nhek, Sknshra, SY5Y_exp2_D0, diencephalon, cerebellum, Sy5y_exp1_D0, occipital_lobe, frontal_cortex, Sy5y_exp1_D2, parietal_lobe, temporal_lobe, SY5Y_exp2_D4, ada_scid, HUAEC, platelets	ANNOTATED, CDS, coding, INTERNAL, OVCODE, OVEXON	Jeck2013, Maass2017, Rybak2015, Salzman2013	0.945263	1.92554	0.207922	0.531539	9.38402	8.43876	639.865	548.414	92.6884	143.544	256.548	191.382	956.241	443.399	1357.01	388.194
hsa_circ_0000311	chr11:61205096-61205585:+	SDHAF2	circBase	334	2	489	chr11:61196822-61205096|chr11:61205585-61249253	ENSG00000256591.5_4	ENST00000544025.5_1	NM_017841	cd_34, Hs68_RNase, Hs68_control, K562, Huvec, Hepg2, Helas3, H1hesc, Gm12878, Bj, Ag04450, A549, Nhek, Nhlf, Sknshra, diencephalon, Sy5y_exp1_D4, cerebellum, Sy5y_exp1_D0, occipital_lobe, frontal_cortex, Sy5y_exp1_D2, parietal_lobe, temporal_lobe, WAS2, LCL, platelets	ANNOTATED, CDS, coding, INTERNAL, OVCODE, OVEXON	Jeck2013, Maass2017, Memczak2013, Rybak2015, Salzman2013	2.64235	6.24347	0.0333802	0.219534	7.39171	4.74936	63.9865	0	46.3442	0	0	95.691	127.499	369.499	150.778	77.6388
hsa_circ_0096079	chr11:63472322-63488504:+	RTN3	circBase	2388	2	16182	chr11:63449250-63472322|chr11:63488504-63517462	ENSG00000133318.13_3	ENST00000377819.9_1	ENST00000377819.5	diencephalon, cerebellum, occipital_lobe, frontal_cortex, parietal_lobe, temporal_lobe	ANNOTATED, CDS, coding, INTERNAL, OVCODE, OVEXON	Rybak2015	-3.33401	0.0991659	0.00128704	0.0437256	4.90601	8.24002	287.939	438.731	92.6884	466.517	183.248	95.691	0	0	0	0
hsa_circ_0096106	chr11:64453117-64453419:-	NRXN2	circBase	302	1	302	chr11:64444509-64453117|chr11:64453419-64457876	ENSG00000110076.18_2	ENST00000377551.5_1	NM_015080	diencephalon, cerebellum, Sy5y_exp1_D0, occipital_lobe, frontal_cortex, Sy5y_exp1_D2, parietal_lobe, temporal_lobe	ANNOTATED, CDS, coding, INTERNAL, OVCODE, OVERLAPTX, OVEXON	Rybak2015	-1.6654	0.315256	0.0636024	0.310549	6.83122	8.49662	255.946	712.939	139.033	394.745	256.548	287.073	63.7494	0	0	155.278
hsa_circ_0000330	chr11:66407170-66407594:+	RBM4	circBase	424	1	424	chr11:66384528-66407170|chr11:66407594-66410920	ENSG00000248643.5_3	ENST00000421355.1_3	NM_001198844	cd_19, cd_34, Hs68_RNase, Hs68_control, H1hesc, occipital_lobe, frontal_cortex	ANNOTATED, CDS, coding, INTERNAL, OVCODE, OVEXON, UTR5	Jeck2013, Memczak2013, Rybak2015, Salzman2013	0.109543	1.07889	1	1	7.32251	7.21296	223.953	164.524	139.033	35.8859	146.599	95.691	509.995	0	0	155.278
hsa_circ_0096269	chr11:67934448-67957619:-	SUV420H1	circBase	1250	9	23171	chr11:67926638-67934448|chr11:67957619-67980604	ENSG00000110066.14_3	ENST00000304363.8_2	ENST00000304363.4	diencephalon, cerebellum, occipital_lobe, frontal_cortex, parietal_lobe, temporal_lobe	ANNOTATED, CDS, coding, INTERNAL, OVCODE, OVERLAPTX, OVEXON, UTR5	Rybak2015	-0.418797	0.748048	0.720482	0.896888	7.42884	7.84764	95.9797	520.994	92.6884	143.544	256.548	287.073	0	0	0	543.471
hsa_circ_0008391	chr11:68363564-68370960:+	PPP6R3	circBase	534	4	7396	chr11:68359174-68363564|chr11:68370960-68377371	ENSG00000110075.14_4	ENST00000393800.6_2	NM_001164160	Hs68_RNase, Hs68_control, diencephalon, cerebellum, occipital_lobe, frontal_cortex, parietal_lobe, temporal_lobe	ANNOTATED, CDS, coding, INTERNAL, OVCODE, OVEXON	Jeck2013, Rybak2015	-0.781167	0.581896	0.495218	0.761556	7.08693	7.8681	0	54.8414	185.377	358.859	549.745	191.382	0	0	150.778	310.555
hsa_circ_0000337	chr11:70200406-70202360:+	PPFIA1	circBase	419	3	1954	chr11:70194526-70200406|chr11:70202360-70208200	ENSG00000131626.16_3	ENST00000253925.11_1	NM_177423	cd_19, Hs68_RNase, Hs68_control, K562, Helas3, H1hesc, Gm12878, Bj, Ag04450, A549, diencephalon, cerebellum, occipital_lobe, frontal_cortex, Sy5y_exp1_D2, parietal_lobe, temporal_lobe, platelets	ANNOTATED, CDS, coding, INTERNAL, ncRNA, OVCODE, OVEXON	Jeck2013, Maass2017, Memczak2013, Rybak2015, Salzman2013	2.51743	5.72561	0.0203031	0.175326	8.18924	5.67181	31.9932	109.683	0	0	73.2994	0	828.743	147.8	150.778	310.555
hsa_circ_0007195	chr11:72598514-72600990:-	FCHSD2	circBase	222	2	2476	chr11:72579071-72598514|chr11:72600990-72613587	ENSG00000137478.14_3	ENST00000311172.11_1	NM_014824	Hs68_RNase, Hs68_control, K562, SY5Y_exp2_D0, diencephalon, cerebellum, occipital_lobe, frontal_cortex, parietal_lobe, temporal_lobe, platelets	ANNOTATED, CDS, coding, INTERNAL, OVCODE, OVEXON	Jeck2013, Maass2017, Rybak2015, Salzman2013	-0.457424	0.728286	0.773741	0.928436	6.79673	7.25415	95.9797	0	139.033	287.087	219.898	0	446.246	0	0	77.6388
hsa_circ_0005918	chr11:72695132-72700142:-	FCHSD2	circBase	318	3	5010	chr11:72632995-72695132|chr11:72700142-72712034	ENSG00000137478.14_3	ENST00000311172.11_1	NM_014824	Hs68_RNase, Hs68_control, K562, Huvec, Helas3, Gm12878, Bj, Ag04450, diencephalon, cerebellum, Sy5y_exp1_D0, occipital_lobe, frontal_cortex, Sy5y_exp1_D2, parietal_lobe, temporal_lobe, SY5Y_exp2_D4, WAS2, ada_scid, adipose, vena_cava, platelets	ANNOTATED, CDS, coding, INTERNAL, OVCODE, OVEXON	Jeck2013, Maass2017, Rybak2015, Salzman2013	-0.483898	0.715043	0.498139	0.762868	8.71806	9.20196	575.878	438.731	602.474	645.947	659.694	287.073	446.246	517.299	376.946	465.833
hsa_circ_0000339	chr11:73418464-73429763:-	RAB6A	circBase	312	3	11299	chr11:73390765-73418464|chr11:73429763-73431890	ENSG00000175582.19_2	ENST00000336083.7_1	NM_198896	cd_19, cd_34, K562, Helas3, H1hesc, Gm12878, Bj, Ag04450, A549, Nhek, Sknshra, diencephalon, Sy5y_exp1_D4, cerebellum, Sy5y_exp1_D0, occipital_lobe, frontal_cortex, Sy5y_exp1_D2, parietal_lobe, temporal_lobe, WAS2, ada_scid, neutophils, platelets	ANNOTATED, CDS, coding, INTERNAL	Maass2017, Memczak2013, Rybak2015, Salzman2013	-0.702355	0.614568	0.409965	0.703296	8.14281	8.84516	351.926	1124.25	0	322.973	439.796	95.691	254.998	295.599	452.335	310.555
hsa_circ_0003908	chr11:73418464-73431944:-	RAB6A	circBase	366	4	13480	chr11:73390765-73418464|chr11:73431944-73441809	ENSG00000175582.19_2	ENST00000310653.10_2	NM_002869	Hs68_RNase, Hs68_control, K562, Helas3, H1hesc, Gm12878, Bj, Ag04450, Sknshra, diencephalon, cerebellum, occipital_lobe, frontal_cortex, parietal_lobe, temporal_lobe, platelets	ANNOTATED, CDS, coding, INTERNAL, OVCODE, OVEXON	Jeck2013, Maass2017, Rybak2015, Salzman2013	-0.433098	0.74067	0.517389	0.772642	9.36236	9.79546	607.871	1453.3	556.13	789.49	989.542	813.373	828.743	369.499	301.557	931.665
hsa_circ_0006705	chr11:74500670-74528759:+	RNF169	circBase	340	3	28089	chr11:74460427-74500670|chr11:74528759-74545720	ENSG00000166439.5_3	ENST00000299563.4_1	NM_001098638	Hs68_RNase, Hs68_control, diencephalon, cerebellum, occipital_lobe, frontal_cortex, parietal_lobe, temporal_lobe, platelets	ANNOTATED, CDS, coding, INTERNAL, OVCODE, OVEXON	Jeck2013, Maass2017, Rybak2015	-0.763831	0.58893	0.312446	0.620181	8.13654	8.90037	639.865	191.945	370.753	538.289	623.045	526.3	573.745	73.8999	75.3892	77.6388
hsa_circ_0007458	chr11:76174864-76183884:+	C11orf30	circBase	537	2	9020	chr11:76171129-76174864|chr11:76183884-76207258	ENSG00000158636.16_4	ENST00000427574.6_1	NM_020193	Hs68_RNase, Hs68_control, K562, Huvec, Hsmm, Hepg2, Helas3, H1hesc, Gm12878, Bj, Ag04450, A549, Nhek, Sknshra, Mcf7, diencephalon, cerebellum, occipital_lobe, frontal_cortex, parietal_lobe, SY5Y_exp2_D8, temporal_lobe, VSMC, platelets	ANNOTATED, CDS, coding, INTERNAL, OVCODE, OVEXON	Jeck2013, Maass2017, Rybak2015, Salzman2013	1.02399	2.03353	0.292762	0.602243	7.8196	6.79562	31.9932	109.683	139.033	215.316	36.6497	287.073	127.499	147.8	301.557	232.916
hsa_circ_0007583	chr11:76207258-76239510:+	C11orf30	circBase	1086	6	32252	chr11:76183884-76207258|chr11:76239510-76246938	ENSG00000158636.16_4	ENST00000334736.7_1	NM_020193	Hs68_RNase, Hs68_control, diencephalon, cerebellum, occipital_lobe, frontal_cortex, parietal_lobe, temporal_lobe	ANNOTATED, CDS, coding, INTERNAL, OVCODE, OVEXON	Jeck2013, Rybak2015	0.285114	1.21851	0.848824	0.962468	7.51893	7.23382	95.9797	82.2622	231.721	179.43	146.599	287.073	63.7494	73.8999	452.335	0
hsa_circ_0023694	chr11:77330650-77336863:-	CLNS1A	circBase	474	4	6213	chr11:77327740-77330650|chr11:77336863-77340807	ENSG00000074201.8_2	ENST00000525428.5_1	NM_001293	K562, Helas3, Gm12878, Ag04450, Nhek, Sknshra, diencephalon, cerebellum, occipital_lobe, frontal_cortex, parietal_lobe, temporal_lobe, adipose, platelets	ANNOTATED, CDS, coding, INTERNAL, OVCODE, OVEXON, UTR3	Maass2017, Rybak2015, Salzman2013	-0.742953	0.597515	0.226419	0.552043	9.38383	10.1268	1599.66	1206.51	1158.6	1004.81	586.395	765.528	509.995	960.698	603.114	465.833
hsa_circ_0008342	chr11:77330650-77340944:-	CLNS1A	circBase	611	5	10294	chr11:77327740-77330650|chr11:77340944-77348634	ENSG00000074201.8_2	ENST00000525428.5_1	NM_001293	Hs68_RNase, Hs68_control, K562, Hepg2, Helas3, Gm12878, Bj, Ag04450, A549, Nhek, Sknshra, Mcf7, occipital_lobe, frontal_cortex, temporal_lobe	ANNOTATED, CDS, coding, INTERNAL, OVCODE, OVEXON, UTR3	Jeck2013, Rybak2015, Salzman2013	0.509948	1.424	0.55404	0.795782	8.18739	7.67744	287.939	356.469	231.721	71.7719	36.6497	334.918	191.248	517.299	226.168	155.278
hsa_circ_0000343	chr11:77336007-77336863:-	CLNS1A	circBase	210	2	856	chr11:77333718-77336007|chr11:77336863-77340807	ENSG00000074201.8_2	ENST00000525428.5_1	NM_001293	cd_34, neutr, Hs68_RNase, Hs68_control, K562, Huvec, Hepg2, Helas3, H1hesc, Gm12878, Bj, Ag04450, A549, Sknshra, diencephalon, Sy5y_exp1_D4, cerebellum, occipital_lobe, frontal_cortex, parietal_lobe, temporal_lobe, SY5Y_exp2_D4, platelets	ANNOTATED, CDS, coding, INTERNAL, OVCODE, OVEXON	Jeck2013, Maass2017, Memczak2013, Rybak2015, Salzman2013	-0.103337	0.930877	0.910018	0.990212	9.08563	9.18896	543.885	1041.99	787.851	179.43	329.847	621.991	764.993	369.499	603.114	310.555
hsa_circ_0000344	chr11:77394754-77404656:-	RSF1	circBase	350	4	9902	chr11:77389198-77394754|chr11:77404656-77409531	ENSG00000048649.13_3	ENST00000308488.10_1	NM_016578	cd_19, neutr, Hs68_RNase, Hs68_control, K562, Gm12878, Ag04450, A549, Nhlf, Sknshra, diencephalon, Sy5y_exp1_D4, cerebellum, Sy5y_exp1_D0, occipital_lobe, frontal_cortex, Sy5y_exp1_D2, parietal_lobe, temporal_lobe, WAS2, muscle, platelets	ANNOTATED, CDS, coding, INTERNAL, OVCODE, OVEXON	Jeck2013, Maass2017, Memczak2013, Rybak2015, Salzman2013	-0.669428	0.628756	0.420927	0.70841	8.06108	8.73051	287.939	740.359	556.13	322.973	183.248	95.691	254.998	221.7	452.335	310.555
hsa_circ_0096499	chr11:77404551-77413540:-	RSF1	circBase	2087	3	8989	chr11:77402283-77404551|chr11:77413540-77436589	ENSG00000048649.13_3	ENST00000308488.10_1	ENST00000308488.6	diencephalon, cerebellum, occipital_lobe, frontal_cortex, Sy5y_exp1_D2, parietal_lobe, temporal_lobe	ANNOTATED, CDS, coding, INTERNAL, OVCODE, OVEXON	Rybak2015	-3.79232	0.072177	0.00201047	0.0538045	4.23129	8.0236	287.939	356.469	185.377	287.087	146.599	0	63.7494	0	0	0
hsa_circ_0000345	chr11:77409531-77413540:-	RSF1	circBase	1982	2	4009	chr11:77404656-77409531|chr11:77413540-77436589	ENSG00000048649.13_3	ENST00000308488.10_1	NM_016578	cd_19, diencephalon, Sy5y_exp1_D4, cerebellum, occipital_lobe, frontal_cortex, Sy5y_exp1_D2, parietal_lobe, SY5Y_exp2_D8, temporal_lobe, WAS2, adipose, platelets	ANNOTATED, CDS, coding, INTERNAL	Maass2017, Memczak2013, Rybak2015	-0.688236	0.620612	0.312492	0.620181	8.88253	9.57077	1023.78	1014.57	602.474	789.49	329.847	813.373	637.494	73.8999	452.335	310.555
hsa_circ_0005935	chr11:78176921-78204241:-	NARS2	circBase	475	5	27320	chr11:78154804-78176921|chr11:78204241-78239887	ENSG00000137513.9_3	ENST00000281038.9_1	NM_024678	Hs68_RNase, Hs68_control, K562, Hepg2, Helas3, H1hesc, Gm12878, Bj, Ag04450, A549, Sknshra, Mcf7, diencephalon, cerebellum, Sy5y_exp1_D0, occipital_lobe, frontal_cortex, Sy5y_exp1_D2, parietal_lobe, temporal_lobe	ANNOTATED, CDS, coding, INTERNAL, OVCODE, OVEXON	Jeck2013, Rybak2015, Salzman2013	-1.32667	0.398688	0.178612	0.493235	6.73985	8.06652	319.932	219.366	0	287.087	476.446	95.691	318.747	0	75.3892	0
hsa_circ_0096554	chr11:8158924-8161740:-	RIC3	circBase	397	3	2816	chr11:8148351-8158924|chr11:8161740-8190412	ENSG00000166405.14_3	ENST00000343202.8_1	NR_045405	SY5Y_exp2_D0, diencephalon, cerebellum, Sy5y_exp1_D0, occipital_lobe, frontal_cortex, parietal_lobe, temporal_lobe	ANNOTATED, INTERNAL, ncRNA, OVCODE, OVEXON	Rybak2015	0.375349	1.29715	0.790187	0.939338	7.68742	7.31207	255.946	27.4207	46.3442	251.202	183.248	334.918	191.248	147.8	0	310.555
hsa_circ_0021087	chr11:8248521-8252051:-	LMO1	circBase	340	2	3530	chr11:8246268-8248521|chr11:8252051-8284884	ENSG00000166407.13_2	ENST00000335790.7_1	NM_002315	Sknshra, diencephalon, cerebellum, occipital_lobe, frontal_cortex, parietal_lobe, temporal_lobe	ANNOTATED, CDS, coding, INTERNAL, OVCODE, OVERLAPTX, OVEXON	Rybak2015, Salzman2013	5.76244	54.2836	0.00106101	0.040871	8.26408	2.50164	0	0	0	0	0	191.382	1147.49	0	0	155.278
hsa_circ_0096558	chr11:82560090-82571159:-	PRCP	circBase	753	5	11069	chr11:82550467-82560090|chr11:82571159-82611276	ENSG00000137509.10_4	ENST00000313010.7_2	ENST00000313010.3	diencephalon, cerebellum, occipital_lobe, frontal_cortex, parietal_lobe, temporal_lobe	ANNOTATED, CDS, coding, INTERNAL, OVCODE, OVEXON	Rybak2015	1.46754	2.76549	0.0852837	0.356976	8.46037	6.99284	63.9865	191.945	92.6884	143.544	109.949	143.536	828.743	73.8999	301.557	388.194
hsa_circ_0023861	chr11:82935896-82959129:+	ANKRD42	circBase	881	6	23233	chr11:82922472-82935896|chr11:82959129-82966886	ENSG00000137494.13_3	ENST00000260047.10_1	NM_182603	Helas3, Ag04450, A549, Sknshra, diencephalon, cerebellum, frontal_cortex, parietal_lobe, temporal_lobe	ALT_DONOR, CDS, coding, INTERNAL, OVCODE, OVEXON, UTR3	Rybak2015, Salzman2013	1.10015	2.14377	0.258699	0.581053	7.93168	6.83153	31.9932	0	46.3442	322.973	146.599	239.227	127.499	221.7	376.946	232.916
hsa_circ_0096576	chr11:82984689-82989872:-	CCDC90B	circBase	374	5	5183	chr11:82977021-82984689|chr11:82989872-82991183	ENSG00000137500.9_3	ENST00000529689.5_1	ENST00000529689.1	diencephalon, cerebellum, occipital_lobe, frontal_cortex, parietal_lobe, temporal_lobe	ANNOTATED, CDS, coding, INTERNAL, OVCODE, OVEXON	Rybak2015	-1.60837	0.32797	0.153863	0.453728	5.47075	7.07912	63.9865	109.683	231.721	179.43	73.2994	47.8455	63.7494	0	75.3892	0
hsa_circ_0096614	chr11:8435041-8486369:-	STK33	circBase	1005	9	51328	chr11:8414257-8435041|chr11:8486369-8494709	ENSG00000130413.15_3	ENST00000447869.5_1	ENST00000447869.1	SY5Y_exp2_D0, diencephalon, cerebellum, Sy5y_exp1_D0, occipital_lobe, frontal_cortex, parietal_lobe, temporal_lobe	ANNOTATED, CDS, coding, INTERNAL, OVCODE, OVERLAPTX, OVEXON	Rybak2015	0.673273	1.59469	0.421973	0.70841	9.24415	8.57088	895.81	274.207	0	466.517	219.898	382.764	1402.49	591.199	0	621.11
hsa_circ_0021089	chr11:8457040-8486369:-	STK33	circBase	807	8	29329	chr11:8435239-8457040|chr11:8486369-8494709	ENSG00000130413.15_3	ENST00000447869.5_1	NM_030906	Ag04450, diencephalon, cerebellum, occipital_lobe, frontal_cortex, Sy5y_exp1_D2, parietal_lobe, SY5Y_exp2_D8, temporal_lobe, SY5Y_exp2_D4	ANNOTATED, CDS, coding, INTERNAL, OVCODE, OVERLAPTX, OVEXON	Rybak2015, Salzman2013	-0.0629823	0.957283	1	1	8.0842	8.14718	575.878	219.366	0	430.631	146.599	382.764	318.747	147.8	75.3892	388.194
hsa_circ_0096633	chr11:8474368-8486369:-	STK33	circBase	532	5	12001	chr11:8462300-8474368|chr11:8486369-8494709	ENSG00000130413.15_3	ENST00000447869.5_1	ENST00000447869.1	diencephalon, cerebellum, occipital_lobe, SY5Y_exp2_D4	ANNOTATED, CDS, coding, INTERNAL, OVCODE, OVERLAPTX, OVEXON	Rybak2015	0.483284	1.39792	0.672987	0.873325	7.64945	7.16617	223.953	137.104	185.377	143.544	0	0	318.747	517.299	0	155.278
hsa_circ_0023891	chr11:85685750-85742653:-	PICALM	circBase	1688	18	56903	chr11:85670103-85685750|chr11:85742653-85779692	ENSG00000073921.17_3	ENST00000532317.5_1	NM_007166	K562, Huvec, Hsmm, Hepg2, Helas3, H1hesc, Gm12878, Bj, Ag04450, A549, Nhek, Sknshra, diencephalon, cerebellum, occipital_lobe, frontal_cortex, Sy5y_exp1_D2, parietal_lobe, temporal_lobe, vena_cava	ANNOTATED, CDS, coding, INTERNAL, OVCODE, OVERLAPTX, OVEXON	Maass2017, Rybak2015, Salzman2013	-0.72619	0.604498	0.328227	0.631349	8.18674	8.91293	319.932	301.628	648.819	430.631	696.344	95.691	509.995	147.8	150.778	543.471
hsa_circ_0023918	chr11:85701292-85742653:-	PICALM	circBase	1257	12	41361	chr11:85695016-85701292|chr11:85742653-85779692	ENSG00000073921.17_3	ENST00000526033.5_1	NM_007166	K562, Huvec, Hepg2, Helas3, Gm12878, Bj, Ag04450, A549, Nhek, Sknshra, diencephalon, cerebellum, occipital_lobe, frontal_cortex, parietal_lobe, temporal_lobe, cortex, vena_cava, platelets	ANNOTATED, CDS, coding, INTERNAL, OVCODE, OVERLAPTX, OVEXON	Maass2017, Rybak2015, Salzman2013	-1.84395	0.278557	0.090834	0.36173	8.41822	10.2622	2015.57	1206.51	92.6884	1614.87	1172.79	1243.98	382.497	0	0	0
hsa_circ_0023919	chr11:85707868-85714494:-	PICALM	circBase	451	4	6626	chr11:85695016-85707868|chr11:85714494-85718584	ENSG00000073921.17_3	ENST00000532317.5_1	NM_007166	K562, Huvec, Hepg2, Helas3, H1hesc, Gm12878, Bj, Ag04450, A549, Nhek, Sknshra, diencephalon, cerebellum, Sy5y_exp1_D0, occipital_lobe, frontal_cortex, Sy5y_exp1_D2, parietal_lobe, temporal_lobe, WAS2, LCL, platelets	ANNOTATED, CDS, coding, INTERNAL, OVCODE, OVEXON	Maass2017, Rybak2015, Salzman2013	1.34332	2.53734	0.0793291	0.346578	8.72223	7.37891	31.9932	246.786	278.065	107.658	146.599	191.382	764.993	369.499	301.557	465.833
hsa_circ_0023923	chr11:85707868-85742653:-	PICALM	circBase	1128	11	34785	chr11:85695016-85707868|chr11:85742653-85779692	ENSG00000073921.17_3	ENST00000532317.5_1	NM_007166	K562, Huvec, Hsmm, Hepg2, Helas3, H1hesc, Gm12878, Bj, Ag04450, A549, Nhek, Sknshra, Mcf7, diencephalon, cerebellum, Sy5y_exp1_D0, occipital_lobe, frontal_cortex, Sy5y_exp1_D2, parietal_lobe, temporal_lobe, chondrocytes, WAS2, cortex, vena_cava, right_atrium, placenta, platelets	ANNOTATED, CDS, coding, INTERNAL, OVCODE, OVERLAPTX, OVEXON	Maass2017, Rybak2015, Salzman2013	-0.245164	0.84372	0.679738	0.874583	10.5922	10.8374	1503.68	959.725	3244.09	1722.52	1722.54	909.064	2167.48	1330.2	1206.23	2096.25
hsa_circ_0023936	chr11:85718584-85742653:-	PICALM	circBase	677	7	24069	chr11:85714494-85718584|chr11:85742653-85779692	ENSG00000073921.17_3	ENST00000532317.5_1	NM_007166	K562, Hepg2, Helas3, H1hesc, Gm12878, Bj, Ag04450, A549, Nhek, Sknshra, diencephalon, cerebellum, occipital_lobe, frontal_cortex, parietal_lobe, temporal_lobe, SY5Y_exp2_D4, vena_cava, platelets	ANNOTATED, CDS, coding, INTERNAL, OVCODE, OVERLAPTX, OVEXON	Maass2017, Rybak2015, Salzman2013	0.19801	1.14712	0.812624	0.950125	9.12696	8.92895	223.953	191.945	787.851	717.719	513.096	669.837	1083.74	295.599	376.946	310.555
hsa_circ_0000347	chr11:85722072-85742653:-	PICALM	circBase	635	6	20581	chr11:85718626-85722072|chr11:85742653-85779692	ENSG00000073921.17_3	ENST00000532317.5_1	NM_007166	cd_19, neutr, K562, Hsmm, Hepg2, Helas3, H1hesc, Gm12878, Bj, Ag04450, Nhek, Sknshra, diencephalon, cerebellum, Sy5y_exp1_D0, occipital_lobe, frontal_cortex, parietal_lobe, temporal_lobe, SY5Y_exp2_D4, WAS2, neutophils, platelets	ANNOTATED, CDS, coding, INTERNAL	Maass2017, Memczak2013, Rybak2015, Salzman2013	-0.143939	0.905045	0.865211	0.969347	8.87203	9.01597	223.953	383.89	1112.26	358.859	513.096	478.455	764.993	369.499	452.335	232.916
hsa_circ_0023940	chr11:85723323-85742653:-	PICALM	circBase	528	5	19330	chr11:85722179-85723323|chr11:85742653-85779692	ENSG00000073921.17_3	ENST00000532317.5_1	NM_007166	K562, Hepg2, Bj, Ag04450, diencephalon, cerebellum, occipital_lobe, frontal_cortex, Sy5y_exp1_D2, parietal_lobe, temporal_lobe, vena_cava, neutophils, platelets	ANNOTATED, CDS, coding, INTERNAL, OVCODE, OVERLAPTX, OVEXON	Maass2017, Rybak2015, Salzman2013	1.55178	2.93179	0.184414	0.504776	7.546	5.99421	0	54.8414	139.033	107.658	0	191.382	254.998	221.7	0	232.916
hsa_circ_0023942	chr11:85733409-85742653:-	PICALM	circBase	322	3	9244	chr11:85726006-85733409|chr11:85742653-85779692	ENSG00000073921.17_3	ENST00000532317.5_1	NM_007166	K562, Huvec, Hepg2, Helas3, H1hesc, Gm12878, Bj, Ag04450, A549, Nhek, Nhlf, Sknshra, diencephalon, Sy5y_exp1_D4, cerebellum, Sy5y_exp1_D0, occipital_lobe, frontal_cortex, Sy5y_exp1_D2, parietal_lobe, temporal_lobe, WAS2, VSMC, vena_cava, HUAEC, neutophils, platelets	ANNOTATED, CDS, coding, INTERNAL, OVCODE, OVEXON	Maass2017, Rybak2015, Salzman2013	-0.658665	0.633464	0.387457	0.683729	8.28202	8.94068	159.966	329.049	834.195	394.745	732.994	287.073	764.993	147.8	150.778	155.278
hsa_circ_0007455	chr11:85961337-85967554:+	EED	circBase	438	4	6217	chr11:85956385-85961337|chr11:85967554-85968556	ENSG00000074266.19_3	ENST00000263360.10_1	NM_152991	Hs68_RNase, Hs68_control, K562, Huvec, Hepg2, Helas3, H1hesc, Gm12878, Ag04450, A549, Sknshra, Mcf7, diencephalon, cerebellum, occipital_lobe, frontal_cortex, parietal_lobe, temporal_lobe, platelets	ANNOTATED, CDS, coding, INTERNAL, OVCODE, OVEXON	Jeck2013, Maass2017, Rybak2015, Salzman2013	2.47646	5.56529	0.0755263	0.338557	7.47589	4.99943	0	54.8414	0	71.7719	0	0	637.494	221.7	0	0
hsa_circ_0023956	chr11:86017286-86017524:+	C11orf73	circBase	238	1	238	chr11:86013520-86017286|chr11:86017524-86048420	ENSG00000149196.15_3	ENST00000533986.5_1	NM_016401	K562, Huvec, Hepg2, H1hesc, Gm12878, Bj, Ag04450, Nhek, Sknshra, cerebellum, occipital_lobe, frontal_cortex, parietal_lobe, temporal_lobe	ANNOTATED, CDS, coding, INTERNAL, OVCODE, OVEXON	Rybak2015, Salzman2013	1.31884	2.49466	0.191236	0.514344	7.59512	6.27628	63.9865	27.4207	92.6884	0	183.248	95.691	318.747	73.8999	301.557	155.278
hsa_circ_0008359	chr11:86778735-86802437:+	TMEM135	circBase	255	3	23702	chr11:86749228-86778735|chr11:86802437-86947679	ENSG00000166575.16_3	ENST00000340353.11_1	NM_022918	Hs68_RNase, Hs68_control, K562, Huvec, Hepg2, Helas3, H1hesc, Gm12878, Bj, Ag04450, A549, Nhek, Sknshra, diencephalon, cerebellum, occipital_lobe, frontal_cortex, parietal_lobe, temporal_lobe, MSC_047	ANNOTATED, CDS, coding, INTERNAL, OVCODE, OVEXON	Jeck2013, Maass2017, Rybak2015, Salzman2013	0.452224	1.36815	0.533709	0.781641	9.64418	9.19195	223.953	109.683	926.884	1040.69	623.045	287.073	701.244	886.798	1432.4	698.749
hsa_circ_0000348	chr11:92085261-92088570:+	FAT3	circBase	3309	1	3309	None|chr11:92088570-92257799	ENSG00000165323.15_2	ENST00000409404.6_1	NM_001008781	HEK293, diencephalon, cerebellum, Sy5y_exp1_D0, occipital_lobe, frontal_cortex, Sy5y_exp1_D2, parietal_lobe, temporal_lobe, cortex, umbilical_cord	ANNOTATED, CDS, coding, UTR5	Maass2017, Memczak2013, Rybak2015	0.403086	1.32233	0.682646	0.876219	11.5674	11.1643	255.946	329.049	324.409	5885.29	4654.51	5167.31	1338.74	517.299	1281.62	6832.21
hsa_circ_0024043	chr11:94219089-94224131:-	MRE11A	circBase	294	2	5042	chr11:94212927-94219089|chr11:94224131-94225947	ENSG00000020922.12_3	ENST00000323929.7_2	NM_005590	A549, occipital_lobe, frontal_cortex, parietal_lobe, temporal_lobe	ANNOTATED, CDS, coding, INTERNAL, OVCODE, OVEXON	Rybak2015, Salzman2013	0.153871	1.11255	0.859646	0.967515	7.44492	7.29105	351.926	164.524	46.3442	179.43	0	0	191.248	443.399	150.778	77.6388
hsa_circ_0005092	chr11:9451220-9452550:+	IPO7	circBase	290	2	1330	chr11:9450743-9451220|chr11:9452550-9455116	ENSG00000205339.9_2	ENST00000379719.7_1	NM_006391	Hs68_RNase, Hs68_control, diencephalon, cerebellum, Sy5y_exp1_D0, occipital_lobe, frontal_cortex, parietal_lobe, temporal_lobe, platelets	ANNOTATED, CDS, coding, INTERNAL, OVCODE, OVEXON	Jeck2013, Maass2017, Rybak2015	3.67035	12.7317	0.0237621	0.188202	7.33709	3.66674	0	0	0	35.8859	0	47.8455	0	221.7	452.335	77.6388
hsa_circ_0024085	chr11:95825055-95826681:-	MAML2	circBase	1626	1	1626	chr11:95724887-95825055|chr11:95826681-96074546	ENSG00000184384.13_3	ENST00000524717.5_1	NM_032427	Huvec, Hepg2, H1hesc, Gm12878, Ag04450, Sknshra, diencephalon, cerebellum, Sy5y_exp1_D2, SY5Y_exp2_D4	ANNOTATED, CDS, coding, INTERNAL, OVCODE, OVEXON	Rybak2015, Salzman2013	1.61615	3.06555	0.0366281	0.230667	9.5356	7.91945	351.926	466.152	278.065	35.8859	36.6497	334.918	1529.99	517.299	452.335	854.026
hsa_circ_0007294	chr12:100166699-100175875:-	ANKS1B	circBase	459	4	9176	chr12:100048988-100166699|chr12:100175875-100200181	ENSG00000185046.18_3	ENST00000547776.6_1	NM_152788	Hs68_RNase, Hs68_control, diencephalon, cerebellum, occipital_lobe, frontal_cortex, parietal_lobe, temporal_lobe, cortex, vena_cava	ANNOTATED, CDS, coding, INTERNAL, OVCODE, OVEXON	Jeck2013, Maass2017, Rybak2015	-1.18524	0.439752	0.126129	0.416983	8.34718	9.53242	1311.72	987.146	231.721	645.947	476.446	621.991	127.499	665.099	0	155.278
hsa_circ_0096920	chr12:100166699-100200478:-	ANKS1B	circBase	756	5	33779	chr12:100048988-100166699|chr12:100200478-100205932	ENSG00000185046.18_3	ENST00000547776.6_1	NM_152788	diencephalon, cerebellum, occipital_lobe, frontal_cortex, parietal_lobe, temporal_lobe	ANNOTATED, CDS, coding, INTERNAL, OVCODE, OVEXON	Rybak2015	-0.227773	0.853952	0.861095	0.967515	7.39875	7.62652	191.959	137.104	46.3442	358.859	219.898	95.691	127.499	0	452.335	155.278
hsa_circ_0027857	chr12:100598717-100599522:+	ACTR6	circBase	187	2	805	chr12:100593008-100598717|chr12:100599522-100601440	ENSG00000075089.9_3	ENST00000551652.5_3	NM_022496	Nhek, K562, H1hesc, Gm12878, Ag04450, A549, Sknshra, diencephalon, Sy5y_exp1_D4, cerebellum, occipital_lobe, frontal_cortex, parietal_lobe, temporal_lobe, platelets	ANNOTATED, CDS, coding, INTERNAL, OVCODE, OVERLAPTX, OVEXON	Maass2017, Rybak2015, Salzman2013	0.0801747	1.05715	1	1	7.8128	7.73263	383.919	274.207	185.377	35.8859	146.599	430.609	254.998	221.7	0	155.278
hsa_circ_0096948	chr12:100598717-100599535:+	ACTR6	circBase	200	2	818	chr12:100594697-100598717|chr12:100599535-100601440	ENSG00000075089.9_3	ENST00000551517.5_1	ENST00000188312.2	diencephalon, cerebellum, Sy5y_exp1_D0, occipital_lobe, frontal_cortex, parietal_lobe, temporal_lobe	ALT_DONOR, CDS, coding, INTERNAL, intronic, OVCODE, OVERLAPTX, OVEXON	Rybak2015	0.424953	1.34253	0.697575	0.885516	7.42043	6.99548	63.9865	164.524	46.3442	0	329.847	95.691	0	443.399	150.778	155.278
hsa_circ_0006258	chr12:100676720-100691953:+	SCYL2	circBase	508	3	15233	chr12:100661174-100676720|chr12:100691953-100704821	ENSG00000136021.18_2	ENST00000549687.5_1	NM_017988	Hs68_RNase, Hs68_control, Nhek, K562, Huvec, Hepg2, Helas3, H1hesc, Gm12878, Bj, Ag04450, A549, Sknshra, Mcf7, diencephalon, Sy5y_exp1_D4, cerebellum, Sy5y_exp1_D0, occipital_lobe, frontal_cortex, parietal_lobe, temporal_lobe, vena_cava	ANNOTATED, CDS, coding, INTERNAL, OVCODE, OVEXON, UTR5	Jeck2013, Maass2017, Rybak2015, Salzman2013	2.94159	7.68258	0.030238	0.210683	7.64909	4.7075	0	27.4207	0	35.8859	36.6497	0	318.747	517.299	150.778	0
hsa_circ_0007851	chr12:101316003-101336313:+	ANO4	circBase	401	3	20310	chr12:101295618-101316003|chr12:101336313-101365083	ENSG00000151572.16_3	ENST00000549155.5_1	NM_178826	Hs68_RNase, Hs68_control, diencephalon, cerebellum, occipital_lobe, frontal_cortex, parietal_lobe, temporal_lobe	ALT_ACCEPTOR, CDS, coding, INTERNAL, intronic, OVCODE, OVEXON	Jeck2013, Rybak2015	-3.53627	0.086194	0.000622722	0.0303371	5.35951	8.89578	63.9865	137.104	834.195	825.376	513.096	143.536	0	0	0	0
hsa_circ_0027871	chr12:101316003-101381448:+	ANO4	circBase	741	6	65445	chr12:101295618-101316003|chr12:101381448-101413811	ENSG00000151572.16_3	ENST00000549155.5_1	NM_178826	Ag04450, diencephalon, cerebellum, occipital_lobe, frontal_cortex, parietal_lobe, temporal_lobe	ALT_ACCEPTOR, CDS, coding, INTERNAL, intronic, OVCODE, OVEXON	Rybak2015, Salzman2013	-0.978735	0.507424	0.298671	0.607698	7.5324	8.51114	127.973	191.945	509.786	538.289	439.796	621.991	0	221.7	0	0
hsa_circ_0008008	chr12:101365083-101381448:+	ANO4	circBase	340	3	16365	chr12:101336313-101365083|chr12:101381448-101413811	ENSG00000151572.16_3	ENST00000549155.5_1	NM_178826	Hs68_RNase, Hs68_control, Sknshra, diencephalon, cerebellum, occipital_lobe, frontal_cortex, parietal_lobe, temporal_lobe	ANNOTATED, CDS, coding, INTERNAL, OVCODE, OVEXON	Jeck2013, Rybak2015, Salzman2013	-2.19996	0.217644	0.0436875	0.256994	5.94459	8.14455	127.973	0	509.786	179.43	586.395	239.227	0	0	0	0
hsa_circ_0006660	chr12:102107867-102110590:+	CHPT1	circBase	568	4	2723	chr12:102090806-102107867|chr12:102110590-102113900	ENSG00000111666.10_4	ENST00000550385.1_1	NM_020244	Hs68_RNase, Hs68_control, K562, Hepg2, Bj, Ag04450, A549, diencephalon, cerebellum, occipital_lobe, frontal_cortex, parietal_lobe, temporal_lobe, platelets	ANNOTATED, CDS, coding, INTERNAL, OVCODE, OVEXON	Jeck2013, Maass2017, Rybak2015, Salzman2013	0.960909	1.94654	0.41548	0.705769	8.18429	7.22338	255.946	27.4207	0	430.631	0	191.382	127.499	960.698	0	155.278
hsa_circ_0002349	chr12:102433645-102439897:-	CCDC53	circBase	285	3	6252	chr12:102419816-102433645|chr12:102439897-102442067	ENSG00000120860.10_3	ENST00000538761.5_1	NM_016053	Hs68_RNase, Hs68_control, diencephalon, cerebellum, occipital_lobe, frontal_cortex, Sy5y_exp1_D2, parietal_lobe, temporal_lobe, WAS2, platelets	ANNOTATED, CDS, coding, INTERNAL, OVCODE, OVEXON	Jeck2013, Maass2017, Rybak2015	0.723931	1.65168	0.561974	0.800783	7.37548	6.65155	95.9797	0	92.6884	35.8859	256.548	0	0	221.7	452.335	155.278
hsa_circ_0097062	chr12:104179112-104182697:-	NT5DC3	circBase	310	3	3585	chr12:104174142-104179112|chr12:104182697-104186941	ENSG00000111696.11_3	ENST00000392876.7_1	NM_001031701	frontal_cortex	ANNOTATED, CDS, coding, INTERNAL, OVCODE, OVEXON	Rybak2015	4.8369	28.5793	0.00887546	0.118126	7.33854	2.50164	0	0	0	0	0	0	127.499	517.299	150.778	0
hsa_circ_0007044	chr12:104719114-104721449:+	TXNRD1	circBase	327	3	2335	chr12:104715094-104719114|chr12:104721449-104725311	ENSG00000198431.15_3	ENST00000525566.5_2	NM_003330	Hs68_RNase, Hs68_control, Huvec, Hepg2, Ag04450, A549, occipital_lobe, frontal_cortex	ANNOTATED, CDS, coding, INTERNAL, OVCODE, OVEXON	Jeck2013, Rybak2015, Salzman2013	4.96272	31.1836	0.013113	0.147811	7.46435	2.50164	0	0	0	0	0	0	127.499	738.999	0	0
hsa_circ_0097141	chr12:107002574-107048129:+	RFX4	circBase	272	3	45555	chr12:106977141-107002574|chr12:107048129-107075770	ENSG00000111783.12_2	ENST00000392842.5_1	NM_213594	diencephalon, cerebellum, frontal_cortex, parietal_lobe, temporal_lobe	ANNOTATED, CDS, coding, INTERNAL, OVCODE, OVERLAPTX, OVEXON	Rybak2015	2.27617	4.8439	0.0481129	0.270648	8.32173	6.04556	31.9932	82.2622	0	71.7719	109.949	191.382	1211.24	0	150.778	0
hsa_circ_0008366	chr12:107219503-107254190:+	RIC8B	circBase	710	5	34687	chr12:107209082-107219503|chr12:107254190-107264600	ENSG00000111785.19_3	ENST00000392837.8_3	NM_018157	Hs68_RNase, Hs68_control, diencephalon, cerebellum, occipital_lobe, frontal_cortex, parietal_lobe, temporal_lobe	ANNOTATED, CDS, coding, INTERNAL, OVCODE, OVEXON	Jeck2013, Rybak2015	4.1108	17.2773	4.81066e-05	0.00828074	8.78631	4.67551	0	54.8414	0	35.8859	0	765.528	318.747	147.8	150.778	776.388
hsa_circ_0002154	chr12:107236366-107237725:+	RIC8B	circBase	325	2	1359	chr12:107219598-107236366|chr12:107237725-107245227	ENSG00000111785.19_3	ENST00000392837.8_3	NM_018157	Hs68_RNase, Hs68_control, SY5Y_exp2_D0, diencephalon, cerebellum, Sy5y_exp1_D0, occipital_lobe, frontal_cortex, parietal_lobe, temporal_lobe, adipose, platelets	ANNOTATED, CDS, coding, INTERNAL, OVCODE, OVEXON	Jeck2013, Maass2017, Rybak2015	-0.867864	0.547958	0.302164	0.609426	7.38624	8.2541	191.959	329.049	324.409	215.316	439.796	287.073	127.499	369.499	0	0
hsa_circ_0000437	chr12:109046047-109048186:-	CORO1C	circBase	251	2	2139	chr12:109042796-109046047|chr12:109048186-109051079	ENSG00000110880.10_3	ENST00000261401.7_1	NM_014325	HEK293, cd_19, cd_34, Nhek, K562, Huvec, Hsmm, Hepg2, Helas3, H1hesc, Gm12878, Bj, Ag04450, A549, Sknshra, Mcf7, diencephalon, Sy5y_exp1_D4, cerebellum, Sy5y_exp1_D0, occipital_lobe, frontal_cortex, Sy5y_exp1_D2, parietal_lobe, SY5Y_exp2_D8, temporal_lobe, SY5Y_exp2_D4, EPC, chondrocytes, WAS2, ada_scid, adipose, decidua, VSMC, vena_cava, right_atrium, umbilical_cord, muscle, MSC_047, LCL, HUAEC,…	ANNOTATED, CDS, coding, INTERNAL	Maass2017, Memczak2013, Rybak2015, Salzman2013	0.745381	1.67642	0.214904	0.539245	12.1289	11.3835	1791.62	2824.33	4124.63	2332.59	2272.28	2822.88	9179.92	5542.49	2638.62	2173.89
hsa_circ_0028094	chr12:109509416-109511337:+	USP30	circBase	240	3	1921	chr12:109505432-109509416|chr12:109511337-109519138	ENSG00000135093.12_2	ENST00000392784.6_1	NM_032663	K562, Huvec, H1hesc, Gm12878, Bj, Ag04450, Sknshra, diencephalon, cerebellum, Sy5y_exp1_D0, occipital_lobe, frontal_cortex, Sy5y_exp1_D2, parietal_lobe, temporal_lobe, WAS2	ANNOTATED, CDS, coding, INTERNAL, OVCODE, OVEXON	Maass2017, Rybak2015, Salzman2013	0.575249	1.48993	0.571394	0.806197	8.64687	8.07162	191.959	0	1019.57	0	146.599	191.382	446.246	665.099	452.335	232.916
hsa_circ_0004516	chr12:110922882-110925748:+	C12orf24	circBase	519	4	2866	chr12:110910923-110922882|chr12:110925748-110927823	ENSG00000204856.11_2	ENST00000377673.9_1	NM_013300	Hs68_RNase, Hs68_control, diencephalon, Sy5y_exp1_D4, cerebellum, occipital_lobe, frontal_cortex, parietal_lobe, temporal_lobe, WAS2, platelets	ANNOTATED, CDS, coding, INTERNAL, OVCODE, OVEXON	Jeck2013, Maass2017, Rybak2015	0.45313	1.36901	0.632034	0.845539	7.68393	7.2308	95.9797	246.786	0	215.316	146.599	143.536	254.998	147.8	150.778	310.555
hsa_circ_0002273	chr12:111923074-111924628:-	ATXN2	circBase	278	3	1554	chr12:111908546-111923074|chr12:111924628-111926279	ENSG00000204842.14_4	ENST00000608853.5_1	NM_002973	Hs68_RNase, Hs68_control, Nhek, K562, Huvec, Helas3, Gm12878, Bj, Ag04450, A549, Sknshra, diencephalon, cerebellum, occipital_lobe, frontal_cortex, temporal_lobe, platelets	ANNOTATED, CDS, coding, INTERNAL, OVCODE, OVEXON	Jeck2013, Maass2017, Rybak2015, Salzman2013	-1.97783	0.253872	0.0818035	0.35123	5.74988	7.7277	31.9932	164.524	602.474	107.658	146.599	143.536	0	73.8999	0	0
hsa_circ_0000438	chr12:111951160-111957880:-	ATXN2	circBase	770	4	6720	chr12:111948386-111951160|chr12:111957880-111958685	ENSG00000204842.14_4	ENST00000389153.8_1	NM_002973	cd_19, Hs68_RNase, Hs68_control, Bj, A549, diencephalon, occipital_lobe, frontal_cortex, parietal_lobe, temporal_lobe	ANNOTATED, CDS, coding, INTERNAL, OVCODE, OVEXON	Jeck2013, Memczak2013, Rybak2015, Salzman2013	-0.277207	0.825187	0.867266	0.970226	7.37987	7.65708	319.932	438.731	92.6884	35.8859	73.2994	334.918	0	221.7	150.778	77.6388
hsa_circ_0002457	chr12:111990083-111993723:-	ATXN2	circBase	320	4	3640	chr12:111963120-111990083|chr12:111993723-112036587	ENSG00000204842.14_4	ENST00000389153.8_1	NM_002973	Hs68_RNase, Hs68_control, Nhek, K562, H1hesc, Gm12878, Bj, Ag04450, A549, Sknshra, SY5Y_exp2_D0, diencephalon, Sy5y_exp1_D4, cerebellum, Sy5y_exp1_D0, occipital_lobe, frontal_cortex, Sy5y_exp1_D2, parietal_lobe, temporal_lobe, SY5Y_exp2_D4, cortex, vena_cava, LCL, platelets	ANNOTATED, CDS, coding, INTERNAL, OVCODE, OVEXON	Jeck2013, Maass2017, Rybak2015, Salzman2013	-1.03433	0.488241	0.105823	0.387019	8.88446	9.91879	799.831	1261.35	417.098	1471.32	842.943	382.764	446.246	443.399	376.946	698.749
hsa_circ_0000439	chr12:111991961-111993723:-	ATXN2	circBase	97	2	1762	chr12:111990781-111991961|chr12:111993723-112036587	ENSG00000204842.14_4	ENST00000389153.8_1	NM_002973	cd_19, K562, Bj, Ag04450, A549, Sknshra, SY5Y_exp2_D0, diencephalon, Sy5y_exp1_D4, cerebellum, Sy5y_exp1_D0, occipital_lobe, frontal_cortex, Sy5y_exp1_D2, parietal_lobe, SY5Y_exp2_D8, temporal_lobe, SY5Y_exp2_D4, WAS2	ANNOTATED, CDS, coding, INTERNAL	Maass2017, Memczak2013, Rybak2015, Salzman2013	0.49573	1.41003	0.531398	0.781641	8.75679	8.26106	639.865	246.786	92.6884	71.7719	439.796	239.227	764.993	295.599	452.335	388.194
hsa_circ_0004206	chr12:112371689-112381173:-	TMEM116	circBase	523	5	9484	chr12:112370463-112371689|chr12:112381173-112429561	ENSG00000198270.12_4	ENST00000550831.7_3	NM_001193531	Hs68_RNase, Hs68_control, Nhek, K562, Huvec, Hepg2, Helas3, H1hesc, Gm12878, Bj, Ag04450, A549, Sknshra, diencephalon, cerebellum, occipital_lobe, frontal_cortex, parietal_lobe, temporal_lobe, SY5Y_exp2_D4	ANNOTATED, CDS, coding, INTERNAL, OVCODE, OVEXON	Jeck2013, Rybak2015, Salzman2013	-0.383384	0.766637	0.698853	0.886615	7.14476	7.52815	127.973	109.683	231.721	287.087	146.599	239.227	191.248	221.7	0	0
hsa_circ_0097378	chr12:112513481-112516545:-	NAA25	circBase	299	3	3064	chr12:112512568-112513481|chr12:112516545-112518863	ENSG00000111300.9_3	ENST00000261745.8_1	ENST00000261745.4	diencephalon, cerebellum, occipital_lobe, frontal_cortex, parietal_lobe, temporal_lobe	ANNOTATED, CDS, coding, INTERNAL, OVCODE, OVEXON	Rybak2015	-1.9535	0.25819	0.0937594	0.369598	6.12949	8.08299	671.858	438.731	92.6884	107.658	0	95.691	0	221.7	0	0
hsa_circ_0002584	chr12:112757028-112757546:-	C12orf51	circBase	518	1	518	chr12:112752350-112757028|chr12:112757546-112819755	ENSG00000173064.12_3	ENST00000550722.5_1	NM_001109662	Hs68_RNase, Hs68_control, diencephalon, cerebellum, occipital_lobe, frontal_cortex, parietal_lobe, temporal_lobe, platelets	ANNOTATED, CDS, coding, INTERNAL, OVCODE, OVEXON, UTR5	Jeck2013, Maass2017, Rybak2015	-0.929361	0.525091	0.216749	0.542103	7.93662	8.86598	479.898	603.256	417.098	430.631	366.497	382.764	254.998	147.8	0	388.194
hsa_circ_0000373	chr12:1136913-1137738:+	ERC1	circBase	825	1	825	chr12:1100488-1136913|chr12:1137738-1192329	ENSG00000082805.19_3	ENST00000543086.7_1	NM_178040	HEK293, cd_19, Hs68_RNase, Hs68_control, Nhek, K562, Helas3, Bj, Ag04450, A549, diencephalon, cerebellum, Sy5y_exp1_D0, occipital_lobe, frontal_cortex, Sy5y_exp1_D2, parietal_lobe, temporal_lobe, vena_cava, right_atrium, MSC_047	ANNOTATED, CDS, coding, INTERNAL, ncRNA, OVCODE, OVEXON, UTR5	Jeck2013, Maass2017, Memczak2013, Rybak2015, Salzman2013	-0.230293	0.852462	0.798265	0.944601	8.69071	8.921	703.851	466.152	46.3442	502.403	659.694	478.455	573.745	738.999	150.778	77.6388
hsa_circ_0002857	chr12:113705647-113707650:+	TPCN1	circBase	334	3	2003	chr12:113704161-113705647|chr12:113707650-113710462	ENSG00000186815.12_3	ENST00000335509.10_1	NM_001143819	Hs68_RNase, Hs68_control, Nhek, K562, Hepg2, Helas3, H1hesc, Gm12878, Bj, Ag04450, A549, Sknshra, diencephalon, cerebellum, occipital_lobe, frontal_cortex, parietal_lobe, temporal_lobe	ANNOTATED, CDS, coding, INTERNAL, OVCODE, OVEXON	Jeck2013, Rybak2015, Salzman2013	-0.36156	0.778323	0.808083	0.948248	6.66736	7.02892	159.966	27.4207	231.721	71.7719	146.599	47.8455	63.7494	73.8999	0	310.555
hsa_circ_0000441	chr12:116534473-116549317:-	MED13L	circBase	169	2	14844	chr12:116460406-116534473|chr12:116549317-116675272	ENSG00000123066.7_3	ENST00000281928.7_2	NM_015335	neutr, Hs68_RNase, Hs68_control, diencephalon, cerebellum, Sy5y_exp1_D0, occipital_lobe, frontal_cortex, Sy5y_exp1_D2, parietal_lobe, temporal_lobe, WAS2, decidua, right_atrium, muscle, MSC_047, neutophils, fibroblasts	ANNOTATED, CDS, coding, INTERNAL, OVCODE, OVEXON	Jeck2013, Maass2017, Memczak2013, Rybak2015	0.337215	1.26332	0.841911	0.960571	7.46256	7.12535	95.9797	274.207	185.377	35.8859	73.2994	334.918	191.248	221.7	75.3892	0
hsa_circ_0000446	chr12:118619175-118619412:-	TAOK3	circBase	237	1	237	chr12:118615134-118619175|chr12:118619412-118627611	ENSG00000135090.13_3	ENST00000419821.6_1	NM_016281	cd_19, Hs68_RNase, Hs68_control, Nhek, K562, Helas3, H1hesc, Gm12878, Bj, Ag04450, A549, Sknshra, diencephalon, cerebellum, occipital_lobe, frontal_cortex, Sy5y_exp1_D2, parietal_lobe, temporal_lobe, VSMC, platelets	ANNOTATED, CDS, coding, INTERNAL, OVCODE, OVEXON	Jeck2013, Maass2017, Memczak2013, Rybak2015, Salzman2013	1.09472	2.13572	0.26529	0.585453	7.43021	6.33549	95.9797	54.8414	0	35.8859	183.248	47.8455	127.499	147.8	376.946	155.278
hsa_circ_0004123	chr12:12022357-12022903:+	ETV6	circBase	546	1	546	chr12:12006495-12022357|chr12:12022903-12037378	ENSG00000139083.10_2	ENST00000396373.8_1	NM_001987	Hs68_RNase, Hs68_control, K562, Helas3, H1hesc, Gm12878, Bj, Ag04450, A549, Sknshra, Mcf7, cerebellum, occipital_lobe, frontal_cortex, parietal_lobe	ANNOTATED, CDS, coding, INTERNAL, OVCODE, OVEXON	Jeck2013, Rybak2015, Salzman2013	0.796676	1.73709	0.625042	0.840064	6.76306	5.96639	191.959	82.2622	0	0	0	0	0	0	301.557	232.916
hsa_circ_0000448	chr12:120592773-120593523:-	GCN1L1	circBase	389	3	750	chr12:120591713-120592773|chr12:120593523-120594264	ENSG00000089154.10_2	ENST00000300648.6_1	NM_006836	HEK293, cd_19, Hs68_RNase, Hs68_control, SY5Y_exp2_D0, diencephalon, Sy5y_exp1_D4, cerebellum, Sy5y_exp1_D0, occipital_lobe, frontal_cortex, Sy5y_exp1_D2, parietal_lobe, temporal_lobe, WAS2, ada_scid, LCL	ANNOTATED, CDS, coding, INTERNAL, OVCODE, OVEXON	Jeck2013, Maass2017, Memczak2013, Rybak2015	0.969441	1.95808	0.117136	0.407058	9.93489	8.96545	447.905	411.311	417.098	645.947	549.745	861.219	701.244	1551.9	678.503	1086.94
hsa_circ_0028899	chr12:120995084-120995485:+	RNF10	circBase	322	2	401	chr12:120992611-120995084|chr12:120995485-120998528	ENSG00000022840.15_3	ENST00000325954.8_2	NM_014868	Nhek, K562, Hepg2, Helas3, H1hesc, Gm12878, Bj, Ag04450, A549, Nhlf, Sknshra, Mcf7, diencephalon, cerebellum, occipital_lobe, frontal_cortex, parietal_lobe, temporal_lobe, right_atrium, muscle, platelets	ANNOTATED, CDS, coding, INTERNAL, OVCODE, OVEXON	Maass2017, Rybak2015, Salzman2013	0.0469455	1.03308	1	1	7.03699	6.99005	0	219.366	324.409	0	73.2994	0	191.248	221.7	75.3892	155.278
hsa_circ_0003472	chr12:121220457-121222396:-	SPPL3	circBase	312	3	1939	chr12:121206862-121220457|chr12:121222396-121229271	ENSG00000157837.15_3	ENST00000353487.6_1	NM_139015	Hs68_RNase, Hs68_control, Nhek, K562, Huvec, Hsmm, Hepg2, Helas3, H1hesc, Gm12878, Bj, Ag04450, A549, Nhlf, Sknshra, Mcf7, SY5Y_exp2_D0, diencephalon, Sy5y_exp1_D4, cerebellum, Sy5y_exp1_D0, occipital_lobe, frontal_cortex, parietal_lobe, temporal_lobe, decidua, neutophils, platelets	ANNOTATED, CDS, coding, INTERNAL, OVCODE, OVEXON	Jeck2013, Maass2017, Rybak2015, Salzman2013	0.975987	1.96699	0.175553	0.489682	9.67181	8.69582	223.953	520.994	695.163	358.859	256.548	287.073	509.995	1847.5	1206.23	232.916
hsa_circ_0004479	chr12:121220457-121229360:-	SPPL3	circBase	401	4	8903	chr12:121206862-121220457|chr12:121229360-121248611	ENSG00000157837.15_3	ENST00000353487.6_1	NM_139015	Hs68_RNase, Hs68_control, Nhek, K562, Huvec, Hepg2, Helas3, H1hesc, Gm12878, Bj, Ag04450, A549, Sknshra, diencephalon, cerebellum, Sy5y_exp1_D0, occipital_lobe, frontal_cortex, Sy5y_exp1_D2, parietal_lobe, temporal_lobe, WAS2, platelets	ANNOTATED, CDS, coding, INTERNAL, OVCODE, OVEXON	Jeck2013, Maass2017, Rybak2015, Salzman2013	-0.24381	0.844512	0.823162	0.95438	7.71834	7.96215	319.932	164.524	417.098	71.7719	256.548	287.073	127.499	147.8	452.335	0
hsa_circ_0029069	chr12:122825299-122826244:-	CLIP1	circBase	945	1	945	chr12:122821295-122825299|chr12:122826244-122831921	ENSG00000130779.19_3	ENST00000302528.11_2	NM_001247997	K562, Gm12878, Ag04450, A549, Sknshra, diencephalon, Sy5y_exp1_D4, cerebellum, occipital_lobe, frontal_cortex, parietal_lobe, temporal_lobe	ANNOTATED, CDS, coding, INTERNAL, OVCODE, OVEXON	Rybak2015, Salzman2013	-1.75122	0.297051	0.0783416	0.345184	6.59172	8.34294	575.878	575.835	92.6884	35.8859	293.197	95.691	127.499	147.8	0	77.6388
hsa_circ_0005465	chr12:122861935-122865105:-	CLIP1	circBase	763	2	3170	chr12:122848654-122861935|chr12:122865105-122907067	ENSG00000130779.19_3	ENST00000361654.8_3	NM_001247997	Hs68_RNase, Hs68_control, Nhek, K562, Hepg2, Gm12878, Bj, Ag04450, A549, diencephalon, cerebellum, occipital_lobe, frontal_cortex, parietal_lobe, temporal_lobe, osteocytes, placenta, platelets, MSC	ANNOTATED, CDS, coding, INTERNAL, OVCODE, OVEXON, UTR5	Jeck2013, Maass2017, Rybak2015, Salzman2013	-0.265163	0.832104	0.841689	0.960571	8.09127	8.35644	767.838	603.256	0	215.316	0	287.073	0	295.599	527.725	232.916
hsa_circ_0008932	chr12:12332743-12340053:-	LRP6	circBase	898	4	7310	chr12:12318229-12332743|chr12:12340053-12356136	ENSG00000070018.8_2	ENST00000261349.8_1	NM_002336	Hs68_RNase, Hs68_control, K562, Hepg2, H1hesc, Ag04450, diencephalon, Sy5y_exp1_D4, cerebellum, Sy5y_exp1_D0, occipital_lobe, frontal_cortex, Sy5y_exp1_D2, parietal_lobe, temporal_lobe	ANNOTATED, CDS, coding, INTERNAL, OVCODE, OVEXON	Jeck2013, Rybak2015, Salzman2013	-1.65814	0.316846	0.16688	0.479439	5.50266	7.16081	127.973	82.2622	231.721	71.7719	183.248	47.8455	0	0	0	155.278
hsa_circ_0000378	chr12:12397195-12397589:-	LRP6	circBase	394	1	394	chr12:12356334-12397195|chr12:12397589-12419614	ENSG00000070018.8_2	ENST00000261349.8_1	NM_002336	HEK293, cd_19, Hs68_RNase, Hs68_control, Nhek, K562, Huvec, Bj, Ag04450, diencephalon, cerebellum, occipital_lobe, frontal_cortex, Sy5y_exp1_D2, parietal_lobe, temporal_lobe, SY5Y_exp2_D4, vena_cava	ANNOTATED, CDS, coding, INTERNAL, OVCODE, OVEXON	Jeck2013, Maass2017, Memczak2013, Rybak2015, Salzman2013	-0.780607	0.582122	0.268796	0.587881	9.3143	10.0949	1439.7	1974.29	370.753	1076.58	549.745	669.837	1338.74	738.999	301.557	77.6388
hsa_circ_0007552	chr12:123983090-123984083:-	RILPL1	circBase	341	2	993	chr12:123970352-123983090|chr12:123984083-124008041	ENSG00000188026.12_3	ENST00000376874.8_1	NM_178314	Hs68_RNase, Hs68_control, K562, Bj, Ag04450, Sknshra, diencephalon, cerebellum, Sy5y_exp1_D0, occipital_lobe, frontal_cortex, Sy5y_exp1_D2, parietal_lobe, temporal_lobe	ANNOTATED, CDS, coding, INTERNAL, OVCODE, OVEXON	Jeck2013, Rybak2015, Salzman2013	-0.273461	0.827332	0.690859	0.883069	9.70737	9.98084	415.912	493.573	2641.62	861.262	659.694	909.064	892.492	1034.6	376.946	931.665
hsa_circ_0029308	chr12:124904502-124915333:-	NCOR2	circBase	600	5	10831	chr12:124887107-124904502|chr12:124915333-124922475	ENSG00000196498.13_4	ENST00000405201.5_1	NM_006312	K562, Hsmm, Gm12878, Bj, Ag04450, Sknshra, diencephalon, Sy5y_exp1_D4, cerebellum, Sy5y_exp1_D0, occipital_lobe, frontal_cortex, Sy5y_exp1_D2, parietal_lobe, temporal_lobe, ada_scid, platelets	ANNOTATED, CDS, coding, INTERNAL, OVCODE, OVEXON	Maass2017, Rybak2015, Salzman2013	-0.397011	0.75943	0.680315	0.874583	8.02252	8.41953	383.919	438.731	278.065	430.631	146.599	765.528	0	0	0	465.833
hsa_circ_0029309	chr12:124904502-124922542:-	NCOR2	circBase	667	6	18040	chr12:124887107-124904502|chr12:124922542-124934360	ENSG00000196498.13_4	ENST00000405201.5_1	NM_006312	K562, Gm12878, Bj, Sknshra, diencephalon, cerebellum, occipital_lobe, frontal_cortex, parietal_lobe, temporal_lobe	ANNOTATED, CDS, coding, INTERNAL, OVCODE, OVEXON	Rybak2015, Salzman2013	0.922159	1.89495	0.217204	0.542205	8.67446	7.7523	287.939	109.683	185.377	358.859	109.949	526.3	127.499	591.199	301.557	465.833
hsa_circ_0005750	chr12:124934360-124979914:-	NCOR2	circBase	932	7	45554	chr12:124922542-124934360|chr12:124979914-125020110	ENSG00000196498.13_4	ENST00000404621.5_1	NM_006312	Hs68_RNase, Hs68_control	ANNOTATED, CDS, coding, INTERNAL, OVCODE, OVEXON, UTR5	Jeck2013	3.43617	10.8241	0.00823148	0.114694	7.74266	4.30648	0	0	0	71.7719	0	0	446.246	147.8	150.778	310.555
hsa_circ_0097861	chr12:128899276-128900165:+	TMEM132C	circBase	889	1	889	chr12:128752032-128899276|chr12:128900165-129028501	ENSG00000181234.9_3	ENST00000435159.2_2	NM_001136103	diencephalon, cerebellum, occipital_lobe, frontal_cortex, parietal_lobe	ANNOTATED, CDS, coding, INTERNAL, OVCODE, OVEXON	Rybak2015	1.39506	2.62999	0.219391	0.545205	7.32957	5.93451	31.9932	54.8414	46.3442	107.658	36.6497	47.8455	0	591.199	0	155.278
hsa_circ_0097864	chr12:1289705-1299218:+	ERC1	circBase	614	4	9513	chr12:1250953-1289705|chr12:1299218-1345934	ENSG00000082805.19_3	ENST00000543086.7_1	NR_027948	diencephalon, cerebellum, occipital_lobe, frontal_cortex, parietal_lobe, temporal_lobe	ANNOTATED, INTERNAL, ncRNA, OVCODE, OVEXON	Rybak2015	-2.6805	0.155987	0.00712316	0.10693	6.40833	9.08884	863.817	1343.62	92.6884	143.544	219.898	95.691	0	0	150.778	155.278
hsa_circ_0006689	chr12:129293332-129299615:-	SLC15A4	circBase	712	4	6283	chr12:129285554-129293332|chr12:129299615-129307942	ENSG00000139370.11_3	ENST00000266771.9_1	NM_145648	Hs68_RNase, Hs68_control, Nhek, K562, Huvec, Hepg2, Helas3, H1hesc, Gm12878, Bj, Ag04450, A549, Nhlf, Sknshra, Mcf7, diencephalon, cerebellum, Sy5y_exp1_D0, occipital_lobe, frontal_cortex, parietal_lobe, temporal_lobe	ANNOTATED, CDS, coding, INTERNAL, OVCODE, OVEXON	Jeck2013, Rybak2015, Salzman2013	0.47098	1.38605	0.795244	0.941815	6.85666	6.38568	127.973	54.8414	139.033	35.8859	36.6497	47.8455	63.7494	0	452.335	0
hsa_circ_0000462	chr12:129299319-129299615:-	SLC15A4	circBase	296	1	296	chr12:129294656-129299319|chr12:129299615-129307942	ENSG00000139370.11_3	ENST00000266771.9_1	NM_145648	neutr, Hs68_RNase, Hs68_control, Nhek, K562, Huvec, Hepg2, Helas3, H1hesc, Gm12878, Bj, Ag04450, A549, Sknshra, diencephalon, cerebellum, occipital_lobe, frontal_cortex, Sy5y_exp1_D2, parietal_lobe, temporal_lobe, platelets	ANNOTATED, CDS, coding, INTERNAL, OVCODE, OVEXON	Jeck2013, Maass2017, Memczak2013, Rybak2015, Salzman2013	-0.16976	0.888991	0.937184	1	7.50006	7.66982	159.966	493.573	139.033	71.7719	109.949	143.536	0	517.299	226.168	0
hsa_circ_0097876	chr12:130184354-130185243:-	TMEM132D	circBase	889	1	889	chr12:130015750-130184354|chr12:130185243-130387805	ENSG00000151952.15_3	ENST00000422113.6_1	NM_133448	diencephalon, cerebellum, occipital_lobe, frontal_cortex, parietal_lobe, temporal_lobe	ANNOTATED, CDS, coding, INTERNAL, OVCODE, OVEXON	Rybak2015	-0.733781	0.601326	0.393148	0.688853	8.21425	8.94803	159.966	137.104	556.13	574.175	1026.19	1052.6	254.998	0	0	77.6388
hsa_circ_0097878	chr12:130884223-130907106:-	RIMBP2	circBase	771	6	22883	chr12:130883706-130884223|chr12:130907106-130912723	ENSG00000060709.14_3	ENST00000261655.8_1	NM_015347	SY5Y_exp2_D0, diencephalon, Sy5y_exp1_D0, occipital_lobe, frontal_cortex, Sy5y_exp1_D2, parietal_lobe, temporal_lobe	ANNOTATED, CDS, coding, INTERNAL, OVCODE, OVEXON	Rybak2015	-2.00203	0.249649	0.106862	0.387591	5.91507	7.9171	0	0	92.6884	322.973	769.643	239.227	0	0	0	0
hsa_circ_0029596	chr12:133768074-133768589:+	ZNF268	circBase	223	2	515	chr12:133764658-133768074|chr12:133768589-133770013	ENSG00000256825.4_4	ENST00000540096.2_1	NM_152943	Nhek, K562, Huvec, Hepg2, Helas3, H1hesc, Gm12878, Bj, Ag04450, A549, Sknshra, diencephalon, cerebellum, occipital_lobe, frontal_cortex, parietal_lobe, temporal_lobe	ANNOTATED, CDS, coding, INTERNAL, OVCODE, OVEXON	Rybak2015, Salzman2013	-5.27875	0.0257596	0.000331881	0.0208747	2.50164	7.78038	191.959	191.945	370.753	179.43	146.599	0	0	0	0	0
hsa_circ_0097961	chr12:1372199-1399178:+	ERC1	circBase	293	2	26979	chr12:1346070-1372199|chr12:1399178-1480998	ENSG00000082805.19_3	ENST00000543086.7_1	NR_027948	diencephalon, cerebellum, occipital_lobe, frontal_cortex, parietal_lobe, temporal_lobe	ANNOTATED, INTERNAL, ncRNA, OVCODE, OVERLAPTX, OVEXON	Rybak2015	-3.70034	0.0769283	0.000308531	0.0204263	7.32845	11.0288	3711.21	4990.57	92.6884	825.376	769.643	239.227	0	0	301.557	232.916
chr12:1372199-1481143:+	chr12:1372199-1481143:+	ERC1	CIRCexplorer2	438	3	108944	chr12:1346070-1372199|chr12:1481143-1517314	ENSG00000082805.19_3	ENST00000543086.7_1	NA	NA	NA	NA	-4.00442	0.062309	0.000195609	0.0162923	4.89813	8.90255	831.824	1041.99	139.033	179.43	146.599	95.691	0	0	0	0
chr12:1372199-1553916:+	chr12:1372199-1553916:+	ERC1	CIRCexplorer2	726	5	181717	chr12:1346070-1372199|chr12:1553916-1599258	ENSG00000082805.19_3	ENST00000543086.7_1	NA	NA	NA	NA	-4.0558	0.0601286	0.000979493	0.0401437	4.99359	9.04939	1119.76	1151.67	0	251.202	73.2994	0	127.499	0	0	0
hsa_circ_0024996	chr12:1399017-1399178:+	ERC1	circBase	161	1	161	chr12:1372331-1399017|chr12:1399178-1480998	ENSG00000082805.19_3	ENST00000543086.7_1	NR_027948	K562, Bj, diencephalon, cerebellum, occipital_lobe, frontal_cortex, parietal_lobe, temporal_lobe, platelets	ANNOTATED, INTERNAL, ncRNA, OVCODE, OVEXON	Maass2017, Rybak2015, Salzman2013	-7.13154	0.0071317	2.51194e-07	0.000648583	2.50164	9.63317	831.824	1700.08	185.377	681.833	513.096	0	0	0	0	0
hsa_circ_0024997	chr12:1399017-1481143:+	ERC1	circBase	306	2	82126	chr12:1372331-1399017|chr12:1481143-1517314	ENSG00000082805.19_3	ENST00000543086.7_1	NR_027948	K562, Ag04450, A549, Sknshra, diencephalon, cerebellum, occipital_lobe, frontal_cortex, parietal_lobe, temporal_lobe, cortex	ANNOTATED, INTERNAL, ncRNA, OVCODE, OVEXON	Maass2017, Rybak2015, Salzman2013	-2.33301	0.19847	0.00733935	0.108909	7.40675	9.73975	1119.76	1727.51	324.409	538.289	513.096	478.455	0	295.599	0	0
chr12:1399017-1519619:+	chr12:1399017-1519619:+	ERC1	CIRCexplorer2	470	4	120602	chr12:1346070-1399017|chr12:1519619-1553727	ENSG00000082805.19_3	ENST00000542302.6_1	NA	NA	NA	NA	-2.53785	0.172199	0.0087022	0.117026	8.0026	10.5405	2111.55	2440.44	463.442	1471.32	916.242	1052.6	127.499	0	0	0
hsa_circ_0024999	chr12:1399017-1553916:+	ERC1	circBase	594	4	154899	chr12:1372331-1399017|chr12:1553916-1599258	ENSG00000082805.19_3	ENST00000543086.7_1	NR_027948	Sknshra	ANNOTATED, INTERNAL, ncRNA, OVCODE, OVERLAPTX, OVEXON	Salzman2013	-3.65766	0.0792383	4.71801e-05	0.00828074	6.89508	10.5527	2527.47	2961.44	370.753	825.376	769.643	430.609	0	0	0	77.6388
hsa_circ_0006747	chr12:1480998-1553916:+	ERC1	circBase	433	3	72918	chr12:1399178-1480998|chr12:1553916-1599258	ENSG00000082805.19_3	ENST00000543086.7_1	NR_027948	Hs68_RNase, Hs68_control, Bj, A549, diencephalon, cerebellum, occipital_lobe, frontal_cortex, parietal_lobe, SY5Y_exp2_D8, temporal_lobe, platelets	ANNOTATED, INTERNAL, ncRNA, OVCODE, OVEXON	Jeck2013, Maass2017, Rybak2015, Salzman2013	-1.35768	0.390209	0.164883	0.475144	7.24894	8.60662	543.885	987.146	0	179.43	183.248	239.227	318.747	147.8	0	0
hsa_circ_0006611	chr12:19406873-19413955:+	PLEKHA5	circBase	383	4	7082	chr12:19285384-19406873|chr12:19413955-19418683	ENSG00000052126.14_3	ENST00000429027.6_1	NM_001143821	Hs68_RNase, Hs68_control, Helas3, Ag04450, diencephalon, cerebellum, occipital_lobe, frontal_cortex, parietal_lobe, temporal_lobe	ANNOTATED, CDS, coding, INTERNAL, OVCODE, OVEXON	Jeck2013, Rybak2015, Salzman2013	1.89024	3.70696	0.125649	0.415932	7.63221	5.74198	0	54.8414	0	107.658	73.2994	47.8455	318.747	0	376.946	232.916
hsa_circ_0025544	chr12:19406873-19418784:+	PLEKHA5	circBase	484	5	11911	chr12:19285384-19406873|chr12:19418784-19422703	ENSG00000052126.14_3	ENST00000429027.6_1	NM_001143821	H1hesc, diencephalon, cerebellum, occipital_lobe, frontal_cortex, parietal_lobe, temporal_lobe	ANNOTATED, CDS, coding, INTERNAL, OVCODE, OVEXON	Rybak2015, Salzman2013	1.24808	2.37525	0.243318	0.569581	7.94496	6.69688	95.9797	164.524	0	71.7719	146.599	0	382.497	221.7	0	621.11
hsa_circ_0006420	chr12:19615443-19626289:+	AEBP2	circBase	316	2	10846	chr12:19557150-19615443|chr12:19626289-19646733	ENSG00000139154.14_4	ENST00000538425.5_3	NM_153207	Hs68_RNase, Hs68_control, Nhek, K562, Huvec, Hepg2, Helas3, H1hesc, Gm12878, Bj, Ag04450, A549, Sknshra, SY5Y_exp2_D0, diencephalon, cerebellum, Sy5y_exp1_D0, occipital_lobe, frontal_cortex, Sy5y_exp1_D2, parietal_lobe, temporal_lobe, SY5Y_exp2_D4, WAS2, platelets	ANNOTATED, CDS, coding, INTERNAL, OVCODE, OVEXON	Jeck2013, Maass2017, Rybak2015, Salzman2013	0.941585	1.92064	0.459299	0.737096	7.34336	6.40178	0	82.2622	139.033	179.43	0	0	191.248	0	301.557	310.555
hsa_circ_0025612	chr12:22637630-22659753:-	KIAA0528	circBase	512	4	22123	chr12:22635677-22637630|chr12:22659753-22666227	ENSG00000111731.12_3	ENST00000333957.8_1	NM_014802	Hsmm, Bj, A549, diencephalon, cerebellum, occipital_lobe, frontal_cortex, parietal_lobe, temporal_lobe	ANNOTATED, CDS, coding, INTERNAL, OVCODE, OVEXON	Rybak2015, Salzman2013	-1.67653	0.312834	0.0597892	0.300927	7.5224	9.19892	255.946	466.152	231.721	1184.24	769.643	478.455	0	0	376.946	0
hsa_circ_0008664	chr12:22796696-22826594:+	ETNK1	circBase	789	5	29898	chr12:22778520-22796696|chr12:22826594-22837416	ENSG00000139163.15_4	ENST00000266517.8_4	NM_018638	Hs68_RNase, Hs68_control, Nhek, K562, Huvec, Hepg2, Helas3, H1hesc, Gm12878, Bj, Ag04450, A549, Sknshra, diencephalon, cerebellum, occipital_lobe, frontal_cortex, Sy5y_exp1_D2, parietal_lobe, temporal_lobe	ANNOTATED, CDS, coding, INTERNAL, OVCODE, OVEXON	Jeck2013, Rybak2015, Salzman2013	-0.0197803	0.986383	1	1	7.44701	7.46679	95.9797	109.683	185.377	143.544	329.847	239.227	0	221.7	226.168	155.278
hsa_circ_0098208	chr12:2613601-2622150:+	CACNA1C	circBase	277	2	8549	chr12:2602552-2613601|chr12:2622150-2659108	ENSG00000151067.21_3	ENST00000399641.5_1	NM_001167625	diencephalon, cerebellum, occipital_lobe, frontal_cortex, parietal_lobe, temporal_lobe	ANNOTATED, CDS, coding, INTERNAL, OVCODE, OVEXON	Rybak2015	-3.46255	0.0907125	0.00114648	0.0411141	4.89966	8.36221	63.9865	246.786	185.377	645.947	476.446	95.691	0	0	0	0
hsa_circ_0098219	chr12:26703179-26755639:-	ITPR2	circBase	1611	11	52460	chr12:26648193-26703179|chr12:26755639-26774055	ENSG00000123104.11_3	ENST00000381340.7_1	NM_002223	diencephalon, cerebellum, occipital_lobe, frontal_cortex, parietal_lobe	ANNOTATED, CDS, coding, INTERNAL, OVCODE, OVERLAPTX, OVEXON	Rybak2015	2.53921	5.81271	0.0253501	0.193854	7.88195	5.34274	63.9865	0	0	0	109.949	0	191.248	221.7	376.946	388.194
hsa_circ_0098221	chr12:26731645-26755639:-	ITPR2	circBase	1168	8	23994	chr12:26714885-26731645|chr12:26755639-26774055	ENSG00000123104.11_3	ENST00000381340.7_1	NM_002223	diencephalon, temporal_lobe	ANNOTATED, CDS, coding, INTERNAL, OVCODE, OVERLAPTX, OVEXON	Rybak2015	3.27776	9.69846	0.0187231	0.170222	7.50578	4.22803	31.9932	27.4207	0	0	0	0	0	369.499	226.168	310.555
hsa_circ_0005824	chr12:27143382-27156323:-	TM7SF3	circBase	777	5	12941	chr12:27135792-27143382|chr12:27156323-27167010	ENSG00000064115.10_3	ENST00000343028.8_3	NM_016551	Hs68_RNase, Hs68_control, diencephalon, cerebellum, occipital_lobe, frontal_cortex, parietal_lobe, temporal_lobe	ANNOTATED, CDS, coding, INTERNAL, OVCODE, OVEXON	Jeck2013, Rybak2015	-0.042597	0.970906	1	1	6.63185	6.67445	63.9865	54.8414	231.721	35.8859	109.949	47.8455	127.499	295.599	0	0
hsa_circ_0007683	chr12:27149674-27152609:-	TM7SF3	circBase	272	2	2935	chr12:27148341-27149674|chr12:27152609-27156168	ENSG00000064115.10_3	ENST00000343028.8_3	NM_016551	Hs68_RNase, Hs68_control, diencephalon, cerebellum, Sy5y_exp1_D0, occipital_lobe, frontal_cortex, Sy5y_exp1_D2, parietal_lobe, temporal_lobe, platelets	ANNOTATED, CDS, coding, INTERNAL, OVCODE, OVEXON	Jeck2013, Maass2017, Rybak2015	0.298114	1.22954	0.80433	0.948248	7.75034	7.45223	159.966	54.8414	324.409	215.316	109.949	95.691	0	369.499	301.557	310.555
hsa_circ_0009009	chr12:27521194-27523163:+	ARNTL2	circBase	253	2	1969	chr12:27486036-27521194|chr12:27523163-27533179	ENSG00000029153.14_3	ENST00000311001.9_1	NM_020183	Hs68_RNase, Hs68_control, Nhek, Huvec, Gm12878, Bj, Ag04450, Sknshra, diencephalon, cerebellum, occipital_lobe, frontal_cortex, parietal_lobe, temporal_lobe, platelets	ANNOTATED, CDS, coding, INTERNAL, OVCODE, OVEXON	Jeck2013, Maass2017, Rybak2015, Salzman2013	0.583312	1.49828	0.621425	0.839981	8.11796	7.53465	127.973	82.2622	185.377	215.316	293.197	1148.29	0	147.8	0	0
hsa_circ_0000384	chr12:27867712-27877119:+	MRPS35	circBase	410	4	9407	chr12:27863888-27867712|chr12:27877119-27888379	ENSG00000061794.12_3	ENST00000081029.7_1	NM_001190864	HEK293, cd_19, Hs68_RNase, Hs68_control, Nhek, K562, Huvec, H1hesc, Gm12878, Bj, Ag04450, A549, Sknshra, Mcf7, diencephalon, cerebellum, occipital_lobe, frontal_cortex, parietal_lobe, temporal_lobe, WAS2, osteocytes, vena_cava, platelets	ANNOTATED, CDS, coding, INTERNAL, OVCODE, OVEXON	Jeck2013, Maass2017, Memczak2013, Rybak2015, Salzman2013	-0.382069	0.767336	0.592035	0.821725	9.07377	9.45584	991.79	493.573	880.539	538.289	586.395	526.3	191.248	517.299	980.06	465.833
hsa_circ_0007723	chr12:28458581-28460682:+	CCDC91	circBase	467	3	2101	chr12:28457644-28458581|chr12:28460682-28515370	ENSG00000123106.10_3	ENST00000535520.5_1	NM_018318	Hs68_RNase, Hs68_control, Nhek, K562, Hepg2, Gm12878, Bj, Sknshra, SY5Y_exp2_D0, diencephalon, Sy5y_exp1_D4, cerebellum, Sy5y_exp1_D0, occipital_lobe, frontal_cortex, Sy5y_exp1_D2, parietal_lobe, temporal_lobe, SY5Y_exp2_D4, muscle, platelets	ANNOTATED, CDS, coding, INTERNAL, OVCODE, OVEXON	Jeck2013, Maass2017, Rybak2015, Salzman2013	-0.642178	0.640745	0.319015	0.62354	9.67259	10.3148	959.797	959.725	509.786	2547.9	1356.04	1243.98	1019.99	369.499	452.335	931.665
hsa_circ_0008250	chr12:28458581-28544344:+	CCDC91	circBase	653	5	85763	chr12:28457644-28458581|chr12:28544344-28603093	ENSG00000123106.10_3	ENST00000535520.5_1	NM_018318	Hs68_RNase, Hs68_control, K562, Hepg2, Helas3, H1hesc, Gm12878, Ag04450, A549, Sknshra, diencephalon, cerebellum, occipital_lobe, frontal_cortex, Sy5y_exp1_D2, parietal_lobe, temporal_lobe, cortex, serum	ANNOTATED, CDS, coding, INTERNAL, OVCODE, OVEXON	Jeck2013, Maass2017, Rybak2015, Salzman2013	-0.818124	0.567179	0.40356	0.700156	7.48531	8.30344	127.973	137.104	92.6884	717.719	476.446	239.227	382.497	221.7	0	0
hsa_circ_0000374	chr12:2929251-2930958:+	ITFG2	circBase	542	5	1707	chr12:2927443-2929251|chr12:2930958-2931959	ENSG00000111203.11_3	ENST00000228799.6_1	NM_018463	cd_19, Nhek, K562, Hsmm, Hepg2, Helas3, H1hesc, Gm12878, Bj, Ag04450, A549, Sknshra, SY5Y_exp2_D0, diencephalon, cerebellum, occipital_lobe, frontal_cortex, parietal_lobe, temporal_lobe	ANNOTATED, CDS, coding, INTERNAL	Memczak2013, Rybak2015, Salzman2013	0.473551	1.38852	0.626577	0.840863	8.08699	7.61343	223.953	329.049	324.409	35.8859	36.6497	47.8455	828.743	147.8	150.778	155.278
hsa_circ_0008445	chr12:31595708-31600703:-	DENND5B	circBase	383	2	4995	chr12:31586182-31595708|chr12:31600703-31604873	ENSG00000170456.15_3	ENST00000389082.9_1	NM_144973	Hs68_RNase, Hs68_control, K562, Huvec, Gm12878, Ag04450, A549, Sknshra, diencephalon, cerebellum, Sy5y_exp1_D0, occipital_lobe, frontal_cortex, Sy5y_exp1_D2, parietal_lobe, temporal_lobe	ANNOTATED, CDS, coding, INTERNAL, OVCODE, OVEXON	Jeck2013, Rybak2015, Salzman2013	-1.03757	0.487148	0.218727	0.544077	7.7983	8.83587	479.898	877.463	231.721	502.403	146.599	478.455	127.499	443.399	0	0
hsa_circ_0025830	chr12:31604873-31648853:-	DENND5B	circBase	1502	4	43980	chr12:31600703-31604873|chr12:31648853-31743639	ENSG00000170456.15_3	ENST00000389082.9_1	NM_144973	Hepg2, Ag04450, A549, diencephalon, cerebellum, occipital_lobe, frontal_cortex, parietal_lobe, temporal_lobe	ANNOTATED, CDS, coding, INTERNAL, OVCODE, OVERLAPTX, OVEXON	Rybak2015, Salzman2013	-1.21784	0.429926	0.204196	0.528452	6.54675	7.76459	223.953	219.366	370.753	179.43	73.2994	143.536	127.499	147.8	0	0
hsa_circ_0025841	chr12:32480394-32481489:+	BICD1	circBase	1095	1	1095	chr12:32459056-32480394|chr12:32481489-32487449	ENSG00000151746.13_3	ENST00000548411.5_1	NM_001714	Nhek, K562, Huvec, H1hesc, Gm12878, Ag04450, Sknshra, Mcf7, diencephalon, cerebellum, Sy5y_exp1_D0, occipital_lobe, frontal_cortex, Sy5y_exp1_D2, parietal_lobe, SY5Y_exp2_D8, temporal_lobe	ANNOTATED, CDS, coding, INTERNAL, OVCODE, OVEXON	Rybak2015, Salzman2013	-0.788561	0.578921	0.326439	0.630415	8.08318	8.87174	863.817	658.097	46.3442	538.289	183.248	382.764	254.998	295.599	376.946	0
hsa_circ_0025843	chr12:32751430-32764217:+	FGD4	circBase	738	6	12787	chr12:32735401-32751430|chr12:32764217-32772631	ENSG00000139132.14_3	ENST00000534526.6_1	NM_139241	Ag04450, Sknshra, diencephalon, cerebellum, occipital_lobe, frontal_cortex, Sy5y_exp1_D2, parietal_lobe, temporal_lobe, EPC, adipose, vena_cava, HUAEC, neutophils, platelets	ANNOTATED, CDS, coding, INTERNAL, OVCODE, OVERLAPTX, OVEXON	Maass2017, Rybak2015, Salzman2013	1.17045	2.25082	0.132583	0.429099	8.35327	7.18282	223.953	82.2622	139.033	71.7719	183.248	191.382	446.246	369.499	376.946	232.916
hsa_circ_0000390	chr12:32760890-32764217:+	FGD4	circBase	345	3	3327	chr12:32755251-32760890|chr12:32764217-32772631	ENSG00000139132.14_3	ENST00000534526.6_1	NM_139241	cd_19, neutr, H1hesc, diencephalon, cerebellum, occipital_lobe, frontal_cortex, parietal_lobe, temporal_lobe, neutophils, platelets	ANNOTATED, CDS, coding, INTERNAL	Maass2017, Memczak2013, Rybak2015, Salzman2013	1.51705	2.86206	0.171267	0.485509	7.7455	6.22845	63.9865	27.4207	0	179.43	73.2994	287.073	0	73.8999	452.335	232.916
hsa_circ_0007918	chr12:40422102-40442012:-	SLC2A13	circBase	369	2	19910	chr12:40345167-40422102|chr12:40442012-40499054	ENSG00000151229.12_3	ENST00000280871.8_1	NM_052885	Hs68_RNase, Hs68_control, K562, Hepg2, H1hesc, Gm12878, diencephalon, cerebellum, occipital_lobe, frontal_cortex, parietal_lobe, temporal_lobe, cortex	ANNOTATED, CDS, coding, INTERNAL, OVCODE, OVEXON	Jeck2013, Maass2017, Rybak2015, Salzman2013	-0.120818	0.919666	0.901702	0.988553	7.81479	7.93561	63.9865	54.8414	139.033	430.631	513.096	95.691	764.993	0	226.168	0
hsa_circ_0098537	chr12:41408029-41423021:+	CNTN1	circBase	867	6	14992	chr12:41387071-41408029|chr12:41423021-41463760	ENSG00000018236.14_4	ENST00000551295.6_1	ENST00000551295.2	diencephalon, cerebellum, occipital_lobe, frontal_cortex, parietal_lobe, temporal_lobe	ANNOTATED, CDS, coding, INTERNAL, OVCODE, OVEXON	Rybak2015	-1.86669	0.274201	0.0845356	0.356189	6.24216	8.10885	95.9797	274.207	370.753	215.316	403.147	0	63.7494	0	0	310.555
hsa_circ_0098551	chr12:42592937-42604421:-	YAF2	circBase	172	2	11484	chr12:42566011-42592937|chr12:42604421-42631400	ENSG00000015153.14_2	ENST00000547351.5_1	NR_034000	diencephalon, parietal_lobe	ALT_ACCEPTOR, INTERNAL, intronic, ncRNA, OVCODE, OVEXON	Rybak2015	-1.53204	0.345788	0.0877753	0.358043	7.33543	8.86747	127.973	164.524	648.819	574.175	806.293	574.146	0	147.8	0	0
hsa_circ_0004502	chr12:42604156-42604421:-	YAF2	circBase	172	2	265	chr12:42555567-42604156|chr12:42604421-42629415	ENSG00000015153.14_2	ENST00000551268.5_1	NM_001190979	Hs68_RNase, Hs68_control, diencephalon, cerebellum, occipital_lobe, frontal_cortex, parietal_lobe, temporal_lobe, vena_cava, HUAEC	ALT_DONOR, CDS, coding, INTERNAL, intronic, OVCODE, OVEXON	Jeck2013, Maass2017, Rybak2015	-0.591874	0.66348	0.573718	0.808151	8.0708	8.66268	927.804	658.097	139.033	0	256.548	621.991	0	591.199	0	77.6388
hsa_circ_0000392	chr12:42604156-42604482:-	YAF2	circBase	233	2	326	chr12:42593037-42604156|chr12:42604482-42631400	ENSG00000015153.14_2	ENST00000546726.5_1	NM_001190979	neutr, Hs68_RNase, Hs68_control, diencephalon, Sy5y_exp1_D4, cerebellum, Sy5y_exp1_D0, occipital_lobe, frontal_cortex, Sy5y_exp1_D2, parietal_lobe, SY5Y_exp2_D8, temporal_lobe, SY5Y_exp2_D4, WAS2, ada_scid, vena_cava	ALT_ACCEPTOR, ALT_DONOR, CDS, coding, INTERNAL, intronic, OVCODE, OVEXON	Jeck2013, Maass2017, Memczak2013, Rybak2015	-0.251034	0.840294	0.701321	0.887652	10.4783	10.7293	2975.37	2934.02	1112.26	933.034	476.446	1435.36	764.993	2069.2	904.671	1940.97
hsa_circ_0004815	chr12:42745686-42792796:+	PPHLN1	circBase	837	7	47110	chr12:42729776-42745686|chr12:42792796-42835116	ENSG00000134283.17_3	ENST00000549190.5_1	NM_016488	Hs68_RNase, Hs68_control, K562, Gm12878, A549, Sknshra, diencephalon, Sy5y_exp1_D4, cerebellum, occipital_lobe, frontal_cortex, Sy5y_exp1_D2, parietal_lobe, temporal_lobe, WAS2, platelets	ANNOTATED, CDS, coding, INTERNAL, OVCODE, OVEXON	Jeck2013, Maass2017, Rybak2015, Salzman2013	-0.867461	0.548111	0.244333	0.57032	8.11902	8.98648	223.953	164.524	463.442	753.605	916.242	526.3	127.499	295.599	226.168	155.278
hsa_circ_0098568	chr12:44136259-44142412:-	PUS7L	circBase	452	3	6153	chr12:44132194-44136259|chr12:44142412-44148138	ENSG00000129317.14_2	ENST00000344862.9_1	ENST00000416848.2	diencephalon, cerebellum, occipital_lobe, frontal_cortex, parietal_lobe, temporal_lobe	ANNOTATED, CDS, coding, INTERNAL, OVCODE, OVEXON	Rybak2015	-2.31263	0.201293	0.045319	0.261191	5.54508	7.85771	351.926	54.8414	185.377	358.859	183.248	0	63.7494	0	0	155.278
hsa_circ_0002881	chr12:459786-463400:-	KDM5A	circBase	438	3	3614	chr12:443588-459786|chr12:463400-464323	ENSG00000073614.12_3	ENST00000399788.6_1	NM_001042603	Hs68_RNase, Hs68_control, K562, Gm12878, Ag04450, Sknshra, diencephalon, cerebellum, occipital_lobe, frontal_cortex, parietal_lobe, temporal_lobe	ANNOTATED, CDS, coding, INTERNAL, OVCODE, OVEXON	Jeck2013, Rybak2015, Salzman2013	-0.0561942	0.961798	1	1	8.18116	8.23735	351.926	246.786	417.098	287.087	183.248	0	382.497	295.599	0	776.388
hsa_circ_0024946	chr12:459786-465703:-	KDM5A	circBase	636	5	5917	chr12:443588-459786|chr12:465703-472128	ENSG00000073614.12_3	ENST00000399788.6_1	NM_001042603	H1hesc, diencephalon, cerebellum, occipital_lobe, frontal_cortex, Sy5y_exp1_D2, parietal_lobe, temporal_lobe	ANNOTATED, CDS, coding, INTERNAL, OVCODE, OVEXON	Rybak2015, Salzman2013	-1.15281	0.449747	0.275767	0.591851	6.8767	8.02951	287.939	603.256	0	251.202	109.949	0	127.499	147.8	150.778	155.278
hsa_circ_0025967	chr12:46319924-46322642:-	SCAF11	circBase	2718	1	2718	chr12:46318857-46319924|chr12:46322642-46325288	ENSG00000139218.17_4	ENST00000369367.7_3	NM_004719	Nhek, K562, Huvec, Hepg2, Helas3, H1hesc, Gm12878, Bj, Ag04450, A549, Sknshra, diencephalon, Sy5y_exp1_D4, cerebellum, occipital_lobe, frontal_cortex, Sy5y_exp1_D2, parietal_lobe, temporal_lobe, WAS2, adipose, vena_cava	ANNOTATED, CDS, coding, INTERNAL, OVCODE, OVEXON	Maass2017, Rybak2015, Salzman2013	-1.15253	0.449836	0.171301	0.485509	7.64107	8.7936	415.912	1014.57	231.721	430.631	73.2994	191.382	318.747	295.599	0	155.278
hsa_circ_0000396	chr12:46622935-46637097:-	SLC38A1	circBase	522	4	14162	chr12:46602910-46622935|chr12:46637097-46662308	ENSG00000111371.15_3	ENST00000398637.9_1	NM_030674	HEK293, cd_19, Nhek, K562, Huvec, Hsmm, Hepg2, Helas3, H1hesc, Gm12878, Bj, Ag04450, A549, Sknshra, Mcf7, SY5Y_exp2_D0, diencephalon, Sy5y_exp1_D4, cerebellum, Sy5y_exp1_D0, occipital_lobe, frontal_cortex, Sy5y_exp1_D2, parietal_lobe, temporal_lobe, SY5Y_exp2_D4, WAS2, ada_scid, osteocytes, VSMC, vena_cava, LCL	ANNOTATED, CDS, coding, INTERNAL, UTR5	Maass2017, Memczak2013, Rybak2015, Salzman2013	0.257895	1.19573	0.697256	0.885516	9.89209	9.6342	1023.78	767.78	695.163	574.175	879.592	2009.51	318.747	960.698	527.725	854.026
hsa_circ_0000398	chr12:46633461-46637097:-	SLC38A1	circBase	330	2	3636	chr12:46623422-46633461|chr12:46637097-46662308	ENSG00000111371.15_3	ENST00000398637.9_1	NM_030674	cd_19, Hs68_RNase, Hs68_control, Nhek, K562, Hepg2, Helas3, H1hesc, Gm12878, Bj, Ag04450, A549, Mcf7, diencephalon, Sy5y_exp1_D4, cerebellum, Sy5y_exp1_D0, occipital_lobe, frontal_cortex, Sy5y_exp1_D2, parietal_lobe, temporal_lobe, WAS2, vena_cava	ANNOTATED, CDS, coding, INTERNAL, OVCODE, OVEXON, UTR5	Jeck2013, Maass2017, Memczak2013, Rybak2015, Salzman2013	-1.17522	0.442815	0.208879	0.532491	7.07317	8.24839	383.919	411.311	139.033	251.202	293.197	191.382	0	221.7	226.168	0
hsa_circ_0003770	chr12:49333437-49334971:-	ARF3	circBase	477	3	1534	chr12:49297691-49333437|chr12:49334971-49351092	ENSG00000272822.1_4	ENST00000398092.4_1	NM_001659	Hs68_RNase, Hs68_control, K562, Huvec, Hepg2, Helas3, Bj, A549, Sknshra, diencephalon, cerebellum, occipital_lobe, frontal_cortex, parietal_lobe, temporal_lobe	ANNOTATED, CDS, coding, INTERNAL, OVCODE, OVEXON, UTR5	Jeck2013, Rybak2015, Salzman2013	-1.85964	0.275545	0.11305	0.398764	6.56566	8.4253	0	164.524	0	645.947	879.592	143.536	0	295.599	0	0
hsa_circ_0006535	chr12:50488219-50490755:+	SMARCD1	circBase	259	2	2536	chr12:50484373-50488219|chr12:50490755-50492496	ENSG00000066117.14_2	ENST00000394963.8_1	NM_003076	Hs68_RNase, Hs68_control, Nhek, K562, Hepg2, Helas3, H1hesc, Gm12878, Ag04450, A549, diencephalon, Sy5y_exp1_D4, cerebellum, occipital_lobe, frontal_cortex, parietal_lobe, temporal_lobe	ANNOTATED, CDS, coding, INTERNAL, OVCODE, OVEXON	Jeck2013, Rybak2015, Salzman2013	0.37955	1.30094	0.744799	0.912706	6.6294	6.24985	63.9865	54.8414	92.6884	71.7719	73.2994	95.691	0	73.8999	150.778	155.278
hsa_circ_0098746	chr12:51173922-51203372:+	ATF1	circBase	334	3	29450	chr12:51157524-51173922|chr12:51203372-51207792	ENSG00000123268.8_3	ENST00000552510.5_3	NM_005171	diencephalon, cerebellum, occipital_lobe, frontal_cortex, parietal_lobe, temporal_lobe	ANNOTATED, CDS, coding, INTERNAL, OVCODE, OVEXON, UTR5	Rybak2015	0.995064	1.99317	0.248404	0.575304	8.49952	7.50445	159.966	301.628	0	251.202	146.599	717.682	127.499	369.499	226.168	310.555
hsa_circ_0008802	chr12:51402258-51404549:-	SLC11A2	circBase	221	2	2291	chr12:51399219-51402258|chr12:51404549-51420092	ENSG00000110911.14_3	ENST00000262051.11_1	NM_001174129	Hs68_RNase, Hs68_control, Nhek, K562, Huvec, Hepg2, Helas3, H1hesc, Gm12878, Bj, Ag04450, A549, Sknshra, Mcf7, diencephalon, cerebellum, occipital_lobe, frontal_cortex, parietal_lobe, temporal_lobe	ANNOTATED, CDS, coding, INTERNAL, OVCODE, OVEXON, UTR5	Jeck2013, Rybak2015, Salzman2013	1.79613	3.47287	0.10619	0.387264	8.5839	6.78778	0	82.2622	278.065	179.43	0	95.691	254.998	1330.2	226.168	0
hsa_circ_0004538	chr12:51467605-51467865:-	CSRNP2	circBase	260	1	260	chr12:51461752-51467605|chr12:51467865-51470193	ENSG00000110925.6_2	ENST00000228515.5_1	NR_045072	Hs68_RNase, Hs68_control, K562, Hepg2, H1hesc, Gm12878, Bj, Ag04450, Sknshra, Mcf7, diencephalon, cerebellum, occipital_lobe, frontal_cortex, parietal_lobe, temporal_lobe, cortex, vena_cava	ANNOTATED, INTERNAL, ncRNA, OVCODE, OVEXON	Jeck2013, Maass2017, Rybak2015, Salzman2013	0.154805	1.11327	0.877431	0.976731	8.66814	8.51333	127.973	466.152	370.753	394.745	439.796	526.3	127.499	886.798	226.168	232.916
hsa_circ_0098779	chr12:52077957-52082880:+	SCN8A	circBase	430	4	4923	chr12:52056877-52077957|chr12:52082880-52093353	ENSG00000196876.9	ENST00000550891.1	ENST00000550891.1	diencephalon, cerebellum, occipital_lobe, frontal_cortex, parietal_lobe, temporal_lobe	ANNOTATED, CDS, coding, INTERNAL, OVCODE, OVEXON	Rybak2015	-1.76857	0.293499	0.137065	0.432496	6.26665	8.03523	127.973	246.786	0	681.833	219.898	0	0	0	301.557	77.6388
hsa_circ_0002588	chr12:56956200-56965639:+	RBMS2	circBase	476	4	9439	chr12:56915873-56956200|chr12:56965639-56974967	ENSG00000076067.12_2	ENST00000262031.9_2	NM_002898	Hs68_RNase, Hs68_control, Nhek, K562, Huvec, Hsmm, Hepg2, Helas3, H1hesc, Bj, Ag04450, A549, Nhlf, Sknshra, Mcf7	ANNOTATED, CDS, coding, INTERNAL, OVCODE, OVEXON	Jeck2013, Salzman2013	1.6868	3.21943	0.153937	0.453728	7.91119	6.22438	31.9932	0	185.377	107.658	36.6497	0	0	665.099	150.778	388.194
hsa_circ_0000412	chr12:58340777-58347472:+	XRCC6BP1	circBase	304	3	6695	chr12:58339456-58340777|chr12:58347472-58350469	ENSG00000166896.7_3	ENST00000300145.3_1	NM_033276	cd_19, neutr, Hs68_RNase, Hs68_control, diencephalon, cerebellum, occipital_lobe, frontal_cortex, parietal_lobe, temporal_lobe, adipose, platelets	ANNOTATED, CDS, coding, INTERNAL, OVCODE, OVEXON	Jeck2013, Maass2017, Memczak2013, Rybak2015	1.6148	3.06269	0.211034	0.534206	7.55161	5.93681	0	191.945	0	0	73.2994	0	318.747	73.8999	527.725	0
hsa_circ_0000375	chr12:6657590-6657991:-	IFFO1	circBase	279	2	401	chr12:6657326-6657590|chr12:6657991-6658641	ENSG00000010295.19_3	ENST00000436152.6_1	NM_080730	cd_34, Hs68_RNase, Hs68_control, Bj, Ag04450, A549	ANNOTATED, CDS, coding, INTERNAL, ncRNA, OVCODE, OVEXON	Jeck2013, Memczak2013, Salzman2013	2.13669	4.39751	0.18913	0.510275	7.24814	5.11145	0	0	0	0	146.599	0	0	295.599	452.335	0
hsa_circ_0000417	chr12:69644908-69656342:+	CPSF6	circBase	1599	8	11434	chr12:69633486-69644908|chr12:69656342-69663291	ENSG00000111605.16_2	ENST00000435070.6_1	NM_007007	HEK293, cd_19, K562, Huvec, Hepg2, Helas3, H1hesc, Gm12878, Ag04450, A549, Sknshra, Mcf7, SY5Y_exp2_D0, diencephalon, Sy5y_exp1_D4, cerebellum, Sy5y_exp1_D0, occipital_lobe, frontal_cortex, Sy5y_exp1_D2, parietal_lobe, SY5Y_exp2_D8, temporal_lobe, SY5Y_exp2_D4, cortex, platelets	ANNOTATED, CDS, coding, INTERNAL, UTR3	Maass2017, Memczak2013, Rybak2015, Salzman2013	-0.484454	0.714768	0.43672	0.719598	10.1573	10.6418	1631.65	1535.56	1158.6	1686.64	1942.43	1531.06	2358.73	665.099	226.168	854.026
hsa_circ_0000418	chr12:69983264-69985939:+	CCT2	circBase	304	2	2675	chr12:69982042-69983264|chr12:69985939-69986755	ENSG00000166226.12_2	ENST00000299300.10_1	NM_001198842	cd_34, Hs68_RNase, Hs68_control, K562, SY5Y_exp2_D0, diencephalon, Sy5y_exp1_D4, cerebellum, Sy5y_exp1_D0, occipital_lobe, frontal_cortex, Sy5y_exp1_D2, parietal_lobe, temporal_lobe, WAS2, adipose, platelets	ANNOTATED, CDS, coding, INTERNAL, OVCODE, OVEXON	Jeck2013, Maass2017, Memczak2013, Rybak2015, Salzman2013	0.942948	1.92245	0.303005	0.610265	9.22123	8.27828	287.939	850.042	0	358.859	0	47.8455	1338.74	591.199	678.503	310.555
hsa_circ_0002940	chr12:69983264-69987393:+	CCT2	circBase	536	4	4129	chr12:69982042-69983264|chr12:69987393-69990935	ENSG00000166226.12_2	ENST00000299300.10_1	NM_001198842	Hs68_RNase, Hs68_control, Nhek, K562, Huvec, Hepg2, Helas3, H1hesc, Gm12878, Bj, Ag04450, A549, Sknshra, Mcf7, diencephalon, Sy5y_exp1_D4, cerebellum, Sy5y_exp1_D0, occipital_lobe, frontal_cortex, Sy5y_exp1_D2, parietal_lobe, temporal_lobe, chondrocytes, WAS2, platelets	ANNOTATED, CDS, coding, INTERNAL, OVCODE, OVEXON	Jeck2013, Maass2017, Rybak2015, Salzman2013	-1.01823	0.493723	0.223107	0.548279	8.15925	9.17748	1087.77	767.78	231.721	394.745	366.497	47.8455	828.743	369.499	0	155.278
hsa_circ_0099132	chr12:70149163-70150443:+	RAB3IP	circBase	535	2	1280	chr12:70132811-70149163|chr12:70150443-70178499	ENSG00000127328.21_3	ENST00000247833.11_2	ENST00000550536.1	diencephalon, cerebellum, Sy5y_exp1_D0, occipital_lobe, frontal_cortex, parietal_lobe, temporal_lobe	ANNOTATED, CDS, coding, INTERNAL, OVCODE, OVEXON	Rybak2015	0.297937	1.22938	0.742091	0.910683	7.41824	7.1203	127.973	219.366	92.6884	143.544	73.2994	47.8455	191.248	147.8	75.3892	388.194
hsa_circ_0000419	chr12:70193988-70195501:+	RAB3IP	circBase	242	2	1513	chr12:70189124-70193988|chr12:70195501-70206557	ENSG00000127328.21_3	ENST00000247833.11_2	NM_175623	neutr, Hs68_RNase, Hs68_control, Nhek, K562, Huvec, Hepg2, Helas3, H1hesc, Gm12878, Bj, Ag04450, A549, Sknshra, SY5Y_exp2_D0, diencephalon, Sy5y_exp1_D4, cerebellum, Sy5y_exp1_D0, occipital_lobe, frontal_cortex, Sy5y_exp1_D2, parietal_lobe, SY5Y_exp2_D8, temporal_lobe, SY5Y_exp2_D4, EPC, WAS2, ada_scid, adipose, decidua, VSMC, vena_cava, right_atrium, umbilical_cord, muscle, LCL, HUAEC, neutophil…	ANNOTATED, CDS, coding, INTERNAL, OVCODE, OVEXON	Jeck2013, Maass2017, Memczak2013, Rybak2015, Salzman2013	1.14678	2.21419	0.0864508	0.356976	12.3804	11.2337	3711.21	4908.31	2131.83	466.517	769.643	1722.44	5163.7	8941.88	6257.31	4580.69
hsa_circ_0007127	chr12:70671911-70704797:+	CNOT2	circBase	266	2	32886	chr12:70637260-70671911|chr12:70704797-70713077	ENSG00000111596.11_2	ENST00000552231.5_1	NR_037615	Hs68_RNase, Hs68_control, K562, Hepg2, Helas3, H1hesc, Ag04450, A549, Sknshra, SY5Y_exp2_D0, diencephalon, cerebellum, Sy5y_exp1_D0, occipital_lobe, frontal_cortex, Sy5y_exp1_D2, parietal_lobe, temporal_lobe	ANNOTATED, INTERNAL, ncRNA, OVCODE, OVEXON	Jeck2013, Rybak2015, Salzman2013	-0.193277	0.874617	0.86574	0.969358	7.50513	7.6984	351.926	246.786	185.377	35.8859	183.248	334.918	0	221.7	75.3892	232.916
hsa_circ_0027545	chr12:70671911-70713144:+	CNOT2	circBase	333	3	41233	chr12:70637260-70671911|chr12:70713144-70723202	ENSG00000111596.11_2	ENST00000552231.5_1	NR_037615	K562, Sknshra, diencephalon, cerebellum, occipital_lobe, frontal_cortex, Sy5y_exp1_D2, parietal_lobe, SY5Y_exp2_D8, temporal_lobe	ANNOTATED, INTERNAL, ncRNA, OVCODE, OVEXON	Rybak2015, Salzman2013	2.5136	5.71043	0.026749	0.195722	8.31583	5.80224	0	54.8414	92.6884	0	109.949	239.227	0	1108.5	150.778	77.6388
hsa_circ_0099155	chr12:71077906-71095103:-	PTPRR	circBase	490	4	17197	chr12:71056385-71077906|chr12:71095103-71139597	ENSG00000153233.12_3	ENST00000440835.6_1	ENST00000283228.2	diencephalon, cerebellum, occipital_lobe, frontal_cortex, parietal_lobe	ANNOTATED, CDS, coding, INTERNAL, OVCODE, OVEXON	Rybak2015	-1.80112	0.286953	0.0569251	0.294537	6.19778	7.99889	319.932	164.524	185.377	287.087	293.197	287.073	0	0	0	0
hsa_circ_0099196	chr12:72955944-73015531:+	TRHDE	circBase	887	8	59587	chr12:72936136-72955944|chr12:73015531-73046101	ENSG00000072657.8_3	ENST00000261180.8_1	ENST00000261180.4	diencephalon, cerebellum, occipital_lobe, frontal_cortex, parietal_lobe, temporal_lobe	ANNOTATED, CDS, coding, INTERNAL, OVCODE, OVERLAPTX, OVEXON	Rybak2015	-2.49074	0.177915	0.0341032	0.220136	5.33161	7.82235	255.946	191.945	0	574.175	73.2994	143.536	0	0	0	0
hsa_circ_0002419	chr12:78443772-78452895:+	NAV3	circBase	613	3	9123	chr12:78415642-78443772|chr12:78452895-78510551	ENSG00000067798.14_3	ENST00000536525.6_1	NM_014903	Hs68_RNase, Hs68_control, Nhek, Huvec, Bj, Ag04450, diencephalon, cerebellum, occipital_lobe, frontal_cortex, parietal_lobe, temporal_lobe	ANNOTATED, CDS, coding, INTERNAL, OVCODE, OVEXON	Jeck2013, Rybak2015, Salzman2013	-0.907061	0.53327	0.299207	0.608308	7.20435	8.11141	287.939	164.524	139.033	394.745	366.497	382.764	127.499	0	0	155.278
hsa_circ_0099287	chr12:79679566-79693331:+	SYT1	circBase	644	4	13765	chr12:79611465-79679566|chr12:79693331-79747281	ENSG00000067715.13_3	ENST00000393240.7_1	NM_001135805	diencephalon, cerebellum, occipital_lobe, frontal_cortex, parietal_lobe, SY5Y_exp2_D8, temporal_lobe, SY5Y_exp2_D4	ANNOTATED, CDS, coding, INTERNAL, OVCODE, OVEXON	Rybak2015	-3.66064	0.0790748	0.00206706	0.0539107	4.1777	7.83834	191.959	246.786	92.6884	430.631	146.599	47.8455	0	0	0	0
hsa_circ_0099295	chr12:80187642-80215970:-	PPP1R12A	circBase	1857	14	28328	chr12:80184263-80187642|chr12:80215970-80222099	ENSG00000058272.16_3	ENST00000261207.9_2	NM_002480	diencephalon, cerebellum, occipital_lobe, frontal_cortex, parietal_lobe, temporal_lobe	ANNOTATED, CDS, coding, INTERNAL, OVCODE, OVERLAPTX, OVEXON	Rybak2015	-0.198096	0.8717	0.807866	0.948248	8.54381	8.7419	287.939	383.89	92.6884	681.833	659.694	1100.45	0	147.8	0	543.471
hsa_circ_0099310	chr12:81503338-81545875:+	ACSS3	circBase	787	6	42537	chr12:81472210-81503338|chr12:81545875-81568566	ENSG00000111058.7_3	ENST00000548058.5_2	ENST00000548058.1	parietal_lobe, temporal_lobe	ANNOTATED, CDS, coding, INTERNAL, OVCODE, OVERLAPTX, OVEXON	Rybak2015	2.27282	4.83268	0.119414	0.409658	6.53248	4.25966	63.9865	0	0	0	0	0	0	147.8	75.3892	232.916
hsa_circ_0002886	chr12:83250788-83251359:+	TMTC2	circBase	571	1	571	chr12:83081448-83250788|chr12:83251359-83289596	ENSG00000179104.8_2	ENST00000551915.5_1	NM_152588	Hs68_RNase, Hs68_control, Nhek, Huvec, Helas3, H1hesc, Gm12878, Bj, Ag04450, A549, Sknshra, Mcf7, diencephalon, Sy5y_exp1_D4, cerebellum, Sy5y_exp1_D0, occipital_lobe, frontal_cortex, Sy5y_exp1_D2, parietal_lobe, SY5Y_exp2_D8, temporal_lobe, WAS2	ANNOTATED, CDS, coding, INTERNAL, OVCODE, OVEXON	Jeck2013, Maass2017, Rybak2015, Salzman2013	-1.63219	0.322598	0.0218078	0.182044	8.31979	9.95198	895.81	2166.24	602.474	717.719	513.096	382.764	191.248	147.8	150.778	698.749
hsa_circ_0002375	chr12:88898935-88939642:-	KITLG	circBase	844	8	40707	chr12:88890958-88898935|chr12:88939642-88974040	ENSG00000049130.14_2	ENST00000228280.9_1	NM_000899	Hs68_RNase, Hs68_control, Ag04450, diencephalon, cerebellum, occipital_lobe, frontal_cortex, Sy5y_exp1_D2, parietal_lobe, temporal_lobe, cortex	ANNOTATED, CDS, coding, INTERNAL, OVCODE, OVEXON, UTR3	Jeck2013, Maass2017, Rybak2015, Salzman2013	-0.564422	0.676226	0.52562	0.778561	7.77137	8.33579	95.9797	191.945	139.033	502.403	659.694	239.227	0	295.599	150.778	388.194
hsa_circ_0099456	chr12:90013775-90029028:-	ATP2B1	circBase	1423	8	15253	chr12:90010816-90013775|chr12:90029028-90035934	ENSG00000070961.15_2	ENST00000359142.7_1	ENST00000428670.3	diencephalon, cerebellum, occipital_lobe, frontal_cortex, parietal_lobe, temporal_lobe	ANNOTATED, CDS, coding, INTERNAL, OVCODE, OVERLAPTX, OVEXON	Rybak2015	-1.1971	0.436153	0.12967	0.424345	8.43502	9.63212	863.817	1124.25	370.753	430.631	1136.14	909.064	63.7494	0	603.114	77.6388
hsa_circ_0007892	chr12:922807-939326:+	WNK1	circBase	552	3	16519	chr12:863490-922807|chr12:939326-966326	ENSG00000060237.16_3	ENST00000535572.5_1	NM_001184985	Hs68_RNase, Hs68_control, K562, Huvec, Hsmm, Helas3, Gm12878, Ag04450, A549, diencephalon, occipital_lobe, frontal_cortex, parietal_lobe, temporal_lobe, platelets	ANNOTATED, CDS, coding, INTERNAL, OVCODE, OVEXON	Jeck2013, Maass2017, Rybak2015, Salzman2013	0.96902	1.95751	0.416792	0.706162	7.61167	6.64265	31.9932	54.8414	139.033	71.7719	183.248	478.455	63.7494	295.599	0	77.6388
hsa_circ_0099480	chr12:93192667-93192862:-	EEA1	circBase	195	1	195	chr12:93181825-93192667|chr12:93192862-93195375	ENSG00000102189.16_2	ENST00000322349.12_1	ENST00000322349.8	diencephalon, cerebellum, Sy5y_exp1_D0, occipital_lobe, frontal_cortex, parietal_lobe, temporal_lobe	ANNOTATED, CDS, coding, INTERNAL, OVCODE, OVEXON	Rybak2015	0.987838	1.98321	0.311094	0.619309	8.77343	7.7856	255.946	438.731	0	287.087	73.2994	95.691	0	1034.6	904.671	155.278
hsa_circ_0008916	chr12:93788384-93789309:+	NUDT4	circBase	156	2	925	chr12:93772197-93788384|chr12:93789309-93792543	ENSG00000173598.13_3	ENST00000337179.9_1	NM_199040	Hs68_RNase, Hs68_control, K562, Huvec, Helas3, H1hesc, Bj, Ag04450, A549, Sknshra	ANNOTATED, CDS, coding, INTERNAL, OVCODE, OVEXON	Jeck2013, Salzman2013	1.44458	2.72183	0.336486	0.63789	7.62264	6.17806	63.9865	219.366	0	0	36.6497	0	0	147.8	829.282	0
hsa_circ_0099504	chr12:94562928-94580249:+	PLXNC1	circBase	377	3	17321	chr12:94543809-94562928|chr12:94580249-94603365	ENSG00000136040.8_2	ENST00000258526.8_1	NM_005761	diencephalon, cerebellum, occipital_lobe, frontal_cortex, parietal_lobe, temporal_lobe	ANNOTATED, CDS, coding, INTERNAL, OVCODE, OVERLAPTX, OVEXON	Rybak2015	-0.176532	0.884827	0.941842	1	7.5489	7.72543	191.959	493.573	185.377	0	146.599	0	254.998	443.399	226.168	0
hsa_circ_0099549	chr12:95602618-95605043:-	FGD6	circBase	2425	1	2425	chr12:95566520-95602618|chr12:95605043-95611000	ENSG00000180263.13_3	ENST00000343958.8_1	ENST00000343958.4	SY5Y_exp2_D0, diencephalon, Sy5y_exp1_D4, cerebellum, occipital_lobe, frontal_cortex, Sy5y_exp1_D2, parietal_lobe, temporal_lobe, SY5Y_exp2_D4	ANNOTATED, CDS, coding, INTERNAL, OVCODE, OVEXON	Rybak2015	-0.610672	0.654891	0.455408	0.732625	8.45237	9.06304	287.939	109.683	370.753	933.034	952.892	956.91	191.248	443.399	75.3892	0
hsa_circ_0099560	chr12:95650925-95690034:+	VEZT	circBase	1663	9	39109	chr12:95645847-95650925|chr12:95690034-95693940	ENSG00000028203.17_2	ENST00000436874.5_1	NR_038241	diencephalon, cerebellum, occipital_lobe, frontal_cortex, parietal_lobe, temporal_lobe	ANNOTATED, INTERNAL, ncRNA, OVCODE, OVEXON	Rybak2015	-1.30317	0.405235	0.202421	0.528102	6.98253	8.2857	447.905	383.89	0	430.631	256.548	478.455	0	73.8999	0	0
hsa_circ_0007881	chr12:96692646-96694138:-	CDK17	circBase	172	2	1492	chr12:96691499-96692646|chr12:96694138-96704829	ENSG00000059758.7_3	ENST00000261211.7_1	NM_001170464	Hs68_RNase, Hs68_control, K562, Huvec, Ag04450, diencephalon, cerebellum, occipital_lobe, frontal_cortex, parietal_lobe, chondrocytes, WAS2, adipose, decidua, neutophils, platelets	ANNOTATED, CDS, coding, INTERNAL, OVCODE, OVEXON	Jeck2013, Maass2017, Rybak2015, Salzman2013	0.417652	1.33575	0.723941	0.899266	7.85704	7.43939	543.885	137.104	0	143.544	0	239.227	0	591.199	150.778	155.278
hsa_circ_0002762	chr12:96717725-96728643:-	CDK17	circBase	312	2	10918	chr12:96707232-96717725|chr12:96728643-96793763	ENSG00000059758.7_3	ENST00000261211.7_1	NM_001170464	Hs68_RNase, Hs68_control, K562, Huvec, Hepg2, Helas3, H1hesc, Gm12878, Bj, Ag04450, A549, Sknshra, diencephalon, cerebellum, occipital_lobe, frontal_cortex, parietal_lobe, temporal_lobe, WAS2, platelets	ANNOTATED, CDS, coding, INTERNAL, OVCODE, OVEXON, UTR5	Jeck2013, Maass2017, Rybak2015, Salzman2013	0.373587	1.29557	0.712565	0.894027	8.15724	7.78365	95.9797	164.524	695.163	107.658	36.6497	143.536	0	665.099	226.168	388.194
hsa_circ_0099634	chr12:97886238-97954825:+	RMST	circBase	1314	8	68587	chr12:97859505-97886238|chr12:97954825-97957927	ENSG00000255794.7_2	ENST00000640149.1_1	ENST00000538559.2	diencephalon, cerebellum, occipital_lobe, frontal_cortex, parietal_lobe, temporal_lobe	ANNOTATED, INTERNAL, ncRNA, OVERLAPTX, OVEXON	Rybak2015	0.956093	1.94005	0.220212	0.545347	13.4629	12.5068	6622.6	4634.1	2502.59	7500.16	7806.38	10956.6	3442.47	22096.1	226.168	19720.2
hsa_circ_0099665	chr12:99145132-99225914:-	ANKS1B	circBase	894	8	80782	chr12:99129412-99145132|chr12:99225914-99288407	ENSG00000185046.18_3	ENST00000341752.11_1	NM_001204079	diencephalon, cerebellum, occipital_lobe, frontal_cortex, parietal_lobe, temporal_lobe	ANNOTATED, CDS, coding, INTERNAL, OVCODE, OVEXON, UTR5	Rybak2015	-1.84445	0.278461	0.0902907	0.360883	7.14176	8.98621	255.946	82.2622	1761.08	215.316	219.898	621.991	0	0	0	0
hsa_circ_0099668	chr12:99166819-99194903:-	ANKS1B	circBase	438	5	28084	chr12:99145300-99166819|chr12:99194903-99222951	ENSG00000185046.18_3	ENST00000341752.11_1	NM_152788	diencephalon, cerebellum, occipital_lobe, frontal_cortex, parietal_lobe, temporal_lobe	ANNOTATED, CDS, coding, INTERNAL, OVCODE, OVEXON	Rybak2015	-1.87116	0.273354	0.0193462	0.172248	7.57235	9.4435	351.926	356.469	1761.08	358.859	659.694	382.764	127.499	73.8999	0	310.555
hsa_circ_0099671	chr12:99166819-99225914:-	ANKS1B	circBase	726	7	59095	chr12:99145300-99166819|chr12:99225914-99288407	ENSG00000185046.18_3	ENST00000341752.11_1	NM_001204079	diencephalon, cerebellum, occipital_lobe, frontal_cortex, parietal_lobe, temporal_lobe	ANNOTATED, CDS, coding, INTERNAL, OVCODE, OVEXON, UTR5	Rybak2015	-2.61048	0.163744	0.0118409	0.140243	5.95686	8.56734	0	301.628	602.474	645.947	329.847	239.227	0	0	0	0
hsa_circ_0099680	chr12:99192711-99225914:-	ANKS1B	circBase	489	4	33203	chr12:99175915-99192711|chr12:99225914-99288407	ENSG00000185046.18_3	ENST00000341752.11_1	NM_001204079	diencephalon, cerebellum, occipital_lobe, frontal_cortex, parietal_lobe, temporal_lobe	ANNOTATED, CDS, coding, INTERNAL, OVCODE, OVEXON, UTR5	Rybak2015	-1.36681	0.387748	0.239728	0.565793	8.1498	9.51661	31.9932	246.786	1436.67	466.517	1465.99	1148.29	191.248	0	0	0
hsa_circ_0000500	chr13:100909848-100925600:+	PCCA	circBase	428	4	15752	chr13:100888132-100909848|chr13:100925600-100953713	ENSG00000175198.15_3	ENST00000376279.7_1	NM_001178004	cd_19, cd_34, Hs68_RNase, Hs68_control, K562, Gm12878, Mcf7, diencephalon, cerebellum, Sy5y_exp1_D0, occipital_lobe, frontal_cortex, Sy5y_exp1_D2, parietal_lobe, temporal_lobe, SY5Y_exp2_D4	ANNOTATED, CDS, coding, INTERNAL, OVCODE, OVEXON	Jeck2013, Memczak2013, Rybak2015, Salzman2013	-0.139308	0.907954	0.830788	0.956818	10.1155	10.2548	2079.56	987.146	1158.6	825.376	1026.19	621.991	2231.23	369.499	980.06	1319.86
hsa_circ_0002664	chr13:100953713-100962162:+	PCCA	circBase	364	4	8449	chr13:100925600-100953713|chr13:100962162-100982814	ENSG00000175198.15_3	ENST00000376279.7_1	NM_000282	Hs68_RNase, Hs68_control, K562, Helas3, H1hesc, Gm12878, Bj, Ag04450, A549, Sknshra, diencephalon, cerebellum, occipital_lobe, frontal_cortex, parietal_lobe, temporal_lobe	ANNOTATED, CDS, coding, INTERNAL, OVCODE, OVEXON	Jeck2013, Rybak2015, Salzman2013	-0.167946	0.890109	0.885462	0.98141	7.71158	7.87953	191.959	356.469	46.3442	466.517	73.2994	191.382	509.995	147.8	0	155.278
hsa_circ_0030763	chr13:100953713-100992513:+	PCCA	circBase	578	6	38800	chr13:100925600-100953713|chr13:100992513-101020725	ENSG00000175198.15_3	ENST00000376279.7_1	NM_000282	Ag04450, Sknshra, diencephalon, cerebellum, occipital_lobe, frontal_cortex, Sy5y_exp1_D2, parietal_lobe, temporal_lobe	ANNOTATED, CDS, coding, INTERNAL, OVCODE, OVERLAPTX, OVEXON	Rybak2015, Salzman2013	-2.47682	0.17964	0.028216	0.201253	5.56386	8.04068	319.932	520.994	139.033	71.7719	219.898	0	0	0	150.778	77.6388
hsa_circ_0099734	chr13:100953713-101020828:+	PCCA	circBase	681	7	67115	chr13:100925600-100953713|chr13:101020828-101077886	ENSG00000175198.15_3	ENST00000376279.7_1	NM_000282	diencephalon, cerebellum, occipital_lobe, frontal_cortex, Sy5y_exp1_D2, parietal_lobe, temporal_lobe	ANNOTATED, CDS, coding, INTERNAL, OVCODE, OVERLAPTX, OVEXON	Rybak2015	-1.68246	0.311551	0.0701533	0.325199	6.64222	8.32468	255.946	603.256	46.3442	394.745	256.548	239.227	191.248	0	0	0
hsa_circ_0030764	chr13:100953713-101101559:+	PCCA	circBase	834	9	147846	chr13:100925600-100953713|chr13:101101559-101179928	ENSG00000175198.15_3	ENST00000376279.7_1	NM_000282	Hepg2, Bj, Ag04450	ANNOTATED, CDS, coding, INTERNAL, OVCODE, OVERLAPTX, OVEXON	Salzman2013	-0.839126	0.558982	0.337703	0.638407	7.7752	8.61432	95.9797	137.104	370.753	825.376	513.096	382.764	127.499	0	75.3892	465.833
hsa_circ_0030788	chr13:101997616-102031004:-	NALCN	circBase	508	4	33388	chr13:101944717-101997616|chr13:102031004-102047533	ENSG00000102452.15_2	ENST00000251127.10_1	NM_052867	A549, diencephalon, cerebellum, occipital_lobe, frontal_cortex, parietal_lobe, temporal_lobe	ANNOTATED, CDS, coding, INTERNAL, OVCODE, OVEXON	Rybak2015, Salzman2013	-0.721018	0.606669	0.432741	0.718082	7.18936	7.91038	63.9865	54.8414	231.721	394.745	439.796	382.764	127.499	0	150.778	0
hsa_circ_0099761	chr13:101997616-102051516:-	NALCN	circBase	838	6	53900	chr13:101944717-101997616|chr13:102051516-102068663	ENSG00000102452.15_2	ENST00000251127.10_1	NM_052867	diencephalon, cerebellum, occipital_lobe, frontal_cortex, parietal_lobe, temporal_lobe	ANNOTATED, CDS, coding, INTERNAL, OVCODE, OVEXON, UTR5	Rybak2015	-0.852797	0.55371	0.381038	0.680961	8.65689	9.50968	63.9865	493.573	602.474	1471.32	989.542	1578.9	191.248	0	0	155.278
hsa_circ_0030883	chr13:111274562-111276626:+	CARKD	circBase	197	2	2064	chr13:111267994-111274562|chr13:111276626-111279785	ENSG00000213995.11_3	ENST00000470164.2_1	NM_018210	Nhek, K562, Huvec, Hsmm, Hepg2, Helas3, H1hesc, Gm12878, Bj, Ag04450, A549, Sknshra, diencephalon, cerebellum, Sy5y_exp1_D0, occipital_lobe, frontal_cortex, Sy5y_exp1_D2, parietal_lobe, temporal_lobe, platelets	ANNOTATED, CDS, coding, INTERNAL, OVCODE, OVEXON	Maass2017, Rybak2015, Salzman2013	-0.271833	0.828267	0.729613	0.90353	8.18579	8.45763	479.898	191.945	185.377	502.403	366.497	287.073	382.497	147.8	603.114	0
hsa_circ_0030914	chr13:111857635-111885640:+	ARHGEF7	circBase	507	4	28005	chr13:111806338-111857635|chr13:111885640-111896218	ENSG00000102606.17_3	ENST00000317133.9_2	NM_001113511	H1hesc, Gm12878, diencephalon, cerebellum, occipital_lobe, frontal_cortex, parietal_lobe, temporal_lobe, WAS2, LCL	ANNOTATED, CDS, coding, INTERNAL, OVCODE, OVEXON	Maass2017, Rybak2015, Salzman2013	-0.87986	0.54342	0.252312	0.578056	7.69874	8.5786	319.932	164.524	509.786	502.403	403.147	334.918	127.499	295.599	75.3892	155.278
hsa_circ_0000504	chr13:113170753-113181798:-	TUBGCP3	circBase	751	6	11045	chr13:113159028-113170753|chr13:113181798-113200012	ENSG00000126216.13_3	ENST00000261965.7_1	NM_006322	HEK293, cd_19, Hs68_RNase, Hs68_control, Nhek, K562, Huvec, Hepg2, Helas3, H1hesc, Gm12878, Bj, Ag04450, A549, Sknshra, Mcf7, SY5Y_exp2_D0, diencephalon, cerebellum, Sy5y_exp1_D0, occipital_lobe, frontal_cortex, Sy5y_exp1_D2, parietal_lobe, temporal_lobe, WAS2, vena_cava	ANNOTATED, CDS, coding, INTERNAL, OVCODE, OVEXON	Jeck2013, Maass2017, Memczak2013, Rybak2015, Salzman2013	-0.193854	0.874267	0.868354	0.971022	7.55806	7.75191	0	246.786	417.098	71.7719	329.847	191.382	191.248	147.8	226.168	155.278
hsa_circ_0004096	chr13:114806475-114839312:-	RASA3	circBase	317	3	32837	chr13:114795363-114806475|chr13:114839312-114897909	ENSG00000185989.10_3	ENST00000334062.7_1	NM_007368	Hs68_RNase, Hs68_control, K562, Huvec, Hepg2, Helas3, H1hesc, Gm12878, Bj, Ag04450, Sknshra, Mcf7, diencephalon, cerebellum, Sy5y_exp1_D0, occipital_lobe, frontal_cortex, temporal_lobe, platelets	ANNOTATED, CDS, coding, INTERNAL, OVCODE, OVEXON	Jeck2013, Maass2017, Rybak2015, Salzman2013	1.70805	3.2672	0.120258	0.409658	7.7659	6.05785	63.9865	0	185.377	0	73.2994	95.691	0	147.8	452.335	388.194
hsa_circ_0029633	chr13:20625572-20641530:+	ZMYM2	circBase	1161	9	15958	chr13:20611049-20625572|chr13:20641530-20656155	ENSG00000121741.16_3	ENST00000610343.4_1	NM_003453	Nhek, K562, Hepg2, Helas3, Gm12878, Bj, Ag04450, A549, Sknshra, diencephalon, Sy5y_exp1_D4, cerebellum, Sy5y_exp1_D0, occipital_lobe, frontal_cortex, parietal_lobe, temporal_lobe, platelets	ANNOTATED, CDS, coding, INTERNAL, OVCODE, OVEXON	Maass2017, Rybak2015, Salzman2013	-2.58329	0.16686	0.00202132	0.0538045	6.35118	8.93447	479.898	658.097	324.409	394.745	549.745	143.536	63.7494	0	0	155.278
hsa_circ_0003285	chr13:21305979-21306260:-	N6AMT2	circBase	281	1	281	chr13:21303355-21305979|chr13:21306260-21311861	ENSG00000150456.10_3	ENST00000382758.5_1	NM_174928	Hs68_RNase, Hs68_control, Nhek, K562, Huvec, Hepg2, Helas3, Gm12878, Bj, Ag04450, A549, Sknshra, Mcf7, diencephalon, cerebellum, occipital_lobe, frontal_cortex, parietal_lobe, temporal_lobe, vena_cava, muscle	ANNOTATED, CDS, coding, INTERNAL, OVCODE, OVEXON	Jeck2013, Maass2017, Rybak2015, Salzman2013	1.21356	2.31909	0.339386	0.640567	7.07279	5.85923	0	137.104	46.3442	71.7719	0	191.382	0	295.599	0	155.278
hsa_circ_0100141	chr13:26343183-26349097:+	ATP8A2	circBase	295	2	5914	chr13:26273483-26343183|chr13:26349097-26402255	ENSG00000132932.16_2	ENST00000381655.6_1	ENST00000381655.2	diencephalon, cerebellum, occipital_lobe, frontal_cortex, parietal_lobe, temporal_lobe	ANNOTATED, CDS, coding, INTERNAL, OVCODE, OVEXON	Rybak2015	-2.51457	0.175	0.0117516	0.140243	5.70277	8.21734	255.946	383.89	46.3442	358.859	403.147	191.382	0	0	0	0
hsa_circ_0003489	chr13:26974589-26975761:+	CDK8	circBase	336	3	1172	chr13:26971362-26974589|chr13:26975761-26978092	ENSG00000132964.11_2	ENST00000536792.5_1	NM_001260	Hs68_RNase, Hs68_control, Nhek, K562, Huvec, Hepg2, Helas3, H1hesc, Gm12878, Ag04450, A549, Sknshra, Mcf7, diencephalon, cerebellum, Sy5y_exp1_D0, occipital_lobe, frontal_cortex, Sy5y_exp1_D2, parietal_lobe, SY5Y_exp2_D8, temporal_lobe, platelets	ANNOTATED, CDS, coding, INTERNAL, OVCODE, OVEXON	Jeck2013, Maass2017, Rybak2015, Salzman2013	-0.65304	0.635939	0.335361	0.636692	9.1049	9.75794	1535.68	1261.35	463.442	574.175	439.796	334.918	956.241	369.499	603.114	465.833
hsa_circ_0100165	chr13:28608023-28624359:-	FLT3	circBase	1328	10	16336	chr13:28602425-28608023|chr13:28624359-28626681	ENSG00000122025.14_2	ENST00000241453.11_1	ENST00000380982.4	diencephalon, cerebellum, frontal_cortex, temporal_lobe	ANNOTATED, CDS, coding, INTERNAL, OVCODE, OVEXON	Rybak2015	-6.45218	0.0114209	0.00617892	0.0989095	2.50164	8.95382	1151.76	1288.77	0	0	0	0	0	0	0	0
hsa_circ_0100168	chr13:28611321-28624359:-	FLT3	circBase	695	5	13038	chr13:28610180-28611321|chr13:28624359-28626681	ENSG00000122025.14_2	ENST00000241453.11_1	ENST00000380982.4	diencephalon, cerebellum, occipital_lobe, frontal_cortex, parietal_lobe, temporal_lobe	ANNOTATED, CDS, coding, INTERNAL, OVCODE, OVEXON	Rybak2015	-5.6384	0.0200758	0.00127455	0.0437256	2.50164	8.14003	575.878	712.939	0	0	73.2994	0	0	0	0	0
hsa_circ_0004372	chr13:28748408-28752072:+	PAN3	circBase	260	3	3664	chr13:28713224-28748408|chr13:28752072-28771321	ENSG00000152520.13_3	ENST00000503791.5_1	NM_175854	Hs68_RNase, Hs68_control, Nhek, K562, Hepg2, Helas3, H1hesc, Gm12878, Bj, Ag04450, A549, Sknshra, diencephalon, Sy5y_exp1_D4, cerebellum, Sy5y_exp1_D0, occipital_lobe, frontal_cortex, parietal_lobe, temporal_lobe, decidua, neutophils, platelets	ANNOTATED, CDS, coding, INTERNAL, OVCODE, OVEXON	Jeck2013, Maass2017, Rybak2015, Salzman2013	-2.26287	0.208358	0.0335928	0.219534	6.25847	8.52133	543.885	850.042	139.033	143.544	109.949	0	0	147.8	0	232.916
hsa_circ_0008902	chr13:28830428-28835595:+	PAN3	circBase	411	3	5167	chr13:28794515-28830428|chr13:28835595-28840851	ENSG00000152520.13_3	ENST00000503791.5_1	NM_175854	Hs68_RNase, Hs68_control, Nhek, K562, Huvec, Hepg2, Helas3, H1hesc, Gm12878, Bj, Ag04450, A549, Sknshra, Mcf7, diencephalon, cerebellum, occipital_lobe, frontal_cortex, parietal_lobe, temporal_lobe, platelets	ANNOTATED, CDS, coding, INTERNAL, OVCODE, OVEXON	Jeck2013, Maass2017, Rybak2015, Salzman2013	0.114862	1.08287	0.876564	0.976731	8.68505	8.57019	511.892	493.573	231.721	107.658	513.096	191.382	573.745	591.199	301.557	388.194
hsa_circ_0029855	chr13:28834583-28835595:+	PAN3	circBase	163	2	1012	chr13:28830676-28834583|chr13:28835595-28840851	ENSG00000152520.13_3	ENST00000503791.5_1	NM_175854	Nhek, K562, Huvec, Hepg2, Helas3, H1hesc, Gm12878, Bj, Ag04450, A549, Sknshra, diencephalon, cerebellum, occipital_lobe, frontal_cortex, parietal_lobe, temporal_lobe, platelets	ANNOTATED, CDS, coding, INTERNAL, OVCODE, OVEXON	Maass2017, Rybak2015, Salzman2013	0.313118	1.24239	0.767517	0.924746	7.58169	7.26857	255.946	274.207	46.3442	71.7719	73.2994	95.691	382.497	147.8	150.778	155.278
hsa_circ_0003587	chr13:30801548-30815223:-	KATNAL1	circBase	655	5	13675	chr13:30784579-30801548|chr13:30815223-30829583	ENSG00000102781.13_3	ENST00000380615.7_1	NM_032116	Hs68_RNase, Hs68_control, K562, Bj, Ag04450, diencephalon, cerebellum, occipital_lobe, frontal_cortex, Sy5y_exp1_D2, parietal_lobe, temporal_lobe	ANNOTATED, CDS, coding, INTERNAL, OVCODE, OVEXON	Jeck2013, Rybak2015, Salzman2013	0.461822	1.37728	0.688221	0.881005	7.43575	6.97393	63.9865	54.8414	46.3442	143.544	293.197	239.227	63.7494	0	452.335	77.6388
hsa_circ_0000471	chr13:33091993-33101669:-	N4BP2L2	circBase	388	4	9676	chr13:33018263-33091993|chr13:33101669-33112754	ENSG00000244754.8_3	ENST00000357505.10_1	NM_033111	HEK293, cd_19, neutr, Hs68_RNase, Hs68_control, Nhek, K562, Huvec, Hepg2, Helas3, H1hesc, Gm12878, Bj, Ag04450, A549, Sknshra, SY5Y_exp2_D0, diencephalon, Sy5y_exp1_D4, cerebellum, Sy5y_exp1_D0, occipital_lobe, frontal_cortex, Sy5y_exp1_D2, parietal_lobe, SY5Y_exp2_D8, temporal_lobe, SY5Y_exp2_D4, EPC, WAS2, ada_scid, cortex, osteocytes, adipose, decidua, VSMC, vena_cava, right_atrium, umbilical_…	ANNOTATED, CDS, coding, INTERNAL, OVCODE, OVEXON	Jeck2013, Maass2017, Memczak2013, Rybak2015, Salzman2013	-0.13386	0.91139	0.807122	0.948248	12.771	12.9048	8286.25	8527.84	7090.66	6746.55	7659.78	7368.2	9626.16	5838.09	6634.25	5434.71
hsa_circ_0100273	chr13:33109905-33111164:-	N4BP2L2	circBase	1259	1	1259	chr13:33101669-33109905|chr13:33111164-33112754	ENSG00000244754.8_3	ENST00000505213.5_2	NM_014887	diencephalon, cerebellum, occipital_lobe, frontal_cortex, parietal_lobe, temporal_lobe, SY5Y_exp2_D4	ANNOTATED, CDS, coding, INTERNAL, OVCODE, OVEXON	Rybak2015	1.28074	2.42964	0.135604	0.42953	8.0462	6.76546	127.973	82.2622	46.3442	71.7719	183.248	526.3	127.499	147.8	150.778	310.555
hsa_circ_0029976	chr13:35615069-35644989:+	NBEA	circBase	1277	9	29920	chr13:35517251-35615069|chr13:35644989-35672433	ENSG00000172915.18_3	ENST00000400445.7_1	NM_015678	Hepg2, H1hesc, Gm12878, diencephalon, cerebellum, occipital_lobe, frontal_cortex, parietal_lobe, temporal_lobe	ANNOTATED, CDS, coding, INTERNAL, OVCODE, OVERLAPTX, OVEXON	Rybak2015, Salzman2013	-0.47878	0.717584	0.590363	0.82085	7.51003	7.98881	255.946	109.683	0	430.631	439.796	287.073	127.499	221.7	75.3892	155.278
hsa_circ_0030034	chr13:40268770-40301685:+	COG6	circBase	752	7	32915	chr13:40263961-40268770|chr13:40301685-40362471	ENSG00000133103.16_2	ENST00000416691.5_1	NM_001145079	Ag04450, A549, Sknshra, Mcf7, diencephalon, cerebellum, occipital_lobe, frontal_cortex, parietal_lobe, temporal_lobe, cortex, vena_cava	ANNOTATED, CDS, coding, INTERNAL, OVCODE, OVEXON	Maass2017, Rybak2015, Salzman2013	-1.62402	0.324431	0.0958779	0.370594	6.94435	8.56837	63.9865	274.207	417.098	717.719	403.147	526.3	0	0	0	0
hsa_circ_0030049	chr13:41400641-41411021:-	LOC100616668	circBase	258	3	10380	None|chr13:41411021-41429890	ENSG00000168852.12_2	ENST00000379515.3_1	NR_038258	Nhek, Bj, Ag04450, A549, diencephalon, cerebellum, occipital_lobe, frontal_cortex, parietal_lobe, temporal_lobe, platelets	ANNOTATED, INTERNAL, ncRNA, OVEXON	Maass2017, Rybak2015, Salzman2013	0.362677	1.28581	0.707852	0.891548	7.8023	7.43963	287.939	164.524	46.3442	107.658	219.898	287.073	254.998	147.8	150.778	232.916
hsa_circ_0030101	chr13:42335263-42407667:-	KIAA0564	circBase	1001	9	72404	chr13:42306291-42335263|chr13:42407667-42439871	ENSG00000102763.17_3	ENST00000379310.7_2	NM_015058	K562, Bj, diencephalon, cerebellum, occipital_lobe, frontal_cortex, parietal_lobe, temporal_lobe	ANNOTATED, CDS, coding, INTERNAL, OVCODE, OVERLAPTX, OVEXON	Rybak2015, Salzman2013	-1.14394	0.452521	0.216596	0.542103	6.60784	7.75178	319.932	246.786	185.377	179.43	109.949	95.691	63.7494	147.8	75.3892	77.6388
hsa_circ_0004711	chr13:42385360-42393522:-	KIAA0564	circBase	363	3	8162	chr13:42361679-42385360|chr13:42393522-42404664	ENSG00000102763.17_3	ENST00000379310.7_2	NM_015058	Hs68_RNase, Hs68_control, Nhek, K562, Huvec, Hepg2, Helas3, H1hesc, Gm12878, Bj, Ag04450, A549, Sknshra, diencephalon, cerebellum, occipital_lobe, frontal_cortex, Sy5y_exp1_D2, parietal_lobe, temporal_lobe, adipose, vena_cava, muscle	ANNOTATED, CDS, coding, INTERNAL, OVCODE, OVEXON	Jeck2013, Maass2017, Rybak2015, Salzman2013	0.0879636	1.06287	1	1	7.13382	7.04586	127.973	54.8414	324.409	35.8859	109.949	95.691	63.7494	295.599	75.3892	155.278
hsa_circ_0000478	chr13:42439871-42442613:-	KIAA0564	circBase	345	3	2742	chr13:42407667-42439871|chr13:42442613-42457522	ENSG00000102763.17_3	ENST00000379310.7_2	NM_001009814	HEK293, cd_19, Hs68_RNase, Hs68_control, Nhek, K562, Hepg2, H1hesc, Gm12878, Bj, Ag04450, A549, Sknshra, diencephalon, Sy5y_exp1_D4, cerebellum, occipital_lobe, frontal_cortex, Sy5y_exp1_D2, parietal_lobe, temporal_lobe, WAS2, vena_cava	ANNOTATED, CDS, coding, INTERNAL, OVCODE, OVEXON	Jeck2013, Maass2017, Memczak2013, Rybak2015, Salzman2013	-0.116621	0.922345	1	1	7.20888	7.3255	191.959	191.945	324.409	71.7719	0	0	63.7494	369.499	226.168	77.6388
hsa_circ_0100496	chr13:42742575-42764661:+	DGKH	circBase	917	7	22086	chr13:42740810-42742575|chr13:42764661-42769020	ENSG00000102780.16_3	ENST00000379274.6_1	ENST00000498255.2	diencephalon, cerebellum, occipital_lobe, frontal_cortex, parietal_lobe, temporal_lobe	ANNOTATED, INTERNAL, ncRNA, OVCODE, OVERLAPTX, OVEXON	Rybak2015	-1.46775	0.361545	0.249421	0.576936	8.19647	9.66422	319.932	850.042	139.033	1543.09	1172.79	1387.52	0	0	0	0
hsa_circ_0000479	chr13:43528083-43544806:-	EPSTI1	circBase	375	5	16723	chr13:43500565-43528083|chr13:43544806-43566113	ENSG00000133106.14_3	ENST00000313640.11_1	NM_033255	cd_19, Hs68_RNase, Hs68_control, WAS2, decidua, platelets	ANNOTATED, CDS, coding, INTERNAL, OVCODE, OVEXON	Jeck2013, Maass2017, Memczak2013	2.65938	6.3176	0.0458442	0.26246	8.43178	5.7724	63.9865	0	0	143.544	36.6497	0	0	591.199	1130.84	0
hsa_circ_0100599	chr13:46559431-46594692:-	ZC3H13	circBase	1381	6	35261	chr13:46554139-46559431|chr13:46594692-46616298	ENSG00000123200.16_4	ENST00000242848.8_2	ENST00000242848.4	Sy5y_exp1_D0	ANNOTATED, CDS, coding, INTERNAL, OVCODE, OVEXON	Rybak2015	-1.68727	0.310514	0.13851	0.434547	6.09502	7.78229	0	109.683	509.786	107.658	366.497	95.691	127.499	0	75.3892	0
hsa_circ_0141101	chr13:46577273-46594692:-	ZC3H13	circBase	605	4	17419	chr13:46563232-46577273|chr13:46594692-46616298	ENSG00000123200.16_4	ENST00000242848.8_2	ENST00000242848.4	neutophils, platelets	ANNOTATED, CDS, coding, INTERNAL, OVCODE, OVEXON	Maass2017	-0.994448	0.501928	0.286133	0.597248	7.52374	8.51819	31.9932	219.366	1112.26	287.087	183.248	430.609	127.499	0	301.557	0
hsa_circ_0100605	chr13:46577273-46619651:-	ZC3H13	circBase	953	7	42378	chr13:46563232-46577273|chr13:46619651-46626832	ENSG00000123200.16_4	ENST00000282007.7_2	ENST00000282007.3	diencephalon, occipital_lobe, temporal_lobe, SY5Y_exp2_D4	ANNOTATED, CDS, coding, INTERNAL, OVCODE, OVEXON, UTR5	Rybak2015	-0.743053	0.597473	0.52733	0.778928	6.14748	6.89054	0	82.2622	278.065	143.544	73.2994	287.073	0	0	0	0
hsa_circ_0002215	chr13:47297355-47308133:+	LRCH1	circBase	326	3	10778	chr13:47286732-47297355|chr13:47308133-47324674	ENSG00000136141.14_3	ENST00000311191.10_1	NM_001164211	Hs68_RNase, Hs68_control, Nhek, K562, Hsmm, Hepg2, Helas3, Gm12878, Bj, Ag04450, A549, Sknshra, Mcf7, SY5Y_exp2_D0, diencephalon, Sy5y_exp1_D4, cerebellum, Sy5y_exp1_D0, occipital_lobe, frontal_cortex, Sy5y_exp1_D2, parietal_lobe, temporal_lobe, SY5Y_exp2_D4, WAS2, neutophils, platelets	ANNOTATED, CDS, coding, INTERNAL, OVCODE, OVEXON	Jeck2013, Maass2017, Rybak2015, Salzman2013	-0.87722	0.544416	0.32882	0.631349	7.98945	8.86667	607.871	1288.77	46.3442	0	329.847	287.073	127.499	295.599	376.946	155.278
hsa_circ_0030254	chr13:50025688-50042096:+	SETDB2	circBase	682	5	16408	chr13:50018993-50025688|chr13:50042096-50050611	ENSG00000136169.16_3	ENST00000354234.8_1	NM_031915	K562, Hepg2, H1hesc, Gm12878, Ag04450, A549, Sknshra, diencephalon, cerebellum, Sy5y_exp1_D0, occipital_lobe, frontal_cortex, parietal_lobe, temporal_lobe, vena_cava, platelets	ANNOTATED, CDS, coding, INTERNAL, OVCODE, OVEXON, UTR5	Maass2017, Rybak2015, Salzman2013	1.64007	3.11681	0.131957	0.428778	7.76804	6.12797	31.9932	27.4207	46.3442	0	219.898	191.382	191.248	0	527.725	155.278
hsa_circ_0000489	chr13:51501542-51523641:+	RNASEH2B	circBase	677	8	22099	chr13:51484276-51501542|chr13:51523641-51528040	ENSG00000136104.19_3	ENST00000336617.7_1	NM_024570	cd_19, neutr, Hs68_RNase, Hs68_control, Nhek, K562, Huvec, Hepg2, Helas3, H1hesc, Gm12878, A549, Sknshra, SY5Y_exp2_D0, diencephalon, cerebellum, Sy5y_exp1_D0, occipital_lobe, frontal_cortex, Sy5y_exp1_D2, parietal_lobe, temporal_lobe, WAS2	ANNOTATED, CDS, coding, INTERNAL, OVCODE, OVEXON	Jeck2013, Maass2017, Memczak2013, Rybak2015, Salzman2013	-0.568122	0.674494	0.410482	0.703296	9.14107	9.70919	831.824	1480.72	1112.26	394.745	329.847	813.373	956.241	295.599	226.168	465.833
hsa_circ_0008776	chr13:52971366-52972329:-	THSD1	circBase	963	1	963	chr13:52952924-52971366|chr13:52972329-52976677	ENSG00000136114.15_2	ENST00000349258.8_1	NM_018676	Hs68_RNase, Hs68_control, Nhek, Huvec, Hsmm, H1hesc, Bj, Ag04450, Sknshra, diencephalon, cerebellum, occipital_lobe, frontal_cortex, parietal_lobe, temporal_lobe, EPC, adipose	ANNOTATED, CDS, coding, INTERNAL, OVCODE, OVEXON	Jeck2013, Maass2017, Rybak2015, Salzman2013	3.67497	12.7725	0.000256552	0.0194828	8.35732	4.68234	63.9865	27.4207	0	0	0	95.691	254.998	369.499	376.946	543.471
hsa_circ_0008581	chr13:52971366-52976816:-	THSD1	circBase	1102	2	5450	chr13:52952924-52971366|chr13:52976816-52980165	ENSG00000136114.15_2	ENST00000349258.8_1	NM_018676	Hs68_RNase, Hs68_control, K562, Huvec, Ag04450, diencephalon, cerebellum, Sy5y_exp1_D0, occipital_lobe, frontal_cortex, parietal_lobe, temporal_lobe	ANNOTATED, CDS, coding, INTERNAL, OVCODE, OVEXON, UTR5	Jeck2013, Rybak2015, Salzman2013	0.939269	1.91756	0.325296	0.628724	8.14763	7.20836	191.959	164.524	92.6884	0	256.548	143.536	191.248	0	301.557	776.388
hsa_circ_0003441	chr13:61013821-61041513:+	TDRD3	circBase	450	4	27692	chr13:60971144-61013821|chr13:61041513-61057908	ENSG00000083544.13_3	ENST00000196169.7_2	NM_001146070	Hs68_RNase, Hs68_control, Nhek, K562, Hepg2, Helas3, H1hesc, Gm12878, Bj, Ag04450, A549, Sknshra, SY5Y_exp2_D0, diencephalon, cerebellum, Sy5y_exp1_D0, occipital_lobe, frontal_cortex, Sy5y_exp1_D2, parietal_lobe, temporal_lobe, ada_scid, vena_cava, right_atrium, platelets	ANNOTATED, CDS, coding, INTERNAL, OVCODE, OVEXON	Jeck2013, Maass2017, Rybak2015, Salzman2013	-0.954236	0.516115	0.218031	0.54287	8.0213	8.97554	639.865	520.994	602.474	322.973	403.147	191.382	191.248	295.599	603.114	0
hsa_circ_0030378	chr13:61013821-61109367:+	TDRD3	circBase	2073	11	95546	chr13:60971144-61013821|chr13:61109367-61141658	ENSG00000083544.13_3	ENST00000196169.7_2	NM_001146070	Ag04450, Sknshra, diencephalon, cerebellum, frontal_cortex, parietal_lobe, temporal_lobe	ANNOTATED, CDS, coding, INTERNAL, OVCODE, OVERLAPTX, OVEXON	Rybak2015, Salzman2013	-0.0386103	0.973592	1	1	7.58709	7.6257	159.966	0	417.098	143.544	256.548	0	701.244	0	75.3892	155.278
chr13:76195898-76301234:+	chr13:76195898-76301234:+	AL137782.1	CIRCexplorer2	247	3	105336	chr13:76169126-76195898|chr13:76301234-76335067	ENSG00000261553.5_4	ENST00000563635.5_1	NA	NA	NA	NA	-1.54351	0.343049	0.0411159	0.250894	7.97334	9.51686	1631.65	822.622	509.786	287.087	366.497	287.073	318.747	73.8999	75.3892	465.833
chr13:76195898-76335174:+	chr13:76195898-76335174:+	AL137782.1	CIRCexplorer2	354	4	139276	chr13:76169126-76195898|chr13:76335174-76369536	ENSG00000261553.5_4	ENST00000563635.5_1	NA	NA	NA	NA	-0.753124	0.593318	0.346174	0.644428	8.09222	8.84535	351.926	137.104	417.098	861.262	513.096	717.682	254.998	73.8999	0	232.916
hsa_circ_0030509	chr13:77779390-77818086:-	MYCBP2	circBase	1462	11	38696	chr13:77768379-77779390|chr13:77818086-77825285	ENSG00000005810.17_1	ENST00000544440.6_1	NM_015057	Gm12878, Bj, Mcf7, diencephalon, occipital_lobe, frontal_cortex, parietal_lobe, temporal_lobe, adipose, vena_cava	ANNOTATED, CDS, coding, INTERNAL, OVCODE, OVERLAPTX, OVEXON	Maass2017, Rybak2015, Salzman2013	-0.412051	0.751554	0.763348	0.923503	7.59808	8.01013	95.9797	191.945	926.884	71.7719	0	191.382	0	369.499	0	388.194
hsa_circ_0100928	chr13:78293666-78320990:+	SLAIN1	circBase	632	3	27324	chr13:78272674-78293666|chr13:78320990-78327337	ENSG00000139737.21_4	ENST00000418532.5_3	NM_001242868	diencephalon, cerebellum, occipital_lobe, frontal_cortex, parietal_lobe, temporal_lobe	ANNOTATED, CDS, coding, INTERNAL, OVCODE, OVEXON	Rybak2015	-1.1348	0.455399	0.210571	0.533845	7.47304	8.60783	63.9865	301.628	1112.26	251.202	219.898	478.455	254.998	0	0	77.6388
hsa_circ_0000497	chr13:78293666-78327493:+	SLAIN1	circBase	788	4	33827	chr13:78272674-78293666|chr13:78327493-78334962	ENSG00000139737.21_4	ENST00000418532.5_3	NM_001040153	HEK293, neutr, H1hesc, Gm12878, Mcf7, SY5Y_exp2_D0, diencephalon, Sy5y_exp1_D4, cerebellum, Sy5y_exp1_D0, occipital_lobe, frontal_cortex, Sy5y_exp1_D2, parietal_lobe, temporal_lobe, WAS2, LCL	ANNOTATED, CDS, coding, INTERNAL	Maass2017, Memczak2013, Rybak2015, Salzman2013	-2.33991	0.197522	0.0162402	0.159053	9.61378	11.9537	1855.61	904.884	11539.7	1722.52	3811.57	2296.58	127.499	591.199	829.282	0
hsa_circ_0100935	chr13:78318417-78327493:+	SLAIN1	circBase	648	3	9076	chr13:78293806-78318417|chr13:78327493-78334962	ENSG00000139737.21_4	ENST00000418532.5_3	NM_001242871	diencephalon, occipital_lobe, parietal_lobe	ANNOTATED, CDS, coding, INTERNAL, OVCODE, OVEXON, UTR5	Rybak2015	-2.35728	0.195159	0.0168028	0.160643	7.73084	10.0881	191.959	54.8414	4449.04	215.316	549.745	239.227	254.998	73.8999	150.778	310.555
hsa_circ_0030533	chr13:79915257-79918929:-	RBM26	circBase	474	4	3672	chr13:79911437-79915257|chr13:79918929-79928573	ENSG00000139746.15_3	ENST00000438724.5_1	NM_022118	Nhek, K562, Helas3, Ag04450, diencephalon, cerebellum, occipital_lobe, frontal_cortex, parietal_lobe, temporal_lobe, cortex	ANNOTATED, CDS, coding, INTERNAL, OVCODE, OVEXON	Maass2017, Rybak2015, Salzman2013	-0.323418	0.799174	0.689412	0.881797	8.51022	8.83364	319.932	630.676	92.6884	681.833	513.096	956.91	254.998	147.8	376.946	0
hsa_circ_0101033	chr13:96263698-96264431:-	DZIP1	circBase	190	2	733	chr13:96258313-96263698|chr13:96264431-96272138	ENSG00000134874.17_2	ENST00000361396.6_1	NM_198968	diencephalon, cerebellum, occipital_lobe, frontal_cortex, parietal_lobe, temporal_lobe	ANNOTATED, CDS, coding, INTERNAL, OVCODE, OVEXON	Rybak2015	1.40801	2.65371	0.175271	0.489682	7.98732	6.57931	191.959	0	0	107.658	146.599	191.382	446.246	443.399	0	155.278
hsa_circ_0002473	chr13:96375495-96377506:+	DNAJC3	circBase	200	2	2011	chr13:96361591-96375495|chr13:96377506-96409897	ENSG00000102580.14_3	ENST00000602402.5_1	NM_006260	Hs68_RNase, Hs68_control, Nhek, K562, Huvec, Hepg2, Helas3, H1hesc, Gm12878, Bj, Ag04450, A549, Sknshra, diencephalon, Sy5y_exp1_D4, cerebellum, Sy5y_exp1_D0, occipital_lobe, frontal_cortex, Sy5y_exp1_D2, parietal_lobe, temporal_lobe, SY5Y_exp2_D4, WAS2, ada_scid, HUAEC, neutophils, platelets	ANNOTATED, CDS, coding, INTERNAL, OVCODE, OVEXON	Jeck2013, Maass2017, Rybak2015, Salzman2013	0.483941	1.39856	0.622379	0.839981	7.75831	7.27437	31.9932	191.945	46.3442	322.973	146.599	95.691	0	443.399	75.3892	465.833
hsa_circ_0101041	chr13:96409897-96416207:+	DNAJC3	circBase	682	5	6310	chr13:96377506-96409897|chr13:96416207-96438192	ENSG00000102580.14_3	ENST00000602402.5_1	ENST00000602402.1	SY5Y_exp2_D0, diencephalon, cerebellum, Sy5y_exp1_D0, occipital_lobe, frontal_cortex, Sy5y_exp1_D2, parietal_lobe, temporal_lobe	ANNOTATED, CDS, coding, INTERNAL, OVCODE, OVEXON	Rybak2015	0.631828	1.54953	0.348853	0.647547	9.19016	8.55833	351.926	356.469	278.065	645.947	219.898	287.073	892.492	886.798	527.725	310.555
hsa_circ_0030720	chr13:99890680-99896878:+	UBAC2	circBase	358	3	6198	chr13:99853193-99890680|chr13:99896878-99966350	ENSG00000134882.15_3	ENST00000403766.7_1	NR_026644	Nhek, K562, Huvec, Hepg2, Helas3, H1hesc, Gm12878, Bj, Ag04450, A549, Sknshra, Mcf7, diencephalon, cerebellum, occipital_lobe, frontal_cortex, parietal_lobe, temporal_lobe, neutophils, platelets	ANNOTATED, INTERNAL, ncRNA, OVCODE, OVERLAPTX, OVEXON	Maass2017, Rybak2015, Salzman2013	-0.265143	0.832116	0.750329	0.917306	7.98052	8.24566	191.959	438.731	231.721	107.658	513.096	191.382	509.995	369.499	0	155.278
hsa_circ_0002398	chr14:102506572-102507010:+	DYNC1H1	circBase	251	2	438	chr14:102506069-102506572|chr14:102507010-102507910	ENSG00000197102.10_2	ENST00000360184.8_1	NM_001376	Hs68_RNase, Hs68_control, diencephalon, Sy5y_exp1_D4, cerebellum, Sy5y_exp1_D0, occipital_lobe, frontal_cortex, Sy5y_exp1_D2, parietal_lobe, temporal_lobe, EPC, WAS2, adipose, vena_cava, muscle, HUAEC, fibroblasts	ANNOTATED, CDS, coding, INTERNAL, OVCODE, OVEXON	Jeck2013, Maass2017, Rybak2015	0.180515	1.13329	0.803577	0.948248	9.48205	9.30153	767.838	1206.51	324.409	215.316	586.395	669.837	191.248	1330.2	904.671	465.833
hsa_circ_0000569	chr14:102659799-102661457:+	WDR20	circBase	235	2	1658	chr14:102606509-102659799|chr14:102661457-102675198	ENSG00000140153.17_3	ENST00000555879.5_1	NR_038354	cd_19, Hs68_RNase, Hs68_control, diencephalon, cerebellum, occipital_lobe, frontal_cortex, parietal_lobe, temporal_lobe, platelets	ANNOTATED, INTERNAL, ncRNA, OVCODE, OVEXON	Jeck2013, Maass2017, Memczak2013, Rybak2015	-0.0870277	0.94146	1	1	7.56901	7.65604	159.966	301.628	185.377	35.8859	293.197	0	127.499	591.199	226.168	0
hsa_circ_0002553	chr14:102661274-102676199:+	WDR20	circBase	1443	2	14925	chr14:102606509-102661274|chr14:102676199-102689166	ENSG00000140153.17_3	ENST00000335263.9_1	NM_181291	Hs68_RNase, Hs68_control, SY5Y_exp2_D0, diencephalon, cerebellum, Sy5y_exp1_D0, occipital_lobe, frontal_cortex, Sy5y_exp1_D2, parietal_lobe, SY5Y_exp2_D8, SY5Y_exp2_D4, WAS2, LCL, placenta	ANNOTATED, CDS, coding, INTERNAL, OVCODE, OVEXON	Jeck2013, Maass2017, Rybak2015	-0.0290709	0.980051	1	1	7.79202	7.82109	319.932	356.469	46.3442	251.202	109.949	143.536	254.998	0	150.778	543.471
hsa_circ_0000571	chr14:103470264-103478525:-	CDC42BPB	circBase	272	3	8261	chr14:103466050-103470264|chr14:103478525-103523335	ENSG00000198752.10_2	ENST00000361246.6_1	NM_006035	HEK293, Hs68_RNase, Hs68_control, SY5Y_exp2_D0, diencephalon, cerebellum, Sy5y_exp1_D0, occipital_lobe, frontal_cortex, parietal_lobe, temporal_lobe, WAS2, HUAEC, platelets	ANNOTATED, CDS, coding, INTERNAL, OVCODE, OVEXON	Jeck2013, Maass2017, Memczak2013, Rybak2015	-0.24077	0.846294	0.903736	0.990007	6.7285	6.96927	63.9865	164.524	231.721	143.544	0	191.382	0	147.8	150.778	0
hsa_circ_0007737	chr14:104135847-104139768:+	KLC1	circBase	464	4	3921	chr14:104129264-104135847|chr14:104139768-104141888	ENSG00000256500.5_4	ENST00000472726.2_1	NM_005552	Hs68_RNase, Hs68_control, Nhek, K562, Ag04450, diencephalon, cerebellum, occipital_lobe, frontal_cortex, parietal_lobe, temporal_lobe	ANNOTATED, CDS, coding, INTERNAL, OVCODE, OVEXON	Jeck2013, Rybak2015, Salzman2013	-0.296863	0.814021	0.920446	0.992903	6.75552	7.05239	31.9932	301.628	0	179.43	109.949	0	0	0	226.168	310.555
hsa_circ_0005791	chr14:104245081-104263855:-	PPP1R13B	circBase	345	3	18774	chr14:104224088-104245081|chr14:104263855-104313635	ENSG00000088808.16_2	ENST00000202556.13_1	NM_015316	Hs68_RNase, Hs68_control, K562, Helas3, Sknshra, diencephalon, Sy5y_exp1_D4, cerebellum, Sy5y_exp1_D0, occipital_lobe, frontal_cortex, Sy5y_exp1_D2, parietal_lobe, SY5Y_exp2_D8, temporal_lobe, vena_cava, right_atrium, HUAEC	ANNOTATED, CDS, coding, INTERNAL, OVCODE, OVEXON	Jeck2013, Maass2017, Rybak2015, Salzman2013	-0.163631	0.892775	0.875426	0.976731	8.28183	8.44546	479.898	164.524	231.721	179.43	659.694	956.91	127.499	147.8	0	232.916
hsa_circ_0003643	chr14:21698477-21702388:-	HNRNPC	circBase	401	3	3911	chr14:21681276-21698477|chr14:21702388-21737456	ENSG00000092199.17_4	ENST00000336053.10_1	NM_031314	Hs68_RNase, Hs68_control, Nhek, K562, Huvec, Hsmm, Hepg2, Helas3, H1hesc, Gm12878, Bj, Ag04450, A549, Nhlf, Sknshra, Mcf7, diencephalon, cerebellum, frontal_cortex, temporal_lobe	ANNOTATED, CDS, coding, INTERNAL, OVCODE, OVEXON, UTR5	Jeck2013, Rybak2015, Salzman2013	-0.396439	0.759731	0.801565	0.947204	6.68308	7.07952	159.966	164.524	139.033	71.7719	109.949	0	127.499	221.7	0	155.278
hsa_circ_0000523	chr14:21971315-21972024:-	METTL3	circBase	623	2	709	chr14:21970045-21971315|chr14:21972024-21979265	ENSG00000165819.11_3	ENST00000298717.8_1	NM_019852	cd_19, cd_34, Hs68_RNase, Hs68_control, Nhek, K562, Huvec, Hsmm, Hepg2, Helas3, H1hesc, Gm12878, Bj, Ag04450, A549, Sknshra, Mcf7, SY5Y_exp2_D0, diencephalon, Sy5y_exp1_D4, cerebellum, Sy5y_exp1_D0, occipital_lobe, frontal_cortex, Sy5y_exp1_D2, parietal_lobe, temporal_lobe, SY5Y_exp2_D4, WAS2, adipose, decidua	ANNOTATED, CDS, coding, INTERNAL, OVCODE, OVEXON	Jeck2013, Maass2017, Memczak2013, Rybak2015, Salzman2013	1.40156	2.64187	0.0306731	0.211759	10.2455	8.84394	287.939	274.207	602.474	681.833	439.796	717.682	1848.73	1330.2	527.725	1630.41
hsa_circ_0031241	chr14:23375403-23380612:-	RBM23	circBase	411	4	5209	chr14:23374868-23375403|chr14:23380612-23388207	ENSG00000100461.17_3	ENST00000359890.7_2	NM_001077351	Nhek, K562, Huvec, Hepg2, Helas3, H1hesc, Gm12878, Bj, Ag04450, A549, Sknshra, Mcf7, diencephalon, cerebellum, Sy5y_exp1_D0, occipital_lobe, frontal_cortex, parietal_lobe, temporal_lobe, WAS2, ada_scid, platelets	ANNOTATED, CDS, coding, INTERNAL, OVCODE, OVEXON, UTR5	Maass2017, Rybak2015, Salzman2013	0.38468	1.30557	0.539309	0.786721	9.66024	9.27556	735.844	850.042	602.474	358.859	513.096	382.764	1019.99	1182.4	603.114	854.026
hsa_circ_0000524	chr14:23378691-23380612:-	RBM23	circBase	189	2	1921	chr14:23377589-23378691|chr14:23380612-23388207	ENSG00000100461.17_3	ENST00000359890.7_2	NM_001077352	cd_19, neutr, Hs68_RNase, Hs68_control, Nhek, K562, Huvec, Hepg2, H1hesc, Gm12878, Bj, Ag04450, A549, Sknshra, SY5Y_exp2_D0, diencephalon, Sy5y_exp1_D4, cerebellum, Sy5y_exp1_D0, occipital_lobe, frontal_cortex, Sy5y_exp1_D2, parietal_lobe, temporal_lobe, WAS2, ada_scid, adipose, decidua, VSMC, vena_cava, right_atrium, muscle, LCL, neutophils, platelets	ANNOTATED, CDS, coding, INTERNAL, OVCODE, OVEXON, UTR5	Jeck2013, Maass2017, Memczak2013, Rybak2015, Salzman2013	-0.153026	0.899362	0.80857	0.948248	11.2015	11.3545	4351.08	3153.38	3707.53	861.262	989.542	1770.28	2741.23	2955.99	1960.12	2329.16
hsa_circ_0031250	chr14:23395341-23396023:-	PRMT5	circBase	327	3	682	chr14:23394249-23395341|chr14:23396023-23396734	ENSG00000100462.15_3	ENST00000324366.12_2	NM_001039619	Nhek, K562, Huvec, Hepg2, Helas3, H1hesc, Gm12878, A549, Sknshra, diencephalon, cerebellum, occipital_lobe, frontal_cortex, parietal_lobe, temporal_lobe	ANNOTATED, CDS, coding, INTERNAL, OVCODE, OVERLAPTX, OVEXON	Rybak2015, Salzman2013	1.90965	3.75719	0.0638658	0.310549	7.84047	5.93081	127.973	0	0	35.8859	109.949	191.382	318.747	0	452.335	155.278
hsa_circ_0002928	chr14:23395341-23396869:-	PRMT5	circBase	462	4	1528	chr14:23394249-23395341|chr14:23396869-23397334	ENSG00000100462.15_3	ENST00000324366.12_2	NM_001039619	Hs68_RNase, Hs68_control, Nhek, K562, Huvec, Hepg2, Helas3, Gm12878, Bj, Sknshra, diencephalon, cerebellum, occipital_lobe, frontal_cortex, parietal_lobe, temporal_lobe, HUAEC	ANNOTATED, CDS, coding, INTERNAL, OVCODE, OVEXON	Jeck2013, Maass2017, Rybak2015, Salzman2013	1.11181	2.16117	0.351053	0.650228	7.66781	6.55599	127.973	54.8414	0	107.658	146.599	191.382	701.244	73.8999	0	0
hsa_circ_0031446	chr14:31404368-31425448:-	STRN3	circBase	706	6	21080	chr14:31382863-31404368|chr14:31425448-31495109	ENSG00000196792.11_2	ENST00000355683.9_2	NM_001083893	K562, Helas3, Gm12878, Ag04450, A549, Sknshra, diencephalon, cerebellum, occipital_lobe, frontal_cortex, Sy5y_exp1_D2, parietal_lobe, temporal_lobe, umbilical_cord, platelets	ANNOTATED, CDS, coding, INTERNAL, OVCODE, OVEXON	Maass2017, Rybak2015, Salzman2013	-1.91903	0.264432	0.0279036	0.200689	6.5141	8.43313	351.926	219.366	370.753	251.202	513.096	191.382	127.499	0	75.3892	0
hsa_circ_0007656	chr14:31424825-31425448:-	STRN3	circBase	178	2	623	chr14:31420150-31424825|chr14:31425448-31495109	ENSG00000196792.11_2	ENST00000355683.9_2	NM_001083893	Hs68_RNase, Hs68_control, K562, Bj, Ag04450, A549, Sknshra, SY5Y_exp2_D0, diencephalon, cerebellum, occipital_lobe, frontal_cortex, parietal_lobe, temporal_lobe, chondrocytes, vena_cava, right_atrium, umbilical_cord, platelets	ANNOTATED, CDS, coding, INTERNAL, OVCODE, OVEXON	Jeck2013, Maass2017, Rybak2015, Salzman2013	0.87239	1.83069	0.323378	0.627791	8.38703	7.51464	159.966	301.628	46.3442	143.544	219.898	95.691	446.246	591.199	527.725	0
hsa_circ_0002301	chr14:31596990-31602881:-	HECTD1	circBase	1403	4	5891	chr14:31592253-31596990|chr14:31602881-31604077	ENSG00000092148.12_3	ENST00000611816.4_2	NM_015382	Hs68_RNase, Hs68_control, Nhek, K562, Hepg2, Helas3, Bj, Ag04450, A549, Sknshra, diencephalon, cerebellum, Sy5y_exp1_D0, occipital_lobe, frontal_cortex, Sy5y_exp1_D2, parietal_lobe, temporal_lobe, WAS2	ANNOTATED, CDS, coding, INTERNAL, OVCODE, OVEXON	Jeck2013, Maass2017, Rybak2015, Salzman2013	-0.855974	0.552492	0.233225	0.559134	8.72984	9.58582	1151.76	1398.46	139.033	430.631	659.694	382.764	573.745	221.7	603.114	310.555
hsa_circ_0031482	chr14:31596990-31641328:-	HECTD1	circBase	3837	22	44338	chr14:31592253-31596990|chr14:31641328-31642361	ENSG00000092148.12_3	ENST00000611816.4_2	NM_015382	K562, Hepg2, Helas3, H1hesc, Gm12878, Bj, Ag04450, A549, Sknshra, diencephalon, Sy5y_exp1_D4, cerebellum, Sy5y_exp1_D0, occipital_lobe, frontal_cortex, parietal_lobe, temporal_lobe, WAS2, VSMC	ANNOTATED, CDS, coding, INTERNAL, OVCODE, OVERLAPTX, OVEXON	Maass2017, Rybak2015, Salzman2013	-0.787756	0.579244	0.497068	0.762646	7.08672	7.87448	383.919	438.731	278.065	35.8859	0	95.691	318.747	0	0	232.916
hsa_circ_0031583	chr14:32559707-32563592:+	ARHGAP5	circBase	3885	1	3885	chr14:32546259-32559707|chr14:32563592-32586348	ENSG00000100852.12_3	ENST00000556611.5_1	NM_001030055	Nhek, K562, Helas3, H1hesc, Gm12878, Bj, Ag04450, A549, Sknshra, SY5Y_exp2_D0, cerebellum, occipital_lobe, frontal_cortex, vena_cava	ANNOTATED, CDS, coding, INTERNAL, OVCODE, OVERLAPTX, OVEXON, UTR5	Maass2017, Rybak2015, Salzman2013	-0.242587	0.845228	0.809662	0.94872	7.63146	7.87405	287.939	329.049	231.721	215.316	73.2994	239.227	254.998	147.8	0	310.555
hsa_circ_0031584	chr14:32559707-32586493:+	ARHGAP5	circBase	4030	2	26786	chr14:32546259-32559707|chr14:32586493-32615468	ENSG00000100852.12_3	ENST00000556611.5_1	NM_001030055	Nhek, K562, Hepg2, Helas3, H1hesc, Gm12878, Bj, Ag04450, A549, Sknshra, diencephalon, cerebellum, occipital_lobe, frontal_cortex, parietal_lobe, temporal_lobe, vena_cava	ANNOTATED, CDS, coding, INTERNAL, OVCODE, OVERLAPTX, OVEXON, UTR5	Maass2017, Rybak2015, Salzman2013	-0.45732	0.728338	0.513867	0.771106	10.9418	11.3992	2015.57	1316.19	5375.92	1937.84	2858.68	2344.43	1976.23	147.8	678.503	4658.33
hsa_circ_0101677	chr14:33684387-33684793:+	NPAS3	circBase	296	2	406	chr14:33408572-33684387|chr14:33684793-33836391	ENSG00000151322.18_3	ENST00000357798.9_1	NM_173159	diencephalon, cerebellum, occipital_lobe, frontal_cortex, parietal_lobe, temporal_lobe	ANNOTATED, CDS, coding, INTERNAL, OVCODE, OVERLAPTX, OVEXON	Rybak2015	1.07937	2.11311	0.101018	0.37541	10.2094	9.13004	351.926	164.524	1019.57	610.061	659.694	526.3	2039.98	886.798	980.06	1475.14
chr14:33684387-33836474:+	chr14:33684387-33836474:+	NPAS3	CIRCexplorer2	328	2	152087	chr14:33404209-33684387|chr14:33836474-34029326	ENSG00000151322.18_3	ENST00000551634.5_1	NA	NA	NA	NA	0.832471	1.78073	0.381138	0.680961	8.59229	7.75982	95.9797	54.8414	417.098	251.202	256.548	0	1147.49	221.7	150.778	388.194
chr14:33684387-34029416:+	chr14:33684387-34029416:+	NPAS3	CIRCexplorer2	418	3	345029	chr14:33404209-33684387|chr14:34029416-34145416	ENSG00000151322.18_3	ENST00000551634.5_1	NA	NA	NA	NA	1.4242	2.68366	0.0961551	0.370629	8.42674	7.00254	95.9797	27.4207	139.033	287.087	73.2994	287.073	637.494	73.8999	376.946	310.555
hsa_circ_0031677	chr14:36133847-36194359:-	RALGAPA1	circBase	2074	13	60512	chr14:36128402-36133847|chr14:36194359-36197567	ENSG00000174373.16_3	ENST00000389698.7_1	NM_014990	K562, Huvec, Hepg2, Helas3, Gm12878, Bj, Ag04450, A549, Sknshra	ANNOTATED, CDS, coding, INTERNAL, OVCODE, OVERLAPTX, OVEXON	Salzman2013	-0.839604	0.558797	0.278064	0.591851	7.82348	8.66309	287.939	630.676	231.721	466.517	366.497	191.382	446.246	73.8999	150.778	232.916
hsa_circ_0101798	chr14:39623414-39628754:-	TRAPPC6B	circBase	1350	2	5340	chr14:39621043-39623414|chr14:39628754-39639218	ENSG00000182400.14_3	ENST00000469361.5_1	NM_001079537	diencephalon, cerebellum, occipital_lobe, frontal_cortex, parietal_lobe, temporal_lobe	ANNOTATED, CDS, coding, INTERNAL, OVCODE, OVEXON	Rybak2015	1.65484	3.14889	0.0660455	0.316327	7.95874	6.3039	0	137.104	0	71.7719	146.599	143.536	254.998	295.599	301.557	232.916
hsa_circ_0002395	chr14:39627488-39628754:-	TRAPPC6B	circBase	1266	1	1266	chr14:39623498-39627488|chr14:39628754-39639218	ENSG00000182400.14_3	ENST00000469361.5_1	NM_001079537	Hs68_RNase, Hs68_control, Ag04450, diencephalon, cerebellum, occipital_lobe, frontal_cortex, parietal_lobe, temporal_lobe, platelets	ANNOTATED, CDS, coding, INTERNAL, OVCODE, OVEXON	Jeck2013, Maass2017, Rybak2015, Salzman2013	-2.8478	0.138908	0.00282827	0.0647629	5.71038	8.55818	319.932	712.939	231.721	430.631	146.599	191.382	0	0	0	0
hsa_circ_0101802	chr14:39648294-39648666:+	PNN	circBase	295	2	372	chr14:39647120-39648294|chr14:39648666-39649706	ENSG00000100941.8_2	ENST00000216832.8_1	NM_002687	SY5Y_exp2_D0, diencephalon, Sy5y_exp1_D4, cerebellum, occipital_lobe, frontal_cortex, Sy5y_exp1_D2, parietal_lobe, temporal_lobe, SY5Y_exp2_D4	ANNOTATED, CDS, coding, INTERNAL, OVCODE, OVEXON	Rybak2015	-0.213711	0.862316	0.741829	0.910683	9.82505	10.0388	1663.65	1590.4	463.442	897.148	586.395	1052.6	1083.74	665.099	527.725	1164.58
hsa_circ_0000530	chr14:39746137-39748741:+	CTAGE5	circBase	243	3	2604	chr14:39722375-39746137|chr14:39748741-39760222	ENSG00000150527.17_4	ENST00000553728.1_3	NM_001247989	cd_19, Hs68_RNase, Hs68_control, diencephalon, cerebellum, occipital_lobe, frontal_cortex, Sy5y_exp1_D2, parietal_lobe, temporal_lobe, platelets	ANNOTATED, CDS, coding, INTERNAL, OVCODE, OVEXON	Jeck2013, Maass2017, Memczak2013, Rybak2015	-0.977174	0.507974	0.291203	0.602243	7.07232	8.0495	95.9797	438.731	324.409	179.43	256.548	382.764	63.7494	0	0	155.278
hsa_circ_0031749	chr14:39782543-39796226:+	CTAGE5	circBase	638	7	13683	chr14:39777791-39782543|chr14:39796226-39815107	ENSG00000150527.17_4	ENST00000553728.1_3	NM_001247989	Hepg2, Helas3, Gm12878, A549, diencephalon, cerebellum, occipital_lobe, frontal_cortex, parietal_lobe, temporal_lobe	ANNOTATED, CDS, coding, INTERNAL, OVCODE, OVEXON	Rybak2015, Salzman2013	0.00962618	1.00669	1	1	8.43755	8.42792	127.973	164.524	741.507	251.202	439.796	382.764	191.248	221.7	678.503	232.916
hsa_circ_0101926	chr14:50175876-50210523:+	KLHDC1	circBase	912	11	34647	chr14:50160008-50175876|chr14:50210523-50218303	ENSG00000197776.7_2	ENST00000556392.5_1	ENST00000359332.2	diencephalon, cerebellum, occipital_lobe, frontal_cortex, parietal_lobe, temporal_lobe	ANNOTATED, CDS, coding, INTERNAL, OVCODE, OVEXON	Rybak2015	-1.29586	0.407293	0.159829	0.465777	6.90388	8.19974	383.919	164.524	278.065	215.316	403.147	191.382	63.7494	0	301.557	0
hsa_circ_0101944	chr14:50262508-50298079:-	NEMF	circBase	1737	16	35571	chr14:50256291-50262508|chr14:50298079-50298768	ENSG00000165525.17_2	ENST00000298310.9_1	ENST00000556925.1	diencephalon, cerebellum, occipital_lobe, frontal_cortex, parietal_lobe, temporal_lobe	ANNOTATED, INTERNAL, ncRNA, OVCODE, OVERLAPTX, OVEXON	Rybak2015	-0.665569	0.63044	0.33564	0.636754	8.63777	9.30334	703.851	904.884	231.721	717.719	549.745	191.382	573.745	221.7	452.335	543.471
hsa_circ_0101947	chr14:50266192-50298079:-	NEMF	circBase	1583	15	31887	chr14:50262662-50266192|chr14:50298079-50298768	ENSG00000165525.17_2	ENST00000298310.9_1	ENST00000556925.1	diencephalon, cerebellum, occipital_lobe, frontal_cortex, parietal_lobe, temporal_lobe	ANNOTATED, INTERNAL, ncRNA, OVCODE, OVERLAPTX, OVEXON	Rybak2015	-1.25877	0.417899	0.200719	0.525615	7.31879	8.57756	1151.76	438.731	92.6884	179.43	0	239.227	0	221.7	226.168	77.6388
hsa_circ_0101960	chr14:50292584-50298079:-	NEMF	circBase	695	6	5495	chr14:50281575-50292584|chr14:50298079-50298768	ENSG00000165525.17_2	ENST00000298310.9_1	ENST00000298310.5	diencephalon, cerebellum, occipital_lobe, frontal_cortex, parietal_lobe, SY5Y_exp2_D8, temporal_lobe	ANNOTATED, CDS, coding, INTERNAL, OVCODE, OVERLAPTX, OVEXON	Rybak2015	-0.842997	0.557484	0.229022	0.554782	8.72015	9.56315	1119.76	795.201	185.377	681.833	952.892	765.528	509.995	221.7	75.3892	465.833
hsa_circ_0007695	chr14:50616725-50616948:-	SOS2	circBase	223	1	223	chr14:50612314-50616725|chr14:50616948-50619787	ENSG00000100485.11_2	ENST00000216373.9_1	NM_006939	Hs68_RNase, Hs68_control, Nhek, K562, H1hesc, Gm12878, Ag04450, A549, Sknshra, diencephalon, Sy5y_exp1_D4, cerebellum, Sy5y_exp1_D0, occipital_lobe, frontal_cortex, Sy5y_exp1_D2, parietal_lobe, SY5Y_exp2_D8, temporal_lobe, SY5Y_exp2_D4, adipose, decidua, vena_cava, right_atrium, neutophils, platelets	ANNOTATED, CDS, coding, INTERNAL, OVCODE, OVEXON	Jeck2013, Maass2017, Rybak2015, Salzman2013	-0.236825	0.848611	0.755931	0.920099	9.74259	9.97941	1503.68	2303.34	231.721	610.061	329.847	382.764	1466.24	812.899	829.282	776.388
hsa_circ_0031857	chr14:50923233-50930851:-	MAP4K5	circBase	278	3	7618	chr14:50915550-50923233|chr14:50930851-50933300	ENSG00000012983.11_2	ENST00000013125.8_1	NM_198794	K562, Bj, diencephalon, occipital_lobe, frontal_cortex, temporal_lobe, platelets	ANNOTATED, CDS, coding, INTERNAL, OVCODE, OVERLAPTX, OVEXON	Maass2017, Rybak2015, Salzman2013	1.81863	3.52747	0.209168	0.532491	7.41843	5.59979	31.9932	0	0	0	183.248	95.691	0	738.999	0	0
hsa_circ_0102036	chr14:50923233-50952912:-	MAP4K5	circBase	849	11	29679	chr14:50915550-50923233|chr14:50952912-50971517	ENSG00000012983.11_2	ENST00000013125.8_1	NM_198794	diencephalon, cerebellum, occipital_lobe, frontal_cortex, parietal_lobe, temporal_lobe	ANNOTATED, CDS, coding, INTERNAL, OVCODE, OVERLAPTX, OVEXON	Rybak2015	-0.968675	0.510975	0.482835	0.752898	6.7707	7.73938	31.9932	0	741.507	215.316	73.2994	0	509.995	0	0	0
hsa_circ_0102037	chr14:50929382-50952912:-	MAP4K5	circBase	770	10	23530	chr14:50923312-50929382|chr14:50952912-50971517	ENSG00000012983.11_2	ENST00000013125.8_1	NM_198794	diencephalon, cerebellum, occipital_lobe, frontal_cortex, parietal_lobe, temporal_lobe	ANNOTATED, CDS, coding, INTERNAL, OVCODE, OVEXON	Rybak2015	-0.700232	0.615473	0.524956	0.778561	7.31961	8.01984	95.9797	82.2622	417.098	358.859	329.847	430.609	0	0	0	310.555
hsa_circ_0031894	chr14:51489552-51492078:-	TRIM9	circBase	219	2	2526	chr14:51477212-51489552|chr14:51492078-51560835	ENSG00000100505.13_2	ENST00000298355.7_1	NM_015163	A549, diencephalon, cerebellum, occipital_lobe, frontal_cortex, parietal_lobe	ANNOTATED, CDS, coding, INTERNAL, OVCODE, OVEXON	Rybak2015, Salzman2013	0.563648	1.478	0.487126	0.755888	8.25926	7.69561	31.9932	493.573	139.033	107.658	219.898	239.227	573.745	147.8	150.778	388.194
hsa_circ_0004846	chr14:55168779-55169298:+	SAMD4A	circBase	519	1	519	chr14:55034830-55168779|chr14:55169298-55203741	ENSG00000020577.13_2	ENST00000554335.5_1	NM_015589	Hs68_RNase, Hs68_control, Nhek, K562, Huvec, Hepg2, Helas3, H1hesc, Bj, Ag04450, A549, diencephalon, cerebellum, occipital_lobe, frontal_cortex, parietal_lobe, temporal_lobe, adipose	ANNOTATED, CDS, coding, INTERNAL, OVCODE, OVEXON	Jeck2013, Maass2017, Rybak2015, Salzman2013	1.65832	3.15649	0.0231879	0.185788	9.81416	8.15584	223.953	383.89	278.065	251.202	256.548	95.691	573.745	665.099	2412.46	776.388
hsa_circ_0032029	chr14:56078736-56086030:+	KTN1	circBase	993	4	7294	chr14:56047072-56078736|chr14:56086030-56094629	ENSG00000126777.17_4	ENST00000438792.6_1	NM_182926	Nhek, Helas3, Bj, Sknshra, SY5Y_exp2_D0, diencephalon, Sy5y_exp1_D4, cerebellum, Sy5y_exp1_D0, occipital_lobe, frontal_cortex, Sy5y_exp1_D2, parietal_lobe, SY5Y_exp2_D8, temporal_lobe, SY5Y_exp2_D4, WAS2, vena_cava, right_atrium, muscle, platelets	ANNOTATED, CDS, coding, INTERNAL, OVCODE, OVERLAPTX, OVEXON, UTR5	Maass2017, Rybak2015, Salzman2013	0.255926	1.1941	0.884858	0.98141	6.76813	6.51221	95.9797	137.104	0	107.658	73.2994	143.536	63.7494	73.8999	75.3892	155.278
hsa_circ_0004110	chr14:56114742-56115588:+	KTN1	circBase	160	2	846	chr14:56113725-56114742|chr14:56115588-56116493	ENSG00000126777.17_4	ENST00000438792.6_1	NM_182926	Hs68_RNase, Hs68_control, K562, diencephalon, Sy5y_exp1_D4, cerebellum, Sy5y_exp1_D0, occipital_lobe, frontal_cortex, parietal_lobe, temporal_lobe, vena_cava, right_atrium, platelets	ANNOTATED, CDS, coding, INTERNAL, OVCODE, OVEXON	Jeck2013, Maass2017, Rybak2015, Salzman2013	0.808852	1.75182	0.436459	0.719598	8.1957	7.38685	127.973	548.414	0	35.8859	73.2994	0	382.497	0	301.557	776.388
hsa_circ_0032047	chr14:57696451-57714430:-	EXOC5	circBase	1269	11	17979	chr14:57689134-57696451|chr14:57714430-57735339	ENSG00000070367.15_2	ENST00000621441.4_1	NM_006544	A549, diencephalon, cerebellum, occipital_lobe, frontal_cortex, parietal_lobe, temporal_lobe	ANNOTATED, CDS, coding, INTERNAL, OVCODE, OVERLAPTX, OVEXON	Rybak2015, Salzman2013	-0.908908	0.532588	0.42184	0.70841	6.62902	7.53793	287.939	164.524	231.721	107.658	109.949	0	318.747	147.8	0	0
hsa_circ_0032064	chr14:58690339-58690574:+	ACTR10	circBase	154	2	235	chr14:58686447-58690339|chr14:58690574-58697116	ENSG00000131966.13_3	ENST00000545307.6_1	NM_018477	Nhek, K562, Hepg2, Bj, Sknshra, diencephalon, cerebellum, Sy5y_exp1_D0, occipital_lobe, frontal_cortex, parietal_lobe, temporal_lobe, adipose, platelets	ANNOTATED, CDS, coding, INTERNAL, OVCODE, OVEXON	Maass2017, Rybak2015, Salzman2013	-0.566006	0.675484	0.51147	0.77013	7.72296	8.28897	287.939	493.573	231.721	179.43	329.847	95.691	127.499	295.599	226.168	310.555
hsa_circ_0000542	chr14:58785259-58796887:+	ARID4A	circBase	632	6	11628	chr14:58772830-58785259|chr14:58796887-58811412	ENSG00000032219.18_2	ENST00000355431.7_1	NM_002892	cd_19, Hs68_RNase, Hs68_control, K562, diencephalon, cerebellum, occipital_lobe, frontal_cortex, parietal_lobe, temporal_lobe	ANNOTATED, CDS, coding, INTERNAL, OVCODE, OVEXON	Jeck2013, Memczak2013, Rybak2015, Salzman2013	0.352242	1.27654	0.824243	0.955204	7.22073	6.86849	95.9797	27.4207	231.721	107.658	109.949	191.382	0	295.599	75.3892	155.278
hsa_circ_0102255	chr14:59988291-60010172:-	C14orf38	circBase	926	8	21881	chr14:59978521-59988291|chr14:60010172-60011880	ENSG00000151838.11_3	ENST00000537690.6_1	NM_001164399	occipital_lobe, frontal_cortex	ANNOTATED, CDS, coding, INTERNAL, OVCODE, OVEXON	Rybak2015	-6.59399	0.0103517	0.000619222	0.0303371	2.50164	9.09562	991.79	1590.4	0	107.658	0	0	0	0	0	0
hsa_circ_0004244	chr14:61275042-61346553:+	MNAT1	circBase	493	4	71511	chr14:61264878-61275042|chr14:61346553-61434946	ENSG00000020426.10_3	ENST00000261245.8_1	NM_002431	Hs68_RNase, Hs68_control, K562, Gm12878, Bj, Ag04450, A549, diencephalon, cerebellum, occipital_lobe, frontal_cortex, parietal_lobe, temporal_lobe	ANNOTATED, CDS, coding, INTERNAL, OVCODE, OVEXON	Jeck2013, Rybak2015, Salzman2013	-0.694066	0.618109	0.454753	0.732197	7.6167	8.31077	223.953	246.786	370.753	466.517	256.548	574.146	318.747	0	0	0
hsa_circ_0008215	chr14:61278704-61346553:+	MNAT1	circBase	389	3	67849	chr14:61275146-61278704|chr14:61346553-61434946	ENSG00000020426.10_3	ENST00000261245.8_1	NM_002431	Hs68_RNase, Hs68_control, Gm12878, Sknshra, diencephalon, cerebellum, occipital_lobe, frontal_cortex, parietal_lobe, temporal_lobe, cortex	ANNOTATED, CDS, coding, INTERNAL, OVCODE, OVEXON	Jeck2013, Maass2017, Rybak2015, Salzman2013	-1.25088	0.420193	0.139126	0.435011	7.88975	9.14063	383.919	548.414	185.377	753.605	916.242	861.219	0	0	150.778	77.6388
hsa_circ_0007976	chr14:62188226-62188541:+	HIF1A	circBase	231	2	315	chr14:62162557-62188226|chr14:62188541-62193423	ENSG00000100644.16_3	ENST00000553999.5_1	NM_001530	Hs68_RNase, Hs68_control, Nhek, K562, Huvec, Helas3, H1hesc, Gm12878, Bj, Ag04450, A549, Sknshra, SY5Y_exp2_D0, diencephalon, cerebellum, occipital_lobe, frontal_cortex, Sy5y_exp1_D2, parietal_lobe, temporal_lobe, WAS2, fibroblasts, platelets	ANNOTATED, CDS, coding, INTERNAL, OVCODE, OVEXON	Jeck2013, Maass2017, Rybak2015, Salzman2013	0.727242	1.65547	0.411931	0.703514	7.74557	7.01832	31.9932	301.628	92.6884	71.7719	109.949	0	382.497	295.599	75.3892	310.555
hsa_circ_0032148	chr14:63447589-63483672:-	KCNH5	circBase	869	5	36083	chr14:63417277-63447589|chr14:63483672-63511831	ENSG00000140015.19_2	ENST00000322893.11_1	NM_139318	Hepg2, Helas3, diencephalon, cerebellum, occipital_lobe, frontal_cortex, parietal_lobe, temporal_lobe	ANNOTATED, CDS, coding, INTERNAL, OVCODE, OVEXON	Rybak2015, Salzman2013	-2.74052	0.149631	0.052197	0.281713	5.06111	7.80163	0	0	417.098	574.175	109.949	0	0	147.8	0	0
hsa_circ_0102377	chr14:64465631-64489581:+	SYNE2	circBase	2284	12	23950	chr14:64465046-64465631|chr14:64489581-64490974	ENSG00000054654.16_3	ENST00000357395.7_1	ENST00000357395.3	diencephalon, cerebellum, Sy5y_exp1_D0, occipital_lobe, frontal_cortex, parietal_lobe, temporal_lobe	ANNOTATED, coding, INTERNAL, OVCODE, OVEXON, UTR5	Rybak2015	3.72538	13.2266	0.00386226	0.0797788	7.98916	4.26379	63.9865	0	0	0	0	143.536	637.494	0	301.557	155.278
hsa_circ_0003028	chr14:66028054-66028484:+	FUT8	circBase	430	1	430	chr14:65922436-66028054|chr14:66028484-66082695	ENSG00000033170.16_3	ENST00000360689.9_1	NM_178155	Hs68_RNase, Hs68_control, Nhek, K562, Hepg2, Helas3, H1hesc, Gm12878, Bj, Ag04450, A549, Nhlf, Sknshra, Mcf7, SY5Y_exp2_D0, diencephalon, Sy5y_exp1_D4, cerebellum, Sy5y_exp1_D0, occipital_lobe, frontal_cortex, Sy5y_exp1_D2, parietal_lobe, temporal_lobe, chondrocytes, WAS2, ada_scid, cortex, vena_cava, LCL, HUAEC, platelets	ANNOTATED, CDS, coding, INTERNAL, OVCODE, OVEXON, UTR5	Jeck2013, Maass2017, Rybak2015, Salzman2013	-1.23188	0.425764	0.0597559	0.300927	10.1196	11.3515	3167.33	3263.07	1575.7	1937.84	3078.57	3109.96	509.995	443.399	376.946	1009.3
hsa_circ_0102436	chr14:66082695-66096324:+	FUT8	circBase	394	3	13629	chr14:66028484-66082695|chr14:66096324-66135960	ENSG00000033170.16_3	ENST00000360689.9_1	ENST00000358307.2	diencephalon, cerebellum, occipital_lobe, frontal_cortex, parietal_lobe, temporal_lobe	ANNOTATED, CDS, coding, INTERNAL, OVCODE, OVEXON, UTR5	Rybak2015	-3.62477	0.0810653	4.50503e-05	0.00828074	5.76643	9.39121	703.851	932.304	417.098	968.92	293.197	143.536	63.7494	0	0	0
hsa_circ_0032249	chr14:66188492-66200099:+	FUT8	circBase	575	3	11607	chr14:66136198-66188492|chr14:66200099-66208810	ENSG00000033170.16_3	ENST00000360689.9_1	NM_178155	Nhek, Gm12878, diencephalon, cerebellum, occipital_lobe, frontal_cortex, parietal_lobe, temporal_lobe	ANNOTATED, CDS, coding, INTERNAL, OVCODE, OVERLAPTX, OVEXON	Rybak2015, Salzman2013	-2.10535	0.232394	0.0383512	0.237465	5.6948	7.80015	159.966	191.945	417.098	71.7719	256.548	191.382	0	0	0	0
hsa_circ_0032254	chr14:67431907-67525503:+	GPHN	circBase	316	3	93596	chr14:67389655-67431907|chr14:67525503-67555699	ENSG00000171723.15_3	ENST00000315266.9_1	NM_020806	Hsmm, Hepg2, Helas3, H1hesc, Gm12878, Bj, A549, Sknshra, Mcf7	ANNOTATED, CDS, coding, INTERNAL, OVCODE, OVERLAPTX, OVEXON	Salzman2013	1.94672	3.85496	0.0966301	0.370727	7.62561	5.67889	63.9865	109.683	46.3442	0	0	382.764	318.747	0	0	232.916
hsa_circ_0032261	chr14:67736417-67770316:+	MPP5	circBase	1277	7	33899	chr14:67708250-67736417|chr14:67770316-67779243	ENSG00000072415.8_3	ENST00000261681.8_1	NM_022474	Nhek, K562, Hepg2, Helas3, H1hesc, Gm12878, diencephalon, cerebellum, occipital_lobe, frontal_cortex, parietal_lobe, temporal_lobe, ada_scid, cortex, vena_cava, platelets	ANNOTATED, CDS, coding, INTERNAL, OVCODE, OVEXON, UTR5	Maass2017, Rybak2015, Salzman2013	0.0340765	1.0239	1	1	8.23381	8.19973	127.973	164.524	139.033	681.833	329.847	526.3	318.747	369.499	150.778	77.6388
hsa_circ_0102469	chr14:67812484-67814170:-	ATP6V1D	circBase	149	2	1686	chr14:67810155-67812484|chr14:67814170-67815753	ENSG00000100554.11_3	ENST00000554087.5_1	ENST00000216442.7	diencephalon, occipital_lobe, frontal_cortex, parietal_lobe	ANNOTATED, CDS, coding, INTERNAL, OVCODE, OVEXON	Rybak2015	0.303916	1.23449	0.877999	0.976731	6.5849	6.28098	63.9865	0	46.3442	71.7719	183.248	143.536	0	0	150.778	155.278
hsa_circ_0006278	chr14:68151731-68157138:-	RDH11	circBase	400	2	5407	chr14:68145140-68151731|chr14:68157138-68157856	ENSG00000072042.12_3	ENST00000381346.8_1	NM_016026	Hs68_RNase, Hs68_control, Nhek, K562, Hepg2, Helas3, H1hesc, Gm12878, Bj, Ag04450, A549, Sknshra, Mcf7, diencephalon, cerebellum, occipital_lobe, frontal_cortex, parietal_lobe, temporal_lobe, platelets	ANNOTATED, CDS, coding, INTERNAL, OVCODE, OVEXON	Jeck2013, Maass2017, Rybak2015, Salzman2013	2.00704	4.01957	0.070419	0.325517	7.55967	5.55263	31.9932	54.8414	46.3442	35.8859	36.6497	0	254.998	73.8999	452.335	155.278
hsa_circ_0000545	chr14:68228082-68229536:-	ZFYVE26	circBase	577	3	1454	chr14:68222862-68228082|chr14:68229536-68232943	ENSG00000072121.15_3	ENST00000394455.6_1	NM_015346	cd_19, Hs68_RNase, Hs68_control, Nhek, K562, Hepg2, Helas3, H1hesc, Gm12878, Bj, Ag04450, A549, Sknshra, diencephalon, cerebellum, Sy5y_exp1_D0, occipital_lobe, frontal_cortex, parietal_lobe, temporal_lobe, WAS2	ANNOTATED, CDS, coding, INTERNAL, OVCODE, OVEXON	Jeck2013, Maass2017, Memczak2013, Rybak2015, Salzman2013	-2.48875	0.178161	0.0526926	0.282266	4.9939	7.48265	351.926	82.2622	139.033	71.7719	219.898	0	127.499	0	0	0
hsa_circ_0032352	chr14:70125229-70125430:+	KIAA0247	circBase	201	1	201	chr14:70078545-70125229|chr14:70125430-70170111	ENSG00000100647.7_2	ENST00000342745.4_1	NM_014734	K562, Gm12878, Bj, Ag04450, Sknshra, cerebellum, occipital_lobe, frontal_cortex, parietal_lobe	ANNOTATED, CDS, coding, INTERNAL, OVCODE, OVEXON, UTR5	Rybak2015, Salzman2013	-2.80218	0.14337	0.0473968	0.267787	4.99212	7.79431	479.898	438.731	0	0	146.599	0	127.499	0	0	0
hsa_circ_0007996	chr14:71492833-71502874:+	PCNX	circBase	684	6	10041	chr14:71489949-71492833|chr14:71502874-71511849	ENSG00000100731.15_3	ENST00000304743.6_2	NM_014982	Hs68_RNase, Hs68_control, Nhek, Huvec, Hepg2, Helas3, H1hesc, Gm12878, Bj, Ag04450, A549, diencephalon, cerebellum, occipital_lobe, frontal_cortex, parietal_lobe, temporal_lobe	ANNOTATED, CDS, coding, INTERNAL, OVCODE, OVEXON	Jeck2013, Rybak2015, Salzman2013	1.22355	2.33521	0.342229	0.642644	7.36937	6.14582	63.9865	137.104	46.3442	71.7719	0	0	63.7494	0	753.892	0
chr14:71880664-71996087:+	chr14:71880664-71996087:+	SIPA1L1	CIRCexplorer2	271	4	115423	chr14:71867635-71880664|chr14:71996087-72040205	ENSG00000197555.9_3	ENST00000556408.5_1	NA	NA	NA	NA	-0.263348	0.833152	0.929084	0.998086	7.08668	7.35002	383.919	137.104	0	71.7719	183.248	0	0	147.8	452.335	77.6388
hsa_circ_0102543	chr14:73181130-73198642:-	DPF3	circBase	303	3	17512	chr14:73159921-73181130|chr14:73198642-73219971	ENSG00000205683.11_2	ENST00000556509.5_1	NM_012074	cerebellum	ANNOTATED, CDS, coding, INTERNAL, OVCODE, OVERLAPTX, OVEXON	Rybak2015	-0.604699	0.657609	0.62265	0.839981	7.15481	7.75951	191.959	767.78	0	71.7719	0	95.691	0	443.399	0	155.278
[truncated: 1,818 more rows]
