# Supplementary material for: Knockdown of hsa_circ_0008922 inhibits the progression of glioma
Source: PeerJ. 2022 Dec 20;10:e14552. doi: 10.7717/peerj.14552 (PMC9784332; doi:10.7717/peerj.14552)
Supplement: Supplemental Information 6 — Raw data for Figure 8. [file peerj-10-14552-s006.xlsx]

## Sheet: Sheet1
node1	node2	PCCTotal Score	Total Energy	|Total Energy|
hsa_circ_0008922	hsa-let-7e-5p	158	-16.84	16.84
hsa_circ_0008922	hsa-miR-506-5p	155	-16.57	16.57
hsa_circ_0008922	hsa-let-7b-5p	154	-17.03	17.03
hsa_circ_0008922	hsa-let-7c-5p	154	-15.93	15.93
hsa_circ_0008922	hsa-let-7g-5p	154	-14.88	14.88
hsa_circ_0008922	hsa-mir-98-5p	150	-12	12
hsa_circ_0008922	hsa-let-7d-5p	150	-14.79	14.79
hsa_circ_0008922	hsa-let-7i-5p	147	-13.24	13.24
hsa_circ_0008922	hsa-miR-377-3p	143	-13.37	13.37
hsa_circ_0008922	hsa-mir-605-3p	157	-14.73	14.73
hsa_circ_0008922	hsa-let-7a-5p	158	-15.82	15.82
hsa_circ_0008922	hsa-let-7f-5p	150	-12	12
hsa_circ_0008922	hsa-miR-4458	156	-19.13	19.13
hsa_circ_0008922	hsa-miR-4500	146	-11.62	11.62
