# Supplementary material for: Knockdown of hsa_circ_0008922 inhibits the progression of glioma
Source: PeerJ. 2022 Dec 20;10:e14552. doi: 10.7717/peerj.14552 (PMC9784332; doi:10.7717/peerj.14552)
Supplement: Supplemental Information 7 — Raw data for Figure 8. [file peerj-10-14552-s007.xlsx]

## Sheet: Sheet1
node1	node2	PCC	|PCC|
hsa-let-7c-5p	TRIM67	-0.408788	0.408788
hsa-let-7e-5p	FAM104A	-0.377413	0.377413
hsa-let-7e-5p	TRIM67	-0.373914	0.373914
hsa-let-7e-5p	POLL	-0.365456	0.365456
hsa-let-7e-5p	POLR3D	-0.351674	0.351674
hsa-let-7e-5p	ABL2	-0.342386	0.342386
hsa-let-7c-5p	POLL	-0.332886	0.332886
hsa-let-7c-5p	XYLT1	-0.328351	0.328351
hsa-let-7e-5p	FGF11	-0.327709	0.327709
hsa-let-7e-5p	LINGO1	-0.321816	0.321816
hsa-let-7e-5p	HSPA14	-0.314913	0.314913
hsa-let-7e-5p	TAF9B	-0.301618	0.301618
hsa-let-7e-5p	SEMA4G	-0.28507	0.28507
hsa-let-7e-5p	ONECUT2	-0.280346	0.280346
hsa-let-7b-5p	CDC34	-0.275342	0.275342
hsa-let-7e-5p	SLC16A9	-0.271784	0.271784
hsa-let-7e-5p	RUFY3	-0.265896	0.265896
hsa-let-7e-5p	ZNF275	-0.261517	0.261517
hsa-let-7e-5p	RNF165	-0.261347	0.261347
hsa-let-7e-5p	BEND4	-0.255551	0.255551
hsa-let-7e-5p	SPRYD4	-0.253405	0.253405
hsa-let-7e-5p	PRTG	-0.242928	0.242928
hsa-let-7e-5p	LIN28A	-0.236249	0.236249
hsa-let-7e-5p	SUB1	-0.234089	0.234089
hsa-let-7b-5p	APBB3	-0.23207	0.23207
hsa-let-7e-5p	SMARCAD1	-0.230297	0.230297
hsa-let-7e-5p	DDX19B	-0.226094	0.226094
hsa-let-7e-5p	ZBTB8B	-0.225214	0.225214
hsa-let-7c-5p	KCNC2	-0.219601	0.219601
hsa-let-7b-5p	PCGF3	-0.218312	0.218312
hsa-let-7b-5p	POLL	-0.217388	0.217388
hsa-let-7e-5p	ARHGAP28	-0.216033	0.216033
hsa-let-7c-5p	PCGF3	-0.214345	0.214345
hsa-let-7e-5p	IGF1R	-0.209821	0.209821
hsa-let-7e-5p	RNF20	-0.195366	0.195366
hsa-let-7e-5p	DIP2A	-0.192403	0.192403
hsa-let-7c-5p	FAM104A	-0.19054	0.19054
hsa-let-7b-5p	IL13	-0.18788	0.18788
hsa-let-7e-5p	CBX5	-0.186608	0.186608
hsa-let-7b-5p	DDTL	-0.180576	0.180576
hsa-let-7c-5p	ONECUT2	-0.170007	0.170007
hsa-let-7e-5p	XYLT1	-0.169983	0.169983
hsa-let-7b-5p	C14orf28	-0.168327	0.168327
hsa-let-7b-5p	ABCC5	-0.16671	0.16671
hsa-let-7e-5p	C5orf51	-0.165229	0.165229
hsa-let-7e-5p	SLC25A27	-0.162974	0.162974
hsa-let-7a-5p	NME4	-0.161181	0.161181
hsa-let-7e-5p	CDC25A	-0.157496	0.157496
hsa-let-7b-5p	GPCPD1	-0.15507	0.15507
hsa-let-7e-5p	FNIP1	-0.154894	0.154894
hsa-let-7e-5p	DPP6	-0.152485	0.152485
hsa-let-7b-5p	SLC25A27	-0.150321	0.150321
hsa-let-7a-5p	PCGF3	-0.146301	0.146301
hsa-let-7b-5p	SENP5	-0.144664	0.144664
hsa-let-7c-5p	GPR26	-0.14413	0.14413
hsa-let-7e-5p	SMC1A	-0.138559	0.138559
hsa-let-7b-5p	ZNF784	-0.136841	0.136841
hsa-let-7c-5p	ABL2	-0.13528	0.13528
hsa-let-7a-5p	C18orf21	-0.134035	0.134035
hsa-let-7b-5p	ACTA1	-0.130922	0.130922
hsa-let-7b-5p	EEF2K	-0.129691	0.129691
hsa-let-7b-5p	WDR37	-0.128783	0.128783
hsa-let-7b-5p	MDM4	-0.128067	0.128067
hsa-let-7b-5p	LINGO1	-0.127541	0.127541
hsa-let-7b-5p	KLHL31	-0.127065	0.127065
hsa-let-7b-5p	HOOK1	-0.127058	0.127058
hsa-let-7b-5p	C18orf21	-0.126882	0.126882
hsa-let-7c-5p	ACSL6	-0.126511	0.126511
hsa-let-7e-5p	SENP5	-0.125603	0.125603
hsa-let-7b-5p	SEMA4G	-0.125454	0.125454
hsa-let-7a-5p	DDTL	-0.123225	0.123225
hsa-let-7b-5p	LIMD2	-0.122642	0.122642
hsa-let-7c-5p	ARHGAP28	-0.122632	0.122632
hsa-let-7b-5p	ACVR2A	-0.122104	0.122104
hsa-let-7b-5p	HSPA14	-0.120548	0.120548
hsa-let-7c-5p	FGF11	-0.120316	0.120316
hsa-let-7b-5p	NME4	-0.118984	0.118984
hsa-let-7e-5p	SOCS4	-0.118417	0.118417
hsa-miR-506-5p	PAN3	-0.116477	0.116477
hsa-let-7a-5p	C14orf28	-0.115456	0.115456
hsa-let-7e-5p	ABCC5	-0.114518	0.114518
hsa-let-7e-5p	MASP1	-0.114432	0.114432
hsa-let-7c-5p	IGF1R	-0.114343	0.114343
hsa-let-7a-5p	MDM4	-0.113882	0.113882
hsa-let-7b-5p	ADRB3	-0.113384	0.113384
hsa-let-7c-5p	TAF9B	-0.111721	0.111721
hsa-let-7b-5p	FIGNL2	-0.110893	0.110893
hsa-let-7e-5p	ERCC4	-0.110249	0.110249
hsa-let-7e-5p	NGF	-0.107614	0.107614
hsa-let-7e-5p	ZNF689	-0.106821	0.106821
hsa-let-7e-5p	PARP8	-0.105889	0.105889
hsa-let-7a-5p	ACTA1	-0.104794	0.104794
hsa-let-7b-5p	EFHD2	-0.104658	0.104658
hsa-let-7e-5p	BACH1	-0.103709	0.103709
hsa-let-7b-5p	POGZ	-0.102946	0.102946
hsa-let-7c-5p	AGAP1	-0.101478	0.101478
hsa-let-7b-5p	RUFY3	-0.100095	0.100095
hsa-let-7a-5p	ZNF784	-0.0982791	0.0982791
hsa-let-7e-5p	TMEM167A	-0.0977042	0.0977042
hsa-let-7b-5p	YOD1	-0.0971608	0.0971608
hsa-let-7b-5p	SUB1	-0.0966008	0.0966008
hsa-let-7b-5p	BEND4	-0.0965402	0.0965402
hsa-let-7e-5p	PDPR	-0.0959264	0.0959264
hsa-let-7a-5p	E2F2	-0.0917341	0.0917341
hsa-let-7b-5p	AMT	-0.0913909	0.0913909
hsa-let-7b-5p	GPR26	-0.0896099	0.0896099
hsa-let-7a-5p	MASP1	-0.0885455	0.0885455
hsa-let-7e-5p	CLCN5	-0.0875933	0.0875933
hsa-let-7c-5p	ACTA1	-0.0872025	0.0872025
hsa-let-7e-5p	PLEKHA8	0.0874399	0.0874399
hsa-let-7b-5p	SIGLEC14	0.0875256	0.0875256
hsa-let-7b-5p	ZNF689	0.0883275	0.0883275
hsa-let-7c-5p	FASLG	0.0892288	0.0892288
hsa-let-7b-5p	CADM2	0.0895582	0.0895582
hsa-let-7b-5p	MAP3K9	0.0915361	0.0915361
hsa-let-7b-5p	IGDCC4	0.0916504	0.0916504
hsa-let-7b-5p	TAF9B	0.0916683	0.0916683
hsa-let-7c-5p	PRTG	0.091989	0.091989
hsa-let-7b-5p	ASAP1	0.0928549	0.0928549
hsa-let-7b-5p	PRLR	0.0937228	0.0937228
hsa-let-7a-5p	AEN	0.0942568	0.0942568
hsa-let-7a-5p	RDX	0.0949319	0.0949319
hsa-let-7b-5p	MAP3K1	0.0949451	0.0949451
hsa-let-7b-5p	GALC	0.0950232	0.0950232
hsa-let-7b-5p	SMARCAD1	0.0966426	0.0966426
hsa-let-7b-5p	TMEM167A	0.0967888	0.0967888
hsa-let-7b-5p	LRIG2	0.0968312	0.0968312
hsa-let-7b-5p	PLEKHA8	0.0973089	0.0973089
hsa-let-7c-5p	RASGRP1	0.0994695	0.0994695
hsa-let-7e-5p	SIGLEC14	0.102458	0.102458
hsa-let-7a-5p	UTRN	0.10277	0.10277
hsa-let-7b-5p	HMGA2	0.103319	0.103319
hsa-let-7b-5p	HOXA1	0.103361	0.103361
hsa-let-7b-5p	CDKN1A	0.103564	0.103564
hsa-let-7b-5p	ZBP1	0.103885	0.103885
hsa-let-7b-5p	ABL2	0.105321	0.105321
hsa-let-7a-5p	ESR2	0.107113	0.107113
hsa-let-7e-5p	PLXNC1	0.108314	0.108314
hsa-let-7b-5p	TGFBR3	0.108575	0.108575
hsa-let-7c-5p	DTX4	0.109081	0.109081
hsa-let-7b-5p	RGS16	0.109355	0.109355
hsa-let-7b-5p	TGFBR1	0.10986	0.10986
hsa-let-7b-5p	SLC31A2	0.110231	0.110231
hsa-let-7b-5p	ELF4	0.111139	0.111139
hsa-let-7b-5p	FASLG	0.111663	0.111663
hsa-miR-506-5p	TSHZ2	0.112212	0.112212
hsa-let-7b-5p	EEA1	0.11232	0.11232
hsa-let-7b-5p	PPP1R15B	0.115086	0.115086
hsa-let-7e-5p	SLC2A12	0.115276	0.115276
hsa-let-7b-5p	ATP2A2	0.115775	0.115775
hsa-let-7b-5p	KCTD21	0.116275	0.116275
hsa-let-7b-5p	DMD	0.116282	0.116282
hsa-let-7a-5p	CADM2	0.116764	0.116764
hsa-let-7a-5p	STARD13	0.117054	0.117054
hsa-let-7b-5p	TMC7	0.118315	0.118315
hsa-let-7b-5p	TRIM71	0.118752	0.118752
hsa-let-7b-5p	PDP2	0.118811	0.118811
hsa-let-7b-5p	ATP8B4	0.119049	0.119049
hsa-let-7a-5p	SLC22A23	0.120394	0.120394
hsa-let-7b-5p	HIP1	0.121029	0.121029
hsa-let-7a-5p	GAS7	0.121924	0.121924
hsa-let-7b-5p	AEN	0.122385	0.122385
hsa-let-7b-5p	COL4A2	0.122488	0.122488
hsa-let-7e-5p	MAP3K9	0.122715	0.122715
hsa-let-7b-5p	SLC10A7	0.12328	0.12328
hsa-let-7b-5p	KLF8	0.123836	0.123836
hsa-let-7b-5p	NME6	0.124265	0.124265
hsa-let-7b-5p	PIK3IP1	0.124301	0.124301
hsa-let-7b-5p	IKZF2	0.124359	0.124359
hsa-let-7a-5p	FGD6	0.124936	0.124936
hsa-let-7c-5p	BIN3	0.125732	0.125732
hsa-let-7b-5p	PAPPA	0.126609	0.126609
hsa-let-7a-5p	PDPR	0.127173	0.127173
hsa-let-7b-5p	XYLT1	0.127206	0.127206
hsa-let-7a-5p	FRMD4B	0.128314	0.128314
hsa-let-7a-5p	PARP8	0.128432	0.128432
hsa-let-7e-5p	TSEN34	0.131927	0.131927
hsa-let-7a-5p	ATP2A2	0.132269	0.132269
hsa-let-7b-5p	COL4A1	0.134034	0.134034
hsa-let-7e-5p	DTX2	0.134241	0.134241
hsa-miR-506-5p	SGIP1	0.13547	0.13547
hsa-let-7b-5p	FGD6	0.135781	0.135781
hsa-let-7e-5p	IMPG2	0.136188	0.136188
hsa-let-7e-5p	CD59	0.136342	0.136342
hsa-let-7b-5p	GNPTAB	0.137109	0.137109
hsa-let-7a-5p	KLF8	0.137344	0.137344
hsa-let-7e-5p	ZNF644	0.137658	0.137658
hsa-let-7b-5p	PDE12	0.138131	0.138131
hsa-let-7b-5p	INSR	0.139314	0.139314
hsa-let-7b-5p	GRPEL2	0.140989	0.140989
hsa-let-7a-5p	PLEKHA8	0.14202	0.14202
hsa-let-7b-5p	BACH1	0.143109	0.143109
hsa-let-7c-5p	PBX3	0.144142	0.144142
hsa-let-7e-5p	GXYLT1	0.146218	0.146218
hsa-let-7b-5p	RNF20	0.147053	0.147053
hsa-let-7b-5p	PTAFR	0.147881	0.147881
hsa-let-7b-5p	ENTPD7	0.150685	0.150685
hsa-let-7c-5p	B3GNT7	0.150752	0.150752
hsa-let-7b-5p	GYG2	0.151777	0.151777
hsa-let-7e-5p	WNT9B	0.151831	0.151831
hsa-let-7b-5p	CPEB2	0.155747	0.155747
hsa-let-7b-5p	UTRN	0.155785	0.155785
hsa-let-7a-5p	EIF4G2	0.156082	0.156082
hsa-let-7a-5p	SNX30	0.15676	0.15676
hsa-let-7e-5p	ZNF784	0.158544	0.158544
hsa-let-7b-5p	EDEM3	0.159588	0.159588
hsa-let-7b-5p	PLXNC1	0.15992	0.15992
hsa-let-7b-5p	UGCG	0.159921	0.159921
hsa-let-7c-5p	FGD6	0.160034	0.160034
hsa-let-7b-5p	PDPR	0.160151	0.160151
hsa-let-7b-5p	SLC22A23	0.161946	0.161946
hsa-let-7e-5p	GYG2	0.162838	0.162838
hsa-let-7b-5p	ARL5A	0.164078	0.164078
hsa-let-7a-5p	OSMR	0.168389	0.168389
hsa-let-7e-5p	PRPF38B	0.168763	0.168763
hsa-let-7e-5p	LIPH	0.169982	0.169982
hsa-let-7b-5p	SRGAP1	0.172771	0.172771
hsa-let-7b-5p	FNDC3B	0.174929	0.174929
hsa-let-7c-5p	BACH1	0.175643	0.175643
hsa-let-7b-5p	ERCC4	0.176251	0.176251
hsa-let-7b-5p	SNX30	0.176526	0.176526
hsa-let-7b-5p	IMPG2	0.177458	0.177458
hsa-let-7e-5p	ZBP1	0.177856	0.177856
hsa-let-7e-5p	TMC7	0.178718	0.178718
hsa-let-7c-5p	SRGAP1	0.180871	0.180871
hsa-let-7a-5p	KIAA1958	0.181144	0.181144
hsa-let-7b-5p	ERCC6	0.185599	0.185599
hsa-let-7b-5p	PARP8	0.185651	0.185651
hsa-let-7e-5p	ATP8B4	0.186351	0.186351
hsa-let-7a-5p	FZD3	0.187837	0.187837
hsa-let-7e-5p	CPA4	0.187913	0.187913
hsa-let-7b-5p	CEP120	0.189628	0.189628
hsa-let-7c-5p	ADAMTS15	0.190772	0.190772
hsa-let-7c-5p	GAS7	0.191614	0.191614
hsa-let-7b-5p	RDX	0.194033	0.194033
hsa-let-7b-5p	TRANK1	0.194344	0.194344
hsa-let-7b-5p	GAN	0.194349	0.194349
hsa-let-7e-5p	TGFBR3	0.195708	0.195708
hsa-let-7a-5p	RANBP2	0.196944	0.196944
hsa-let-7b-5p	SKIL	0.19738	0.19738
hsa-let-7e-5p	PTAFR	0.197464	0.197464
hsa-let-7b-5p	C5orf51	0.197649	0.197649
hsa-let-7e-5p	GJC1	0.198043	0.198043
hsa-let-7e-5p	PIGA	0.198127	0.198127
hsa-let-7a-5p	MTDH	0.198156	0.198156
hsa-let-7b-5p	FNDC3A	0.198479	0.198479
hsa-let-7b-5p	ITGB3	0.201754	0.201754
hsa-let-7e-5p	FZD3	0.202548	0.202548
hsa-let-7b-5p	THOC2	0.204398	0.204398
hsa-let-7e-5p	RASGRP1	0.20467	0.20467
hsa-let-7e-5p	CLDN16	0.205406	0.205406
hsa-let-7b-5p	SMC1A	0.208394	0.208394
hsa-let-7b-5p	FZD3	0.208685	0.208685
hsa-let-7b-5p	OSMR	0.210166	0.210166
hsa-let-7b-5p	LAMP2	0.211536	0.211536
hsa-let-7a-5p	IMPG2	0.212166	0.212166
hsa-let-7e-5p	ITGB3	0.213001	0.213001
hsa-let-7b-5p	KIAA1958	0.213115	0.213115
hsa-let-7c-5p	MASP1	0.213601	0.213601
hsa-let-7c-5p	ASAP1	0.216182	0.216182
hsa-let-7a-5p	AGAP1	0.222549	0.222549
hsa-let-7c-5p	KIAA1958	0.22282	0.22282
hsa-let-7b-5p	AGAP1	0.225685	0.225685
hsa-let-7e-5p	ADRB2	0.226212	0.226212
hsa-let-7e-5p	HOXA1	0.228295	0.228295
hsa-let-7e-5p	SLC22A23	0.229141	0.229141
hsa-let-7b-5p	ACER2	0.230954	0.230954
hsa-let-7b-5p	MTDH	0.242177	0.242177
hsa-let-7e-5p	AMOT	0.242216	0.242216
hsa-let-7e-5p	LIN28B	0.242219	0.242219
hsa-let-7c-5p	EPHA4	0.246971	0.246971
hsa-let-7e-5p	IRS2	0.248994	0.248994
hsa-miR-506-5p	VSTM2L	0.249211	0.249211
hsa-let-7e-5p	CRTAM	0.251384	0.251384
hsa-let-7e-5p	C19orf47	0.257223	0.257223
hsa-let-7c-5p	FZD3	0.260801	0.260801
hsa-let-7e-5p	GNG5	0.26543	0.26543
hsa-let-7c-5p	NRAS	0.266749	0.266749
hsa-let-7e-5p	PLA2G3	0.272094	0.272094
hsa-miR-506-5p	COX11	0.273066	0.273066
hsa-let-7b-5p	TMPPE	0.274972	0.274972
hsa-let-7e-5p	FGD6	0.280691	0.280691
hsa-let-7e-5p	STK40	0.282555	0.282555
hsa-let-7c-5p	OSBPL3	0.285478	0.285478
hsa-let-7e-5p	ABCB9	0.29262	0.29262
hsa-let-7e-5p	P4HA2	0.296475	0.296475
hsa-let-7e-5p	STX3	0.30329	0.30329
hsa-let-7e-5p	TRANK1	0.332098	0.332098
hsa-let-7e-5p	OSMR	0.33313	0.33313
hsa-let-7c-5p	ZNF644	0.339446	0.339446
hsa-let-7e-5p	RALB	0.356729	0.356729
hsa-let-7e-5p	XK	0.363431	0.363431
hsa-let-7e-5p	VAV3	0.373788	0.373788
hsa-let-7c-5p	DMD	0.376049	0.376049
hsa-let-7e-5p	RGS6	0.37871	0.37871
hsa-let-7e-5p	GAS7	0.416398	0.416398
hsa-let-7e-5p	OPA3	0.428658	0.428658
hsa-let-7e-5p	XKR8	0.446437	0.446437
