# Supplementary material for: Knockdown of hsa_circ_0008922 inhibits the progression of glioma
Source: PeerJ. 2022 Dec 20;10:e14552. doi: 10.7717/peerj.14552 (PMC9784332; doi:10.7717/peerj.14552)
Supplement: Supplemental Information 9 [file peerj-10-14552-s009.xlsx]

## Sheet: Figure 2
	Figure 2A Raw data for expression of circ008922 in 10 normal tissues and 40 tumor tissues measured by RT-qPCR								Figure 2B The expression of hsa_circ_0008922 between the groups of normal brain tissues (n=10), low-grade tumor (n=20) and high-grade tumor (n=20)
	Sample Name	GAPDH	hsa-circ008922	Delta Ct	Delta Delta Ct	RQ（2-Delta Delta Ct）			Sample Name	GAPDH	hsa-circ008922	Delta Ct	Delta Delta Ct	RQ（2-Delta Delta Ct）
				14.4423
	N1	15.2224	28.2646	13.0422	-1.39989	2.63882			N1	15.2224	28.2646	13.0422	-1.39989	2.63882
	N2	14.613	28.8886	14.2756	-0.166501	1.12233			N2	14.613	28.8886	14.2756	-0.166501	1.12233
	N3	15.718	27.6711	11.9532	-2.48894	5.61367			N3	15.718	27.6711	11.9532	-2.48894	5.61367
	N4	14.7461	28.4718	13.7257	-0.7164	1.64308			N4	14.7461	28.4718	13.7257	-0.7164	1.64308
	N5	15.0449	28.936	13.8911	-0.550973	1.46507			N5	15.0449	28.936	13.8911	-0.550973	1.46507
	N6	12.192	27.8873	15.6953	1.25317	0.419527			N6	12.192	27.8873	15.6953	1.25317	0.419527
	N7	11.2457	28.3919	17.1462	2.70413	0.153453			N7	11.2457	28.3919	17.1462	2.70413	0.153453
	N8	15.9054	28.8997	12.9943	-1.44783	2.72798			N8	15.9054	28.8997	12.9943	-1.44783	2.72798
	N9	12.8637	29.3359	16.4722	2.03007	0.244843			N9	12.8637	29.3359	16.4722	2.03007	0.244843
	N10	14.9321	30.1595	15.2274	0.7853	0.580231			N10	14.9321	30.1595	15.2274	0.7853	0.580231
	T1	17.5615	32.034	14.4725	0.0302356	0.97926			Low-grade tumor-1	17.5615	32.034	14.4725	0.0302356	0.97926
	T2	17.2622	28.7365	11.4743	-2.968	7.82449			Low-grade tumor-2	17.9071	30.1753	12.2682	-2.17413	4.51313
	T3	17.9071	30.1753	12.2682	-2.17413	4.51313			Low-grade tumor-3	18.2893	30.1568	11.8675	-2.57477	5.95774
	T4	18.2893	30.1568	11.8675	-2.57477	5.95774			Low-grade tumor-4	17.7507	29.8952	12.1445	-2.29782	4.91713
	T5	18.2719	29.4975	11.2256	-3.21672	9.2967			Low-grade tumor-5	16.4876	30.6989	14.2114	-0.230942	1.1736
	T6	17.7507	29.8952	12.1445	-2.29782	4.91713			Low-grade tumor-6	16.2376	30.7617	14.524	0.0817345	0.944921
	T7	18.5963	29.7493	11.153	-3.28928	9.77622			Low-grade tumor-7	17.2149	30.6989	13.484	-0.958262	1.94297
	T8	16.4876	30.6989	14.2114	-0.230942	1.1736			Low-grade tumor-8	16.734	28.7932	12.0592	-2.38311	5.2166
	T9	16.8271	27.9513	11.1242	-3.31812	9.97361			Low-grade tumor-9	16.4181	29.8388	13.4206	-1.02168	2.03028
	T10	16.2376	30.7617	14.524	0.0817345	0.944921			Low-grade tumor-10	15.894	29.1013	13.2073	-1.23506	2.3539
	T11	17.2149	30.6989	13.484	-0.958262	1.94297			Low-grade tumor-11	18.0507	30.0589	12.0081	-2.43416	5.4045
	T12	17.3001	29.1618	11.8617	-2.58059	5.98184			Low-grade tumor-12	17.6314	30.6164	12.985	-1.45728	2.74591
	T13	19.0465	30.8408	11.7943	-2.648	6.268			Low-grade tumor-13	18.0733	31.0525	12.9792	-1.4631	2.75701
	T14	18.9134	29.9123	10.9988	-3.44347	10.879			Low-grade tumor-14	16.241	29.2166	12.9756	-1.46674	2.76396
	T15	16.734	28.7932	12.0592	-2.38311	5.2166			Low-grade tumor-15	17.0212	28.9173	11.8962	-2.54615	5.84075
	T16	16.4181	29.8388	13.4206	-1.02168	2.03028			Low-grade tumor-16	18.704	31.6646	12.9606	-1.48174	2.79286
	T17	18.8617	29.5661	10.7044	-3.73786	13.3416			Low-grade tumor-17	17.1674	30.0566	12.8892	-1.5531	2.93446
	T18	15.894	29.1013	13.2073	-1.23506	2.3539			Low-grade tumor-18	18.101	30.622	12.5211	-1.92125	3.78751
	T19	18.0319	29.8044	11.7725	-2.66978	6.36331			Low-grade tumor-19	18.7848	31.2614	12.4765	-1.96577	3.90622
	T20	18.0507	30.0589	12.0081	-2.43416	5.4045			Low-grade tumor-20	16.7051	29.0835	12.3784	-2.06394	4.18126
	T21	18.6829	30.6636	11.9807	-2.46158	5.50819			high-grade tumor-1	17.2622	28.7365	11.4743	-2.968	7.82449
	T22	17.6314	30.6164	12.985	-1.45728	2.74591			high-grade tumor-2	18.2719	29.4975	11.2256	-3.21672	9.2967
	T23	18.6641	30.4283	11.7642	-2.6781	6.40011			high-grade tumor-3	18.5963	29.7493	11.153	-3.28928	9.77622
	T24	18.0733	31.0525	12.9792	-1.4631	2.75701			high-grade tumor-4	16.8271	27.9513	11.1242	-3.31812	9.97361
	T25	16.241	29.2166	12.9756	-1.46674	2.76396			high-grade tumor-5	17.3001	29.1618	11.8617	-2.58059	5.98184
	T26	17.0212	28.9173	11.8962	-2.54615	5.84075			high-grade tumor-6	19.0465	30.8408	11.7943	-2.648	6.268
	T27	18.704	31.6646	12.9606	-1.48174	2.79286			high-grade tumor-7	18.9134	29.9123	10.9988	-3.44347	10.879
	T28	16.5911	27.2951	10.7039	-3.73839	13.3465			high-grade tumor-8	18.8617	29.5661	10.7044	-3.73786	13.3416
	T29	17.1674	30.0566	12.8892	-1.5531	2.93446			high-grade tumor-9	18.0319	29.8044	11.7725	-2.66978	6.36331
	T30	18.9813	30.7183	11.7371	-2.70525	6.52169			high-grade tumor-10	18.6829	30.6636	11.9807	-2.46158	5.50819
	T31	19.2613	29.8799	10.6186	-3.82372	14.1598			high-grade tumor-11	18.6641	30.4283	11.7642	-2.6781	6.40011
	T32	18.101	30.622	12.5211	-1.92125	3.78751			high-grade tumor-12	16.5911	27.2951	10.7039	-3.73839	13.3465
	T33	18.7848	31.2614	12.4765	-1.96577	3.90622			high-grade tumor-13	18.9813	30.7183	11.7371	-2.70525	6.52169
	T34	16.454	27.0522	10.5982	-3.84411	14.3613			high-grade tumor-14	19.2613	29.8799	10.6186	-3.82372	14.1598
	T35	19.3132	29.9022	10.5889	-3.85337	14.4538			high-grade tumor-15	16.454	27.0522	10.5982	-3.84411	14.3613
	T36	16.7051	29.0835	12.3784	-2.06394	4.18126			high-grade tumor-16	19.3132	29.9022	10.5889	-3.85337	14.4538
	T37	18.417	28.8012	10.3843	-4.05804	16.6568			high-grade tumor-17	18.417	28.8012	10.3843	-4.05804	16.6568
	T38	15.9712	27.6455	11.6743	-2.76806	6.8119			high-grade tumor-18	15.9712	27.6455	11.6743	-2.76806	6.8119
	T39	15.353	26.8586	11.5056	-2.93676	7.6569			high-grade tumor-19	15.353	26.8586	11.5056	-2.93676	7.6569
	T40	16.3376	26.8962	10.5586	-3.8837	14.7609			high-grade tumor-20	16.3376	26.8962	10.5586	-3.8837	14.7609
	Figure 2C The expression of hsa_circ_0008922 was analyzed in different pathological types of glioma (normal brain tissues n=10, astrocytoma n=23, glioblastoma n=15, oligodendroglioma n=2)
	Sample Name	GAPDH	hsa-circ008922	Delta Ct	Delta Delta Ct	RQ（2-Delta Delta Ct)
	N1	15.2224	28.2646	13.0422	-1.39989	2.63882
	N2	14.613	28.8886	14.2756	-0.166501	1.12233
	N3	15.718	27.6711	11.9532	-2.48894	5.61367
	N4	14.7461	28.4718	13.7257	-0.7164	1.64308
	N5	15.0449	28.936	13.8911	-0.550973	1.46507
	N6	12.192	27.8873	15.6953	1.25317	0.419527
	N7	11.2457	28.3919	17.1462	2.70413	0.153453
	N8	15.9054	28.8997	12.9943	-1.44783	2.72798
	N9	12.8637	29.3359	16.4722	2.03007	0.244843
	N10	14.9321	30.1595	15.2274	0.7853	0.580231
	astrocytoma-1	17.5615	32.034	14.4725	0.0302356	0.979262
	astrocytoma-2	18.2893	30.1568	11.8675	-2.57477	5.95775
	astrocytoma-3	16.4876	30.6989	14.2114	-0.230942	1.1736
	astrocytoma-4	16.2376	30.7617	14.524	0.0817345	0.944921
	astrocytoma-5	17.2149	30.6989	13.484	-0.958262	1.94297
	astrocytoma-6	17.3001	29.1618	11.8617	-2.58059	5.98185
	astrocytoma-7	19.0465	30.8408	11.7943	-2.648	6.26801
	astrocytoma-8	16.4181	29.8388	13.4206	-1.02168	2.03029
	astrocytoma-9	15.894	29.1013	13.2073	-1.23506	2.35391
	astrocytoma-10	18.0319	29.8044	11.7725	-2.66978	6.36332
	astrocytoma-11	17.6314	30.6164	12.985	-1.45728	2.74591
	astrocytoma-12	18.6641	30.4283	11.7642	-2.6781	6.40012
	astrocytoma-13	18.0733	31.0525	12.9792	-1.4631	2.75701
	astrocytoma-14	16.241	29.2166	12.9756	-1.46674	2.76396
	astrocytoma-15	17.1674	30.0566	12.8892	-1.5531	2.93447
	astrocytoma-16	18.9813	30.7183	11.7371	-2.70525	6.5217
	astrocytoma-17	19.2613	29.8799	10.6186	-3.82372	14.1598
	astrocytoma-18	18.101	30.622	12.5211	-1.92125	3.78752
	astrocytoma-19	18.7848	31.2614	12.4765	-1.96577	3.90623
	astrocytoma-20	16.454	27.0522	10.5982	-3.84411	14.3613
	astrocytoma-21	19.3132	29.9022	10.5889	-3.85337	14.4538
	astrocytoma-22	16.7051	29.0835	12.3784	-2.06394	4.18126
	astrocytoma-23	15.9712	27.6455	11.6743	-2.76806	6.81191
	glioblastoma-1	17.2622	28.7365	11.4743	-2.968	7.82449
	glioblastoma-2	17.9071	30.1753	12.2682	-2.17413	4.51313
	glioblastoma-3	18.2719	29.4975	11.2256	-3.21672	9.2967
	glioblastoma-4	17.7507	29.8952	12.1445	-2.29782	4.91713
	glioblastoma-5	18.5963	29.7493	11.153	-3.28928	9.77622
	glioblastoma-6	16.8271	27.9513	11.1242	-3.31812	9.97361
	glioblastoma-7	18.9134	29.9123	10.9988	-3.44347	10.879
	glioblastoma-8	16.734	28.7932	12.0592	-2.38311	5.2166
	glioblastoma-9	18.8617	29.5661	10.7044	-3.73786	13.3416
	glioblastoma-10	18.0507	30.0589	12.0081	-2.43416	5.4045
	glioblastoma-11	18.6829	30.6636	11.9807	-2.46158	5.50819
	glioblastoma-12	17.0212	28.9173	11.8962	-2.54615	5.84075
	glioblastoma-13	16.5911	27.2951	10.7039	-3.73839	13.3465
	glioblastoma-14	15.353	26.8586	11.5056	-2.93676	7.6569
	glioblastoma-15	16.3376	26.8962	10.5586	-3.8837	14.7609
	oligodendroglioma-1	18.704	31.6646	12.9606	-1.48174	2.79286
	oligodendroglioma-2	18.417	28.8012	10.3843	-4.05804	16.6568

## Sheet: Figure 3
	Figure 3AThe relative expression of hsa_circ_0008922 in common glioma cell lines
	Sample Name	GAPDH	GAPDH CT MEAN	hsa-circ008922	Delta Ct	SF763 Delta Ct MEAN	Delta Delta Ct	RQ（2-Delta Delta Ct）
	SF763-1	13.8846	13.7713	27.877	14.1057	14.1086	-0.00284767	1.00198
	SF763-2	13.7081		27.9518	14.1805		0.0719537	0.951349
	SF763-3	13.7212		27.8108	14.0394		-0.0691195	1.04908
	U87-1	13.4231	13.276	26.838	13.5621		-0.546484	1.46052
	U87-2	13.2333		27.1928	13.9168		-0.191748	1.14215
	U87-3	13.1716		27.591	14.3151		0.206528	0.86662
	U251-1	14.4969	14.313	28.0505	13.7375		-0.371071	1.29331
	U251-2	14.3492		27.6834	13.3704		-0.73819	1.66808
	U251-3	14.0929		27.7377	13.4247		-0.683878	1.60645
	A172-1	15.0801	15.1913	27.3011	12.1097		-1.99882	3.99673
	A172-2	15.6108		27.784	12.5926		-1.51594	2.85985
	A172-3	14.8831		27.5949	12.4036		-1.70499	3.26026
	Figure 3B The hsa_circ_0008922 was down-regulated in A172 cells
	Sample Name	GAPDH	GAPDH CT MEAN	hsa-circ008922	Delta Ct	A172 NC Delta Ct MEAN	Delta Delta Ct	RQ（2-Delta Delta Ct）
	A172 48h NC-1	14.5592	14.5027	26.7789	12.2762	12.2536	0.0225449	0.984495
	A172 48h NC-2	14.6182		26.7225	12.2198		-0.0338101	1.02371
	A172 48h NC-3	14.3307		26.7676	12.2649		0.0112567	0.992228
	A172 48h SI-1 1	15.0544	15.1391	28.4224	13.2832		1.02959	0.489848
	A172 48h SI-1 2	15.0833		28.3035	13.1643		0.91071	0.531923
	A172 48h SI-1 3	15.2798		28.1011	12.962		0.708321	0.612032
	A172 48h SI-2 1	14.3936	14.3956	28.4016	14.006		1.75234	0.29682
	A172 48h SI-2 2	14.4065		27.9616	13.566		1.31242	0.402645
	A172 48h SI-2 3	14.3866		27.9593	13.5637		1.31009	0.403294
	A172 72h NC-1	15.3842	15.6357	29.1348	13.4991	13.5224	-0.0232991	1.01628
	A172 72h NC-2	15.6648		29.1716	13.5359		0.0135222	0.990671
	A172 72h NC-3	15.8582		29.1679	13.5321		0.00978385	0.993241
	A172 72h SI-1 1	15.2026	15.1872	29.1028	13.9157		0.39332	0.761375
	A172 72h SI-1 2	15.2073		29.7787	14.5916		1.0692	0.476583
	A172 72h SI-1 3	15.1516		29.2999	14.1127		0.590361	0.664177
	A172 72h SI-2 1	15.2319	15.2517	29.1672	13.9155		0.393166	0.761457
	A172 72h SI-2 2	15.4339		29.2439	13.9922		0.469796	0.722067
	A172 72h SI-2 3	15.0893		29.2249	13.9732		0.450837	0.731618
	Figure 3C The hsa_circ_0008922 was down-regulated in U251 cells
	Sample Name	GAPDH	GAPDH CT MEAN	hsa-circ008922	Delta Ct	U251 NC Delta Ct MEAN	Delta Delta Ct	RQ（2-Delta Delta Ct）
	U251 48h NC-1	15.4081	15.5714	28.5863	13.0148	13.0235	-0.00865634	1.00602
	U251 48h NC-2	15.5659		28.5172	12.9457		-0.0777672	1.05538
	U251 48h NC-3	15.7403		28.6813	13.1099		0.0864288	0.941851
	U251 48h SI-1 1	14.9855	14.8898	29.2126	14.3229		1.29936	0.406306
	U251 48h SI-1 2	14.8094		29.195	14.3052		1.28173	0.411303
	U251 48h SI-1 3	14.8744		29.0992	14.2095		1.18596	0.439533
	U251 48h SI-2 1	14.7961	14.8065	29.5986	14.7921		1.76862	0.29349
	U251 48h SI-2 2	14.9052		29.3922	14.5858		1.5623	0.338611
	U251 48h SI-2 3	14.718		29.788	14.9815		1.95801	0.257383
	U251 72h NC-1	14.7364	14.4851	28.6288	14.1437	14.317	-0.173322	1.12765
	U251 72h NC-2	14.1022		28.9408	14.4557		0.138669	0.908357
	U251 72h NC-3	14.6166		28.8367	14.3517		0.0346426	0.976274
	U251 72h SI-1 1	12.9807	13.458	28.5174	15.0594		0.742391	0.597748
	U251 72h SI-1 2	13.7075		27.997	14.539		0.222028	0.857359
	U251 72h SI-1 3	13.6858		28.3174	14.8595		0.542436	0.686611
	U251 72h SI-2 1	14.5267	14.6186	28.9821	14.3635		0.0465176	0.968271
	U251 72h SI-2 2	14.6545		29.9385	15.3199		1.00292	0.49899
	U251 72h SI-2 3	14.6744		29.2458	14.6272		0.310175	0.806544

## Sheet: Figure4
Figure 4 wound healing of A172 and U251 cells
Figure 4C		Blank area	NC(Blank area) mean			Blank area	s2-hsa_circ_0008922(Blank area) mean
A172 0h	NC-1	777514	780498		s2-hsa_circ_0008922-1	692011	694056
	NC-2	781589			s2-hsa_circ_0008922-2	692108
	NC-3	782390			s2-hsa_circ_0008922-3	698049
A172 12h	NC-1	600899	0.769892	0.230108	s2-hsa_circ_0008922-1	561286	0.808704	0.191296
	NC-2	563213	0.721608	0.278392	s2-hsa_circ_0008922-2	582411	0.839141	0.160859
	NC-3	541059	0.693223	0.306777	s2-hsa_circ_0008922-3	517909	0.746206	0.253794
A172 24h	NC-1	109013	0.139671	0.860329	s2-hsa_circ_0008922-1	388462	0.559698	0.440302
	NC-2	111159	0.142421	0.857579	s2-hsa_circ_0008922-2	332095	0.478484	0.521516
	NC-3	92561	0.118592	0.881408	s2-hsa_circ_0008922-3	360278	0.519091	0.480909
Figure 4D
U251 0h	NC-1	773195	779024		s2-hsa_circ_0008922-1	787981	785793
	NC-2	784853			s2-hsa_circ_0008922-2	783605
	NC-3	779024			s2-hsa_circ_0008922-3	785793
U251 6h	NC-1	471935	0.605803	0.394197	s2-hsa_circ_0008922-1	545610	0.694343	0.305657
	NC-2	440498	0.565449	0.434551	s2-hsa_circ_0008922-2	577907	0.735444	0.264556
	NC-3	492395	0.632067	0.367933	s2-hsa_circ_0008922-3	614883	0.7825	0.2175
U251 12h	NC-1	340272	0.436793	0.563207	s2-hsa_circ_0008922-1	461893	0.587805	0.412195
	NC-2	338214	0.434151	0.565849	s2-hsa_circ_0008922-2	527147	0.670847	0.329153
	NC-3	345811	0.443903	0.556097	s2-hsa_circ_0008922-3	501228	0.637863	0.362137

## Sheet: Figure5
Figure 5 Migration and invasion of A172 and U251 cells
A172 migration Number of Cells	NC-1	112	s2-hsa_circ_0008922-1	81
	NC-2	108	s2-hsa_circ_0008922-2	89
	NC-3	111	s2-hsa_circ_0008922-3	89
A172 Invasion Number of Cells	NC-1	131	s2-hsa_circ_0008922-1	57
	NC-2	100	s2-hsa_circ_0008922-2	66
	NC-3	86	s2-hsa_circ_0008922-3	49
U251 migration Number of Cells	NC-1	128	s2-hsa_circ_0008922-1	106
	NC-2	129	s2-hsa_circ_0008922-2	93
	NC-3	137	s2-hsa_circ_0008922-3	98
U251 Invasion Number of Cells	NC-1	112	s2-hsa_circ_0008922-1	93
	NC-2	120	s2-hsa_circ_0008922-2	100
	NC-3	131	s2-hsa_circ_0008922-3	84

## Sheet: Figure6
Figure 6 Cell viability of A172 and U251 cells cck8
Figure 6C	A172	NC-1	NC-2	NC-3	s2-hsa_circ_0008922-1	s2-hsa_circ_0008922-2	s2-hsa_circ_0008922-3
	0h	0.379	0.383	0.373	0.352	0.362	0.355
	24h	0.765	0.551	0.693	0.544	0.569	0.598
	48h	1.119	1.147	1.06	0.912	0.924	0.918
	72h	1.414	1.492	1.512	1.386	1.369	1.392
	96h	2.049	1.787	1.832	1.648	1.688	1.554
Figure 6D	U251	NC-1	NC-2	NC-3	s2-hsa_circ_0008922-1	s2-hsa_circ_0008922-2	s2-hsa_circ_0008922-3
	0h	0.4426	0.4362	0.4464	0.4496	0.4532	0.4714
	24h	0.6922	0.76525	0.8075	0.578	0.624	0.638333
	48h	1.1724	0.98325	1.07833	0.907333	0.845	0.999667
	72h	1.67625	2.0365	1.743	1.44933	1.44125	1.14225
	96h	1.9874	2.5495	2.67875	1.345	1.792	1.2445

## Sheet: Figure7
Figure 7 Influence of apoptosis after hsa_circ_0008922 depletion of glioma cells
Figure 7B	NC-1	NC-2	NC-3		s2-hsa_circ_0008922-1	s2-hsa_circ_0008922-2	s2-hsa_circ_0008922-3
Q2+Q3	11.73	9.69	10.75		18.67	17.98	20.42
Figure 7C	NC-1	NC-2	NC-3		s2-hsa_circ_0008922-1	s2-hsa_circ_0008922-2	s2-hsa_circ_0008922-3
Q2+Q3	13.8	12.66	12.2		17.79	17.22	17.32
Figure 7E A172	GAPDH	average value	pixel point
	NC-1	217.68	234	50937.1
	NC-2	191.04	338	64571.5
	NC-3	219.27	220	48239.4
				54582.7
	SI-1	232.62	207	48152.3
	SI-2	209.91	297	62343.3
	SI-3	226.08	222	50189.8
				53561.8
A172	cas3	average value	pixel point
	NC-1	222.48	377	83875	54582.7	1.53666	1.42477	1.07853
	NC-2	226.61	343	77727.2	54582.7	1.42403	1.42477	0.999479
	NC-3	230.55	311	71701.1	54582.7	1.31362	1.42477	0.92199
						1.42477
	SI-1	232.83	401	93364.8	53561.8	1.74312	1.42477	1.22344
	SI-2	215.88	561	121109	53561.8	2.2611	1.42477	1.58699
	SI-3	223.7	488	109166	53561.8	2.03812	1.42477	1.43049
A172	GAPDH	average value	pixel point
	NC-1	238.2	388	92421.6
	NC-2	227.78	447	101818
	NC-3	235.22	396	93147.1
				95795.5
	SI-1	245.61	446	109542
	SI-2	239.16	489	116949
	SI-3	245.11	442	108339
A172	cas9	average value	pixel point
	NC-1	155.31	263	40846.5	95795.5	0.426393	0.374032	1.13999
	NC-2	167.83	180	30209.4	95795.5	0.315353	0.374032	0.843118
	NC-3	160.51	227	36435.8	95795.5	0.38035	0.374032	1.01689
						0.374032
	SI-1	172.29	363	62541.3	108940	0.574087	0.374032	1.53486
	SI-2	183.91	292	53701.7	108940	0.492946	0.374032	1.31793
	SI-3	189.72	233	44204.8	108940	0.40577	0.374032	1.08485
Figure 7F U251	GAPDH	average value	pixel point
	NC-1	242.97	411	99860.7
	NC-2	241.55	421	101693
	NC-3	242.3	391	94739.3
				98764.2
	SI-1	245.83	401	98577.8
	SI-2	245.75	383	94122.2
	SI-3	233.55	476	111170
				101290
	U251/cas3	average value	pixel point
	NC-1	143.32	513	73523.2	98764.2	0.744431	0.688498	1.08124
	NC-2	149.54	462	69087.5	98764.2	0.69952	0.688498	1.01601
	NC-3	159.86	384	61386.2	98764.2	0.621544	0.688498	0.902753
						0.688498
	SI-1	197.71	531	104984	101290	1.03647	0.688498	1.50541
	SI-2	211.05	445	93917.2	101290	0.927212	0.688498	1.34672
	SI-3	188.81	591	111587	101290	1.10166	0.688498	1.60009
	U251/GAPDH	average value	pixel point
	NC-1	244.27	435	106257
	NC-2	231.86	512	118712
	NC-3	246.78	410	101180
				108717
	SI-1	208.54	455	94885.7
	SI-2	210.53	444	93475.3
	SI-3	199.27	480	95649.6
				94670.2
	U251/cas9	average value	pixel point
	NC-1	220.57	175	38599.8	108717	0.35505	0.357037	0.994434
	NC-2	217.7	187	40709.9	108717	0.374459	0.357037	1.0488
	NC-3	219.75	169	37137.8	108717	0.341602	0.357037	0.956769
						0.357037
	SI-1	242.52	332	80516.6	94670.2	0.850496	0.357037	2.3821
	SI-2	246.35	278	68485.3	94670.2	0.723409	0.357037	2.02615
	SI-3	239.34	353	84487	94670.2	0.892435	0.357037	2.49956

## Sheet: Table 1 and Table 2
Sample Name	Pathology diagnosis	gender	WHO grade	Age	hsa_circ_0008922 expression	glioma grade	Tumor size (diameter)	GFAP	P53	ki67(Bounded by 20%)	MGMT	KPS	IDH	1p/19q codeletion
T1	astrocytoma	Female	II	56	0.979262	Low grade	4.5x4x1	+	+	<	+	100	Mut	codeletion
T2	glioblastoma	Female	IV	54	7.82451	High grade	4.5*2.5*2.3	+	+	>	-	80	Wt
T3	glioblastoma	Female	IV	57	4.51314	High grade	3.5*2.5*0.8	+	+++	<	-	70	Wt
T4	astrocytoma	Female	II	34	5.95775	Low grade	6*5.5*2.4	+	+++	<	+	20	Mut
T5	glioblastoma	Female	IV	63	9.29671	High grade	6.1x5.0x6.1	+	+++	>	-	50	Wt
T6	glioblastoma	Male	IV	56	4.91714	High grade	3.5x2.5x1.3	+	+++	>	+	100	Wt
T7	glioblastoma	Male	IV	64	9.77624	High grade	5.6x4.9x5.9	+	++	>	+	60	Wt
T8	astrocytoma	Male	II	45	1.1736	Low grade	3.5x3.8x4.5	+	+	<	+	80	Mut	codeletion
T9	glioblastoma	Female	IV	59	9.97363	High grade	5x3.6x4.2	+	+	>	+	40	Wt
T10	astrocytoma	Male	II	58	0.944923	Low grade	4.8x3.8x3.8	+	+	<	+	100	Mut	codeletion
T11	astrocytoma	Male	II	36	1.94297	Low grade	3.8x4.4	+	+	<	+	80	Mut
T12	astrocytoma	Male	II	43	5.98185	Low grade	7.1x8.6	+	+++	<	+	80	Mut	codeletion
T13	astrocytoma	Male	II	35	6.26801	Low grade	8.1x4.9x7.2	+	+++	<	+	70	Mut
T14	glioblastoma	Female	IV	70	10.879	High grade	6.5x4.5x2	+	+	=	+	80	Wt
T15	glioblastoma	Male	IV	30	5.21661	High grade	2.8x4.6x3.7	+	+	>	-	80	Wt
T16	astrocytoma	Female	II	33	2.03029	Low grade	4.3x2.2x2.7	+	+	<	+	80	Mut
T17	glioblastoma	Female	IV	37	13.3417	High grade	5.6x5.2x5.8	+	+	>	-	80	Wt
T18	astrocytoma	Male	II	33	2.35391	Low grade	2x1.5x	+	+++	<	+	50	Mut	non-codeletion
T19	astrocytoma	Female	II	41	6.36332	Low grade	9*5.3*3	+	+	<	+	80	Mut	codeletion
T20	glioblastoma	Female	IV	41	5.40451	High grade	3.5x4.5x4.2	+	+	>	-	80	Wt
T21	glioblastoma	Male	IV	42	5.50819	High grade	4.2*2.3*1.6	+	+	<	-	80	Wt
T22	astrocytoma	Male	II	54	2.74591	Low grade	3*1.9*1.2	+	+++	<	+	50	Mut	codeletion
T23	astrocytoma	Male	I	4	6.40012	Low grade	5.7x5.2x4.1	+	+++	<	-	80	Wt
T24	astrocytoma	Female	II	33	2.75701	Low grade	5*4*1	+	+	<	+	40
T25	astrocytoma	Female	II	42	2.76396	Low grade	1.2*1.0*0.4	+	+	<	+	70
T26	glioblastoma	Male	IV	46	5.84076	High grade	3.3*3.4*2.3	+	-	>	-	20
T27	oligodendroglioma	Male	I	11	2.79286	Low grade	3.7*4.6*4.8	+	+	<	+	80
T28	glioblastoma	Male	IV	46	13.3465	High grade	5*5*1.5	+	+	>	+	60
T29	astrocytoma	Male	I	19	2.93447	Low grade	1.1*0.9（2.2*1.5*0.5）	+	++	<	+	80
T30	astrocytoma	Male	I	42	6.5217	Low grade	5.9*4.5*4.9	+	+	>	-	80
T31	astrocytoma	Male	III	45	14.1598	High grade	5*5*2	+	+	>	+	70
T32	astrocytoma	Male	II	7	3.78752	Low grade	3*1.5*1	+	+	<	+	80
T33	astrocytoma	Male	I	12	3.90623	Low grade	5.6*4.4*4.9	+	+	<	-	80
T34	astrocytoma	Male	III	55	14.3613	High grade	5.3*5.0*6.0	-	+	=	-	50
T35	astrocytoma	Female	III	34	14.4538	High grade	6.9*6.7*7.0	+	+	>	+	80
T36	astrocytoma	Male	I	32	4.18126	Low grade	3.1*3.7*3.1	+	+	<	+	40
T37	oligodendroglioma	Female	III	55	16.6568	High grade	6.5*7.8（7*7*1.5）	+	+	>	-	50
T38	astrocytoma	Female	I	31	6.81191	Low grade	7.0*4.5*5.6	+	+	<	-	80
T39	glioblastoma	Female	IV	3	7.6569	High grade	6.7*6.2*5.5	+	+	>	-	50
T40	glioblastoma	Male	IV	28	14.7609	High grade	4.8*2.8*4.4	+	++	>	-	50
